# Supplementary material
Source: publisher figshare collection journal article supplement (https://acs.figshare.com/ndownloader/files/8860843)
Supplement: Supplementary file 1 [file 8860843]

data_cx0584a
_audit_creation_date              2015-10-15
_audit_creation_method
;
Olex2 1.2
(compiled 2015.09.30 svn.r3233 for OlexSys, GUI svn.r5103)
;
_shelxl_version_number            2013-4
_publ_contact_author_address      ?
_publ_contact_author_email        ?
_publ_contact_author_name         ''
_publ_contact_author_phone        ?
_publ_section_references
;
Dolomanov, O.V., Bourhis, L.J., Gildea, R.J, Howard, J.A.K. & Puschmann, H.
 (2009), J. Appl. Cryst. 42, 339-341.

Sheldrick, G.M. (2015). Acta Cryst. A71, 3-8.

Sheldrick, G.M. (2015). Acta Cryst. C71, 3-8.
;
_chemical_name_common             ?
_chemical_name_systematic
;
 ?
;
_chemical_formula_moiety          'C48 H100 O2 Sc2 Si6'
_chemical_formula_sum             'C48 H100 O2 Sc2 Si6'
_chemical_formula_weight          967.73
_chemical_melting_point           ?
loop_
  _atom_type_symbol
  _atom_type_description
  _atom_type_scat_dispersion_real
  _atom_type_scat_dispersion_imag
  _atom_type_scat_source
 'C' 'C' 0.0033 0.0016 'International Tables Vol C Tables 4.2.6.8 and 6.1.1.4'
 'H' 'H' 0.0000 0.0000 'International Tables Vol C Tables 4.2.6.8 and 6.1.1.4'
 'O' 'O' 0.0106 0.0060 'International Tables Vol C Tables 4.2.6.8 and 6.1.1.4'
 'Si' 'Si' 0.0817 0.0704 'International Tables Vol C Tables 4.2.6.8 and 6.1.1.4'
 'Sc' 'Sc' 0.2519 0.3716 'International Tables Vol C Tables 4.2.6.8 and 6.1.1.4'

_shelx_space_group_comment
;
The symmetry employed for this shelxl refinement is uniquely defined
by the following loop, which should always be used as a source of
symmetry information in preference to the above space-group names.
They are only intended as comments.
;
_space_group_crystal_system       'monoclinic'
_space_group_IT_number            14
_space_group_name_H-M_alt         'P 1 21/c 1'
_space_group_name_Hall            '-P 2ybc'
loop_
  _space_group_symop_operation_xyz
 'x, y, z'
 '-x, y+1/2, -z+1/2'
 '-x, -y, -z'
 'x, -y-1/2, z-1/2'

_cell_length_a                    14.3075(14)
_cell_length_b                    24.950(2)
_cell_length_c                    17.0373(16)
_cell_angle_alpha                 90
_cell_angle_beta                  98.009(6)
_cell_angle_gamma                 90
_cell_volume                      6022.6(10)
_cell_formula_units_Z             4
_cell_measurement_reflns_used     9495
_cell_measurement_temperature     100(2)
_cell_measurement_theta_max       27.134
_cell_measurement_theta_min       2.414
_shelx_estimated_absorpt_T_max    0.963
_shelx_estimated_absorpt_T_min    0.851
_exptl_absorpt_coefficient_mu     0.376
_exptl_absorpt_correction_T_max   0.7460
_exptl_absorpt_correction_T_min   0.6255
_exptl_absorpt_correction_type    multi-scan
_exptl_absorpt_process_details
;
SADABS-2014/5 (Bruker,2014/5) was used for absorption correction.
wR2(int) was 0.1123 before and 0.0587 after correction.
The Ratio of minimum to maximum transmission is 0.8385.
The \l/2 correction factor is 0.00150.
;
_exptl_crystal_colour             'colourless'
_exptl_crystal_density_diffrn     1.067
_exptl_crystal_density_meas       ?
_exptl_crystal_density_method     ?
_exptl_crystal_description        'plate'
_exptl_crystal_F_000              2120
_exptl_crystal_size_max           0.445
_exptl_crystal_size_mid           0.165
_exptl_crystal_size_min           0.1
_exptl_special_details
;
 ?
;
_exptl_transmission_factor_max    ?
_exptl_transmission_factor_min    ?
_diffrn_reflns_av_R_equivalents   0.0682
_diffrn_reflns_av_unetI/netI      0.0541
_diffrn_reflns_Laue_measured_fraction_full 1.000
_diffrn_reflns_Laue_measured_fraction_max 0.992
_diffrn_reflns_limit_h_max        20
_diffrn_reflns_limit_h_min        -20
_diffrn_reflns_limit_k_max        35
_diffrn_reflns_limit_k_min        -35
_diffrn_reflns_limit_l_max        23
_diffrn_reflns_limit_l_min        -23
_diffrn_reflns_number             143090
_diffrn_reflns_point_group_measured_fraction_full 1.000
_diffrn_reflns_point_group_measured_fraction_max 0.992
_diffrn_reflns_theta_full         25.242
_diffrn_reflns_theta_max          30.146
_diffrn_reflns_theta_min          1.457
_diffrn_ambient_temperature       100.05
_diffrn_detector_area_resol_mean  8
_diffrn_measured_fraction_theta_full 1.000
_diffrn_measured_fraction_theta_max 0.992
_diffrn_measurement_device_type   'Bruker Kappa APEX CCD area detector'
_diffrn_measurement_method        '\w and \f scans'
_diffrn_radiation_monochromator   'QuazarTM optics'
_diffrn_radiation_type            MoK\a
_diffrn_radiation_wavelength      0.71073
_diffrn_source                    microsource
_diffrn_standards_number          .
_reflns_Friedel_coverage          0.000
_reflns_Friedel_fraction_full     .
_reflns_Friedel_fraction_max      .
_reflns_number_gt                 12099
_reflns_number_total              17663
_reflns_special_details
;
 Reflections were merged by SHELXL according to the crystal
 class for the calculation of statistics and refinement.
 
 _reflns_Friedel_fraction is defined as the number of unique
 Friedel pairs measured divided by the number that would be
 possible theoretically, ignoring centric projections and
 systematic absences.
;
_reflns_threshold_expression      'I > 2\s(I)'
_computing_cell_refinement        'SAINT V8.34A (Bruker, 2013)'
_computing_data_collection        'APEX2 V2014.11-0 (Bruker, 2014)'
_computing_data_reduction         'Bruker SAINT'
_computing_molecular_graphics     'Olex2 (Dolomanov et al., 2009)'
_computing_publication_material   'Olex2 (Dolomanov et al., 2009)'
_computing_structure_refinement   'ShelXL (Sheldrick, 2015)'
_computing_structure_solution     'ShelXT (Sheldrick, 2015)'
_refine_diff_density_max          0.850
_refine_diff_density_min          -0.324
_refine_diff_density_rms          0.091
_refine_ls_extinction_coef        .
_refine_ls_extinction_method      none
_refine_ls_goodness_of_fit_ref    1.079
_refine_ls_hydrogen_treatment     constr
_refine_ls_matrix_type            full
_refine_ls_number_parameters      557
_refine_ls_number_reflns          17663
_refine_ls_number_restraints      0
_refine_ls_R_factor_all           0.0988
_refine_ls_R_factor_gt            0.0586
_refine_ls_restrained_S_all       1.079
_refine_ls_shift/su_max           0.002
_refine_ls_shift/su_mean          0.000
_refine_ls_structure_factor_coef  Fsqd
_refine_ls_weighting_details
'w=1/[\s^2^(Fo^2^)+(0.0592P)^2^+6.0317P] where P=(Fo^2^+2Fc^2^)/3'
_refine_ls_weighting_scheme       calc
_refine_ls_wR_factor_gt           0.1292
_refine_ls_wR_factor_ref          0.1513
_refine_special_details
;
 ?
;
_olex2_refinement_description
;
1. Fixed Uiso
 At 1.2 times of:
  All C(H,H) groups, All C(H,H,H,H) groups
 At 1.5 times of:
  All C(H,H,H) groups
2. Others
 Sof(H22C)=Sof(H22D)=Sof(C23B)=Sof(H23C)=Sof(H23D)=Sof(H24C)=Sof(H24D)=1-FVAR(1)
 Sof(H22A)=Sof(H22B)=Sof(C23)=Sof(H23A)=Sof(H23B)=Sof(H24A)=Sof(H24B)=FVAR(1)
3.a Secondary CH2 refined with riding coordinates:
 C6(H6A,H6B), C13(H13A,H13B), C17(H17A,H17B), C21(H21A,H21B), C22(H22A,H22B),
 C22(H22C,H22D), C23(H23A,H23B), C23B(H23C,H23D), C24(H24A,H24B), C24(H24C,
 H24D), C6A(H6AA,H6AB), C13A(H13C,H13D), C17A(H17C,H17D), C21A(H21C,H21D),
 C22A(H22E,H22F), C23A(H23E,H23F), C24A(H24E,H24F)
3.b Idealised Me refined as rotating group:
 C7(H7A,H7B,H7C), C8(H8A,H8B,H8C), C9(H9A,H9B,H9C), C10(H10A,H10B,H10C),
 C11(H11A,H11B,H11C), C12(H12A,H12B,H12C), C14(H14A,H14B,H14C), C15(H15A,H15B,
 H15C), C16(H16A,H16B,H16C), C18(H18A,H18B,H18C), C19(H19A,H19B,H19C), C20(H20A,
 H20B,H20C), C7A(H7AA,H7AB,H7AC), C8A(H8AA,H8AB,H8AC), C9A(H9AA,H9AB,H9AC),
 C10A(H10D,H10E,H10F), C11A(H11D,H11E,H11F), C12A(H12D,H12E,H12F), C14A(H14D,
 H14E,H14F), C15A(H15D,H15E,H15F), C16A(H16D,H16E,H16F), C18A(H18D,H18E,H18F),
 C19A(H19D,H19E,H19F), C20A(H20D,H20E,H20F)
;
_atom_sites_solution_hydrogens    geom
_atom_sites_solution_primary      ?
_atom_sites_solution_secondary    ?
loop_
  _atom_site_label
  _atom_site_type_symbol
  _atom_site_fract_x
  _atom_site_fract_y
  _atom_site_fract_z
  _atom_site_U_iso_or_equiv
  _atom_site_adp_type
  _atom_site_occupancy
  _atom_site_site_symmetry_order
  _atom_site_calc_flag
  _atom_site_refinement_flags_posn
  _atom_site_refinement_flags_adp
  _atom_site_refinement_flags_occupancy
  _atom_site_disorder_assembly
  _atom_site_disorder_group
 Sc1 Sc 0.94065(3) 0.61692(2) 0.72278(2) 0.01854(9) Uani 1 1 d . . . . .
 Si1 Si 1.02056(5) 0.57822(3) 0.93527(4) 0.02478(15) Uani 1 1 d . . . . .
 Si2 Si 1.14262(5) 0.58816(3) 0.60171(4) 0.02788(15) Uani 1 1 d . . . . .
 Si3 Si 1.00802(5) 0.75532(3) 0.75407(4) 0.02490(14) Uani 1 1 d . . . . .
 O1 O 0.85285(12) 0.63890(7) 0.61354(10) 0.0253(4) Uani 1 1 d . . . . .
 C1 C 0.93844(15) 0.56315(9) 0.84263(13) 0.0198(4) Uani 1 1 d . . . . .
 C2 C 0.84249(16) 0.58013(9) 0.81937(14) 0.0210(4) Uani 1 1 d . . . . .
 C3 C 0.80784(16) 0.55544(9) 0.74659(14) 0.0219(5) Uani 1 1 d . . . . .
 C4 C 0.88007(16) 0.52227(9) 0.72413(13) 0.0220(5) Uani 1 1 d . . . . .
 C5 C 0.95943(15) 0.52609(9) 0.78303(13) 0.0204(4) Uani 1 1 d . . . . .
 C6 C 1.04532(16) 0.51444(10) 0.99187(14) 0.0250(5) Uani 1 1 d . . . . .
 H6A H 1.0818 0.4902 0.9615 0.030 Uiso 1 1 calc R . . . .
 H6B H 1.0847 0.5224 1.0430 0.030 Uiso 1 1 calc R . . . .
 C7 C 0.9704(2) 0.62629(12) 1.00239(16) 0.0421(7) Uani 1 1 d . . . . .
 H7A H 0.9598 0.6610 0.9758 0.063 Uiso 1 1 calc GR . . . .
 H7B H 1.0147 0.6307 1.0513 0.063 Uiso 1 1 calc GR . . . .
 H7C H 0.9103 0.6124 1.0152 0.063 Uiso 1 1 calc GR . . . .
 C8 C 1.1356(2) 0.60712(12) 0.91481(17) 0.0405(7) Uani 1 1 d . . . . .
 H8A H 1.1671 0.5816 0.8836 0.061 Uiso 1 1 calc GR . . . .
 H8B H 1.1759 0.6143 0.9651 0.061 Uiso 1 1 calc GR . . . .
 H8C H 1.1239 0.6406 0.8851 0.061 Uiso 1 1 calc GR . . . .
 C9 C 0.78514(18) 0.61494(10) 0.86640(16) 0.0299(5) Uani 1 1 d . . . . .
 H9A H 0.8208 0.6475 0.8832 0.045 Uiso 1 1 calc GR . . . .
 H9B H 0.7713 0.5953 0.9132 0.045 Uiso 1 1 calc GR . . . .
 H9C H 0.7259 0.6248 0.8335 0.045 Uiso 1 1 calc GR . . . .
 C10 C 0.70937(17) 0.56017(11) 0.70260(16) 0.0316(6) Uani 1 1 d . . . . .
 H10A H 0.6774 0.5907 0.7233 0.047 Uiso 1 1 calc GR . . . .
 H10B H 0.6742 0.5272 0.7098 0.047 Uiso 1 1 calc GR . . . .
 H10C H 0.7124 0.5656 0.6460 0.047 Uiso 1 1 calc GR . . . .
 C11 C 0.87125(19) 0.48562(10) 0.65334(14) 0.0298(5) Uani 1 1 d . . . . .
 H11A H 0.8071 0.4880 0.6245 0.045 Uiso 1 1 calc GR . . . .
 H11B H 0.8841 0.4487 0.6711 0.045 Uiso 1 1 calc GR . . . .
 H11C H 0.9168 0.4964 0.6183 0.045 Uiso 1 1 calc GR . . . .
 C12 C 1.04597(17) 0.49201(10) 0.78513(16) 0.0280(5) Uani 1 1 d . . . . .
 H12A H 1.0570 0.4841 0.7308 0.042 Uiso 1 1 calc GR . . . .
 H12B H 1.0370 0.4584 0.8130 0.042 Uiso 1 1 calc GR . . . .
 H12C H 1.1005 0.5112 0.8129 0.042 Uiso 1 1 calc GR . . . .
 C13 C 1.08289(17) 0.61026(10) 0.68527(14) 0.0259(5) Uani 1 1 d . . . . .
 H13A H 1.1066 0.6474 0.6933 0.031 Uiso 1 1 calc R . . . .
 H13B H 1.1176 0.5897 0.7298 0.031 Uiso 1 1 calc R . . . .
 C14 C 1.1298(2) 0.51441(11) 0.58136(17) 0.0361(6) Uani 1 1 d . . . . .
 H14A H 1.1573 0.4943 0.6284 0.054 Uiso 1 1 calc GR . . . .
 H14B H 1.1627 0.5050 0.5365 0.054 Uiso 1 1 calc GR . . . .
 H14C H 1.0628 0.5054 0.5686 0.054 Uiso 1 1 calc GR . . . .
 C15 C 1.2733(2) 0.60228(13) 0.6196(2) 0.0437(7) Uani 1 1 d . . . . .
 H15A H 1.2836 0.6410 0.6259 0.066 Uiso 1 1 calc GR . . . .
 H15B H 1.3025 0.5894 0.5744 0.066 Uiso 1 1 calc GR . . . .
 H15C H 1.3016 0.5838 0.6679 0.066 Uiso 1 1 calc GR . . . .
 C16 C 1.0949(2) 0.62394(13) 0.50728(17) 0.0411(7) Uani 1 1 d . . . . .
 H16A H 1.0357 0.6070 0.4839 0.062 Uiso 1 1 calc GR . . . .
 H16B H 1.1410 0.6218 0.4699 0.062 Uiso 1 1 calc GR . . . .
 H16C H 1.0831 0.6616 0.5190 0.062 Uiso 1 1 calc GR . . . .
 C17 C 0.93677(17) 0.69796(9) 0.77940(14) 0.0239(5) Uani 1 1 d . . . . .
 H17A H 0.8701 0.7098 0.7703 0.029 Uiso 1 1 calc R . . . .
 H17B H 0.9529 0.6923 0.8372 0.029 Uiso 1 1 calc R . . . .
 C18 C 1.13355(19) 0.74745(11) 0.80276(16) 0.0338(6) Uani 1 1 d . . . . .
 H18A H 1.1353 0.7471 0.8605 0.051 Uiso 1 1 calc GR . . . .
 H18B H 1.1715 0.7774 0.7876 0.051 Uiso 1 1 calc GR . . . .
 H18C H 1.1593 0.7137 0.7856 0.051 Uiso 1 1 calc GR . . . .
 C19 C 1.0112(2) 0.76186(12) 0.64458(16) 0.0366(6) Uani 1 1 d . . . . .
 H19A H 1.0256 0.7269 0.6228 0.055 Uiso 1 1 calc GR . . . .
 H19B H 1.0599 0.7878 0.6353 0.055 Uiso 1 1 calc GR . . . .
 H19C H 0.9496 0.7743 0.6185 0.055 Uiso 1 1 calc GR . . . .
 C20 C 0.9645(2) 0.82129(11) 0.7871(2) 0.0481(8) Uani 1 1 d . . . . .
 H20A H 0.8977 0.8256 0.7658 0.072 Uiso 1 1 calc GR . . . .
 H20B H 1.0012 0.8504 0.7677 0.072 Uiso 1 1 calc GR . . . .
 H20C H 0.9719 0.8224 0.8452 0.072 Uiso 1 1 calc GR . . . .
 C21 C 0.8487(2) 0.60737(11) 0.54133(15) 0.0365(6) Uani 1 1 d . . . . .
 H21A H 0.7971 0.5807 0.5377 0.044 Uiso 1 1 calc R . . . .
 H21B H 0.9091 0.5885 0.5390 0.044 Uiso 1 1 calc R . . . .
 C22 C 0.8301(3) 0.64861(16) 0.47586(19) 0.0576(10) Uani 1 1 d . . . . .
 H22A H 0.8812 0.6470 0.4423 0.069 Uiso 0.341(13) 1 calc R . P A 1
 H22B H 0.7700 0.6399 0.4421 0.069 Uiso 0.341(13) 1 calc R . P A 1
 H22C H 0.8894 0.6655 0.4646 0.069 Uiso 0.659(13) 1 calc R . P A 2
 H22D H 0.7971 0.6325 0.4265 0.069 Uiso 0.659(13) 1 calc R . P A 2
 C23 C 0.8252(9) 0.6974(3) 0.5039(5) 0.029(3) Uani 0.341(13) 1 d . . P A 1
 H23A H 0.7772 0.7191 0.4705 0.035 Uiso 0.341(13) 1 calc R . P A 1
 H23B H 0.8870 0.7158 0.5084 0.035 Uiso 0.341(13) 1 calc R . P A 1
 C23B C 0.7681(6) 0.6884(2) 0.5105(3) 0.0439(18) Uani 0.659(13) 1 d . . P A 2
 H23C H 0.7797 0.7250 0.4918 0.053 Uiso 0.659(13) 1 calc R . P A 2
 H23D H 0.7007 0.6795 0.4945 0.053 Uiso 0.659(13) 1 calc R . P A 2
 C24 C 0.7923(2) 0.68494(12) 0.59598(18) 0.0417(7) Uani 1 1 d . . . . .
 H24A H 0.8086 0.7148 0.6336 0.050 Uiso 0.341(13) 1 calc R . P A 1
 H24B H 0.7246 0.6759 0.5931 0.050 Uiso 0.341(13) 1 calc R . P A 1
 H24C H 0.8255 0.7179 0.6167 0.050 Uiso 0.659(13) 1 calc R . P A 2
 H24D H 0.7345 0.6810 0.6212 0.050 Uiso 0.659(13) 1 calc R . P A 2
 Sc1A Sc 0.56818(3) 0.35507(2) 0.78779(2) 0.01744(9) Uani 1 1 d . . . . .
 Si1A Si 0.49157(5) 0.43493(3) 0.59490(4) 0.02484(15) Uani 1 1 d . . . . .
 Si2A Si 0.48227(5) 0.22555(3) 0.72265(4) 0.02513(15) Uani 1 1 d . . . . .
 Si3A Si 0.36570(5) 0.38395(3) 0.90485(4) 0.02633(15) Uani 1 1 d . . . . .
 O1A O 0.64664(11) 0.31589(6) 0.89058(9) 0.0236(3) Uani 1 1 d . . . . .
 C1A C 0.57446(15) 0.42678(9) 0.68920(13) 0.0197(4) Uani 1 1 d . . . . .
 C2A C 0.56908(15) 0.45391(9) 0.76307(13) 0.0200(4) Uani 1 1 d . . . . .
 C3A C 0.65254(15) 0.44325(9) 0.81509(13) 0.0197(4) Uani 1 1 d . . . . .
 C4A C 0.71204(15) 0.41093(9) 0.77435(13) 0.0183(4) Uani 1 1 d . . . . .
 C5A C 0.66527(15) 0.40138(9) 0.69704(13) 0.0194(4) Uani 1 1 d . . . . .
 C6A C 0.53083(19) 0.49405(10) 0.54034(14) 0.0309(6) Uani 1 1 d . . . . .
 H6AA H 0.5307 0.5261 0.5746 0.037 Uiso 1 1 calc R . . . .
 H6AB H 0.5967 0.4879 0.5307 0.037 Uiso 1 1 calc R . . . .
 C7A C 0.3678(2) 0.44735(17) 0.61255(19) 0.0575(10) Uani 1 1 d . . . . .
 H7AA H 0.3466 0.4177 0.6435 0.086 Uiso 1 1 calc GR . . . .
 H7AB H 0.3268 0.4499 0.5616 0.086 Uiso 1 1 calc GR . . . .
 H7AC H 0.3649 0.4810 0.6419 0.086 Uiso 1 1 calc GR . . . .
 C8A C 0.4880(3) 0.37557(12) 0.52747(18) 0.0498(9) Uani 1 1 d . . . . .
 H8AA H 0.5504 0.3702 0.5112 0.075 Uiso 1 1 calc GR . . . .
 H8AB H 0.4414 0.3818 0.4805 0.075 Uiso 1 1 calc GR . . . .
 H8AC H 0.4703 0.3436 0.5554 0.075 Uiso 1 1 calc GR . . . .
 C9A C 0.49293(17) 0.49231(10) 0.78078(16) 0.0276(5) Uani 1 1 d . . . . .
 H9AA H 0.4318 0.4739 0.7736 0.041 Uiso 1 1 calc GR . . . .
 H9AB H 0.4904 0.5230 0.7446 0.041 Uiso 1 1 calc GR . . . .
 H9AC H 0.5072 0.5049 0.8356 0.041 Uiso 1 1 calc GR . . . .
 C10A C 0.68006(18) 0.46537(10) 0.89739(14) 0.0268(5) Uani 1 1 d . . . . .
 H10D H 0.6230 0.4736 0.9209 0.040 Uiso 1 1 calc GR . . . .
 H10E H 0.7173 0.4981 0.8946 0.040 Uiso 1 1 calc GR . . . .
 H10F H 0.7177 0.4387 0.9302 0.040 Uiso 1 1 calc GR . . . .
 C11A C 0.81075(16) 0.39505(10) 0.80853(14) 0.0245(5) Uani 1 1 d . . . . .
 H11D H 0.8107 0.3810 0.8623 0.037 Uiso 1 1 calc GR . . . .
 H11E H 0.8522 0.4264 0.8105 0.037 Uiso 1 1 calc GR . . . .
 H11F H 0.8337 0.3673 0.7752 0.037 Uiso 1 1 calc GR . . . .
 C12A C 0.70744(17) 0.37293(10) 0.63238(14) 0.0252(5) Uani 1 1 d . . . . .
 H12D H 0.7729 0.3631 0.6518 0.038 Uiso 1 1 calc GR . . . .
 H12E H 0.7060 0.3967 0.5864 0.038 Uiso 1 1 calc GR . . . .
 H12F H 0.6709 0.3405 0.6169 0.038 Uiso 1 1 calc GR . . . .
 C13A C 0.56453(17) 0.28114(9) 0.71258(14) 0.0235(5) Uani 1 1 d . . . . .
 H13C H 0.5526 0.2931 0.6567 0.028 Uiso 1 1 calc R . . . .
 H13D H 0.6290 0.2658 0.7209 0.028 Uiso 1 1 calc R . . . .
 C14A C 0.5140(2) 0.16219(11) 0.67257(18) 0.0395(7) Uani 1 1 d . . . . .
 H14D H 0.5135 0.1690 0.6159 0.059 Uiso 1 1 calc GR . . . .
 H14E H 0.4680 0.1342 0.6798 0.059 Uiso 1 1 calc GR . . . .
 H14F H 0.5772 0.1505 0.6960 0.059 Uiso 1 1 calc GR . . . .
 C15A C 0.36101(19) 0.24563(12) 0.67548(19) 0.0405(7) Uani 1 1 d . . . . .
 H15D H 0.3447 0.2805 0.6965 0.061 Uiso 1 1 calc GR . . . .
 H15E H 0.3152 0.2187 0.6874 0.061 Uiso 1 1 calc GR . . . .
 H15F H 0.3598 0.2483 0.6180 0.061 Uiso 1 1 calc GR . . . .
 C16A C 0.4765(2) 0.20628(11) 0.82868(16) 0.0353(6) Uani 1 1 d . . . . .
 H16D H 0.5378 0.1920 0.8524 0.053 Uiso 1 1 calc GR . . . .
 H16E H 0.4278 0.1789 0.8304 0.053 Uiso 1 1 calc GR . . . .
 H16F H 0.4611 0.2379 0.8584 0.053 Uiso 1 1 calc GR . . . .
 C17A C 0.42450(16) 0.36237(10) 0.82041(14) 0.0246(5) Uani 1 1 d . . . . .
 H17C H 0.3920 0.3843 0.7765 0.030 Uiso 1 1 calc R . . . .
 H17D H 0.3991 0.3257 0.8102 0.030 Uiso 1 1 calc R . . . .
 C18A C 0.2561(2) 0.42388(15) 0.8727(2) 0.0518(8) Uani 1 1 d . . . . .
 H18D H 0.2296 0.4363 0.9195 0.078 Uiso 1 1 calc GR . . . .
 H18E H 0.2097 0.4013 0.8402 0.078 Uiso 1 1 calc GR . . . .
 H18F H 0.2716 0.4548 0.8416 0.078 Uiso 1 1 calc GR . . . .
 C19A C 0.3307(2) 0.32298(12) 0.95787(18) 0.0414(7) Uani 1 1 d . . . . .
 H19D H 0.3864 0.3005 0.9735 0.062 Uiso 1 1 calc GR . . . .
 H19E H 0.2836 0.3026 0.9226 0.062 Uiso 1 1 calc GR . . . .
 H19F H 0.3038 0.3339 1.0052 0.062 Uiso 1 1 calc GR . . . .
 C20A C 0.4400(2) 0.42722(11) 0.97919(17) 0.0373(6) Uani 1 1 d . . . . .
 H20D H 0.5007 0.4095 0.9960 0.056 Uiso 1 1 calc GR . . . .
 H20E H 0.4072 0.4328 1.0253 0.056 Uiso 1 1 calc GR . . . .
 H20F H 0.4509 0.4619 0.9551 0.056 Uiso 1 1 calc GR . . . .
 C21A C 0.71572(17) 0.27294(10) 0.88601(15) 0.0285(5) Uani 1 1 d . . . . .
 H21C H 0.7670 0.2851 0.8568 0.034 Uiso 1 1 calc R . . . .
 H21D H 0.6852 0.2410 0.8592 0.034 Uiso 1 1 calc R . . . .
 C22A C 0.7533(2) 0.26064(12) 0.97098(16) 0.0410(7) Uani 1 1 d . . . . .
 H22E H 0.8056 0.2851 0.9913 0.049 Uiso 1 1 calc R . . . .
 H22F H 0.7757 0.2231 0.9772 0.049 Uiso 1 1 calc R . . . .
 C23A C 0.6677(2) 0.26976(13) 1.01278(17) 0.0414(7) Uani 1 1 d . . . . .
 H23E H 0.6241 0.2388 1.0057 0.050 Uiso 1 1 calc R . . . .
 H23F H 0.6865 0.2762 1.0701 0.050 Uiso 1 1 calc R . . . .
 C24A C 0.62339(18) 0.31906(11) 0.97182(14) 0.0296(5) Uani 1 1 d . . . . .
 H24E H 0.5542 0.3190 0.9717 0.036 Uiso 1 1 calc R . . . .
 H24F H 0.6500 0.3520 0.9985 0.036 Uiso 1 1 calc R . . . .

loop_
  _atom_site_aniso_label
  _atom_site_aniso_U_11
  _atom_site_aniso_U_22
  _atom_site_aniso_U_33
  _atom_site_aniso_U_23
  _atom_site_aniso_U_13
  _atom_site_aniso_U_12
 Sc1 0.0182(2) 0.0200(2) 0.0170(2) 0.00093(15) 0.00074(15) -0.00190(15)
 Si1 0.0288(3) 0.0242(3) 0.0188(3) 0.0030(2) -0.0057(3) -0.0056(3)
 Si2 0.0235(3) 0.0346(4) 0.0265(4) -0.0045(3) 0.0072(3) -0.0027(3)
 Si3 0.0279(3) 0.0222(3) 0.0240(3) 0.0016(3) 0.0016(3) -0.0023(3)
 O1 0.0270(9) 0.0273(9) 0.0204(8) 0.0017(7) -0.0012(7) 0.0012(7)
 C1 0.0207(10) 0.0202(10) 0.0176(10) 0.0026(8) -0.0008(8) -0.0017(8)
 C2 0.0195(10) 0.0216(11) 0.0218(11) 0.0043(9) 0.0022(9) -0.0007(8)
 C3 0.0202(10) 0.0234(11) 0.0213(11) 0.0045(9) 0.0001(9) -0.0046(9)
 C4 0.0254(11) 0.0211(11) 0.0190(11) 0.0021(8) 0.0016(9) -0.0060(9)
 C5 0.0186(10) 0.0193(10) 0.0229(11) 0.0031(8) 0.0015(8) -0.0001(8)
 C6 0.0229(11) 0.0284(12) 0.0212(11) 0.0046(9) -0.0053(9) -0.0028(9)
 C7 0.066(2) 0.0336(15) 0.0235(13) -0.0045(11) -0.0064(13) 0.0036(14)
 C8 0.0380(15) 0.0462(17) 0.0324(14) 0.0143(12) -0.0122(12) -0.0198(13)
 C9 0.0274(12) 0.0302(13) 0.0339(14) 0.0003(11) 0.0113(11) 0.0009(10)
 C10 0.0226(12) 0.0393(14) 0.0303(13) 0.0110(11) -0.0054(10) -0.0067(10)
 C11 0.0379(14) 0.0287(13) 0.0221(12) -0.0008(10) 0.0020(10) -0.0079(10)
 C12 0.0273(12) 0.0229(12) 0.0338(14) 0.0008(10) 0.0039(10) 0.0036(9)
 C13 0.0254(12) 0.0289(12) 0.0234(12) -0.0016(9) 0.0037(9) -0.0041(9)
 C14 0.0329(14) 0.0412(16) 0.0355(15) -0.0113(12) 0.0089(12) -0.0015(12)
 C15 0.0285(14) 0.0541(19) 0.0507(19) -0.0081(15) 0.0130(13) -0.0070(13)
 C16 0.0437(17) 0.0520(18) 0.0300(14) 0.0032(13) 0.0135(13) -0.0012(14)
 C17 0.0258(12) 0.0241(11) 0.0215(11) 0.0003(9) 0.0023(9) 0.0001(9)
 C18 0.0342(14) 0.0320(14) 0.0319(14) 0.0029(11) -0.0071(11) -0.0069(11)
 C19 0.0372(15) 0.0416(16) 0.0302(14) 0.0122(12) 0.0019(12) -0.0034(12)
 C20 0.0544(19) 0.0275(14) 0.066(2) -0.0024(14) 0.0203(17) -0.0019(13)
 C21 0.0491(17) 0.0382(15) 0.0205(12) -0.0004(11) -0.0006(12) 0.0086(12)
 C22 0.068(2) 0.074(3) 0.0324(16) 0.0219(16) 0.0144(16) 0.0245(19)
 C23 0.031(6) 0.031(4) 0.022(4) 0.010(3) -0.007(3) 0.001(3)
 C23B 0.045(4) 0.049(3) 0.034(3) 0.009(2) -0.009(2) 0.014(3)
 C24 0.0364(15) 0.0389(16) 0.0444(17) -0.0026(13) -0.0136(13) 0.0132(12)
 Sc1A 0.01677(19) 0.0197(2) 0.01523(19) 0.00112(15) -0.00001(15) -0.00094(15)
 Si1A 0.0226(3) 0.0292(3) 0.0200(3) 0.0061(3) -0.0066(2) -0.0050(3)
 Si2A 0.0271(3) 0.0236(3) 0.0237(3) -0.0018(3) 0.0001(3) -0.0039(3)
 Si3A 0.0231(3) 0.0288(3) 0.0285(4) 0.0013(3) 0.0084(3) 0.0035(3)
 O1A 0.0236(8) 0.0267(8) 0.0200(8) 0.0034(6) 0.0007(6) 0.0045(7)
 C1A 0.0186(10) 0.0210(10) 0.0184(10) 0.0037(8) -0.0015(8) -0.0032(8)
 C2A 0.0193(10) 0.0181(10) 0.0222(11) 0.0025(8) 0.0010(9) -0.0013(8)
 C3A 0.0203(10) 0.0190(10) 0.0187(10) 0.0008(8) -0.0006(8) -0.0013(8)
 C4A 0.0159(10) 0.0211(10) 0.0170(10) 0.0027(8) -0.0002(8) -0.0022(8)
 C5A 0.0198(10) 0.0189(10) 0.0193(11) 0.0026(8) 0.0020(8) -0.0026(8)
 C6A 0.0346(14) 0.0322(13) 0.0216(12) 0.0093(10) -0.0111(10) -0.0101(11)
 C7A 0.0211(13) 0.113(3) 0.0354(17) 0.0249(18) -0.0077(12) 0.0008(16)
 C8A 0.071(2) 0.0346(15) 0.0330(15) 0.0026(12) -0.0299(15) -0.0086(15)
 C9A 0.0238(12) 0.0249(12) 0.0338(14) 0.0025(10) 0.0034(10) 0.0047(9)
 C10A 0.0283(12) 0.0297(12) 0.0212(11) -0.0045(9) -0.0010(10) -0.0025(10)
 C11A 0.0184(11) 0.0295(12) 0.0241(12) 0.0027(9) -0.0025(9) 0.0004(9)
 C12A 0.0258(12) 0.0282(12) 0.0218(11) 0.0001(9) 0.0045(9) -0.0039(9)
 C13A 0.0263(12) 0.0250(11) 0.0189(11) 0.0006(9) 0.0018(9) -0.0012(9)
 C14A 0.0472(17) 0.0280(14) 0.0440(17) -0.0071(12) 0.0083(14) -0.0042(12)
 C15A 0.0310(14) 0.0386(15) 0.0474(17) -0.0086(13) -0.0103(12) -0.0027(12)
 C16A 0.0379(15) 0.0352(14) 0.0334(14) 0.0052(11) 0.0066(12) -0.0061(12)
 C17A 0.0211(11) 0.0277(12) 0.0248(12) 0.0013(9) 0.0022(9) 0.0001(9)
 C18A 0.0372(16) 0.062(2) 0.058(2) 0.0028(17) 0.0112(15) 0.0217(15)
 C19A 0.0512(18) 0.0393(16) 0.0383(16) -0.0003(13) 0.0227(14) -0.0069(13)
 C20A 0.0459(16) 0.0345(15) 0.0328(15) -0.0065(11) 0.0096(12) 0.0053(12)
 C21A 0.0250(12) 0.0290(13) 0.0302(13) 0.0008(10) -0.0013(10) 0.0084(10)
 C22A 0.0442(16) 0.0418(16) 0.0320(15) -0.0021(12) -0.0118(13) 0.0175(13)
 C23A 0.0482(17) 0.0488(17) 0.0253(14) 0.0135(12) -0.0016(12) 0.0053(14)
 C24A 0.0298(13) 0.0407(14) 0.0184(11) 0.0042(10) 0.0033(10) 0.0052(11)

_geom_special_details
;
 All esds (except the esd in the dihedral angle between two l.s. planes)
 are estimated using the full covariance matrix.  The cell esds are taken
 into account individually in the estimation of esds in distances, angles
 and torsion angles; correlations between esds in cell parameters are only
 used when they are defined by crystal symmetry.  An approximate (isotropic)
 treatment of cell esds is used for estimating esds involving l.s. planes.
;
loop_
  _geom_bond_atom_site_label_1
  _geom_bond_atom_site_label_2
  _geom_bond_distance
  _geom_bond_site_symmetry_2
  _geom_bond_publ_flag
 Sc1 O1 2.1660(16) . ?
 Sc1 C1 2.447(2) . ?
 Sc1 C2 2.483(2) . ?
 Sc1 C3 2.519(2) . ?
 Sc1 C4 2.517(2) . ?
 Sc1 C5 2.487(2) . ?
 Sc1 C13 2.223(2) . ?
 Sc1 C17 2.244(2) . ?
 Si1 C1 1.870(2) . ?
 Si1 C6 1.869(2) . ?
 Si1 C7 1.868(3) . ?
 Si1 C8 1.873(3) . ?
 Si2 C13 1.844(3) . ?
 Si2 C14 1.877(3) . ?
 Si2 C15 1.885(3) . ?
 Si2 C16 1.883(3) . ?
 Si3 C17 1.843(2) . ?
 Si3 C18 1.881(3) . ?
 Si3 C19 1.879(3) . ?
 Si3 C20 1.874(3) . ?
 O1 C21 1.455(3) . ?
 O1 C24 1.444(3) . ?
 C1 C2 1.439(3) . ?
 C1 C5 1.436(3) . ?
 C2 C3 1.411(3) . ?
 C2 C9 1.501(3) . ?
 C3 C4 1.418(3) . ?
 C3 C10 1.506(3) . ?
 C4 C5 1.410(3) . ?
 C4 C11 1.505(3) . ?
 C5 C12 1.498(3) . ?
 C6 C6 1.542(5) 3_767 ?
 C6 H6A 0.9900 . ?
 C6 H6B 0.9900 . ?
 C7 H7A 0.9800 . ?
 C7 H7B 0.9800 . ?
 C7 H7C 0.9800 . ?
 C8 H8A 0.9800 . ?
 C8 H8B 0.9800 . ?
 C8 H8C 0.9800 . ?
 C9 H9A 0.9800 . ?
 C9 H9B 0.9800 . ?
 C9 H9C 0.9800 . ?
 C10 H10A 0.9800 . ?
 C10 H10B 0.9800 . ?
 C10 H10C 0.9800 . ?
 C11 H11A 0.9800 . ?
 C11 H11B 0.9800 . ?
 C11 H11C 0.9800 . ?
 C12 H12A 0.9800 . ?
 C12 H12B 0.9800 . ?
 C12 H12C 0.9800 . ?
 C13 H13A 0.9900 . ?
 C13 H13B 0.9900 . ?
 C14 H14A 0.9800 . ?
 C14 H14B 0.9800 . ?
 C14 H14C 0.9800 . ?
 C15 H15A 0.9800 . ?
 C15 H15B 0.9800 . ?
 C15 H15C 0.9800 . ?
 C16 H16A 0.9800 . ?
 C16 H16B 0.9800 . ?
 C16 H16C 0.9800 . ?
 C17 H17A 0.9900 . ?
 C17 H17B 0.9900 . ?
 C18 H18A 0.9800 . ?
 C18 H18B 0.9800 . ?
 C18 H18C 0.9800 . ?
 C19 H19A 0.9800 . ?
 C19 H19B 0.9800 . ?
 C19 H19C 0.9800 . ?
 C20 H20A 0.9800 . ?
 C20 H20B 0.9800 . ?
 C20 H20C 0.9800 . ?
 C21 H21A 0.9900 . ?
 C21 H21B 0.9900 . ?
 C21 C22 1.514(4) . ?
 C22 H22A 0.9900 . ?
 C22 H22B 0.9900 . ?
 C22 H22C 0.9900 . ?
 C22 H22D 0.9900 . ?
 C22 C23 1.312(9) . ?
 C22 C23B 1.505(7) . ?
 C23 H23A 0.9900 . ?
 C23 H23B 0.9900 . ?
 C23 C24 1.727(10) . ?
 C23B H23C 0.9900 . ?
 C23B H23D 0.9900 . ?
 C23B C24 1.452(5) . ?
 C24 H24A 0.9900 . ?
 C24 H24B 0.9900 . ?
 C24 H24C 0.9900 . ?
 C24 H24D 0.9900 . ?
 Sc1A O1A 2.1760(16) . ?
 Sc1A C1A 2.464(2) . ?
 Sc1A C2A 2.502(2) . ?
 Sc1A C3A 2.521(2) . ?
 Sc1A C4A 2.522(2) . ?
 Sc1A C5A 2.501(2) . ?
 Sc1A C13A 2.243(2) . ?
 Sc1A C17A 2.210(2) . ?
 Si1A C1A 1.870(2) . ?
 Si1A C6A 1.871(2) . ?
 Si1A C7A 1.863(3) . ?
 Si1A C8A 1.871(3) . ?
 Si2A C13A 1.842(2) . ?
 Si2A C14A 1.882(3) . ?
 Si2A C15A 1.876(3) . ?
 Si2A C16A 1.882(3) . ?
 Si3A C17A 1.845(3) . ?
 Si3A C18A 1.874(3) . ?
 Si3A C19A 1.873(3) . ?
 Si3A C20A 1.877(3) . ?
 O1A C21A 1.467(3) . ?
 O1A C24A 1.470(3) . ?
 C1A C2A 1.440(3) . ?
 C1A C5A 1.435(3) . ?
 C2A C3A 1.410(3) . ?
 C2A C9A 1.512(3) . ?
 C3A C4A 1.422(3) . ?
 C3A C10A 1.507(3) . ?
 C4A C5A 1.412(3) . ?
 C4A C11A 1.504(3) . ?
 C5A C12A 1.506(3) . ?
 C6A C6A 1.555(4) 3_666 ?
 C6A H6AA 0.9900 . ?
 C6A H6AB 0.9900 . ?
 C7A H7AA 0.9800 . ?
 C7A H7AB 0.9800 . ?
 C7A H7AC 0.9800 . ?
 C8A H8AA 0.9800 . ?
 C8A H8AB 0.9800 . ?
 C8A H8AC 0.9800 . ?
 C9A H9AA 0.9800 . ?
 C9A H9AB 0.9800 . ?
 C9A H9AC 0.9800 . ?
 C10A H10D 0.9800 . ?
 C10A H10E 0.9800 . ?
 C10A H10F 0.9800 . ?
 C11A H11D 0.9800 . ?
 C11A H11E 0.9800 . ?
 C11A H11F 0.9800 . ?
 C12A H12D 0.9800 . ?
 C12A H12E 0.9800 . ?
 C12A H12F 0.9800 . ?
 C13A H13C 0.9900 . ?
 C13A H13D 0.9900 . ?
 C14A H14D 0.9800 . ?
 C14A H14E 0.9800 . ?
 C14A H14F 0.9800 . ?
 C15A H15D 0.9800 . ?
 C15A H15E 0.9800 . ?
 C15A H15F 0.9800 . ?
 C16A H16D 0.9800 . ?
 C16A H16E 0.9800 . ?
 C16A H16F 0.9800 . ?
 C17A H17C 0.9900 . ?
 C17A H17D 0.9900 . ?
 C18A H18D 0.9800 . ?
 C18A H18E 0.9800 . ?
 C18A H18F 0.9800 . ?
 C19A H19D 0.9800 . ?
 C19A H19E 0.9800 . ?
 C19A H19F 0.9800 . ?
 C20A H20D 0.9800 . ?
 C20A H20E 0.9800 . ?
 C20A H20F 0.9800 . ?
 C21A H21C 0.9900 . ?
 C21A H21D 0.9900 . ?
 C21A C22A 1.504(4) . ?
 C22A H22E 0.9900 . ?
 C22A H22F 0.9900 . ?
 C22A C23A 1.517(4) . ?
 C23A H23E 0.9900 . ?
 C23A H23F 0.9900 . ?
 C23A C24A 1.510(4) . ?
 C24A H24E 0.9900 . ?
 C24A H24F 0.9900 . ?

loop_
  _geom_angle_atom_site_label_1
  _geom_angle_atom_site_label_2
  _geom_angle_atom_site_label_3
  _geom_angle
  _geom_angle_site_symmetry_1
  _geom_angle_site_symmetry_3
  _geom_angle_publ_flag
 O1 Sc1 C1 141.48(7) . . ?
 O1 Sc1 C2 110.44(7) . . ?
 O1 Sc1 C3 86.12(7) . . ?
 O1 Sc1 C4 94.94(7) . . ?
 O1 Sc1 C5 126.99(7) . . ?
 O1 Sc1 C13 102.50(8) . . ?
 O1 Sc1 C17 95.46(8) . . ?
 C1 Sc1 C2 33.92(7) . . ?
 C1 Sc1 C3 55.52(7) . . ?
 C1 Sc1 C4 55.49(7) . . ?
 C1 Sc1 C5 33.82(7) . . ?
 C2 Sc1 C3 32.77(7) . . ?
 C2 Sc1 C4 54.54(8) . . ?
 C2 Sc1 C5 55.12(7) . . ?
 C4 Sc1 C3 32.70(8) . . ?
 C5 Sc1 C3 54.48(7) . . ?
 C5 Sc1 C4 32.72(7) . . ?
 C13 Sc1 C1 108.53(8) . . ?
 C13 Sc1 C2 141.99(8) . . ?
 C13 Sc1 C3 137.93(9) . . ?
 C13 Sc1 C4 105.23(9) . . ?
 C13 Sc1 C5 90.00(8) . . ?
 C13 Sc1 C17 105.63(9) . . ?
 C17 Sc1 C1 97.55(8) . . ?
 C17 Sc1 C2 89.89(8) . . ?
 C17 Sc1 C3 114.53(9) . . ?
 C17 Sc1 C4 144.32(8) . . ?
 C17 Sc1 C5 130.64(8) . . ?
 C1 Si1 C8 112.66(12) . . ?
 C6 Si1 C1 108.42(10) . . ?
 C6 Si1 C8 108.39(12) . . ?
 C7 Si1 C1 113.31(12) . . ?
 C7 Si1 C6 106.99(13) . . ?
 C7 Si1 C8 106.82(15) . . ?
 C13 Si2 C14 113.09(12) . . ?
 C13 Si2 C15 112.02(13) . . ?
 C13 Si2 C16 111.46(13) . . ?
 C14 Si2 C15 106.39(14) . . ?
 C14 Si2 C16 107.01(14) . . ?
 C16 Si2 C15 106.46(15) . . ?
 C17 Si3 C18 109.93(11) . . ?
 C17 Si3 C19 112.97(12) . . ?
 C17 Si3 C20 113.21(13) . . ?
 C19 Si3 C18 107.07(13) . . ?
 C20 Si3 C18 107.21(14) . . ?
 C20 Si3 C19 106.08(15) . . ?
 C21 O1 Sc1 122.71(14) . . ?
 C24 O1 Sc1 129.67(15) . . ?
 C24 O1 C21 107.59(19) . . ?
 Si1 C1 Sc1 120.96(10) . . ?
 C2 C1 Sc1 74.42(12) . . ?
 C2 C1 Si1 129.55(18) . . ?
 C5 C1 Sc1 74.61(13) . . ?
 C5 C1 Si1 123.90(16) . . ?
 C5 C1 C2 106.28(19) . . ?
 C1 C2 Sc1 71.66(13) . . ?
 C1 C2 C9 126.5(2) . . ?
 C3 C2 Sc1 74.99(13) . . ?
 C3 C2 C1 108.6(2) . . ?
 C3 C2 C9 124.8(2) . . ?
 C9 C2 Sc1 122.79(16) . . ?
 C2 C3 Sc1 72.24(13) . . ?
 C2 C3 C4 108.18(19) . . ?
 C2 C3 C10 126.4(2) . . ?
 C4 C3 Sc1 73.59(13) . . ?
 C4 C3 C10 125.3(2) . . ?
 C10 C3 Sc1 123.15(15) . . ?
 C3 C4 Sc1 73.71(13) . . ?
 C3 C4 C11 126.0(2) . . ?
 C5 C4 Sc1 72.47(13) . . ?
 C5 C4 C3 108.3(2) . . ?
 C5 C4 C11 125.5(2) . . ?
 C11 C4 Sc1 123.60(16) . . ?
 C1 C5 Sc1 71.57(12) . . ?
 C1 C5 C12 127.0(2) . . ?
 C4 C5 Sc1 74.81(13) . . ?
 C4 C5 C1 108.7(2) . . ?
 C4 C5 C12 124.0(2) . . ?
 C12 C5 Sc1 124.65(16) . . ?
 Si1 C6 H6A 109.0 . . ?
 Si1 C6 H6B 109.0 . . ?
 C6 C6 Si1 112.8(2) 3_767 . ?
 C6 C6 H6A 109.0 3_767 . ?
 C6 C6 H6B 109.0 3_767 . ?
 H6A C6 H6B 107.8 . . ?
 Si1 C7 H7A 109.5 . . ?
 Si1 C7 H7B 109.5 . . ?
 Si1 C7 H7C 109.5 . . ?
 H7A C7 H7B 109.5 . . ?
 H7A C7 H7C 109.5 . . ?
 H7B C7 H7C 109.5 . . ?
 Si1 C8 H8A 109.5 . . ?
 Si1 C8 H8B 109.5 . . ?
 Si1 C8 H8C 109.5 . . ?
 H8A C8 H8B 109.5 . . ?
 H8A C8 H8C 109.5 . . ?
 H8B C8 H8C 109.5 . . ?
 C2 C9 H9A 109.5 . . ?
 C2 C9 H9B 109.5 . . ?
 C2 C9 H9C 109.5 . . ?
 H9A C9 H9B 109.5 . . ?
 H9A C9 H9C 109.5 . . ?
 H9B C9 H9C 109.5 . . ?
 C3 C10 H10A 109.5 . . ?
 C3 C10 H10B 109.5 . . ?
 C3 C10 H10C 109.5 . . ?
 H10A C10 H10B 109.5 . . ?
 H10A C10 H10C 109.5 . . ?
 H10B C10 H10C 109.5 . . ?
 C4 C11 H11A 109.5 . . ?
 C4 C11 H11B 109.5 . . ?
 C4 C11 H11C 109.5 . . ?
 H11A C11 H11B 109.5 . . ?
 H11A C11 H11C 109.5 . . ?
 H11B C11 H11C 109.5 . . ?
 C5 C12 H12A 109.5 . . ?
 C5 C12 H12B 109.5 . . ?
 C5 C12 H12C 109.5 . . ?
 H12A C12 H12B 109.5 . . ?
 H12A C12 H12C 109.5 . . ?
 H12B C12 H12C 109.5 . . ?
 Sc1 C13 H13A 101.5 . . ?
 Sc1 C13 H13B 101.5 . . ?
 Si2 C13 Sc1 141.79(13) . . ?
 Si2 C13 H13A 101.5 . . ?
 Si2 C13 H13B 101.5 . . ?
 H13A C13 H13B 104.6 . . ?
 Si2 C14 H14A 109.5 . . ?
 Si2 C14 H14B 109.5 . . ?
 Si2 C14 H14C 109.5 . . ?
 H14A C14 H14B 109.5 . . ?
 H14A C14 H14C 109.5 . . ?
 H14B C14 H14C 109.5 . . ?
 Si2 C15 H15A 109.5 . . ?
 Si2 C15 H15B 109.5 . . ?
 Si2 C15 H15C 109.5 . . ?
 H15A C15 H15B 109.5 . . ?
 H15A C15 H15C 109.5 . . ?
 H15B C15 H15C 109.5 . . ?
 Si2 C16 H16A 109.5 . . ?
 Si2 C16 H16B 109.5 . . ?
 Si2 C16 H16C 109.5 . . ?
 H16A C16 H16B 109.5 . . ?
 H16A C16 H16C 109.5 . . ?
 H16B C16 H16C 109.5 . . ?
 Sc1 C17 H17A 106.5 . . ?
 Sc1 C17 H17B 106.5 . . ?
 Si3 C17 Sc1 123.47(12) . . ?
 Si3 C17 H17A 106.5 . . ?
 Si3 C17 H17B 106.5 . . ?
 H17A C17 H17B 106.5 . . ?
 Si3 C18 H18A 109.5 . . ?
 Si3 C18 H18B 109.5 . . ?
 Si3 C18 H18C 109.5 . . ?
 H18A C18 H18B 109.5 . . ?
 H18A C18 H18C 109.5 . . ?
 H18B C18 H18C 109.5 . . ?
 Si3 C19 H19A 109.5 . . ?
 Si3 C19 H19B 109.5 . . ?
 Si3 C19 H19C 109.5 . . ?
 H19A C19 H19B 109.5 . . ?
 H19A C19 H19C 109.5 . . ?
 H19B C19 H19C 109.5 . . ?
 Si3 C20 H20A 109.5 . . ?
 Si3 C20 H20B 109.5 . . ?
 Si3 C20 H20C 109.5 . . ?
 H20A C20 H20B 109.5 . . ?
 H20A C20 H20C 109.5 . . ?
 H20B C20 H20C 109.5 . . ?
 O1 C21 H21A 111.0 . . ?
 O1 C21 H21B 111.0 . . ?
 O1 C21 C22 103.8(2) . . ?
 H21A C21 H21B 109.0 . . ?
 C22 C21 H21A 111.0 . . ?
 C22 C21 H21B 111.0 . . ?
 C21 C22 H22A 109.2 . . ?
 C21 C22 H22B 109.2 . . ?
 C21 C22 H22C 111.3 . . ?
 C21 C22 H22D 111.3 . . ?
 H22A C22 H22B 107.9 . . ?
 H22C C22 H22D 109.2 . . ?
 C23 C22 C21 112.0(4) . . ?
 C23 C22 H22A 109.2 . . ?
 C23 C22 H22B 109.2 . . ?
 C23B C22 C21 102.3(3) . . ?
 C23B C22 H22C 111.3 . . ?
 C23B C22 H22D 111.3 . . ?
 C22 C23 H23A 111.5 . . ?
 C22 C23 H23B 111.5 . . ?
 C22 C23 C24 101.5(6) . . ?
 H23A C23 H23B 109.3 . . ?
 C24 C23 H23A 111.5 . . ?
 C24 C23 H23B 111.5 . . ?
 C22 C23B H23C 110.4 . . ?
 C22 C23B H23D 110.4 . . ?
 H23C C23B H23D 108.6 . . ?
 C24 C23B C22 106.4(3) . . ?
 C24 C23B H23C 110.4 . . ?
 C24 C23B H23D 110.4 . . ?
 O1 C24 C23 95.7(4) . . ?
 O1 C24 C23B 107.9(3) . . ?
 O1 C24 H24A 112.6 . . ?
 O1 C24 H24B 112.6 . . ?
 O1 C24 H24C 110.1 . . ?
 O1 C24 H24D 110.1 . . ?
 C23 C24 H24A 112.6 . . ?
 C23 C24 H24B 112.6 . . ?
 C23B C24 H24C 110.1 . . ?
 C23B C24 H24D 110.1 . . ?
 H24A C24 H24B 110.1 . . ?
 H24C C24 H24D 108.4 . . ?
 O1A Sc1A C1A 144.20(7) . . ?
 O1A Sc1A C2A 124.34(7) . . ?
 O1A Sc1A C3A 93.65(7) . . ?
 O1A Sc1A C4A 89.16(7) . . ?
 O1A Sc1A C5A 115.88(7) . . ?
 O1A Sc1A C13A 93.36(8) . . ?
 O1A Sc1A C17A 103.19(8) . . ?
 C1A Sc1A C2A 33.71(7) . . ?
 C1A Sc1A C3A 55.26(7) . . ?
 C1A Sc1A C4A 55.20(7) . . ?
 C1A Sc1A C5A 33.59(7) . . ?
 C2A Sc1A C3A 32.59(7) . . ?
 C2A Sc1A C4A 54.32(7) . . ?
 C3A Sc1A C4A 32.75(7) . . ?
 C5A Sc1A C2A 54.85(7) . . ?
 C5A Sc1A C3A 54.41(7) . . ?
 C5A Sc1A C4A 32.65(7) . . ?
 C13A Sc1A C1A 102.00(8) . . ?
 C13A Sc1A C2A 135.63(8) . . ?
 C13A Sc1A C3A 142.72(8) . . ?
 C13A Sc1A C4A 110.91(8) . . ?
 C13A Sc1A C5A 89.86(8) . . ?
 C17A Sc1A C1A 103.59(8) . . ?
 C17A Sc1A C2A 89.31(8) . . ?
 C17A Sc1A C3A 108.65(8) . . ?
 C17A Sc1A C4A 140.94(8) . . ?
 C17A Sc1A C5A 137.18(8) . . ?
 C17A Sc1A C13A 105.25(9) . . ?
 C1A Si1A C6A 108.31(10) . . ?
 C1A Si1A C8A 113.67(12) . . ?
 C7A Si1A C1A 112.50(12) . . ?
 C7A Si1A C6A 107.87(15) . . ?
 C7A Si1A C8A 106.58(18) . . ?
 C8A Si1A C6A 107.67(14) . . ?
 C13A Si2A C14A 113.10(12) . . ?
 C13A Si2A C15A 108.89(12) . . ?
 C13A Si2A C16A 113.30(12) . . ?
 C14A Si2A C16A 105.43(13) . . ?
 C15A Si2A C14A 107.31(13) . . ?
 C15A Si2A C16A 108.55(14) . . ?
 C17A Si3A C18A 112.40(14) . . ?
 C17A Si3A C19A 108.70(12) . . ?
 C17A Si3A C20A 114.64(12) . . ?
 C18A Si3A C20A 105.28(15) . . ?
 C19A Si3A C18A 107.68(16) . . ?
 C19A Si3A C20A 107.83(14) . . ?
 C21A O1A Sc1A 124.14(14) . . ?
 C21A O1A C24A 109.38(17) . . ?
 C24A O1A Sc1A 125.07(14) . . ?
 Si1A C1A Sc1A 125.84(10) . . ?
 C2A C1A Sc1A 74.59(12) . . ?
 C2A C1A Si1A 126.50(17) . . ?
 C5A C1A Sc1A 74.60(12) . . ?
 C5A C1A Si1A 125.83(17) . . ?
 C5A C1A C2A 106.51(18) . . ?
 C1A C2A Sc1A 71.70(12) . . ?
 C1A C2A C9A 126.8(2) . . ?
 C3A C2A Sc1A 74.45(12) . . ?
 C3A C2A C1A 108.48(19) . . ?
 C3A C2A C9A 124.4(2) . . ?
 C9A C2A Sc1A 124.75(15) . . ?
 C2A C3A Sc1A 72.95(12) . . ?
 C2A C3A C4A 108.20(19) . . ?
 C2A C3A C10A 127.2(2) . . ?
 C4A C3A Sc1A 73.67(12) . . ?
 C4A C3A C10A 124.4(2) . . ?
 C10A C3A Sc1A 123.18(16) . . ?
 C3A C4A Sc1A 73.58(12) . . ?
 C3A C4A C11A 123.7(2) . . ?
 C5A C4A Sc1A 72.83(12) . . ?
 C5A C4A C3A 108.23(19) . . ?
 C5A C4A C11A 127.9(2) . . ?
 C11A C4A Sc1A 123.60(15) . . ?
 C1A C5A Sc1A 71.81(12) . . ?
 C1A C5A C12A 126.2(2) . . ?
 C4A C5A Sc1A 74.52(12) . . ?
 C4A C5A C1A 108.5(2) . . ?
 C4A C5A C12A 125.2(2) . . ?
 C12A C5A Sc1A 123.25(15) . . ?
 Si1A C6A H6AA 108.6 . . ?
 Si1A C6A H6AB 108.6 . . ?
 C6A C6A Si1A 114.6(2) 3_666 . ?
 C6A C6A H6AA 108.6 3_666 . ?
 C6A C6A H6AB 108.6 3_666 . ?
 H6AA C6A H6AB 107.6 . . ?
 Si1A C7A H7AA 109.5 . . ?
 Si1A C7A H7AB 109.5 . . ?
 Si1A C7A H7AC 109.5 . . ?
 H7AA C7A H7AB 109.5 . . ?
 H7AA C7A H7AC 109.5 . . ?
 H7AB C7A H7AC 109.5 . . ?
 Si1A C8A H8AA 109.5 . . ?
 Si1A C8A H8AB 109.5 . . ?
 Si1A C8A H8AC 109.5 . . ?
 H8AA C8A H8AB 109.5 . . ?
 H8AA C8A H8AC 109.5 . . ?
 H8AB C8A H8AC 109.5 . . ?
 C2A C9A H9AA 109.5 . . ?
 C2A C9A H9AB 109.5 . . ?
 C2A C9A H9AC 109.5 . . ?
 H9AA C9A H9AB 109.5 . . ?
 H9AA C9A H9AC 109.5 . . ?
 H9AB C9A H9AC 109.5 . . ?
 C3A C10A H10D 109.5 . . ?
 C3A C10A H10E 109.5 . . ?
 C3A C10A H10F 109.5 . . ?
 H10D C10A H10E 109.5 . . ?
 H10D C10A H10F 109.5 . . ?
 H10E C10A H10F 109.5 . . ?
 C4A C11A H11D 109.5 . . ?
 C4A C11A H11E 109.5 . . ?
 C4A C11A H11F 109.5 . . ?
 H11D C11A H11E 109.5 . . ?
 H11D C11A H11F 109.5 . . ?
 H11E C11A H11F 109.5 . . ?
 C5A C12A H12D 109.5 . . ?
 C5A C12A H12E 109.5 . . ?
 C5A C12A H12F 109.5 . . ?
 H12D C12A H12E 109.5 . . ?
 H12D C12A H12F 109.5 . . ?
 H12E C12A H12F 109.5 . . ?
 Sc1A C13A H13C 106.8 . . ?
 Sc1A C13A H13D 106.8 . . ?
 Si2A C13A Sc1A 122.03(12) . . ?
 Si2A C13A H13C 106.8 . . ?
 Si2A C13A H13D 106.8 . . ?
 H13C C13A H13D 106.7 . . ?
 Si2A C14A H14D 109.5 . . ?
 Si2A C14A H14E 109.5 . . ?
 Si2A C14A H14F 109.5 . . ?
 H14D C14A H14E 109.5 . . ?
 H14D C14A H14F 109.5 . . ?
 H14E C14A H14F 109.5 . . ?
 Si2A C15A H15D 109.5 . . ?
 Si2A C15A H15E 109.5 . . ?
 Si2A C15A H15F 109.5 . . ?
 H15D C15A H15E 109.5 . . ?
 H15D C15A H15F 109.5 . . ?
 H15E C15A H15F 109.5 . . ?
 Si2A C16A H16D 109.5 . . ?
 Si2A C16A H16E 109.5 . . ?
 Si2A C16A H16F 109.5 . . ?
 H16D C16A H16E 109.5 . . ?
 H16D C16A H16F 109.5 . . ?
 H16E C16A H16F 109.5 . . ?
 Sc1A C17A H17C 102.2 . . ?
 Sc1A C17A H17D 102.2 . . ?
 Si3A C17A Sc1A 139.56(13) . . ?
 Si3A C17A H17C 102.2 . . ?
 Si3A C17A H17D 102.2 . . ?
 H17C C17A H17D 104.8 . . ?
 Si3A C18A H18D 109.5 . . ?
 Si3A C18A H18E 109.5 . . ?
 Si3A C18A H18F 109.5 . . ?
 H18D C18A H18E 109.5 . . ?
 H18D C18A H18F 109.5 . . ?
 H18E C18A H18F 109.5 . . ?
 Si3A C19A H19D 109.5 . . ?
 Si3A C19A H19E 109.5 . . ?
 Si3A C19A H19F 109.5 . . ?
 H19D C19A H19E 109.5 . . ?
 H19D C19A H19F 109.5 . . ?
 H19E C19A H19F 109.5 . . ?
 Si3A C20A H20D 109.5 . . ?
 Si3A C20A H20E 109.5 . . ?
 Si3A C20A H20F 109.5 . . ?
 H20D C20A H20E 109.5 . . ?
 H20D C20A H20F 109.5 . . ?
 H20E C20A H20F 109.5 . . ?
 O1A C21A H21C 110.8 . . ?
 O1A C21A H21D 110.8 . . ?
 O1A C21A C22A 104.5(2) . . ?
 H21C C21A H21D 108.9 . . ?
 C22A C21A H21C 110.8 . . ?
 C22A C21A H21D 110.8 . . ?
 C21A C22A H22E 111.3 . . ?
 C21A C22A H22F 111.3 . . ?
 C21A C22A C23A 102.6(2) . . ?
 H22E C22A H22F 109.2 . . ?
 C23A C22A H22E 111.3 . . ?
 C23A C22A H22F 111.3 . . ?
 C22A C23A H23E 111.2 . . ?
 C22A C23A H23F 111.2 . . ?
 H23E C23A H23F 109.1 . . ?
 C24A C23A C22A 102.7(2) . . ?
 C24A C23A H23E 111.2 . . ?
 C24A C23A H23F 111.2 . . ?
 O1A C24A C23A 104.8(2) . . ?
 O1A C24A H24E 110.8 . . ?
 O1A C24A H24F 110.8 . . ?
 C23A C24A H24E 110.8 . . ?
 C23A C24A H24F 110.8 . . ?
 H24E C24A H24F 108.9 . . ?

loop_
  _geom_torsion_atom_site_label_1
  _geom_torsion_atom_site_label_2
  _geom_torsion_atom_site_label_3
  _geom_torsion_atom_site_label_4
  _geom_torsion
  _geom_torsion_site_symmetry_1
  _geom_torsion_site_symmetry_2
  _geom_torsion_site_symmetry_3
  _geom_torsion_site_symmetry_4
  _geom_torsion_publ_flag
 Sc1 O1 C21 C22 -148.7(2) . . . . ?
 Sc1 O1 C24 C23 137.4(4) . . . . ?
 Sc1 O1 C24 C23B 165.7(4) . . . . ?
 Sc1 C1 C2 C3 66.48(16) . . . . ?
 Sc1 C1 C2 C9 -117.7(2) . . . . ?
 Sc1 C1 C5 C4 -66.17(16) . . . . ?
 Sc1 C1 C5 C12 119.9(2) . . . . ?
 Sc1 C2 C3 C4 65.33(16) . . . . ?
 Sc1 C2 C3 C10 -118.5(2) . . . . ?
 Sc1 C3 C4 C5 64.73(16) . . . . ?
 Sc1 C3 C4 C11 -120.0(2) . . . . ?
 Sc1 C4 C5 C1 64.06(15) . . . . ?
 Sc1 C4 C5 C12 -121.8(2) . . . . ?
 Si1 C1 C2 Sc1 117.54(19) . . . . ?
 Si1 C1 C2 C3 -175.99(17) . . . . ?
 Si1 C1 C2 C9 -0.1(4) . . . . ?
 Si1 C1 C5 Sc1 -117.25(17) . . . . ?
 Si1 C1 C5 C4 176.59(16) . . . . ?
 Si1 C1 C5 C12 2.7(3) . . . . ?
 O1 C21 C22 C23 0.9(7) . . . . ?
 O1 C21 C22 C23B -34.5(4) . . . . ?
 C1 Si1 C6 C6 -54.4(3) . . . 3_767 ?
 C1 C2 C3 Sc1 -64.30(15) . . . . ?
 C1 C2 C3 C4 1.0(3) . . . . ?
 C1 C2 C3 C10 177.2(2) . . . . ?
 C2 C1 C5 Sc1 68.24(15) . . . . ?
 C2 C1 C5 C4 2.1(2) . . . . ?
 C2 C1 C5 C12 -171.8(2) . . . . ?
 C2 C3 C4 Sc1 -64.44(16) . . . . ?
 C2 C3 C4 C5 0.3(3) . . . . ?
 C2 C3 C4 C11 175.5(2) . . . . ?
 C3 C4 C5 Sc1 -65.54(16) . . . . ?
 C3 C4 C5 C1 -1.5(3) . . . . ?
 C3 C4 C5 C12 172.6(2) . . . . ?
 C5 C1 C2 Sc1 -68.38(15) . . . . ?
 C5 C1 C2 C3 -1.9(2) . . . . ?
 C5 C1 C2 C9 173.9(2) . . . . ?
 C6 Si1 C1 Sc1 -150.96(12) . . . . ?
 C6 Si1 C1 C2 113.9(2) . . . . ?
 C6 Si1 C1 C5 -59.2(2) . . . . ?
 C7 Si1 C1 Sc1 90.43(16) . . . . ?
 C7 Si1 C1 C2 -4.7(3) . . . . ?
 C7 Si1 C1 C5 -177.84(19) . . . . ?
 C7 Si1 C6 C6 68.2(3) . . . 3_767 ?
 C8 Si1 C1 Sc1 -30.99(18) . . . . ?
 C8 Si1 C1 C2 -126.1(2) . . . . ?
 C8 Si1 C1 C5 60.7(2) . . . . ?
 C8 Si1 C6 C6 -176.9(2) . . . 3_767 ?
 C9 C2 C3 Sc1 119.8(2) . . . . ?
 C9 C2 C3 C4 -174.9(2) . . . . ?
 C9 C2 C3 C10 1.3(4) . . . . ?
 C10 C3 C4 Sc1 119.3(2) . . . . ?
 C10 C3 C4 C5 -175.9(2) . . . . ?
 C10 C3 C4 C11 -0.7(4) . . . . ?
 C11 C4 C5 Sc1 119.2(2) . . . . ?
 C11 C4 C5 C1 -176.8(2) . . . . ?
 C11 C4 C5 C12 -2.6(4) . . . . ?
 C14 Si2 C13 Sc1 -63.8(2) . . . . ?
 C15 Si2 C13 Sc1 176.0(2) . . . . ?
 C16 Si2 C13 Sc1 56.8(3) . . . . ?
 C18 Si3 C17 Sc1 -77.34(17) . . . . ?
 C19 Si3 C17 Sc1 42.18(18) . . . . ?
 C20 Si3 C17 Sc1 162.79(16) . . . . ?
 C21 O1 C24 C23 -40.9(4) . . . . ?
 C21 O1 C24 C23B -12.6(5) . . . . ?
 C21 C22 C23 C24 -25.0(8) . . . . ?
 C21 C22 C23B C24 27.4(6) . . . . ?
 C22 C23 C24 O1 40.4(7) . . . . ?
 C22 C23 C24 C23B -75.8(8) . . . . ?
 C22 C23B C24 O1 -10.0(6) . . . . ?
 C22 C23B C24 C23 59.7(7) . . . . ?
 C23 C22 C23B C24 -83.6(7) . . . . ?
 C23B C22 C23 C24 54.9(6) . . . . ?
 C24 O1 C21 C22 29.7(3) . . . . ?
 Sc1A O1A C21A C22A 177.79(17) . . . . ?
 Sc1A O1A C24A C23A 156.85(17) . . . . ?
 Sc1A C1A C2A C3A 65.91(16) . . . . ?
 Sc1A C1A C2A C9A -120.2(2) . . . . ?
 Sc1A C1A C5A C4A -66.03(15) . . . . ?
 Sc1A C1A C5A C12A 118.3(2) . . . . ?
 Sc1A C2A C3A C4A 65.77(15) . . . . ?
 Sc1A C2A C3A C10A -119.1(2) . . . . ?
 Sc1A C3A C4A C5A 65.10(15) . . . . ?
 Sc1A C3A C4A C11A -119.8(2) . . . . ?
 Sc1A C4A C5A C1A 64.26(15) . . . . ?
 Sc1A C4A C5A C12A -120.1(2) . . . . ?
 Si1A C1A C2A Sc1A 123.47(17) . . . . ?
 Si1A C1A C2A C3A -170.62(16) . . . . ?
 Si1A C1A C2A C9A 3.3(3) . . . . ?
 Si1A C1A C5A Sc1A -123.38(17) . . . . ?
 Si1A C1A C5A C4A 170.59(16) . . . . ?
 Si1A C1A C5A C12A -5.0(3) . . . . ?
 O1A C21A C22A C23A 34.1(3) . . . . ?
 C1A Si1A C6A C6A 179.5(3) . . . 3_666 ?
 C1A C2A C3A Sc1A -64.12(15) . . . . ?
 C1A C2A C3A C4A 1.7(2) . . . . ?
 C1A C2A C3A C10A 176.8(2) . . . . ?
 C2A C1A C5A Sc1A 68.34(15) . . . . ?
 C2A C1A C5A C4A 2.3(2) . . . . ?
 C2A C1A C5A C12A -173.3(2) . . . . ?
 C2A C3A C4A Sc1A -65.30(15) . . . . ?
 C2A C3A C4A C5A -0.2(2) . . . . ?
 C2A C3A C4A C11A 174.9(2) . . . . ?
 C3A C4A C5A Sc1A -65.59(15) . . . . ?
 C3A C4A C5A C1A -1.3(2) . . . . ?
 C3A C4A C5A C12A 174.4(2) . . . . ?
 C5A C1A C2A Sc1A -68.34(15) . . . . ?
 C5A C1A C2A C3A -2.4(2) . . . . ?
 C5A C1A C2A C9A 171.5(2) . . . . ?
 C6A Si1A C1A Sc1A -177.77(14) . . . . ?
 C6A Si1A C1A C2A 85.0(2) . . . . ?
 C6A Si1A C1A C5A -81.0(2) . . . . ?
 C7A Si1A C1A Sc1A 63.1(2) . . . . ?
 C7A Si1A C1A C2A -34.2(3) . . . . ?
 C7A Si1A C1A C5A 159.8(2) . . . . ?
 C7A Si1A C6A C6A -58.5(3) . . . 3_666 ?
 C8A Si1A C1A Sc1A -58.16(19) . . . . ?
 C8A Si1A C1A C2A -155.4(2) . . . . ?
 C8A Si1A C1A C5A 38.6(2) . . . . ?
 C8A Si1A C6A C6A 56.2(3) . . . 3_666 ?
 C9A C2A C3A Sc1A 121.8(2) . . . . ?
 C9A C2A C3A C4A -172.5(2) . . . . ?
 C9A C2A C3A C10A 2.7(4) . . . . ?
 C10A C3A C4A Sc1A 119.4(2) . . . . ?
 C10A C3A C4A C5A -175.5(2) . . . . ?
 C10A C3A C4A C11A -0.4(3) . . . . ?
 C11A C4A C5A Sc1A 119.6(2) . . . . ?
 C11A C4A C5A C1A -176.2(2) . . . . ?
 C11A C4A C5A C12A -0.5(4) . . . . ?
 C14A Si2A C13A Sc1A -165.24(14) . . . . ?
 C15A Si2A C13A Sc1A 75.56(17) . . . . ?
 C16A Si2A C13A Sc1A -45.33(18) . . . . ?
 C18A Si3A C17A Sc1A 138.6(2) . . . . ?
 C19A Si3A C17A Sc1A -102.3(2) . . . . ?
 C20A Si3A C17A Sc1A 18.4(2) . . . . ?
 C21A O1A C24A C23A -10.0(3) . . . . ?
 C21A C22A C23A C24A -40.0(3) . . . . ?
 C22A C23A C24A O1A 30.9(3) . . . . ?
 C24A O1A C21A C22A -15.2(3) . . . . ?

_shelx_res_file
;
TITL cx0584a in P2(1)/c
CELL 0.71073 14.3075 24.9505 17.0373 90 98.0087 90
ZERR 4 0.0014 0.0024 0.0016 0 0.0057 0
LATT 1
SYMM -X,0.5+Y,0.5-Z
SFAC C H O Si Sc
UNIT 192 400 8 24 8

L.S. 10
PLAN  20
SIZE 0.1 0.165 0.445
TEMP -173.1
BOND $H
wpdb -2
MORE -1
CONF
fmap 2
acta
REM <olex2.extras>
REM <HklSrc "%.\\cx0584a.hkl">
REM </olex2.extras>

WGHT    0.059200    6.031700
FVAR       0.08572   0.34052
SC1   5    0.940649    0.616923    0.722783    11.00000    0.01817    0.01999 =
         0.01697    0.00093    0.00074   -0.00190
SI1   4    1.020564    0.578220    0.935272    11.00000    0.02880    0.02417 =
         0.01881    0.00300   -0.00569   -0.00562
SI2   4    1.142622    0.588157    0.601715    11.00000    0.02351    0.03463 =
         0.02654   -0.00446    0.00716   -0.00267
SI3   4    1.008015    0.755324    0.754071    11.00000    0.02788    0.02224 =
         0.02401    0.00165    0.00163   -0.00233
O1    3    0.852851    0.638901    0.613537    11.00000    0.02697    0.02726 =
         0.02038    0.00166   -0.00117    0.00124
C1    1    0.938436    0.563150    0.842633    11.00000    0.02072    0.02018 =
         0.01757    0.00261   -0.00084   -0.00169
C2    1    0.842493    0.580130    0.819366    11.00000    0.01952    0.02162 =
         0.02180    0.00432    0.00220   -0.00074
C3    1    0.807842    0.555439    0.746590    11.00000    0.02018    0.02338 =
         0.02128    0.00453    0.00012   -0.00465
C4    1    0.880068    0.522268    0.724126    11.00000    0.02540    0.02113 =
         0.01898    0.00210    0.00157   -0.00601
C5    1    0.959432    0.526092    0.783027    11.00000    0.01858    0.01930 =
         0.02294    0.00312    0.00153   -0.00012
C6    1    1.045323    0.514441    0.991870    11.00000    0.02294    0.02845 =
         0.02124    0.00456   -0.00527   -0.00278
AFIX  23
H6A   2    1.081794    0.490217    0.961522    11.00000   -1.20000
H6B   2    1.084730    0.522443    1.043013    11.00000   -1.20000
AFIX   0
C7    1    0.970373    0.626288    1.002385    11.00000    0.06567    0.03357 =
         0.02352   -0.00450   -0.00644    0.00360
AFIX 137
H7A   2    0.959830    0.661049    0.975846    11.00000   -1.50000
H7B   2    1.014684    0.630662    1.051271    11.00000   -1.50000
H7C   2    0.910277    0.612368    1.015243    11.00000   -1.50000
AFIX   0
C8    1    1.135586    0.607123    0.914807    11.00000    0.03801    0.04616 =
         0.03235    0.01433   -0.01225   -0.01976
AFIX 137
H8A   2    1.167110    0.581565    0.883560    11.00000   -1.50000
H8B   2    1.175938    0.614273    0.965059    11.00000   -1.50000
H8C   2    1.123878    0.640650    0.885098    11.00000   -1.50000
AFIX   0
C9    1    0.785137    0.614942    0.866403    11.00000    0.02744    0.03023 =
         0.03389    0.00026    0.01131    0.00093
AFIX 137
H9A   2    0.820823    0.647475    0.883155    11.00000   -1.50000
H9B   2    0.771260    0.595308    0.913243    11.00000   -1.50000
H9C   2    0.725882    0.624771    0.833521    11.00000   -1.50000
AFIX   0
C10   1    0.709365    0.560166    0.702596    11.00000    0.02265    0.03928 =
         0.03026    0.01102   -0.00543   -0.00674
AFIX 137
H10A  2    0.677363    0.590715    0.723325    11.00000   -1.50000
H10B  2    0.674198    0.527234    0.709777    11.00000   -1.50000
H10C  2    0.712432    0.565624    0.646050    11.00000   -1.50000
AFIX   0
C11   1    0.871246    0.485623    0.653342    11.00000    0.03785    0.02868 =
         0.02213   -0.00081    0.00203   -0.00791
AFIX 137
H11A  2    0.807149    0.487995    0.624501    11.00000   -1.50000
H11B  2    0.884060    0.448656    0.671096    11.00000   -1.50000
H11C  2    0.916784    0.496351    0.618324    11.00000   -1.50000
AFIX   0
C12   1    1.045965    0.492007    0.785130    11.00000    0.02733    0.02293 =
         0.03375    0.00077    0.00387    0.00362
AFIX 137
H12A  2    1.056996    0.484069    0.730838    11.00000   -1.50000
H12B  2    1.036999    0.458429    0.812977    11.00000   -1.50000
H12C  2    1.100499    0.511229    0.812950    11.00000   -1.50000
AFIX   0
C13   1    1.082890    0.610265    0.685271    11.00000    0.02539    0.02886 =
         0.02345   -0.00160    0.00373   -0.00411
AFIX  23
H13A  2    1.106603    0.647415    0.693310    11.00000   -1.20000
H13B  2    1.117624    0.589747    0.729824    11.00000   -1.20000
AFIX   0
C14   1    1.129833    0.514407    0.581363    11.00000    0.03287    0.04117 =
         0.03548   -0.01128    0.00891   -0.00154
AFIX 137
H14A  2    1.157325    0.494296    0.628381    11.00000   -1.50000
H14B  2    1.162723    0.505020    0.536512    11.00000   -1.50000
H14C  2    1.062772    0.505394    0.568569    11.00000   -1.50000
AFIX   0
C15   1    1.273282    0.602280    0.619639    11.00000    0.02850    0.05410 =
         0.05067   -0.00805    0.01301   -0.00700
AFIX 137
H15A  2    1.283645    0.640960    0.625913    11.00000   -1.50000
H15B  2    1.302486    0.589429    0.574428    11.00000   -1.50000
H15C  2    1.301645    0.583793    0.667894    11.00000   -1.50000
AFIX   0
C16   1    1.094883    0.623935    0.507281    11.00000    0.04369    0.05204 =
         0.03001    0.00321    0.01347   -0.00123
AFIX 137
H16A  2    1.035715    0.606994    0.483861    11.00000   -1.50000
H16B  2    1.140960    0.621830    0.469882    11.00000   -1.50000
H16C  2    1.083129    0.661603    0.518953    11.00000   -1.50000
AFIX   0
C17   1    0.936768    0.697959    0.779400    11.00000    0.02576    0.02407 =
         0.02152    0.00027    0.00231    0.00005
AFIX  23
H17A  2    0.870109    0.709827    0.770330    11.00000   -1.20000
H17B  2    0.952906    0.692322    0.837219    11.00000   -1.20000
AFIX   0
C18   1    1.133552    0.747447    0.802765    11.00000    0.03416    0.03201 =
         0.03186    0.00290   -0.00706   -0.00694
AFIX 137
H18A  2    1.135347    0.747114    0.860474    11.00000   -1.50000
H18B  2    1.171460    0.777443    0.787574    11.00000   -1.50000
H18C  2    1.159258    0.713679    0.785617    11.00000   -1.50000
AFIX   0
C19   1    1.011153    0.761858    0.644578    11.00000    0.03723    0.04161 =
         0.03019    0.01224    0.00192   -0.00344
AFIX 137
H19A  2    1.025564    0.726929    0.622842    11.00000   -1.50000
H19B  2    1.059934    0.787756    0.635300    11.00000   -1.50000
H19C  2    0.949595    0.774294    0.618495    11.00000   -1.50000
AFIX   0
C20   1    0.964524    0.821286    0.787127    11.00000    0.05442    0.02750 =
         0.06583   -0.00239    0.02027   -0.00192
AFIX 137
H20A  2    0.897713    0.825621    0.765835    11.00000   -1.50000
H20B  2    1.001175    0.850385    0.767673    11.00000   -1.50000
H20C  2    0.971936    0.822352    0.845163    11.00000   -1.50000
AFIX   0
C21   1    0.848690    0.607367    0.541325    11.00000    0.04910    0.03821 =
         0.02050   -0.00038   -0.00060    0.00860
AFIX  23
H21A  2    0.797077    0.580672    0.537733    11.00000   -1.20000
H21B  2    0.909107    0.588501    0.538965    11.00000   -1.20000
AFIX   0
C22   1    0.830052    0.648606    0.475859    11.00000    0.06821    0.07439 =
         0.03242    0.02189    0.01439    0.02449
PART 1
AFIX  23
H22A  2    0.881200    0.646986    0.442324    21.00000   -1.20000
H22B  2    0.769951    0.639903    0.442067    21.00000   -1.20000
AFIX  23
PART 0
PART 2
H22C  2    0.889408    0.665475    0.464638   -21.00000   -1.20000
H22D  2    0.797083    0.632484    0.426533   -21.00000   -1.20000
AFIX   0
PART 0
PART 1
C23   1    0.825170    0.697351    0.503883    21.00000    0.03119    0.03118 =
         0.02187    0.01045   -0.00743    0.00138
AFIX  23
H23A  2    0.777196    0.719074    0.470468    21.00000   -1.20000
H23B  2    0.886978    0.715765    0.508371    21.00000   -1.20000
AFIX   0
PART 0
PART 2
C23B  1    0.768073    0.688380    0.510470   -21.00000    0.04532    0.04879 =
         0.03352    0.00938   -0.00873    0.01406
AFIX  23
H23C  2    0.779662    0.725045    0.491813   -21.00000   -1.20000
H23D  2    0.700668    0.679477    0.494542   -21.00000   -1.20000
AFIX   0
PART 0
C24   1    0.792344    0.684939    0.595979    11.00000    0.03644    0.03889 =
         0.04443   -0.00261   -0.01355    0.01317
PART 1
AFIX  23
H24A  2    0.808649    0.714818    0.633636    21.00000   -1.20000
H24B  2    0.724567    0.675929    0.593113    21.00000   -1.20000
AFIX  23
PART 0
PART 2
H24C  2    0.825471    0.717930    0.616689   -21.00000   -1.20000
H24D  2    0.734451    0.680969    0.621221   -21.00000   -1.20000
AFIX   0

PART 0
SC1A  5    0.568183    0.355071    0.787792    11.00000    0.01677    0.01969 =
         0.01523    0.00112   -0.00001   -0.00094
SI1A  4    0.491575    0.434927    0.594902    11.00000    0.02261    0.02916 =
         0.02004    0.00608   -0.00659   -0.00503
SI2A  4    0.482275    0.225554    0.722651    11.00000    0.02708    0.02361 =
         0.02374   -0.00179    0.00014   -0.00393
SI3A  4    0.365703    0.383951    0.904853    11.00000    0.02314    0.02876 =
         0.02848    0.00131    0.00842    0.00346
O1A   3    0.646637    0.315886    0.890582    11.00000    0.02361    0.02668 =
         0.01996    0.00336    0.00073    0.00452
C1A   1    0.574457    0.426780    0.689203    11.00000    0.01860    0.02100 =
         0.01838    0.00367   -0.00153   -0.00317
C2A   1    0.569076    0.453910    0.763068    11.00000    0.01931    0.01809 =
         0.02216    0.00247    0.00098   -0.00135
C3A   1    0.652537    0.443252    0.815091    11.00000    0.02027    0.01903 =
         0.01875    0.00081   -0.00064   -0.00131
C4A   1    0.712041    0.410931    0.774348    11.00000    0.01595    0.02109 =
         0.01704    0.00274   -0.00020   -0.00219
C5A   1    0.665265    0.401380    0.697035    11.00000    0.01975    0.01895 =
         0.01925    0.00256    0.00199   -0.00258
C6A   1    0.530835    0.494051    0.540335    11.00000    0.03457    0.03219 =
         0.02164    0.00928   -0.01111   -0.01005
AFIX  23
H6AA  2    0.530709    0.526109    0.574562    11.00000   -1.20000
H6AB  2    0.596662    0.487935    0.530724    11.00000   -1.20000
AFIX   0
C7A   1    0.367781    0.447350    0.612553    11.00000    0.02106    0.11261 =
         0.03541    0.02493   -0.00772    0.00079
AFIX 137
H7AA  2    0.346594    0.417713    0.643458    11.00000   -1.50000
H7AB  2    0.326756    0.449914    0.561594    11.00000   -1.50000
H7AC  2    0.364885    0.480956    0.641892    11.00000   -1.50000
AFIX   0
C8A   1    0.487970    0.375572    0.527468    11.00000    0.07132    0.03465 =
         0.03298    0.00255   -0.02992   -0.00857
AFIX 137
H8AA  2    0.550357    0.370222    0.511193    11.00000   -1.50000
H8AB  2    0.441376    0.381804    0.480495    11.00000   -1.50000
H8AC  2    0.470289    0.343593    0.555388    11.00000   -1.50000
AFIX   0
C9A   1    0.492927    0.492307    0.780777    11.00000    0.02382    0.02494 =
         0.03385    0.00250    0.00342    0.00472
AFIX 137
H9AA  2    0.431815    0.473908    0.773592    11.00000   -1.50000
H9AB  2    0.490420    0.522972    0.744601    11.00000   -1.50000
H9AC  2    0.507203    0.504920    0.835612    11.00000   -1.50000
AFIX   0
C10A  1    0.680056    0.465366    0.897394    11.00000    0.02831    0.02973 =
         0.02122   -0.00453   -0.00102   -0.00254
AFIX 137
H10D  2    0.623026    0.473646    0.920929    11.00000   -1.50000
H10E  2    0.717290    0.498106    0.894605    11.00000   -1.50000
H10F  2    0.717745    0.438724    0.930160    11.00000   -1.50000
AFIX   0
C11A  1    0.810753    0.395047    0.808535    11.00000    0.01840    0.02952 =
         0.02406    0.00273   -0.00246    0.00036
AFIX 137
H11D  2    0.810725    0.381005    0.862251    11.00000   -1.50000
H11E  2    0.852180    0.426438    0.810464    11.00000   -1.50000
H11F  2    0.833679    0.367347    0.775167    11.00000   -1.50000
AFIX   0
C12A  1    0.707443    0.372927    0.632381    11.00000    0.02582    0.02824 =
         0.02184    0.00010    0.00445   -0.00394
AFIX 137
H12D  2    0.772913    0.363094    0.651755    11.00000   -1.50000
H12E  2    0.705996    0.396685    0.586423    11.00000   -1.50000
H12F  2    0.670874    0.340479    0.616880    11.00000   -1.50000
AFIX   0
C13A  1    0.564529    0.281137    0.712577    11.00000    0.02628    0.02501 =
         0.01894    0.00062    0.00182   -0.00117
AFIX  23
H13C  2    0.552590    0.293081    0.656664    11.00000   -1.20000
H13D  2    0.628953    0.265781    0.720899    11.00000   -1.20000
AFIX   0
C14A  1    0.514043    0.162194    0.672573    11.00000    0.04723    0.02801 =
         0.04396   -0.00712    0.00833   -0.00422
AFIX 137
H14D  2    0.513519    0.168954    0.615851    11.00000   -1.50000
H14E  2    0.467988    0.134178    0.679774    11.00000   -1.50000
H14F  2    0.577165    0.150456    0.696016    11.00000   -1.50000
AFIX   0
C15A  1    0.361005    0.245633    0.675478    11.00000    0.03096    0.03856 =
         0.04741   -0.00865   -0.01029   -0.00273
AFIX 137
H15D  2    0.344706    0.280454    0.696471    11.00000   -1.50000
H15E  2    0.315199    0.218662    0.687368    11.00000   -1.50000
H15F  2    0.359757    0.248272    0.617951    11.00000   -1.50000
AFIX   0
C16A  1    0.476540    0.206277    0.828684    11.00000    0.03788    0.03515 =
         0.03342    0.00523    0.00661   -0.00612
AFIX 137
H16D  2    0.537798    0.191978    0.852440    11.00000   -1.50000
H16E  2    0.427770    0.178890    0.830406    11.00000   -1.50000
H16F  2    0.461067    0.237927    0.858414    11.00000   -1.50000
AFIX   0
C17A  1    0.424504    0.362368    0.820407    11.00000    0.02108    0.02773 =
         0.02476    0.00133    0.00219    0.00013
AFIX  23
H17C  2    0.391997    0.384334    0.776466    11.00000   -1.20000
H17D  2    0.399118    0.325736    0.810169    11.00000   -1.20000
AFIX   0
C18A  1    0.256094    0.423882    0.872709    11.00000    0.03717    0.06153 =
         0.05804    0.00279    0.01116    0.02166
AFIX 137
H18D  2    0.229626    0.436344    0.919523    11.00000   -1.50000
H18E  2    0.209702    0.401349    0.840237    11.00000   -1.50000
H18F  2    0.271641    0.454833    0.841558    11.00000   -1.50000
AFIX   0
C19A  1    0.330697    0.322981    0.957866    11.00000    0.05118    0.03929 =
         0.03829   -0.00028    0.02271   -0.00690
AFIX 137
H19D  2    0.386383    0.300524    0.973468    11.00000   -1.50000
H19E  2    0.283586    0.302605    0.922632    11.00000   -1.50000
H19F  2    0.303803    0.333908    1.005240    11.00000   -1.50000
AFIX   0
C20A  1    0.440014    0.427221    0.979195    11.00000    0.04586    0.03446 =
         0.03284   -0.00652    0.00957    0.00529
AFIX 137
H20D  2    0.500678    0.409547    0.995976    11.00000   -1.50000
H20E  2    0.407219    0.432792    1.025341    11.00000   -1.50000
H20F  2    0.450934    0.461912    0.955071    11.00000   -1.50000
AFIX   0
C21A  1    0.715722    0.272935    0.886013    11.00000    0.02495    0.02898 =
         0.03024    0.00077   -0.00133    0.00837
AFIX  23
H21C  2    0.767024    0.285051    0.856777    11.00000   -1.20000
H21D  2    0.685204    0.240972    0.859174    11.00000   -1.20000
AFIX   0
C22A  1    0.753309    0.260641    0.970984    11.00000    0.04425    0.04181 =
         0.03197   -0.00205   -0.01175    0.01749
AFIX  23
H22E  2    0.805552    0.285131    0.991338    11.00000   -1.20000
H22F  2    0.775740    0.223142    0.977182    11.00000   -1.20000
AFIX   0
C23A  1    0.667700    0.269758    1.012784    11.00000    0.04819    0.04880 =
         0.02526    0.01351   -0.00162    0.00526
AFIX  23
H23E  2    0.624059    0.238800    1.005662    11.00000   -1.20000
H23F  2    0.686469    0.276231    1.070144    11.00000   -1.20000
AFIX   0
C24A  1    0.623394    0.319061    0.971824    11.00000    0.02981    0.04065 =
         0.01836    0.00421    0.00331    0.00520
AFIX  23
H24E  2    0.554175    0.318970    0.971670    11.00000   -1.20000
H24F  2    0.649974    0.352028    0.998538    11.00000   -1.20000
AFIX   0
HKLF 4

REM  cx0584a in P2(1)/c
REM R1 =  0.0586 for   12099 Fo > 4sig(Fo)  and  0.0988 for all   17663 data
REM    557 parameters refined using      0 restraints

END

WGHT      0.0592      6.0463

REM Highest difference peak  0.850,  deepest hole -0.324,  1-sigma level  0.091
Q1    1   0.5620  0.3875  0.7868  11.00000  0.05    0.85
Q2    1   0.9367  0.6486  0.7233  11.00000  0.05    0.81
Q3    1   0.5640  0.3220  0.7834  11.00000  0.05    0.74
Q4    1   0.9508  0.5891  0.7226  11.00000  0.05    0.70
Q5    1   0.4858  0.3991  0.5782  11.00000  0.05    0.66
Q6    1   1.1313  0.5506  0.5908  11.00000  0.05    0.65
Q7    1   1.0203  0.5446  0.9336  11.00000  0.05    0.64
Q8    1   0.4183  0.2380  0.6985  11.00000  0.05    0.60
Q9    1   0.6176  0.4509  0.7843  11.00000  0.05    0.57
Q10   1   0.9222  0.6196  0.6932  11.00000  0.05    0.56
Q11   1   0.5562  0.3561  0.7594  11.00000  0.05    0.55
Q12   1   0.5070  0.4672  0.5838  11.00000  0.05    0.54
Q13   1   0.8282  0.5774  0.7703  11.00000  0.05    0.53
Q14   1   1.0078  0.7905  0.7677  11.00000  0.05    0.53
Q15   1   0.5446  0.4251  0.6421  11.00000  0.05    0.51
Q16   1   0.5622  0.4190  0.7729  11.00000  0.05    0.51
Q17   1   0.9694  0.7300  0.7575  11.00000  0.05    0.50
Q18   1   0.6243  0.4188  0.6900  11.00000  0.05    0.50
Q19   1   0.9891  0.5772  0.8871  11.00000  0.05    0.48
Q20   1   0.3648  0.4194  0.8977  11.00000  0.05    0.48
;
_shelx_res_checksum               82935
_shelx_hkl_file
;
   2   0   0  718.54   34.04
   2   0   0  711.84   34.02
   2   0   0  761.36   34.04
  -2   0   0  738.10   34.04
   3   0   0    1.47    0.23
   3   0   0    2.17    0.26
  -3   0   0    2.10    0.30
   3   0   0    2.22    0.23
   3   0   0    1.51    0.25
   4   0   0    9.09    0.56
  -4   0   0    7.33    0.57
   4   0   0    8.35    0.55
   4   0   0    7.80    0.51
   5   0   0   32.27    1.68
   5   0   0   33.04    1.68
  -5   0   0   33.11    1.71
   5   0   0   34.18    1.65
  -5   0   0   33.47    1.83
   5   0   0   30.88    1.64
  -5   0   0   32.40    1.64
   6   0   0  222.23   10.27
   6   0   0  215.09   10.31
   6   0   0  218.67   10.31
  -6   0   0  221.82   10.47
  -6   0   0  224.13   10.25
  -6   0   0  220.61   10.34
   6   0   0  206.86   10.26
   7   0   0    3.62    0.48
  -7   0   0    3.78    0.53
   7   0   0    3.31    0.42
  -7   0   0    3.58    0.62
   7   0   0    3.89    0.50
  -7   0   0    3.16    0.38
  -8   0   0    1.13    0.30
  -8   0   0    1.43    0.44
   8   0   0    2.15    0.45
  -8   0   0    1.35    0.55
   8   0   0    1.67    0.39
   8   0   0    1.56    0.39
   9   0   0   15.18    1.08
  -9   0   0   14.72    1.11
   9   0   0   15.27    1.09
   9   0   0   15.03    1.00
  -9   0   0   15.02    0.93
  -9   0   0   14.58    1.30
  -9   0   0   15.33    1.15
  10   0   0   44.06    2.41
  10   0   0   45.25    2.43
 -10   0   0   44.90    2.45
 -10   0   0   43.12    2.24
 -10   0   0   46.82    2.48
  10   0   0   41.94    2.34
 -10   0   0   43.23    2.68
 -11   0   0   11.20    1.29
 -11   0   0   12.34    1.17
  11   0   0   12.52    1.04
 -11   0   0   14.03    1.22
  11   0   0   12.21    1.09
  12   0   0    2.77    0.66
  12   0   0    2.86    0.64
 -12   0   0    1.06    0.85
 -12   0   0    1.04    0.76
 -12   0   0    1.81    0.76
 -13   0   0   18.84    1.70
  13   0   0   19.31    1.50
 -13   0   0   22.94    1.62
  13   0   0   17.91    1.54
 -13   0   0   20.70    1.86
  14   0   0  140.17    6.76
 -14   0   0  138.68    6.81
  14   0   0  130.78    6.79
 -14   0   0  137.45    6.93
 -14   0   0  128.55    7.07
 -15   0   0    5.31    1.25
  15   0   0    5.46    1.03
  15   0   0    5.90    0.97
 -15   0   0    3.85    1.07
  16   0   0   23.46    1.92
 -16   0   0   21.67    1.85
  16   0   0   24.51    1.83
 -16   0   0   18.58    2.11
 -17   0   0   -0.82    0.96
  17   0   0    0.46    1.07
  17   0   0    1.80    1.02
  18   0   0    0.76    1.03
  18   0   0   -0.02    1.18
 -18   0   0   -0.63    0.99
  19   0   0    2.84    1.22
 -19   0   0    0.90    1.18
  20   0   0    1.40    1.26
   0  -1   0   -0.01    0.02
   0   1   0   -0.02    0.01
   1   1   0    2.99    0.17
   1   1   0    2.48    0.17
   2  -1   0   78.30    3.75
  -2  -1   0   77.58    3.75
  -2  -1   0   79.64    3.74
   2  -1   0   80.51    3.73
   2   1   0   78.39    3.74
   2   1   0   82.71    3.75
  -2   1   0   78.67    3.75
   2   1   0   79.99    3.74
  -3  -1   0    0.80    0.19
   3  -1   0    0.67    0.17
  -3  -1   0    0.70    0.25
  -3  -1   0    0.88    0.21
   3  -1   0    0.14    0.18
   3   1   0    0.94    0.19
  -3   1   0    0.52    0.23
   3   1   0    0.40    0.18
   3   1   0    0.74    0.19
   3   1   0    0.89    0.18
   3   1   0    0.43    0.17
  -4  -1   0    0.10    0.23
   4  -1   0    0.16    0.19
  -4  -1   0    0.23    0.23
   4  -1   0   -0.06    0.19
   4  -1   0    0.04    0.20
   4  -1   0    0.26    0.18
   4   1   0    0.03    0.30
   4   1   0    0.25    0.21
  -4   1   0    0.02    0.22
   4   1   0    0.23    0.21
   4   1   0    0.09    0.19
  -5  -1   0    9.03    0.68
   5  -1   0    9.09    0.65
   5  -1   0   10.47    0.66
   5  -1   0    9.48    0.61
   5  -1   0    9.51    0.61
  -5  -1   0    9.67    0.59
  -5  -1   0    9.88    0.81
  -5  -1   0    9.59    0.69
   5   1   0    9.10    0.65
   5   1   0    9.16    0.62
  -5   1   0    9.59    0.61
   5   1   0    8.94    0.61
  -5   1   0   10.76    0.81
   5   1   0    9.65    0.67
  -5   1   0    9.37    0.68
   6  -1   0  106.69    5.34
  -6  -1   0  111.46    5.57
   6  -1   0  112.31    5.40
  -6  -1   0  112.44    5.43
  -6  -1   0  112.80    5.41
  -6  -1   0  114.57    5.33
   6  -1   0  110.00    5.35
   6  -1   0  108.19    5.39
  -6   1   0  116.78    5.42
   6   1   0  112.79    5.39
   6   1   0  113.63    5.36
  -6   1   0  120.19    5.57
   6   1   0  112.43    5.40
   6   1   0  108.01    5.35
  -6   1   0  115.40    5.35
   7  -1   0   19.07    1.14
  -7  -1   0   19.27    1.18
   7  -1   0   18.74    1.14
  -7  -1   0   18.22    1.16
  -7  -1   0   18.49    1.03
   7  -1   0   20.09    1.09
  -7  -1   0   17.42    1.32
  -7   1   0   18.13    1.16
  -7   1   0   18.90    1.31
  -7   1   0   19.70    1.06
   7   1   0   18.45    1.15
   7   1   0   19.61    1.14
   7   1   0   17.89    1.08
  -8  -1   0   25.20    1.53
  -8  -1   0   25.10    1.71
  -8  -1   0   27.30    1.56
  -8  -1   0   26.73    1.39
   8  -1   0   27.32    1.46
   8  -1   0   26.23    1.52
   8  -1   0   25.77    1.49
  -8   1   0   26.17    1.69
   8   1   0   25.58    1.50
   8   1   0   25.80    1.52
  -8   1   0   26.92    1.54
   8   1   0   26.43    1.46
  -8   1   0   26.02    1.41
  -9  -1   0    6.47    0.57
   9  -1   0    9.06    0.80
   9  -1   0    7.18    0.69
  -9  -1   0    7.12    0.82
  -9  -1   0    7.22    0.80
   9  -1   0    7.95    0.73
  -9  -1   0    7.20    0.94
  -9   1   0    8.38    0.82
  -9   1   0    6.64    0.90
   9   1   0    7.71    0.69
  -9   1   0    6.55    0.59
   9   1   0    6.96    0.73
   9   1   0    7.56    0.76
  10  -1   0   93.57    4.73
  10  -1   0   93.43    4.68
  10  -1   0   98.50    4.77
 -10  -1   0   95.26    4.78
 -10  -1   0   90.32    5.00
 -10  -1   0   96.99    4.79
  10   1   0   93.30    4.69
 -10   1   0   96.54    4.99
  10   1   0   97.24    4.74
 -10   1   0   98.60    4.78
  10   1   0   91.34    4.77
 -10   1   0   95.58    4.60
 -11  -1   0    1.60    0.68
  11  -1   0    2.10    0.57
 -11  -1   0    0.95    0.78
  11  -1   0    1.47    0.54
 -11  -1   0    1.53    0.68
 -11   1   0    1.93    0.69
  11   1   0    1.78    0.59
 -11   1   0    1.45    0.76
 -11   1   0    2.59    0.72
  11   1   0    2.39    0.57
  12  -1   0   68.87    3.68
 -12  -1   0   69.14    3.75
 -12  -1   0   71.75    4.02
  12  -1   0   67.00    3.63
 -12  -1   0   72.21    3.75
 -12   1   0   75.15    3.78
 -12   1   0   73.63    3.74
  12   1   0   66.04    3.62
  12   1   0   64.70    3.67
 -12   1   0   71.12    3.97
 -13  -1   0    1.70    0.83
  13  -1   0    0.46    0.69
 -13  -1   0   -0.17    0.86
  13  -1   0    0.06    0.61
 -13  -1   0    0.59    0.81
 -13   1   0    0.85    0.88
 -13   1   0   -0.35    0.81
 -13   1   0    1.20    0.80
  13   1   0    0.67    0.69
  13   1   0    0.76    0.64
 -14  -1   0   15.74    1.86
  14  -1   0   24.58    1.69
 -14  -1   0   21.80    1.78
 -14  -1   0   23.16    1.91
  14   1   0   21.58    1.63
 -14   1   0   23.83    1.95
 -14   1   0   24.19    2.00
  14   1   0   23.93    1.76
  15  -1   0    3.03    0.86
 -15  -1   0    1.96    1.08
 -15  -1   0    0.60    0.95
  15  -1   0    2.22    0.92
 -15   1   0    3.25    0.97
 -15   1   0    1.45    1.09
  15   1   0    3.53    1.02
  15   1   0    4.64    0.89
 -15   1   0    3.89    1.22
  16  -1   0   11.56    1.40
  16  -1   0   10.96    1.31
 -16  -1   0   12.08    1.76
 -16  -1   0   10.91    1.39
 -16   1   0   12.30    1.42
  16   1   0   12.76    1.47
  16   1   0   14.67    1.41
 -16   1   0   13.71    2.12
  17  -1   0    0.07    0.96
 -17  -1   0    0.45    1.02
  17  -1   0    1.81    1.06
 -17   1   0    0.15    0.95
  17   1   0    0.36    0.96
  17   1   0   -0.86    0.92
  18  -1   0    0.98    1.03
  18  -1   0    3.04    1.23
 -18  -1   0    1.27    1.12
  18   1   0    2.44    1.14
 -18   1   0    1.73    1.11
  18   1   0    1.02    1.19
  19  -1   0    0.99    1.13
 -19  -1   0   -1.09    1.08
 -19   1   0    0.40    1.16
  19   1   0    2.24    1.18
  20  -1   0    5.52    1.42
   1  -2   0   50.29    2.33
   1  -2   0   49.84    2.34
  -1  -2   0   48.20    2.34
   1  -2   0   49.27    2.34
  -1  -2   0   50.80    2.34
  -1  -2   0   48.35    2.33
   1   2   0   50.70    2.34
  -1   2   0   51.08    2.33
   1   2   0   48.75    2.33
   1   2   0   48.04    2.34
  -1   2   0   49.27    2.34
   1   2   0   48.49    2.32
   2  -2   0    1.71    0.17
  -2  -2   0    1.53    0.21
   2  -2   0    1.25    0.18
  -2  -2   0    1.09    0.18
  -2  -2   0    1.68    0.17
   2   2   0    1.70    0.18
  -2   2   0    1.59    0.16
   2   2   0    1.33    0.17
  -2   2   0    1.18    0.18
   2   2   0    1.05    0.16
   2   2   0    1.20    0.17
   2   2   0    1.45    0.15
  -3  -2   0   52.38    2.62
   3  -2   0   52.95    2.60
   3  -2   0   52.88    2.57
  -3  -2   0   52.94    2.61
  -3  -2   0   56.20    2.59
  -3   2   0   54.46    2.61
  -3   2   0   54.69    2.56
   3   2   0   54.27    2.61
   3   2   0   52.67    2.59
   3   2   0   54.39    2.59
   3   2   0   53.10    2.58
   3   2   0   56.25    2.60
   4  -2   0   36.88    1.86
  -4  -2   0   38.11    1.93
   4  -2   0   37.35    1.90
  -4  -2   0   38.53    1.91
   4  -2   0   39.93    1.87
   4  -2   0   37.29    1.90
  -4  -2   0   39.76    1.89
  -4  -2   0   36.90    2.16
  -4   2   0   39.14    1.91
  -4   2   0   35.45    1.87
   4   2   0   36.91    1.87
   4   2   0   38.69    1.89
   4   2   0   38.17    1.91
   4   2   0   39.04    1.91
   5  -2   0   66.63    3.32
   5  -2   0   65.55    3.28
  -5  -2   0   71.55    3.49
  -5  -2   0   66.97    3.34
   5  -2   0   66.71    3.32
  -5  -2   0   70.14    3.27
  -5  -2   0   70.43    3.30
  -5  -2   0   67.42    3.36
   5  -2   0   68.81    3.29
   5   2   0   67.96    3.32
  -5   2   0   75.42    3.47
   5   2   0   69.13    3.34
  -5   2   0   67.36    3.29
   5   2   0   68.02    3.34
   5   2   0   68.51    3.30
  -5   2   0   68.17    3.34
   5   2   0   65.18    3.29
   6  -2   0    3.95    0.46
   6  -2   0    5.09    0.44
  -6  -2   0    3.80    0.38
   6  -2   0    3.91    0.40
  -6  -2   0    3.31    0.49
   6  -2   0    3.20    0.44
  -6  -2   0    3.03    0.60
  -6  -2   0    5.05    0.56
  -6   2   0    3.17    0.57
   6   2   0    4.44    0.47
   6   2   0    3.76    0.45
  -6   2   0    4.95    0.51
   6   2   0    3.16    0.44
   6   2   0    3.79    0.42
   6   2   0    3.42    0.47
  -6   2   0    3.37    0.39
  -7  -2   0    0.28    0.35
   7  -2   0   -0.44    0.28
   7  -2   0   -0.13    0.25
  -7  -2   0   -0.19    0.23
  -7  -2   0   -0.28    0.40
  -7  -2   0   -0.28    0.34
   7  -2   0   -0.24    0.30
  -7   2   0   -0.20    0.34
  -7   2   0    0.00    0.40
   7   2   0   -0.06    0.32
   7   2   0    0.08    0.33
   7   2   0   -0.16    0.26
  -7   2   0    0.21    0.28
   8  -2   0    6.45    0.66
   8  -2   0    7.23    0.66
   8  -2   0    6.79    0.62
  -8  -2   0    5.43    0.81
  -8  -2   0    6.85    0.74
  -8  -2   0    6.62    0.70
  -8  -2   0    6.26    0.54
   8   2   0    6.48    0.61
  -8   2   0    7.48    0.84
  -8   2   0    7.17    0.73
  -8   2   0    7.90    0.61
   8   2   0    6.65    0.68
   8   2   0    5.77    0.63
  -9  -2   0   27.13    1.67
  -9  -2   0   28.70    1.67
  -9  -2   0   27.68    1.87
   9  -2   0   27.69    1.61
   9  -2   0   27.34    1.55
   9  -2   0   29.12    1.64
  -9  -2   0   25.92    1.45
  -9   2   0   27.85    1.50
   9   2   0   25.96    1.55
  -9   2   0   27.25    1.64
   9   2   0   27.98    1.64
   9   2   0   26.93    1.61
  -9   2   0   30.31    1.86
  10  -2   0    5.36    0.69
 -10  -2   0    3.73    0.72
 -10  -2   0    2.23    0.83
 -10  -2   0    4.07    0.74
  10  -2   0    3.87    0.64
  10  -2   0    4.85    0.60
  10   2   0    3.97    0.65
  10   2   0    3.41    0.65
 -10   2   0    3.89    0.85
 -10   2   0    5.83    0.76
  10   2   0    4.53    0.61
 -10   2   0    4.42    0.50
  11  -2   0   23.48    1.47
 -11  -2   0   19.69    1.75
 -11  -2   0   22.26    1.59
  11  -2   0   22.37    1.53
 -11  -2   0   23.36    1.60
 -11   2   0   22.43    1.74
  11   2   0   24.28    1.49
  11   2   0   22.33    1.53
 -11   2   0   24.57    1.60
 -12  -2   0    7.72    1.24
 -12  -2   0    9.90    1.12
  12  -2   0   11.47    1.00
  12  -2   0    9.69    1.02
 -12  -2   0    9.97    1.17
  12   2   0    9.21    1.02
 -12   2   0    9.09    1.20
  12   2   0    8.32    0.92
 -12   2   0   10.51    1.12
 -13  -2   0    7.99    1.37
 -13  -2   0   10.54    1.22
 -13  -2   0   12.37    1.33
  13  -2   0    9.66    1.10
  13  -2   0    9.64    1.04
 -13   2   0    9.43    1.24
  13   2   0    9.36    1.11
 -13   2   0   11.97    1.27
 -13   2   0    9.64    1.29
  13   2   0    9.94    1.03
 -14  -2   0    0.28    0.93
 -14  -2   0   -0.49    1.02
  14  -2   0    0.88    0.72
  14  -2   0    1.27    0.77
 -14  -2   0    1.88    0.92
 -14   2   0    1.35    0.84
 -14   2   0    0.68    0.91
  14   2   0    1.28    0.81
  14   2   0    1.29    0.73
 -14   2   0    0.10    0.86
 -15  -2   0    3.38    1.14
  15  -2   0    1.94    0.87
 -15  -2   0    2.03    1.01
  15  -2   0    2.30    0.84
 -15   2   0    1.33    1.00
  15   2   0    2.04    0.81
  15   2   0    1.87    0.93
 -15   2   0    2.40    0.93
 -15   2   0    0.67    1.06
 -16  -2   0    0.08    0.95
  16  -2   0    1.43    0.93
 -16  -2   0   -1.54    1.09
  16  -2   0    0.31    0.86
  16   2   0    1.13    0.99
 -16   2   0    0.87    0.94
  16   2   0    0.99    0.86
  17  -2   0    2.67    1.10
 -17  -2   0    1.47    1.01
  17  -2   0    2.38    1.01
  17   2   0    1.13    0.99
  17   2   0    2.62    1.13
 -17   2   0    3.33    1.07
  18  -2   0    0.52    1.03
  18  -2   0   -0.37    1.06
 -18  -2   0   -1.69    0.96
  18   2   0   -0.89    1.02
 -18   2   0    0.45    0.98
  18   2   0    0.19    1.03
  19  -2   0    0.63    1.11
 -19  -2   0    0.78    1.16
 -19   2   0    0.23    1.08
  19   2   0    0.12    1.10
   0  -3   0   -0.49    0.08
   0  -3   0   -0.46    0.08
   0  -3   0   -0.51    0.09
   0   3   0   -0.50    0.08
   0   3   0   -0.47    0.07
   0   3   0   -0.68    0.07
   0   3   0   -0.53    0.08
   1  -3   0   17.08    0.87
  -1  -3   0   17.52    0.88
  -1  -3   0   18.25    0.88
   1  -3   0   17.89    0.87
   1  -3   0   17.19    0.87
  -1   3   0   17.04    0.86
   1   3   0   17.58    0.87
  -1   3   0   17.94    0.86
   1   3   0   19.05    0.90
   1   3   0   16.97    0.85
  -1   3   0   16.48    0.87
   1   3   0   18.34    0.89
  -1   3   0   17.67    0.87
   1   3   0   17.59    0.87
   2  -3   0    1.46    0.22
  -2  -3   0    2.01    0.21
   2  -3   0    1.99    0.20
   2  -3   0    1.23    0.20
  -2  -3   0    1.12    0.19
  -2   3   0    1.80    0.18
   2   3   0    1.58    0.18
   2   3   0    1.78    0.21
   2   3   0    1.09    0.19
  -2   3   0    1.71    0.23
   2   3   0    1.63    0.17
   2   3   0    1.32    0.19
   3  -3   0    0.42    0.19
  -3  -3   0    0.67    0.24
  -3  -3   0    0.36    0.19
  -3  -3   0    0.97    0.25
  -3  -3   0    0.70    0.18
   3  -3   0    0.86    0.21
   3   3   0    0.57    0.19
   3   3   0    0.47    0.18
   3   3   0    0.37    0.20
   3   3   0    0.43    0.18
  -3   3   0    0.87    0.22
  -3   3   0    0.52    0.17
   3   3   0    0.95    0.18
  -4  -3   0    5.88    0.50
  -4  -3   0    5.82    0.51
   4  -3   0    5.31    0.42
  -4  -3   0    4.91    0.58
  -4  -3   0    5.15    0.44
   4  -3   0    4.91    0.41
  -4  -3   0    5.99    0.51
   4  -3   0    5.77    0.47
   4   3   0    5.14    0.45
   4   3   0    5.12    0.44
  -4   3   0    6.39    0.47
   4   3   0    4.98    0.45
   4   3   0    4.94    0.44
   4   3   0    5.12    0.43
  -4   3   0    6.38    0.38
  -4   3   0    4.92    0.43
  -5  -3   0   12.85    0.87
   5  -3   0   14.12    0.80
  -5  -3   0   14.55    0.76
   5  -3   0   14.67    0.80
  -5  -3   0   13.91    0.82
   5  -3   0   13.52    0.84
  -5  -3   0   15.16    1.03
   5  -3   0   14.54    0.85
  -5  -3   0   12.82    0.86
  -5   3   0   15.31    0.97
   5   3   0   14.06    0.86
   5   3   0   13.15    0.81
   5   3   0   14.22    0.84
  -5   3   0   13.06    0.80
   5   3   0   13.48    0.81
   5   3   0   13.72    0.84
  -5   3   0   12.87    0.84
   6  -3   0  120.42    5.76
  -6  -3   0  122.47    5.68
  -6  -3   0  118.79    5.77
   6  -3   0  113.01    5.71
  -6  -3   0  117.80    5.79
  -6  -3   0  123.56    5.96
  -6  -3   0  119.17    5.72
   6  -3   0  120.19    5.76
   6  -3   0  119.98    5.71
   6   3   0  119.17    5.75
   6   3   0  119.90    5.77
  -6   3   0  119.35    5.72
   6   3   0  121.10    5.77
   6   3   0  117.36    5.73
  -6   3   0  119.72    5.76
  -6   3   0  133.25    5.93
   7  -3   0    0.10    0.31
   7  -3   0    0.37    0.28
  -7  -3   0    0.21    0.45
  -7  -3   0    0.74    0.39
  -7  -3   0   -0.09    0.36
  -7  -3   0    0.78    0.25
   7  -3   0    0.16    0.33
   7   3   0    0.22    0.33
   7   3   0    0.41    0.35
  -7   3   0    0.44    0.42
   7   3   0    0.30    0.29
  -7   3   0    0.03    0.34
   7   3   0    0.33    0.31
  -7   3   0   -0.08    0.27
  -8  -3   0    0.31    0.43
   8  -3   0   -0.02    0.28
  -8  -3   0    0.39    0.25
  -8  -3   0   -0.20    0.39
  -8  -3   0    0.39    0.49
   8  -3   0    0.27    0.36
   8  -3   0    0.40    0.36
   8   3   0    0.23    0.37
  -8   3   0   -0.42    0.60
  -8   3   0   -0.15    0.44
   8   3   0    0.65    0.38
  -8   3   0   -0.40    0.38
  -8   3   0   -0.17    0.29
   8   3   0    0.02    0.30
   9  -3   0    2.48    0.47
  -9  -3   0    3.40    0.64
   9  -3   0    3.37    0.53
   9  -3   0    3.28    0.55
  -9  -3   0    3.10    0.71
  -9  -3   0    2.99    0.62
   9   3   0    3.24    0.55
   9   3   0    3.38    0.49
  -9   3   0    3.00    0.58
  -9   3   0    2.84    0.63
   9   3   0    2.44    0.51
  -9   3   0    2.64    0.43
  10  -3   0   20.70    1.38
 -10  -3   0   19.66    1.42
  10  -3   0   20.14    1.35
  10  -3   0   20.09    1.29
 -10  -3   0   19.65    1.64
 -10  -3   0   20.59    1.41
 -10   3   0   20.64    1.38
 -10   3   0   20.29    1.22
  10   3   0   19.82    1.39
 -10   3   0   19.27    1.56
  10   3   0   20.12    1.29
  10   3   0   20.18    1.36
 -11  -3   0    1.49    0.71
  11  -3   0    3.63    0.63
 -11  -3   0    2.44    0.82
 -11  -3   0    2.38    0.75
  11  -3   0    2.17    0.64
 -11   3   0    3.02    0.48
  11   3   0    2.16    0.55
 -11   3   0    2.78    0.78
  11   3   0    2.78    0.64
 -11   3   0    2.94    0.74
  12  -3   0    2.26    0.68
  12  -3   0    3.31    0.67
 -12  -3   0    1.72    0.83
 -12  -3   0    3.85    0.85
 -12  -3   0    2.17    0.95
  12   3   0    3.26    0.66
  12   3   0    3.29    0.77
 -12   3   0    2.43    0.50
 -12   3   0    2.79    0.85
 -12   3   0    2.49    0.80
 -13  -3   0    6.30    1.24
  13  -3   0    6.93    0.94
 -13  -3   0    8.39    1.17
  13  -3   0    8.37    1.03
 -13  -3   0    8.87    1.18
 -13   3   0    7.98    1.10
  13   3   0    8.05    0.97
  13   3   0    8.88    1.05
 -13   3   0    8.47    1.23
  14  -3   0    1.13    0.72
  14  -3   0    0.85    0.81
 -14  -3   0   -2.39    0.93
 -14  -3   0    1.79    0.92
 -14   3   0    0.14    0.88
  14   3   0    1.42    0.84
  14   3   0    0.29    0.69
 -14   3   0    0.55    0.94
 -14   3   0   -0.01    0.80
  15  -3   0   10.73    1.22
 -15  -3   0    6.74    1.25
 -15  -3   0   10.80    1.52
  15  -3   0    8.76    1.17
  15   3   0   10.77    1.20
 -15   3   0    9.14    1.41
  15   3   0    9.52    1.25
 -15   3   0    8.34    1.21
 -15   3   0    9.64    1.44
 -16  -3   0    0.32    1.15
 -16  -3   0    1.91    1.04
  16  -3   0    2.57    0.95
  16  -3   0    3.31    1.02
 -16   3   0    2.26    1.01
  16   3   0    4.04    1.00
  16   3   0    1.88    1.02
  17  -3   0    0.66    0.98
 -17  -3   0   -0.42    0.95
  17  -3   0    0.38    0.96
  17   3   0    1.60    1.07
  17   3   0   -1.65    0.86
 -17   3   0    0.92    0.96
  18  -3   0    0.46    1.01
 -18  -3   0    0.85    1.11
  18  -3   0   -0.47    1.07
 -18   3   0   -0.33    0.96
  18   3   0    0.13    1.20
  18   3   0   -0.56    1.00
  19  -3   0    0.96    1.16
 -19  -3   0   -1.46    1.09
 -19   3   0   -0.40    1.07
  19   3   0    1.36    1.18
   0  -4   0  192.18    9.01
   0  -4   0  196.72    9.00
   0  -4   0  197.06    9.00
   0   4   0  194.91    9.01
   0   4   0  189.18    9.00
   0   4   0  190.46    8.99
   0   4   0  187.70    9.00
   1  -4   0    2.56    0.22
  -1  -4   0    2.36    0.23
   1  -4   0    2.30    0.23
   1  -4   0    2.77    0.23
  -1  -4   0    2.36    0.24
   1   4   0    2.26    0.22
  -1   4   0    2.35    0.20
  -1   4   0    2.38    0.22
   1   4   0    1.75    0.21
   1   4   0    2.41    0.20
  -1   4   0    2.50    0.21
   1   4   0    2.04    0.20
  -1   4   0    2.32    0.21
   1   4   0    1.73    0.20
  -2  -4   0   62.43    3.05
   2  -4   0   64.94    3.04
   2  -4   0   63.03    3.05
   2  -4   0   65.23    3.05
  -2   4   0   61.26    3.05
   2   4   0   67.94    3.05
   2   4   0   66.55    3.06
   2   4   0   63.30    3.02
   2   4   0   61.76    3.05
  -2   4   0   66.41    3.03
   2   4   0   61.57    3.05
  -3  -4   0   25.08    1.28
   3  -4   0   25.35    1.27
   3  -4   0   24.39    1.25
   3  -4   0   26.18    1.29
  -3  -4   0   23.90    1.31
   3  -4   0   24.33    1.29
  -3  -4   0   27.08    1.27
   3   4   0   24.69    1.29
   3   4   0   25.08    1.28
   3   4   0   24.40    1.28
  -3   4   0   26.87    1.25
  -3   4   0   23.48    1.28
   3   4   0   25.09    1.27
  -3   4   0   25.08    1.27
   3   4   0   25.66    1.25
   3   4   0   26.21    1.29
  -4  -4   0  111.86    5.24
  -4  -4   0  106.83    5.08
   4  -4   0  104.38    5.06
  -4  -4   0  100.84    5.12
  -4  -4   0  106.26    5.11
   4  -4   0  110.13    5.06
   4  -4   0  108.97    5.10
  -4  -4   0  106.00    5.12
  -4  -4   0  110.10    5.06
  -4  -4   0  106.05    5.11
   4   4   0  109.25    5.08
  -4   4   0  108.83    5.04
   4   4   0  107.61    5.08
  -4   4   0  108.26    5.09
  -4   4   0  104.83    5.18
   4   4   0  107.57    5.09
   4   4   0  109.42    5.05
  -4   4   0  105.48    5.08
   4   4   0  104.66    5.10
   4   4   0  104.08    5.08
   5  -4   0   11.24    0.68
  -5  -4   0   10.82    0.63
  -5  -4   0   10.77    0.76
  -5  -4   0   10.79    0.70
   5  -4   0   11.46    0.72
   5  -4   0   10.59    0.73
   5  -4   0   11.33    0.68
  -5  -4   0   11.03    0.78
  -5  -4   0   11.00    0.88
  -5  -4   0   10.49    0.77
   5   4   0   11.15    0.71
   5   4   0   10.78    0.70
   5   4   0   11.06    0.73
  -5   4   0    9.82    0.69
   5   4   0   10.05    0.70
  -5   4   0   12.55    0.85
  -5   4   0   10.61    0.71
   5   4   0   11.50    0.75
   6  -4   0   65.99    3.17
  -6  -4   0   65.04    3.18
  -6  -4   0   63.73    3.22
   6  -4   0   63.84    3.22
  -6  -4   0   64.42    3.12
  -6  -4   0   63.71    3.40
   6  -4   0   62.42    3.19
   6  -4   0   66.58    3.21
  -6  -4   0   64.60    3.26
  -6   4   0   68.44    3.36
   6   4   0   62.70    3.22
   6   4   0   65.97    3.19
   6   4   0   67.26    3.21
  -6   4   0   63.49    3.21
   6   4   0   67.52    3.23
  -6   4   0   66.41    3.18
  -7  -4   0    1.72    0.48
   7  -4   0    2.71    0.43
   7  -4   0    2.11    0.41
  -7  -4   0    2.89    0.49
  -7  -4   0    2.27    0.37
  -7  -4   0    2.99    0.60
   7  -4   0    2.47    0.36
  -7  -4   0    2.58    0.30
   7   4   0    1.97    0.40
   7   4   0    2.39    0.38
  -7   4   0    2.50    0.40
  -7   4   0    2.63    0.38
   7   4   0    2.46    0.43
   7   4   0    2.59    0.44
  -7   4   0    1.92    0.43
  -7   4   0    2.11    0.51
   8  -4   0   95.61    4.63
  -8  -4   0   91.38    4.67
  -8  -4   0   96.64    4.50
   8  -4   0   92.79    4.58
  -8  -4   0   97.11    4.90
   8  -4   0   94.76    4.65
  -8  -4   0   93.98    4.64
   8   4   0   94.95    4.63
   8   4   0   92.56    4.65
   8   4   0   89.72    4.58
  -8   4   0   96.92    4.82
  -8   4   0   96.66    4.57
  -8   4   0   95.44    4.64
   8   4   0   92.19    4.64
   9  -4   0   14.64    1.09
  -9  -4   0   13.95    1.32
  -9  -4   0   14.37    1.14
  -9  -4   0   14.75    1.13
   9  -4   0   14.96    0.99
   9  -4   0   15.22    1.07
   9   4   0   14.53    1.08
  -9   4   0   13.24    1.24
  -9   4   0   15.30    0.98
  -9   4   0   14.41    1.08
   9   4   0   14.85    1.08
  -9   4   0   14.84    1.40
   9   4   0   14.77    1.01
 -10  -4   0   30.33    2.03
  10  -4   0   27.80    2.19
  10  -4   0   26.72    1.68
 -10  -4   0   26.31    1.73
  10  -4   0   28.37    1.64
 -10  -4   0   30.60    1.80
  10   4   0   26.49    1.64
  10   4   0   28.23    1.74
 -10   4   0   29.16    1.73
 -10   4   0   27.57    1.90
 -10   4   0   28.80    1.59
  10   4   0   28.07    1.71
  11  -4   0   -0.62    0.46
  11  -4   0   -0.52    0.49
 -11  -4   0   -0.74    0.65
 -11  -4   0   -0.45    0.62
 -11  -4   0   -0.64    0.69
 -11   4   0    0.12    0.59
  11   4   0   -0.10    0.46
 -11   4   0    0.15    0.41
 -11   4   0   -0.30    0.60
  11   4   0   -0.33    0.53
 -12  -4   0   -0.60    0.74
  12  -4   0   -0.19    0.54
 -12  -4   0   -1.73    0.69
  12  -4   0   -0.77    0.57
 -12  -4   0   -0.79    0.62
 -12   4   0    0.52    0.70
 -12   4   0   -0.32    0.41
  12   4   0   -0.09    0.53
  12   4   0   -1.03    0.59
 -12   4   0   -0.14    0.69
  13  -4   0    0.57    0.64
 -13  -4   0    0.27    0.84
  13  -4   0    0.40    0.66
 -13  -4   0    0.46    0.75
 -13  -4   0    0.08    0.82
 -13   4   0    0.08    0.79
 -13   4   0   -0.16    0.72
  13   4   0   -0.80    0.69
  13   4   0   -0.92    0.58
  14  -4   0   25.87    1.84
 -14  -4   0   23.99    1.92
  14  -4   0   26.55    1.80
 -14  -4   0   23.61    2.22
 -14   4   0   28.00    1.83
  14   4   0   21.63    1.84
 -14   4   0   26.25    2.08
  14   4   0   22.15    1.77
 -15  -4   0    4.40    1.15
  15  -4   0    4.28    0.96
 -15  -4   0    5.81    1.33
  15  -4   0    6.95    1.09
  15   4   0    5.86    1.10
 -15   4   0    5.68    1.23
 -15   4   0    6.97    1.10
 -15   4   0    4.35    1.46
  15   4   0    5.22    0.98
  16  -4   0    0.22    0.91
 -16  -4   0    3.26    1.07
 -16  -4   0    1.19    1.19
  16  -4   0    0.85    0.84
 -16   4   0    2.19    0.97
  16   4   0    1.72    1.03
  16   4   0    1.29    0.89
  17  -4   0    4.30    1.13
  17  -4   0    2.35    1.05
 -17  -4   0    2.08    1.10
 -17  -4   0    3.09    1.89
 -17   4   0    3.06    1.05
  17   4   0    3.11    1.09
  17   4   0    5.62    1.27
  18  -4   0   -1.13    0.96
 -18  -4   0    1.84    1.13
  18  -4   0    1.82    1.08
 -18   4   0    0.56    1.02
  18   4   0    0.19    1.19
  18   4   0    0.81    1.09
 -19  -4   0   -0.82    1.08
  19  -4   0    0.91    1.14
  19   4   0   -0.24    1.13
 -19   4   0   -2.03    0.97
   0  -5   0    0.07    0.16
   0  -5   0    0.22    0.15
   0  -5   0   -0.03    0.15
   0   5   0    0.11    0.14
   0   5   0   -0.03    0.14
   0   5   0    0.02    0.14
   0   5   0    0.06    0.14
   1  -5   0   37.93    1.83
   1  -5   0   38.62    1.84
  -1  -5   0   38.51    1.85
   1  -5   0   38.63    1.83
  -1  -5   0   39.33    1.85
   1   5   0   37.11    1.84
   1   5   0   36.34    1.83
   1   5   0   36.61    1.82
   1   5   0   38.08    1.84
  -1   5   0   36.70    1.82
   1   5   0   39.08    1.84
  -1   5   0   37.87    1.84
  -1   5   0   39.09    1.83
   2  -5   0   96.64    4.55
  -2  -5   0   92.73    4.51
   2  -5   0   95.51    4.55
   2  -5   0  100.56    4.54
  -2  -5   0   95.08    4.56
   2  -5   0   97.15    4.53
  -2   5   0   99.12    4.53
   2   5   0   93.56    4.56
   2   5   0   95.83    4.53
  -2   5   0   96.18    4.55
   2   5   0   99.13    4.55
   2   5   0   90.84    4.55
   2   5   0   94.00    4.52
   2   5   0  101.00    4.57
  -3  -5   0    0.31    0.25
  -3  -5   0    1.13    0.24
   3  -5   0    1.25    0.25
   3  -5   0    1.45    0.20
   3  -5   0    1.29    0.24
   3  -5   0    1.30    0.23
   3   5   0    0.83    0.20
  -3   5   0    0.99    0.22
   3   5   0    0.56    0.21
   3   5   0    1.16    0.25
  -3   5   0    0.69    0.30
   3   5   0    0.90    0.21
   3   5   0    1.20    0.25
   3   5   0    0.86    0.22
  -3   5   0    1.41    0.21
   4  -5   0   45.37    2.24
  -4  -5   0   45.49    2.21
  -4  -5   0   45.64    2.25
  -4  -5   0   47.72    2.40
   4  -5   0   46.05    2.20
   4  -5   0   44.42    2.21
   4  -5   0   44.62    2.24
  -4  -5   0   45.18    2.23
  -4  -5   0   44.74    2.17
  -4  -5   0   43.91    2.26
   4   5   0   46.85    2.23
  -4   5   0   43.65    2.23
   4   5   0   43.50    2.23
   4   5   0   43.59    2.22
   4   5   0   45.36    2.19
   4   5   0   46.28    2.24
  -4   5   0   45.52    2.18
   4   5   0   43.76    2.25
  -4   5   0   46.42    2.22
  -4   5   0   45.09    2.33
  -5  -5   0   20.11    1.20
  -5  -5   0   21.64    1.11
  -5  -5   0   21.05    1.21
   5  -5   0   21.03    1.13
   5  -5   0   20.77    1.17
  -5  -5   0   21.70    1.15
   5  -5   0   21.28    1.12
  -5  -5   0   20.94    1.35
  -5  -5   0   20.99    1.07
  -5  -5   0   21.25    1.20
   5  -5   0   20.36    1.17
  -5   5   0   21.71    1.30
   5   5   0   20.47    1.16
   5   5   0   19.20    1.15
  -5   5   0   20.44    1.14
  -5   5   0   19.80    1.15
  -5   5   0   22.43    1.27
  -5   5   0   22.43    1.08
   5   5   0   21.03    1.18
   5   5   0   18.93    1.14
   5   5   0   21.06    1.12
  -6  -5   0   25.75    1.47
   6  -5   0   24.59    1.42
  -6  -5   0   25.27    1.62
   6  -5   0   26.22    1.42
  -6  -5   0   26.04    1.31
   6  -5   0   26.79    1.38
  -6  -5   0   24.22    1.44
  -6  -5   0   25.83    1.40
   6   5   0   26.51    1.44
  -6   5   0   26.81    1.55
   6   5   0   25.22    1.41
   6   5   0   26.03    1.40
   6   5   0   26.53    1.43
  -6   5   0   24.09    1.39
  -6   5   0   26.86    1.42
  -7  -5   0    3.32    0.43
   7  -5   0    2.58    0.44
  -7  -5   0    2.56    0.49
  -7  -5   0    3.49    0.65
   7  -5   0    2.61    0.38
  -7  -5   0    2.54    0.32
  -7  -5   0    3.43    0.56
   7  -5   0    3.31    0.46
  -7   5   0    2.62    0.53
  -7   5   0    2.99    0.41
   7   5   0    2.66    0.46
  -7   5   0    3.65    0.50
   7   5   0    2.75    0.45
   7   5   0    2.66    0.41
   7   5   0    2.84    0.43
   8  -5   0   47.39    2.41
  -8  -5   0   47.07    2.31
   8  -5   0   45.10    2.47
  -8  -5   0   48.52    2.53
  -8  -5   0   45.49    2.47
  -8  -5   0   48.52    2.40
   8  -5   0   47.37    2.45
  -8  -5   0   48.19    2.74
   8   5   0   46.82    2.45
   8   5   0   47.41    2.49
  -8   5   0   46.56    2.46
   8   5   0   47.02    2.48
  -8   5   0   46.05    2.44
   8   5   0   45.06    2.42
  -8   5   0   49.71    2.64
  -8   5   0   47.04    2.41
   9  -5   0   13.67    0.97
  -9  -5   0   15.42    1.34
  -9  -5   0   12.83    1.07
   9  -5   0   13.00    1.01
  -9  -5   0   12.75    1.12
   9  -5   0   13.07    1.06
  -9   5   0   14.61    1.05
  -9   5   0   13.04    0.95
   9   5   0   14.28    1.06
   9   5   0   13.37    0.98
  -9   5   0   12.44    1.32
  -9   5   0   13.72    1.20
   9   5   0   14.59    1.07
   9   5   0   14.30    1.04
  10  -5   0   37.35    2.05
 -10  -5   0   34.66    2.41
  10  -5   0   39.54    2.11
 -10  -5   0   37.72    2.20
 -10  -5   0   38.00    2.15
  10   5   0   37.07    2.13
  10   5   0   33.80    2.06
  10   5   0   35.46    2.13
 -10   5   0   41.86    2.15
 -10   5   0   37.80    2.01
  11  -5   0    1.13    0.55
 -11  -5   0    0.75    0.62
  11  -5   0    0.57    0.52
 -11  -5   0   -0.51    0.65
 -11  -5   0    1.01    0.78
  11   5   0    0.58    0.50
 -11   5   0    0.29    0.61
 -11   5   0    0.89    0.44
  11   5   0    0.87    0.58
 -11   5   0    0.44    0.63
 -12  -5   0    0.92    0.67
  12  -5   0   -0.24    0.59
 -12  -5   0   -0.15    0.80
  12  -5   0   -0.44    0.55
 -12  -5   0   -0.46    0.76
 -12   5   0   -0.10    0.63
 -12   5   0   -0.81    0.65
  12   5   0   -0.82    0.59
  12   5   0    0.18    0.54
 -12   5   0   -0.02    0.48
 -13  -5   0    0.49    0.75
  13  -5   0   -0.31    0.65
  13  -5   0    0.09    0.63
 -13  -5   0    0.00    0.83
 -13  -5   0   -1.21    0.84
  13   5   0   -0.97    0.67
 -13   5   0    0.14    0.78
  13   5   0   -0.20    0.62
 -13   5   0   -0.17    0.68
  14  -5   0    5.92    0.92
 -14  -5   0    4.19    1.07
 -14  -5   0    4.17    1.24
  14  -5   0    5.73    0.93
 -14   5   0    2.77    0.98
  14   5   0    3.16    0.98
  14   5   0    3.86    0.87
 -14   5   0    5.72    0.95
  15  -5   0    1.23    0.84
 -15  -5   0    1.06    0.99
  15  -5   0   -0.21    0.79
 -15  -5   0    1.68    1.10
  15   5   0   -0.31    0.88
 -15   5   0    1.38    0.86
  15   5   0    0.44    0.82
  16  -5   0   19.73    1.79
  16  -5   0   16.64    1.60
 -16  -5   0   18.01    2.09
 -16  -5   0   16.96    1.75
  16   5   0   19.63    1.79
 -16   5   0   15.75    1.59
 -16   5   0   15.73    1.83
  16   5   0   16.96    1.60
 -17  -5   0    1.62    1.56
  17  -5   0    1.22    1.00
 -17  -5   0    0.65    1.04
  17  -5   0    2.67    1.02
 -17   5   0    1.37    0.99
  17   5   0    1.98    1.07
  17   5   0    1.58    1.03
  18  -5   0    8.06    1.50
 -18  -5   0    8.30    1.41
  18  -5   0    9.57    1.43
  18   5   0    8.25    1.55
 -18   5   0    7.89    1.34
  18   5   0   10.33    1.47
  19  -5   0    1.56    1.07
 -19  -5   0   -1.31    1.09
 -19   5   0    1.13    1.11
  19   5   0    0.02    1.11
   0  -6   0  335.50   15.72
   0  -6   0  346.03   15.73
   0  -6   0  351.95   15.72
   0  -6   0  329.11   15.73
   0   6   0  361.49   15.74
   0   6   0  331.38   15.72
   0   6   0  333.57   15.72
   0   6   0  310.87   15.71
   1  -6   0   46.24    2.16
   1  -6   0   44.09    2.17
  -1  -6   0   45.46    2.17
   1  -6   0   46.29    2.15
  -1  -6   0   45.23    2.18
   1  -6   0   45.17    2.16
   1   6   0   41.96    2.15
   1   6   0   43.55    2.15
  -1   6   0   45.81    2.16
   1   6   0   41.96    2.22
   1   6   0   46.09    2.17
  -1   6   0   45.38    2.15
   1   6   0   47.15    2.17
  -1   6   0   42.91    2.15
  -2  -6   0   30.37    1.57
   2  -6   0   32.65    1.60
  -2  -6   0   32.10    1.56
   2  -6   0   32.88    1.58
   2  -6   0   32.22    1.59
  -2  -6   0   32.34    1.61
   2  -6   0   33.98    1.61
  -2   6   0   30.84    1.60
   2   6   0   31.57    1.60
  -2   6   0   33.55    1.66
  -2   6   0   32.89    1.58
   2   6   0   31.81    1.60
   2   6   0   31.43    1.57
   2   6   0   33.05    1.61
   2   6   0   31.28    1.58
   2   6   0   32.92    1.63
  -3  -6   0   45.43    2.46
   3  -6   0   40.18    2.00
  -3  -6   0   39.93    1.95
   3  -6   0   41.72    2.01
   3  -6   0   39.99    1.99
   3  -6   0   41.76    1.98
  -3  -6   0   40.02    2.02
  -3  -6   0   38.20    2.01
   3   6   0   40.06    1.97
   3   6   0   38.72    2.00
   3   6   0   39.57    1.98
   3   6   0   41.20    2.02
  -3   6   0   42.07    1.97
  -3   6   0   41.41    2.09
   3   6   0   39.16    2.00
   3   6   0   39.94    2.00
   3   6   0   41.82    2.02
  -3   6   0   40.00    2.01
  -4  -6   0   46.98    2.26
  -4  -6   0   50.21    2.51
   4  -6   0   46.41    2.31
   4  -6   0   49.80    2.30
  -4  -6   0   45.89    2.33
  -4  -6   0   42.94    2.35
  -4  -6   0   48.92    2.35
   4  -6   0   46.89    2.33
   4  -6   0   47.15    2.33
  -4   6   0   47.33    2.33
  -4   6   0   46.77    2.30
   4   6   0   48.05    2.35
  -4   6   0   45.40    2.42
   4   6   0   44.82    2.33
   4   6   0   47.92    2.34
   4   6   0   47.19    2.29
   4   6   0   45.55    2.32
  -4   6   0   46.64    2.27
   4   6   0   48.39    2.33
  -5  -6   0    1.10    0.34
   5  -6   0    0.88    0.29
  -5  -6   0    0.57    0.23
  -5  -6   0    0.47    0.28
  -5  -6   0    0.89    0.44
   5  -6   0    1.03    0.29
   5  -6   0    0.72    0.31
   5  -6   0    0.77    0.24
  -5  -6   0    0.87    0.34
  -5  -6   0    0.70    0.21
   5   6   0    0.45    0.29
   5   6   0    0.68    0.28
   5   6   0    0.50    0.28
  -5   6   0    0.60    0.39
   5   6   0    0.42    0.25
  -5   6   0    0.52    0.26
  -5   6   0    1.16    0.29
   5   6   0    1.24    0.30
  -5   6   0    0.64    0.22
   5   6   0    0.95    0.25
  -5   6   0    1.56    0.35
  -6  -6   0   82.26    4.16
  -6  -6   0   86.98    4.36
   6  -6   0   87.47    4.13
  -6  -6   0   85.69    4.11
  -6  -6   0   84.47    4.16
  -6  -6   0   83.17    4.02
  -6  -6   0   80.82    4.17
   6  -6   0   85.60    4.13
   6  -6   0   81.46    4.08
  -6  -6   0   86.00    4.07
  -6   6   0   85.29    4.03
  -6   6   0   87.44    4.11
   6   6   0   82.40    4.11
   6   6   0   81.60    4.14
  -6   6   0   83.26    4.10
  -6   6   0   87.18    4.28
  -6   6   0   88.45    4.26
   6   6   0   84.24    4.13
   6   6   0   86.55    4.12
   7  -6   0   22.45    1.22
  -7  -6   0   20.94    1.13
   7  -6   0   21.21    1.28
  -7  -6   0   20.61    1.22
   7  -6   0   22.20    1.27
  -7  -6   0   21.34    1.51
  -7  -6   0   21.66    1.31
  -7  -6   0   21.27    1.33
   7   6   0   21.99    1.30
  -7   6   0   21.59    1.25
  -7   6   0   22.56    1.24
   7   6   0   19.53    1.25
  -7   6   0   22.68    1.40
   7   6   0   22.98    1.26
   7   6   0   19.24    1.27
  -8  -6   0   50.39    2.58
   8  -6   0   50.58    2.68
   8  -6   0   51.73    2.76
   8  -6   0   50.85    2.72
  -8  -6   0   56.04    2.70
  -8  -6   0   52.86    2.79
  -8  -6   0   55.40    3.04
  -8  -6   0   52.38    2.76
  -8   6   0   49.01    2.71
  -8   6   0   56.28    2.90
   8   6   0   54.08    2.77
   8   6   0   50.94    2.75
   8   6   0   54.11    2.73
  -8   6   0   52.70    2.69
   8   6   0   54.88    2.71
  -8   6   0   57.72    2.74
  -9  -6   0    3.92    0.64
  -9  -6   0    1.87    0.62
  -9  -6   0    2.47    0.76
   9  -6   0    3.22    0.51
   9  -6   0    3.35    0.56
   9  -6   0    2.72    0.51
  -9   6   0    2.58    0.56
  -9   6   0    3.37    0.65
   9   6   0    2.35    0.51
   9   6   0    3.88    0.54
  -9   6   0    2.98    0.49
  -9   6   0    3.09    0.80
   9   6   0    2.74    0.55
  -9   6   0    1.55    0.47
   9   6   0    2.82    0.57
  10  -6   0    3.92    0.65
  10  -6   0    4.13    0.61
 -10  -6   0    4.93    0.93
 -10  -6   0    5.08    0.85
 -10  -6   0    4.35    0.73
 -10   6   0    4.89    0.71
  10   6   0    3.06    0.68
  10   6   0    3.36    0.66
 -10   6   0    4.51    0.59
 -10   6   0    4.23    0.78
  10   6   0    3.87    0.60
  10   6   0    4.89    0.70
 -11  -6   0    7.00    0.86
  11  -6   0    3.08    0.63
 -11  -6   0    4.69    0.98
 -11  -6   0    3.04    0.85
  11  -6   0    4.24    0.70
 -11   6   0    3.46    0.78
 -11   6   0    4.09    0.75
  11   6   0    3.14    0.71
 -11   6   0    5.17    0.63
  11   6   0    4.29    0.67
  12  -6   0    4.74    0.80
 -12  -6   0    6.59    0.97
 -12  -6   0    4.57    1.03
 -12  -6   0    6.43    1.14
  12  -6   0    6.65    0.88
  12   6   0    5.54    0.90
 -12   6   0    6.32    0.90
 -12   6   0    5.67    1.00
 -12   6   0    6.56    0.72
  12   6   0    5.39    0.81
  13  -6   0    9.02    1.02
 -13  -6   0   12.37    1.72
 -13  -6   0    7.58    1.35
  13  -6   0    8.16    0.99
 -13  -6   0    9.06    1.22
  13   6   0    6.80    0.96
 -13   6   0    6.31    1.07
 -13   6   0    8.42    1.03
  13   6   0    5.21    1.00
 -14  -6   0   12.89    1.68
  14  -6   0   13.37    1.29
 -14  -6   0   15.25    1.53
  14  -6   0   11.58    1.28
 -14   6   0   12.08    1.58
  14   6   0   12.87    1.37
  14   6   0   14.52    1.36
 -14   6   0   13.53    1.31
 -15  -6   0    3.71    1.30
 -15  -6   0    2.83    1.07
  15  -6   0    4.88    0.99
  15  -6   0    3.26    0.95
  15   6   0    4.92    1.11
  15   6   0    3.72    0.96
 -15   6   0    4.31    0.99
  16  -6   0    2.34    0.94
 -16  -6   0    1.95    1.05
 -16  -6   0   -0.31    1.17
  16  -6   0    2.22    1.02
  16   6   0    1.40    1.02
 -16   6   0    1.55    0.90
 -16   6   0    0.97    1.21
  16   6   0    1.44    0.91
 -17  -6   0    1.37    1.45
  17  -6   0   -0.44    0.93
  17  -6   0   -1.24    0.95
 -17  -6   0   -1.20    1.00
  17   6   0   -0.08    0.97
 -17   6   0    0.03    0.91
  17   6   0   -0.24    0.95
 -18  -6   0    0.92    1.10
  18  -6   0    1.98    1.12
  18   6   0    2.06    1.07
  18   6   0    0.11    1.24
 -18   6   0    0.74    1.00
  19  -6   0   -0.32    1.09
 -19  -6   0   -1.25    1.16
 -19   6   0   -0.28    1.05
  19   6   0   -0.53    1.12
   0  -7   0   -0.06    0.17
   0  -7   0    0.19    0.20
   0  -7   0    0.06    0.14
   0  -7   0    0.01    0.18
   0   7   0    0.14    0.18
   0   7   0   -0.01    0.17
   0   7   0   -0.03    0.16
   0   7   0    0.13    0.17
   0   7   0    0.01    0.17
   1  -7   0   74.91    3.55
   1  -7   0   77.21    3.54
   1  -7   0   76.01    3.55
  -1  -7   0   76.21    3.58
  -1  -7   0   73.59    3.53
  -1  -7   0   63.10    3.53
   1  -7   0   76.05    3.57
  -1  -7   0   77.50    3.57
  -1   7   0   74.47    3.55
   1   7   0   72.37    3.55
  -1   7   0   77.63    3.54
   1   7   0   78.95    3.57
   1   7   0   76.18    3.56
   1   7   0   74.44    3.55
  -1   7   0   70.91    3.54
   1   7   0   75.21    3.54
  -2  -7   0  150.67    7.36
  -2  -7   0  156.50    7.40
   2  -7   0  162.61    7.38
   2  -7   0  159.74    7.39
   2  -7   0  159.49    7.40
  -2  -7   0  157.78    7.41
  -2  -7   0  150.96    7.36
   2  -7   0  158.97    7.39
   2   7   0  149.21    7.39
   2   7   0  160.48    7.40
  -2   7   0  150.79    7.37
   2   7   0  146.35    7.38
   2   7   0  165.92    7.41
  -2   7   0  159.73    7.38
  -2   7   0  163.60    7.45
  -2   7   0  158.44    7.40
   2   7   0  151.96    7.37
   2   7   0  168.26    7.45
   3  -7   0   82.73    3.90
  -3  -7   0   89.54    4.07
  -3  -7   0   83.08    3.96
  -3  -7   0   80.33    3.92
  -3  -7   0   76.71    3.91
  -3  -7   0   77.39    3.86
   3  -7   0   83.08    3.89
   3  -7   0   80.90    3.91
   3  -7   0   83.38    3.90
  -3   7   0   83.78    3.99
   3   7   0   84.15    3.94
   3   7   0   79.08    3.92
   3   7   0   81.98    3.89
  -3   7   0   83.35    3.87
   3   7   0   81.40    3.91
  -3   7   0   83.32    3.92
   3   7   0   77.29    3.91
   3   7   0   83.12    3.88
   3   7   0   77.84    3.91
   4  -7   0   11.27    0.74
   4  -7   0   11.39    0.68
   4  -7   0   10.85    0.72
  -4  -7   0   12.35    0.75
   4  -7   0   10.04    0.70
  -4  -7   0   11.17    0.89
  -4  -7   0   10.42    0.74
  -4  -7   0   11.00    0.63
  -4  -7   0   11.36    0.74
  -4   7   0   11.57    0.66
  -4   7   0   10.73    0.84
   4   7   0   12.23    0.76
   4   7   0   11.72    0.75
   4   7   0   10.66    0.68
   4   7   0   10.47    0.71
   4   7   0   12.15    0.72
  -4   7   0   10.88    0.67
   4   7   0   10.43    0.73
  -4   7   0   11.56    0.72
  -5  -7   0    2.97    0.58
  -5  -7   0    3.22    0.49
  -5  -7   0    3.46    0.44
  -5  -7   0    2.86    0.41
   5  -7   0    3.16    0.40
  -5  -7   0    2.44    0.29
   5  -7   0    2.73    0.42
   5  -7   0    3.35    0.41
   5  -7   0    2.83    0.34
   5   7   0    2.42    0.38
   5   7   0    3.06    0.44
   5   7   0    2.60    0.35
  -5   7   0    3.09    0.46
  -5   7   0    3.37    0.33
   5   7   0    3.09    0.42
  -5   7   0    2.79    0.39
   5   7   0    2.46    0.38
  -5   7   0    3.04    0.38
  -5   7   0    3.57    0.54
   6  -7   0   42.27    2.13
  -6  -7   0   41.53    2.20
  -6  -7   0   41.34    2.05
  -6  -7   0   42.54    2.15
   6  -7   0   42.56    2.17
   6  -7   0   41.11    2.17
  -6  -7   0   43.58    2.41
  -6  -7   0   40.46    2.20
  -6   7   0   43.34    2.14
  -6   7   0   44.26    2.29
   6   7   0   40.23    2.14
   6   7   0   41.16    2.12
  -6   7   0   39.50    2.30
   6   7   0   40.00    2.18
   6   7   0   41.44    2.17
  -6   7   0   42.31    2.06
   6   7   0   43.39    2.17
  -6   7   0   44.36    2.16
  -7  -7   0    1.02    0.57
   7  -7   0    1.37    0.47
   7  -7   0    1.04    0.34
   7  -7   0    1.16    0.38
   7  -7   0    1.26    0.42
  -7  -7   0    1.28    0.38
  -7  -7   0    0.99    0.46
   7   7   0    1.04    0.38
   7   7   0    1.30    0.40
  -7   7   0    1.36    0.38
   7   7   0    1.35    0.35
  -7   7   0    1.56    0.40
  -7   7   0    1.32    0.45
   7   7   0    1.67    0.40
  -8  -7   0   36.63    2.26
   8  -7   0   33.98    1.98
  -8  -7   0   36.02    1.91
  -8  -7   0   35.99    2.01
   8  -7   0   37.39    1.96
   8  -7   0   36.61    1.97
  -8  -7   0   36.53    2.03
   8  -7   0   34.23    1.90
   8   7   0   33.94    1.95
  -8   7   0   38.17    1.95
  -8   7   0   34.55    1.91
   8   7   0   36.00    1.98
   8   7   0   35.16    1.98
   8   7   0   35.59    1.94
  -8   7   0   36.19    2.11
  -9  -7   0    2.26    0.45
   9  -7   0    2.76    0.56
  -9  -7   0    3.46    0.61
   9  -7   0    3.04    0.49
   9  -7   0    1.60    0.50
  -9  -7   0    2.17    0.75
  -9  -7   0    2.49    0.67
   9  -7   0    2.99    0.80
  -9   7   0    1.74    0.49
   9   7   0    1.58    0.47
  -9   7   0    2.79    1.10
  -9   7   0    2.04    0.46
   9   7   0    2.41    0.54
  -9   7   0    3.37    0.65
   9   7   0    2.27    0.53
  -9   7   0    2.64    0.54
   9   7   0    2.77    0.57
  10  -7   0   21.83    1.44
  10  -7   0   22.50    1.40
 -10  -7   0   20.83    1.77
 -10  -7   0   19.78    1.55
  10  -7   0   21.94    1.48
 -10  -7   0   23.32    1.52
  10   7   0   19.17    1.43
  10   7   0   24.63    1.55
  10   7   0   20.23    1.49
 -10   7   0   23.45    1.45
 -10   7   0   21.64    1.59
 -10   7   0   21.99    1.36
 -10   7   0   23.37    1.43
  10   7   0   21.64    1.41
  11  -7   0   17.54    1.32
 -11  -7   0   16.38    1.63
  11  -7   0   17.93    1.26
 -11  -7   0   17.34    1.37
 -11  -7   0   15.86    1.42
 -11   7   0   17.17    1.46
 -11   7   0   17.90    1.31
 -11   7   0   19.65    1.22
  11   7   0   16.01    1.33
  11   7   0   15.96    1.37
  11   7   0   16.29    1.27
 -12  -7   0    4.99    1.00
  12  -7   0    3.05    0.75
  12  -7   0    6.05    0.85
 -12  -7   0    6.27    0.94
 -12  -7   0    5.63    1.16
 -12   7   0    6.83    0.90
  12   7   0    3.99    0.85
 -12   7   0    6.74    0.75
  12   7   0    5.75    0.82
 -12   7   0    4.95    0.96
 -13  -7   0   14.06    1.48
  13  -7   0   13.11    1.25
  13  -7   0   11.65    1.22
 -13  -7   0   14.36    1.69
 -13   7   0   14.62    1.33
  13   7   0   13.17    1.38
 -13   7   0   16.46    1.53
  13   7   0   13.80    1.28
 -14  -7   0    2.44    1.00
  14  -7   0    0.77    0.74
 -14  -7   0    0.58    1.02
  14  -7   0    1.34    0.77
  14   7   0    1.11    0.84
 -14   7   0    1.05    0.77
  14   7   0    1.16    0.78
 -15  -7   0    3.67    1.32
  15  -7   0    2.98    0.94
  15  -7   0    5.18    0.99
 -15  -7   0    2.85    1.07
 -15   7   0    4.54    0.98
  15   7   0    3.00    1.01
  15   7   0    3.72    0.97
 -16  -7   0   13.96    1.92
 -16  -7   0   13.32    1.57
  16  -7   0   14.12    1.52
  16  -7   0   13.01    1.47
  16   7   0   15.00    1.60
  16   7   0   14.20    1.49
 -16   7   0   14.42    1.47
 -17  -7   0    0.89    1.56
  17  -7   0    1.16    1.00
  17  -7   0    1.31    1.05
 -17  -7   0    0.03    1.06
 -17   7   0   -0.99    0.89
  17   7   0    0.64    1.06
  17   7   0   -0.46    0.94
  18  -7   0    2.85    1.17
 -18  -7   0    2.57    1.28
 -18   7   0    1.68    1.08
  18   7   0    3.38    1.20
  19  -7   0   -1.36    1.01
 -19  -7   0   -0.56    1.20
 -19   7   0   -0.94    1.04
  19   7   0    1.11    1.17
   0  -8   0  293.66   13.62
   0  -8   0  300.31   13.63
   0  -8   0  292.21   13.61
   0  -8   0  288.15   13.64
   0   8   0  304.69   13.64
   0   8   0  294.65   13.62
   0   8   0  278.31   13.62
   0   8   0  281.05   13.62
   1  -8   0  174.22    8.14
   1  -8   0  175.44    8.12
   1  -8   0  174.23    8.11
  -1  -8   0  172.45    8.10
  -1  -8   0  170.63    8.15
   1  -8   0  175.86    8.12
  -1  -8   0  175.17    8.14
  -1  -8   0  160.85    8.10
   1   8   0  164.75    8.12
  -1   8   0  173.59    8.12
  -1   8   0  179.12    8.14
   1   8   0  170.93    8.13
   1   8   0  174.93    8.11
  -1   8   0  172.80    8.11
   1   8   0  180.37    8.14
   1   8   0  179.86    8.15
  -1   8   0  168.07    8.12
  -2  -8   0   76.07    3.80
   2  -8   0   81.46    3.76
  -2  -8   0   75.11    3.74
   2  -8   0   80.48    3.77
   2  -8   0   80.24    3.77
  -2  -8   0   79.45    3.80
  -2  -8   0   79.34    3.78
   2  -8   0   79.95    3.78
  -2   8   0   79.64    3.78
   2   8   0   79.57    3.75
  -2   8   0   80.81    3.76
   2   8   0   81.07    3.79
   2   8   0   79.06    3.83
   2   8   0   75.04    3.76
  -2   8   0   81.03    3.84
  -2   8   0   77.18    3.76
   2   8   0   78.91    3.78
   2   8   0   77.17    3.78
  -3  -8   0    0.02    0.26
  -3  -8   0    0.72    0.24
   3  -8   0    0.29    0.24
   3  -8   0    0.26    0.24
  -3  -8   0    0.31    0.17
  -3  -8   0   -0.04    0.32
   3  -8   0    0.25    0.20
  -3  -8   0    0.17    0.27
   3  -8   0    0.40    0.25
  -3   8   0    0.56    0.21
   3   8   0    0.09    0.21
   3   8   0    0.69    0.28
   3   8   0    0.48    0.25
   3   8   0    0.27    0.22
   3   8   0    0.28    0.21
   3   8   0    0.30    0.25
  -3   8   0    0.26    0.26
  -3   8   0    0.21    0.28
   3   8   0    0.14    0.23
  -4  -8   0    8.57    0.78
  -4  -8   0    7.34    0.49
  -4  -8   0    6.83    0.61
  -4  -8   0    6.83    0.61
   4  -8   0    6.89    0.58
   4  -8   0    7.72    0.59
   4  -8   0    7.51    0.53
  -4  -8   0    7.88    0.60
   4  -8   0    7.36    0.60
   4   8   0    7.57    0.61
   4   8   0    7.67    0.62
   4   8   0    7.53    0.55
   4   8   0    6.69    0.58
  -4   8   0    7.40    0.50
  -4   8   0    7.71    0.63
   4   8   0    6.44    0.54
   4   8   0    7.97    0.58
  -4   8   0    7.15    0.70
  -4   8   0    8.14    0.53
   4   8   0    7.45    0.58
   5  -8   0    0.93    0.32
   5  -8   0    0.61    0.34
  -5  -8   0    1.15    0.48
  -5  -8   0    1.04    0.38
   5  -8   0    0.87    0.26
  -5  -8   0    1.21    0.33
  -5  -8   0    0.94    0.35
   5  -8   0    0.46    0.30
  -5  -8   0    0.59    0.23
  -5   8   0    0.83    0.30
  -5   8   0    0.90    0.25
   5   8   0    0.92    0.32
  -5   8   0    0.90    0.42
   5   8   0    1.34    0.36
   5   8   0    0.83    0.28
  -5   8   0    1.18    0.35
   5   8   0    0.72    0.33
   5   8   0    0.92    0.30
  -5   8   0    0.94    0.29
  -6  -8   0    5.34    0.64
   6  -8   0    5.11    0.54
  -6  -8   0    5.00    0.41
   6  -8   0    4.17    0.47
  -6  -8   0    4.76    0.52
  -6  -8   0    5.28    0.59
   6  -8   0    5.99    0.60
  -6  -8   0    5.06    0.73
   6   8   0    5.21    0.55
  -6   8   0    5.60    0.72
   6   8   0    6.29    0.59
  -6   8   0    4.48    0.60
  -6   8   0    4.89    0.52
   6   8   0    4.89    0.50
  -6   8   0    5.42    0.45
  -6   8   0    6.05    0.54
   6   8   0    4.77    0.55
   6   8   0    5.87    0.55
   7  -8   0    7.99    0.68
  -7  -8   0    7.11    0.67
  -7  -8   0    9.70    0.86
   7  -8   0    9.26    0.76
  -7  -8   0    8.08    0.97
  -7  -8   0    7.32    0.56
  -7  -8   0    7.52    0.75
   7  -8   0    7.99    0.72
   7   8   0    8.23    0.74
   7   8   0    8.30    0.70
   7   8   0    7.39    0.72
  -7   8   0    8.80    0.93
  -7   8   0    8.43    0.71
  -7   8   0    7.99    0.58
  -7   8   0    8.01    0.69
   7   8   0    8.82    0.77
  -7   8   0    8.03    0.79
   8  -8   0    0.33    0.44
   8  -8   0   -0.33    0.38
   8  -8   0    0.04    0.35
  -8  -8   0   -0.52    0.49
  -8  -8   0   -0.34    0.55
   8  -8   0   -0.08    0.44
  -8  -8   0   -0.11    0.36
  -8   8   0    0.30    0.38
   8   8   0    0.05    0.35
  -8   8   0   -0.06    0.43
  -8   8   0    0.07    0.38
   8   8   0   -0.39    0.37
   8   8   0    0.41    0.41
   8   8   0    0.00    0.39
   9  -8   0   -0.50    0.40
   9  -8   0    0.79    0.50
   9  -8   0    0.25    0.41
  -9  -8   0   -0.07    0.61
  -9  -8   0    0.83    0.41
  -9  -8   0   -0.39    0.57
  -9   8   0   -0.33    0.41
   9   8   0   -0.03    0.45
   9   8   0    0.20    0.48
  -9   8   0    0.93    0.43
   9   8   0    0.38    0.46
   9   8   0   -0.12    0.39
  -9   8   0    0.27    0.49
 -10  -8   0    4.65    0.86
 -10  -8   0    2.48    0.53
 -10  -8   0    3.78    0.74
  10  -8   0    5.02    0.75
  10  -8   0    3.70    0.61
 -10  -8   0    4.00    0.93
  10  -8   0    4.02    0.66
 -10   8   0    3.68    0.65
 -10   8   0    4.93    0.80
  10   8   0    4.49    0.63
 -10   8   0    3.52    0.64
  10   8   0    3.31    0.70
 -10   8   0    4.20    0.60
  10   8   0    4.64    0.71
 -11  -8   0    0.66    0.78
 -11  -8   0   -0.25    0.71
  11  -8   0    1.40    0.55
 -11  -8   0   -0.10    0.65
  11  -8   0   -0.34    0.53
  11   8   0    0.25    0.51
 -11   8   0    0.00    0.55
 -11   8   0    0.37    0.52
 -11   8   0    0.74    0.66
  11   8   0    0.45    0.58
  11   8   0    0.35    0.59
 -12  -8   0    2.78    0.85
  12  -8   0    1.43    0.66
 -12  -8   0    3.71    1.07
  12  -8   0    1.61    0.69
 -12  -8   0    3.39    0.97
  12   8   0    3.29    0.70
 -12   8   0    2.63    0.61
 -12   8   0    2.15    0.81
  12   8   0    2.72    0.79
 -12   8   0    2.31    0.71
  12   8   0    4.34    0.86
 -13  -8   0    3.50    1.12
  13  -8   0    2.95    0.80
 -13  -8   0    2.72    1.03
  13  -8   0    2.57    0.77
  13   8   0    2.53    0.88
 -13   8   0    3.20    0.78
  13   8   0    2.78    0.78
 -13   8   0    2.86    1.33
 -13   8   0    2.48    0.85
 -14  -8   0    3.98    1.21
  14  -8   0    4.59    0.92
 -14  -8   0    3.69    1.09
  14  -8   0    3.27    0.86
 -14   8   0    4.15    0.91
  14   8   0    4.14    0.89
  14   8   0    3.71    1.00
 -15  -8   0    1.71    1.26
  15  -8   0    2.41    0.92
 -15  -8   0    1.59    1.06
  15  -8   0    3.61    0.97
  15   8   0    2.62    0.91
  15   8   0    1.88    0.96
 -15   8   0    3.21    0.89
 -16  -8   0    5.00    1.29
  16  -8   0    5.44    1.15
 -16  -8   0    5.36    1.51
  16  -8   0    6.70    1.18
  16   8   0    8.58    1.22
 -16   8   0    6.04    1.09
  16   8   0    6.82    1.25
 -17  -8   0    4.52    2.05
  17  -8   0    6.80    1.23
 -17  -8   0    4.33    1.32
  17  -8   0    5.16    1.22
  17   8   0    5.92    1.31
 -17   8   0    4.27    1.13
  17   8   0    7.48    1.24
 -18  -8   0   -0.03    1.15
  18  -8   0   -0.41    1.04
 -18   8   0    1.43    1.07
  18   8   0    0.37    1.08
 -19  -8   0    2.62    1.34
  19  -8   0    6.26    1.32
 -19   8   0    4.12    1.21
  19   8   0    4.97    1.34
   0  -9   0    0.26    0.21
   0  -9   0    0.10    0.17
   0  -9   0    0.42    0.24
   0  -9   0    0.33    0.24
   0   9   0   -0.06    0.19
   0   9   0    0.15    0.21
   0   9   0    0.07    0.20
   0   9   0    0.23    0.20
   0   9   0    0.02    0.20
  -1  -9   0    3.48    0.30
   1  -9   0    3.30    0.30
  -1  -9   0    2.87    0.35
  -1  -9   0    2.89    0.30
   1  -9   0    2.65    0.32
   1  -9   0    3.22    0.36
  -1  -9   0    2.89    0.35
   1  -9   0    3.05    0.33
   1   9   0    2.85    0.32
   1   9   0    2.05    0.32
   1   9   0    2.78    0.31
  -1   9   0    2.66    0.32
   1   9   0    2.81    0.33
  -1   9   0    3.13    0.33
   1   9   0    2.74    0.33
  -1   9   0    3.43    0.32
  -1   9   0    3.52    0.33
   2  -9   0    1.67    0.29
   2  -9   0    1.43    0.28
  -2  -9   0    1.62    0.28
  -2  -9   0    1.36    0.30
  -2  -9   0    1.84    0.51
  -2  -9   0    1.53    0.23
   2  -9   0    1.82    0.30
  -2  -9   0    1.50    0.25
  -2  -9   0    1.43    0.31
  -2  -9   0    1.05    0.21
   2  -9   0    1.68    0.25
  -2   9   0    1.62    0.29
   2   9   0    1.54    0.29
   2   9   0    1.25    0.27
  -2   9   0    1.93    0.27
   2   9   0    1.63    0.29
   2   9   0    1.41    0.26
  -2   9   0    1.12    0.30
   2   9   0    1.82    0.29
  -2   9   0    1.31    0.25
   2   9   0    1.48    0.32
   3  -9   0    3.77    0.40
  -3  -9   0    3.47    0.42
  -3  -9   0    3.47    0.42
  -3  -9   0    3.99    0.39
  -3  -9   0    3.89    0.55
  -3  -9   0    3.40    0.32
   3  -9   0    3.61    0.41
   3  -9   0    3.96    0.37
   3  -9   0    4.24    0.42
  -3   9   0    3.71    0.43
  -3   9   0    4.48    0.38
   3   9   0    3.64    0.42
   3   9   0    3.85    0.47
   3   9   0    4.45    0.43
   3   9   0    3.97    0.40
   3   9   0    3.52    0.40
  -3   9   0    3.52    0.47
   3   9   0    3.33    0.36
   3   9   0    3.85    0.38
   4  -9   0   11.39    0.76
  -4  -9   0   10.20    0.64
  -4  -9   0    9.99    0.76
   4  -9   0   11.89    0.76
  -4  -9   0    9.56    0.77
   4  -9   0   10.95    0.70
   4  -9   0   11.25    0.76
  -4  -9   0   11.67    0.75
  -4  -9   0   12.40    0.95
   4   9   0   12.19    0.76
   4   9   0   10.89    0.76
   4   9   0   10.84    0.77
  -4   9   0   11.85    0.69
   4   9   0   10.61    0.72
  -4   9   0   11.06    0.66
   4   9   0   11.51    0.80
   4   9   0   10.84    0.71
  -4   9   0   11.69    0.79
  -4   9   0   11.26    0.88
  -5  -9   0   67.42    3.31
  -5  -9   0   70.22    3.54
  -5  -9   0   63.34    3.32
   5  -9   0   62.46    3.28
   5  -9   0   68.43    3.30
  -5  -9   0   65.37    3.21
   5  -9   0   64.54    3.26
   5  -9   0   68.20    3.31
  -5  -9   0   64.69    3.30
  -5   9   0   66.56    3.43
   5   9   0   66.37    3.31
   5   9   0   70.64    3.31
  -5   9   0   67.05    3.23
  -5   9   0   67.98    3.24
   5   9   0   69.92    3.33
   5   9   0   66.39    3.34
  -5   9   0   67.41    3.31
  -5   9   0   72.48    3.41
   5   9   0   66.01    3.27
   5   9   0   66.38    3.26
  -6  -9   0   21.71    1.17
   6  -9   0   22.69    1.31
   6  -9   0   21.64    1.25
  -6  -9   0   21.06    1.34
  -6  -9   0   23.39    1.56
  -6  -9   0   20.75    1.33
   6  -9   0   22.73    1.31
  -6  -9   0   23.74    1.31
  -6   9   0   23.76    1.24
   6   9   0   22.14    1.30
  -6   9   0   21.84    1.47
   6   9   0   22.81    1.32
  -6   9   0   22.11    1.29
   6   9   0   22.46    1.34
   6   9   0   22.62    1.33
  -6   9   0   22.80    1.20
  -6   9   0   23.63    1.41
   6   9   0   21.79    1.26
  -7  -9   0    0.86    0.44
  -7  -9   0    1.23    0.52
  -7  -9   0    1.26    0.56
   7  -9   0    1.39    0.42
  -7  -9   0    1.00    0.28
   7  -9   0    0.82    0.36
   7  -9   0    1.72    0.47
  -7  -9   0    1.43    0.40
  -7   9   0    1.09    0.38
   7   9   0    1.18    0.43
  -7   9   0    1.17    0.30
   7   9   0    0.51    0.40
   7   9   0    1.16    0.39
  -7   9   0    1.19    0.55
  -7   9   0    1.01    0.46
   7   9   0    0.92    0.44
  -7   9   0    1.84    0.43
   7   9   0    1.28    0.41
  -8  -9   0    6.26    0.64
   8  -9   0    5.26    0.67
  -8  -9   0    6.52    0.95
   8  -9   0    6.59    0.66
  -8  -9   0    6.48    0.80
  -8  -9   0    6.04    0.53
   8  -9   0    7.60    0.76
  -8   9   0    7.26    0.68
   8   9   0    6.02    0.70
   8   9   0    8.59    0.74
  -8   9   0    7.23    0.71
   8   9   0    5.57    0.68
   8   9   0    7.89    0.76
  -8   9   0    6.60    0.80
   8   9   0    7.23    0.72
  -9  -9   0   34.43    1.87
   9  -9   0   34.82    1.89
  -9  -9   0   32.60    2.01
   9  -9   0   32.81    1.91
  -9  -9   0   32.72    2.26
   9  -9   0   37.58    1.97
  -9   9   0   33.69    1.88
   9   9   0   32.72    1.94
   9   9   0   32.29    1.98
  -9   9   0   34.08    1.89
  -9   9   0   35.24    2.08
   9   9   0   32.63    1.96
   9   9   0   33.41    1.91
 -10  -9   0    5.97    0.67
 -10  -9   0    5.82    1.00
 -10  -9   0    5.90    0.94
  10  -9   0    6.97    0.83
  10  -9   0    5.27    0.70
  10  -9   0    4.54    0.71
  10   9   0    5.19    0.71
 -10   9   0    5.99    0.85
  10   9   0    5.53    0.79
  10   9   0    5.25    0.77
 -10   9   0    6.59    0.72
 -10   9   0    6.93    0.76
 -10   9   0    4.60    0.73
  11  -9   0    3.50    0.70
 -11  -9   0    3.06    0.98
  11  -9   0    2.05    0.63
 -11  -9   0    3.14    0.88
  11   9   0    2.34    0.72
 -11   9   0    3.56    0.64
 -11   9   0    2.37    0.74
  11   9   0    2.26    0.73
 -11   9   0    1.92    0.64
  11   9   0    2.90    0.63
 -12  -9   0    0.65    0.88
  12  -9   0    1.05    0.63
  12  -9   0    1.56    0.66
 -12  -9   0    0.41    0.94
 -12   9   0    0.43    0.65
 -12   9   0    1.53    0.61
  12   9   0    1.04    0.74
  12   9   0   -0.32    0.59
 -12   9   0    2.28    0.79
  12   9   0    0.31    0.69
  13  -9   0    1.19    0.74
 -13  -9   0    1.18    1.05
  13  -9   0    1.87    0.73
 -13  -9   0    1.81    0.96
  13   9   0    2.14    0.77
 -13   9   0    1.55    0.74
 -13   9   0    3.36    0.80
  13   9   0    0.75    0.84
 -14  -9   0    0.20    0.97
  14  -9   0   -0.39    0.73
  14  -9   0    1.28    0.80
 -14  -9   0    1.25    1.17
  14   9   0   -0.12    0.72
 -14   9   0   -0.07    0.77
  14   9   0   -0.27    0.81
 -15  -9   0    3.99    1.10
  15  -9   0    2.28    0.91
  15  -9   0    2.81    0.85
 -15  -9   0    1.67    1.21
 -15   9   0    2.77    0.88
  15   9   0    3.33    0.94
  15   9   0    1.39    1.00
 -16  -9   0   -0.07    1.03
  16  -9   0    0.93    0.93
  16  -9   0    0.45    0.86
 -16  -9   0    1.60    1.33
  16   9   0   -0.09    0.89
 -16   9   0   -0.24    0.87
  16   9   0    0.77    1.02
  17  -9   0    0.95    0.96
  17  -9   0    2.79    1.12
 -17  -9   0   -1.57    1.09
  17   9   0    1.71    1.03
  17   9   0   -0.34    1.12
 -17   9   0    1.08    0.98
  18  -9   0    0.83    1.14
 -18  -9   0    0.41    1.18
  18   9   0   -1.03    1.05
 -18   9   0   -0.82    0.99
  19  -9   0    5.90    1.38
 -19  -9   0    5.11    1.54
  19   9   0    3.66    1.16
  19   9   0    4.55    1.33
 -19   9   0    4.04    1.22
   0 -10   0    6.71    0.51
   0 -10   0    7.87    0.56
   0 -10   0    6.46    0.47
   0 -10   0    7.53    0.56
   0  10   0    6.50    0.52
   0  10   0    6.99    0.51
   0  10   0    6.44    0.53
   0  10   0    6.70    0.51
   0  10   0    6.82    0.52
   1 -10   0  112.28    5.32
   1 -10   0  113.01    5.30
  -1 -10   0  114.43    5.32
   1 -10   0  110.87    5.30
  -1 -10   0  113.71    5.27
   1 -10   0  112.32    5.28
  -1 -10   0  112.74    5.28
  -1 -10   0  109.56    5.32
   1  10   0  108.75    5.29
   1  10   0  105.92    5.29
   1  10   0  114.19    5.31
  -1  10   0  112.98    5.31
   1  10   0  110.51    5.32
   1  10   0  113.05    5.29
  -1  10   0  109.70    5.29
  -1  10   0  107.66    5.28
  -1  10   0  116.11    5.29
   2 -10   0   23.35    1.24
  -2 -10   0   21.96    1.18
   2 -10   0   23.72    1.25
   2 -10   0   23.16    1.23
   2 -10   0   23.80    1.21
  -2 -10   0   24.53    1.41
  -2 -10   0   22.22    1.26
  -2 -10   0   22.31    1.27
  -2 -10   0   23.22    1.21
   2  10   0   23.74    1.24
   2  10   0   23.24    1.31
   2  10   0   22.80    1.23
  -2  10   0   22.13    1.31
  -2  10   0   24.36    1.22
   2  10   0   23.45    1.25
   2  10   0   22.89    1.22
   2  10   0   22.93    1.25
  -2  10   0   23.61    1.24
  -2  10   0   22.97    1.22
  -3 -10   0   10.31    0.67
  -3 -10   0   11.32    0.89
   3 -10   0    9.65    0.69
  -3 -10   0    8.98    0.68
  -3 -10   0    9.91    0.72
   3 -10   0   10.02    0.70
  -3 -10   0    9.76    0.60
   3 -10   0    8.54    0.75
   3 -10   0   10.89    0.71
   3 -10   0   10.55    0.66
   3  10   0    9.15    0.67
   3  10   0   10.26    0.70
   3  10   0    9.29    0.69
  -3  10   0   11.25    0.66
  -3  10   0    9.96    0.71
  -3  10   0   10.19    0.79
   3  10   0   10.03    0.73
   3  10   0   10.71    0.71
   3  10   0    9.35    0.76
  -4 -10   0   11.43    0.70
   4 -10   0   12.44    0.81
   4 -10   0   11.26    0.80
  -4 -10   0   11.42    0.81
  -4 -10   0   10.93    0.83
   4 -10   0   12.39    0.76
   4 -10   0   12.34    0.82
  -4 -10   0   13.84    1.02
  -4 -10   0   11.78    0.81
  -4  10   0   12.58    0.93
   4  10   0   12.24    0.77
  -4  10   0   12.09    0.74
  -4  10   0   12.84    0.69
   4  10   0   12.94    0.80
   4  10   0   12.38    0.84
  -4  10   0   11.93    0.83
   4  10   0   10.21    0.77
   4  10   0   11.30    0.81
   4  10   0   12.75    0.87
   5 -10   0   40.13    2.03
  -5 -10   0   35.48    1.91
  -5 -10   0   39.42    2.03
  -5 -10   0   39.51    2.26
   5 -10   0   40.40    2.03
  -5 -10   0   34.79    2.04
  -5 -10   0   39.60    2.04
   5 -10   0   40.90    2.02
   5 -10   0   39.13    1.98
   5  10   0   39.38    1.99
  -5  10   0   38.43    1.94
   5  10   0   38.77    1.99
   5  10   0   37.96    2.01
   5  10   0   40.44    2.08
  -5  10   0   39.28    1.94
  -5  10   0   38.47    2.16
   5  10   0   39.51    2.04
   5  10   0   39.35    2.05
  -6 -10   0   -0.05    0.34
  -6 -10   0    0.01    0.23
   6 -10   0   -0.05    0.28
  -6 -10   0   -0.32    0.47
   6 -10   0    0.18    0.35
  -6 -10   0    0.65    0.35
  -6 -10   0   -0.55    0.40
   6 -10   0   -0.16    0.37
  -6  10   0   -0.04    0.28
  -6  10   0   -0.12    0.36
   6  10   0    0.13    0.31
   6  10   0   -0.46    0.38
   6  10   0    0.12    0.30
   6  10   0   -0.23    0.30
   6  10   0   -0.05    0.33
  -6  10   0   -0.25    0.29
   6  10   0    0.30    0.37
  -6  10   0   -0.02    0.47
  -6  10   0   -0.08    0.26
  -7 -10   0   62.36    3.24
  -7 -10   0   67.76    3.38
  -7 -10   0   69.99    3.71
   7 -10   0   67.46    3.36
  -7 -10   0   65.90    3.43
  -7 -10   0   63.12    3.43
   7 -10   0   69.52    3.40
   7 -10   0   70.42    3.40
  -7  10   0   68.18    3.33
   7  10   0   70.68    3.36
   7  10   0   65.36    3.39
   7  10   0   68.92    3.43
  -7  10   0   67.77    3.27
  -7  10   0   69.35    3.52
   7  10   0   64.62    3.42
  -7  10   0   66.03    3.38
   7  10   0   68.00    3.37
  -7  10   0   68.61    3.59
   7  10   0   71.35    3.44
  -8 -10   0   -0.10    0.55
   8 -10   0    0.41    0.39
   8 -10   0    0.04    0.45
  -8 -10   0    0.25    0.40
  -8 -10   0    0.09    0.48
  -8 -10   0    0.00    0.27
   8 -10   0    0.00    0.41
  -8 -10   0    0.21    0.56
  -8  10   0   -0.02    0.41
   8  10   0    0.29    0.43
  -8  10   0    0.67    0.43
   8  10   0    0.98    0.42
  -8  10   0    0.64    0.41
  -8  10   0    0.08    0.60
   8  10   0   -0.07    0.47
   8  10   0    0.71    0.46
  -9 -10   0   38.93    2.14
   9 -10   0   38.78    2.16
   9 -10   0   37.78    2.17
  -9 -10   0   37.27    2.28
  -9 -10   0   39.62    2.56
   9 -10   0   42.60    2.23
   9  10   0   40.51    2.30
   9  10   0   40.00    2.27
   9  10   0   38.86    2.21
   9  10   0   38.21    2.18
  -9  10   0   40.88    2.34
  -9  10   0   39.87    2.13
  -9  10   0   40.95    2.18
  10 -10   0   10.51    0.94
  10 -10   0   12.67    1.06
 -10 -10   0    9.79    0.99
 -10 -10   0   10.61    1.15
 -10 -10   0    9.55    1.24
  10 -10   0    9.32    0.93
  10  10   0   10.34    0.95
 -10  10   0    8.02    1.01
 -10  10   0   11.01    0.95
 -10  10   0    9.99    0.91
  10  10   0    9.26    1.02
  10  10   0   10.20    1.00
 -11 -10   0    2.47    0.92
 -11 -10   0    3.31    1.01
  11 -10   0    4.61    0.75
  11 -10   0    5.13    0.75
 -11  10   0    5.18    0.87
  11  10   0    4.11    0.86
  11  10   0    3.96    0.79
 -11  10   0    4.77    0.78
 -11  10   0    6.58    0.76
  11  10   0    5.81    0.82
  12 -10   0   23.35    1.64
 -12 -10   0   22.91    2.08
 -12 -10   0   23.61    1.84
  12 -10   0   22.71    1.61
  12  10   0   22.29    1.71
 -12  10   0   23.44    1.59
  12  10   0   24.10    1.83
 -12  10   0   25.16    1.57
  12  10   0   23.13    1.64
  13 -10   0    4.32    0.89
 -13 -10   0    5.40    1.13
 -13 -10   0    3.09    1.18
  13 -10   0    4.61    0.89
 -13  10   0    4.41    0.85
  13  10   0    2.23    0.91
 -13  10   0    4.64    0.84
  13  10   0    5.75    0.93
 -14 -10   0    5.19    1.17
 -14 -10   0    2.97    1.27
  14 -10   0    5.64    1.02
  14 -10   0    4.21    0.96
  14  10   0    4.50    0.99
 -14  10   0    5.92    0.97
  14  10   0    2.72    0.99
  15 -10   0    8.97    1.20
  15 -10   0    7.74    1.19
 -15 -10   0   10.18    1.72
 -15 -10   0    9.74    1.42
  15  10   0    8.46    1.20
  15  10   0    9.33    1.34
 -15  10   0   11.14    1.22
 -16 -10   0    3.51    1.25
 -16 -10   0    3.72    1.45
  16 -10   0    6.79    1.15
  16 -10   0    5.32    1.11
  16  10   0    3.26    1.20
  16  10   0    6.00    1.15
 -16  10   0    4.03    1.03
 -17 -10   0   -0.86    1.13
  17 -10   0    0.31    0.96
  17 -10   0   -0.05    0.99
 -17  10   0    0.87    0.94
  17  10   0   -1.68    1.05
  17  10   0   -0.54    0.97
  18 -10   0   -0.38    1.07
 -18 -10   0    0.83    1.27
 -18  10   0   -1.94    0.95
  18  10   0    0.72    1.16
  18  10   0   -0.83    0.88
  19 -10   0    1.05    1.16
 -19 -10   0   -1.65    1.25
  19  10   0    1.00    1.20
 -19  10   0    1.64    1.08
  19  10   0    0.23    1.17
   0 -11   0    0.27    0.21
   0 -11   0    0.52    0.28
   0 -11   0    0.64    0.27
   0 -11   0    0.19    0.26
   0  11   0    0.51    0.24
   0  11   0    0.61    0.26
   0  11   0    0.21    0.24
   0  11   0   -0.01    0.24
   0  11   0    0.14    0.25
  -1 -11   0    0.38    0.22
  -1 -11   0    0.23    0.29
   1 -11   0    0.02    0.27
   1 -11   0    0.51    0.28
   1 -11   0    0.09    0.22
  -1 -11   0    0.63    0.29
  -1 -11   0    0.65    0.26
   1 -11   0    0.19    0.27
  -1  11   0    0.54    0.32
  -1  11   0    0.22    0.25
   1  11   0    0.77    0.27
   1  11   0    0.08    0.24
  -1  11   0    0.39    0.25
   1  11   0    0.58    0.27
  -1  11   0    0.07    0.27
  -1  11   0    0.20    0.24
   1  11   0    0.09    0.27
   1  11   0    0.57    0.26
  -2 -11   0    0.17    0.21
  -2 -11   0    0.52    0.23
  -2 -11   0    0.02    0.36
  -2 -11   0    0.13    0.17
  -2 -11   0    0.13    0.29
   2 -11   0    0.46    0.28
   2 -11   0    0.29    0.28
   2 -11   0    0.02    0.28
   2 -11   0    0.10    0.21
  -2 -11   0   -0.02    0.28
   2  11   0    0.26    0.26
  -2  11   0    0.22    0.27
   2  11   0    0.03    0.25
  -2  11   0    0.37    0.30
   2  11   0   -0.08    0.26
   2  11   0    0.29    0.26
  -2  11   0    0.03    0.25
  -2  11   0    0.02    0.24
   2  11   0   -0.25    0.28
   2  11   0    0.24    0.26
  -3 -11   0   94.22    4.42
   3 -11   0   91.10    4.22
  -3 -11   0   87.64    4.24
   3 -11   0   74.56    4.40
  -3 -11   0   83.73    4.18
  -3 -11   0   90.63    4.19
   3 -11   0   86.19    4.19
   3 -11   0   86.46    4.20
  -3 -11   0   85.24    4.14
   3 -11   0   88.90    4.18
  -3  11   0   88.56    4.17
   3  11   0   89.80    4.29
   3  11   0   83.61    4.19
   3  11   0   85.43    4.24
   3  11   0   85.99    4.22
  -3  11   0   86.38    4.30
  -3  11   0   89.30    4.21
   3  11   0   89.41    4.22
   4 -11   0    6.86    0.60
  -4 -11   0    6.72    0.78
  -4 -11   0    7.34    0.58
   4 -11   0    6.19    0.58
  -4 -11   0    5.36    0.47
   4 -11   0    5.86    0.61
   4 -11   0    5.75    0.57
  -4 -11   0    6.25    0.58
   4 -11   0    6.00    0.53
  -4 -11   0    6.65    0.61
   4  11   0    6.94    0.67
   4  11   0    5.48    0.53
  -4  11   0    6.25    0.60
   4  11   0    7.15    0.63
  -4  11   0    5.68    0.51
   4  11   0    6.69    0.57
   4  11   0    5.78    0.59
   4  11   0    5.73    0.54
  -4  11   0    6.59    0.71
  -5 -11   0   45.78    2.31
   5 -11   0   47.53    2.39
  -5 -11   0   43.56    2.43
  -5 -11   0   45.12    2.65
  -5 -11   0   47.92    2.44
  -5 -11   0   47.58    2.42
   5 -11   0   47.02    2.42
   5 -11   0   47.85    2.42
   5 -11   0   50.26    2.42
   5  11   0   47.60    2.39
   5  11   0   47.67    2.48
   5  11   0   46.87    2.45
  -5  11   0   50.66    2.45
  -5  11   0   50.33    2.51
   5  11   0   47.34    2.44
   5  11   0   46.57    2.42
  -5  11   0   48.80    2.33
  -5  11   0   45.76    2.56
   5  11   0   45.91    2.39
  -5  11   0   47.25    2.35
  -6 -11   0   63.70    3.13
  -6 -11   0   60.77    3.11
   6 -11   0   62.88    3.11
  -6 -11   0   60.15    3.14
   6 -11   0   62.85    3.08
  -6 -11   0   57.77    2.98
  -6 -11   0   59.05    3.37
   6 -11   0   61.97    3.10
   6  11   0   60.11    3.13
  -6  11   0   61.32    3.01
  -6  11   0   65.47    3.03
   6  11   0   65.95    3.15
   6  11   0   62.07    3.16
   6  11   0   62.98    3.08
  -6  11   0   61.96    3.28
  -6  11   0   58.71    3.10
   6  11   0   62.44    3.11
   6  11   0   59.57    3.07
  -6  11   0   63.93    3.21
  -7 -11   0    8.84    0.82
   7 -11   0    7.93    0.70
   7 -11   0    8.92    0.77
  -7 -11   0    7.39    0.89
  -7 -11   0    9.34    0.77
  -7 -11   0    8.08    1.02
   7 -11   0    8.14    0.76
  -7 -11   0    6.94    0.58
  -7  11   0    8.68    0.64
  -7  11   0    6.87    0.73
   7  11   0    8.46    0.71
  -7  11   0    7.19    0.69
   7  11   0    7.50    0.72
   7  11   0    7.36    0.73
  -7  11   0    8.60    1.00
   7  11   0    9.12    0.82
  -7  11   0    6.87    0.78
   7  11   0    7.45    0.76
   7  11   0   10.13    0.88
  -8 -11   0    5.28    0.91
  -8 -11   0    7.04    0.77
   8 -11   0    5.95    0.66
  -8 -11   0    4.46    0.81
   8 -11   0    6.08    0.71
   8 -11   0    5.96    0.69
  -8 -11   0    5.54    0.64
   8  11   0    4.81    0.68
  -8  11   0    6.25    0.93
   8  11   0    5.48    0.63
   8  11   0    6.03    0.75
  -8  11   0    5.92    0.65
   8  11   0    5.56    0.67
  -8  11   0    5.27    0.74
  -8  11   0    5.56    0.52
   8  11   0    6.05    0.72
  -8  11   0    6.17    0.70
   9 -11   0   18.01    1.25
  -9 -11   0   16.58    1.15
  -9 -11   0   16.22    1.54
  -9 -11   0   14.92    1.33
   9 -11   0   14.91    1.14
   9 -11   0   15.68    1.18
  -9  11   0   16.95    1.11
   9  11   0   17.39    1.20
  -9  11   0   16.04    1.29
   9  11   0   14.85    1.24
  -9  11   0   17.56    1.18
   9  11   0   13.99    1.13
   9  11   0   15.27    1.22
   9  11   0   16.32    1.23
 -10 -11   0    9.15    1.31
  10 -11   0   11.86    1.03
 -10 -11   0   10.56    1.18
  10 -11   0    9.00    0.94
  10 -11   0   10.01    0.98
  10  11   0    9.23    0.96
  10  11   0    9.33    1.05
  10  11   0    9.86    1.00
 -10  11   0    9.35    0.91
 -10  11   0    9.79    1.06
 -10  11   0   11.53    0.97
  11 -11   0    1.15    0.61
 -11 -11   0    0.72    0.83
  11 -11   0    1.34    0.60
 -11 -11   0    0.02    0.87
  11  11   0    0.78    0.59
  11  11   0    1.31    0.67
 -11  11   0    1.61    0.62
  11  11   0   -0.09    0.66
 -11  11   0    0.99    0.59
 -12 -11   0    0.27    0.89
 -12 -11   0    0.75    0.95
  12 -11   0   -0.08    0.63
  12 -11   0    0.92    0.64
  12  11   0    0.45    0.65
  12  11   0   -0.97    0.70
 -12  11   0    0.35    0.63
  12  11   0    0.37    0.75
 -12  11   0    0.61    0.65
 -13 -11   0    5.40    1.13
  13 -11   0    4.54    0.89
 -13 -11   0    2.73    1.19
  13 -11   0    3.62    0.88
  13  11   0    6.21    0.97
  13  11   0    2.66    0.91
 -13  11   0    6.31    0.91
 -13  11   0    5.74    0.89
  14 -11   0    0.90    0.82
  14 -11   0    0.66    0.75
 -14 -11   0   -0.23    1.11
 -14 -11   0    1.11    1.04
 -14  11   0    1.62    0.78
  14  11   0    0.96    0.84
  14  11   0   -0.41    0.87
 -15 -11   0   -0.04    1.21
  15 -11   0    0.17    0.84
  15 -11   0    2.08    0.89
 -15 -11   0    1.30    1.09
 -15  11   0    1.45    0.88
  15  11   0    0.79    0.94
  15  11   0    1.74    0.92
  16 -11   0    1.24    0.98
  16 -11   0    1.93    0.97
 -16 -11   0    1.53    1.41
 -16 -11   0    1.45    1.19
  16  11   0    2.17    0.92
 -16  11   0    0.59    0.87
  16  11   0    0.08    1.01
  16  11   0    2.62    0.99
 -17 -11   0    2.43    1.34
  17 -11   0    3.51    1.19
  17 -11   0    3.53    1.17
 -17  11   0    3.18    1.09
  17  11   0    4.78    1.21
  17  11   0    3.11    1.34
  17  11   0    4.39    1.09
 -18 -11   0   -0.81    1.24
  18 -11   0   -1.10    1.10
  18  11   0   -1.47    1.02
  18  11   0   -0.39    0.97
 -18  11   0   -0.19    0.97
  19 -11   0    6.28    1.42
  19  11   0    2.88    1.30
   0 -12   0   10.65    0.77
   0 -12   0   10.97    0.70
   0 -12   0   11.32    0.73
   0 -12   0   11.47    0.78
   0  12   0   10.04    0.75
   0  12   0   10.78    0.73
   0  12   0   11.64    0.72
   0  12   0   11.32    0.73
   0  12   0   10.86    0.72
  -1 -12   0   19.55    1.07
   1 -12   0   20.30    1.07
  -1 -12   0   19.42    1.14
  -1 -12   0   21.19    1.28
  -1 -12   0   19.09    1.12
  -1 -12   0   18.91    1.05
   1 -12   0   18.11    1.12
   1 -12   0   19.98    1.11
   1 -12   0   20.97    1.11
  -1  12   0   20.13    1.13
  -1  12   0   19.64    1.10
   1  12   0   21.78    1.10
  -1  12   0   18.40    1.07
   1  12   0   19.05    1.09
   1  12   0   18.89    1.10
  -1  12   0   18.66    1.09
   1  12   0   19.01    1.11
  -1  12   0   20.27    1.09
   1  12   0   17.16    1.08
   2 -12   0    1.74    0.36
   2 -12   0    1.64    0.29
  -2 -12   0    2.02    0.30
  -2 -12   0    2.04    0.39
  -2 -12   0    1.58    0.29
  -2 -12   0    1.21    0.45
   2 -12   0    2.18    0.35
  -2 -12   0    2.09    0.41
   2 -12   0    2.07    0.35
  -2 -12   0    0.56    0.23
  -2  12   0    1.56    0.32
   2  12   0    1.97    0.35
   2  12   0    1.58    0.34
   2  12   0    1.62    0.37
  -2  12   0    1.43    0.39
  -2  12   0    1.79    0.35
   2  12   0    1.58    0.42
   2  12   0    1.74    0.34
  -2  12   0    2.35    0.35
   3 -12   0    0.52    0.33
  -3 -12   0    1.12    0.26
  -3 -12   0    0.66    0.28
   3 -12   0    0.44    0.31
  -3 -12   0    0.30    0.41
  -3 -12   0    0.38    0.29
   3 -12   0    1.15    0.35
  -3 -12   0    0.58    0.34
   3 -12   0    0.66    0.27
   3  12   0    1.03    0.40
  -3  12   0    0.46    0.28
  -3  12   0    0.77    0.33
   3  12   0    0.78    0.34
   3  12   0    0.29    0.36
   3  12   0    1.00    0.32
  -3  12   0    0.44    0.36
   3  12   0    0.11    0.29
  -3  12   0    0.33    0.29
   3  12   0    0.65    0.31
  -4 -12   0   13.76    0.88
   4 -12   0   14.37    0.90
  -4 -12   0   12.94    0.80
  -4 -12   0   13.93    1.14
   4 -12   0   14.02    0.92
   4 -12   0   12.85    0.95
   4 -12   0   14.47    0.93
  -4 -12   0   13.43    0.95
  -4 -12   0   12.08    0.88
   4 -12   0   14.26    0.87
   4  12   0   13.69    0.93
   4  12   0   13.68    0.89
   4  12   0   14.60    0.95
   4  12   0   13.24    0.90
  -4  12   0   14.46    0.94
   4  12   0   14.36    0.99
  -4  12   0   13.12    0.84
   4  12   0   13.58    0.90
  -4  12   0   14.47    1.03
  -5 -12   0    4.70    0.56
   5 -12   0    4.17    0.54
  -5 -12   0    5.02    0.76
  -5 -12   0    4.18    0.41
   5 -12   0    5.64    0.56
   5 -12   0    4.90    0.61
  -5 -12   0    4.20    0.56
  -5 -12   0    3.60    0.58
   5 -12   0    3.74    0.46
   5  12   0    2.93    0.52
   5  12   0    4.04    0.55
   5  12   0    3.32    0.47
   5  12   0    4.77    0.53
  -5  12   0    4.08    0.54
  -5  12   0    4.30    0.46
  -5  12   0    4.57    0.68
  -5  12   0    3.76    0.54
   5  12   0    4.25    0.52
   5  12   0    4.46    0.62
  -6 -12   0   63.00    3.13
  -6 -12   0   56.26    3.13
  -6 -12   0   62.38    3.13
   6 -12   0   60.81    3.07
  -6 -12   0   57.18    3.38
   6 -12   0   62.16    3.11
  -6 -12   0   56.88    2.97
   6 -12   0   62.72    3.10
  -6  12   0   62.78    3.01
   6  12   0   60.25    3.15
  -6  12   0   64.90    3.31
  -6  12   0   61.74    3.01
   6  12   0   62.88    3.18
   6  12   0   63.61    3.09
  -6  12   0   63.62    3.13
   6  12   0   62.59    3.11
   6  12   0   60.09    3.14
   6  12   0   63.99    3.09
  -7 -12   0   74.19    3.76
  -7 -12   0   78.65    3.95
  -7 -12   0   77.33    4.26
  -7 -12   0   75.62    3.95
   7 -12   0   77.18    3.91
   7 -12   0   78.18    3.89
  -7 -12   0   81.23    3.93
   7 -12   0   80.06    3.92
   7  12   0   78.32    3.90
   7  12   0   81.25    3.90
   7  12   0   76.91    3.92
  -7  12   0   80.50    3.81
   7  12   0   79.17    3.99
  -7  12   0   79.31    3.92
   7  12   0   75.97    3.96
  -7  12   0   79.11    4.13
  -7  12   0   79.82    4.03
   7  12   0   80.34    3.96
  -7  12   0   79.62    3.83
  -8 -12   0   74.63    3.71
  -8 -12   0   72.14    4.10
  -8 -12   0   69.96    3.78
   8 -12   0   78.50    3.74
   8 -12   0   74.27    3.71
   8 -12   0   74.31    3.73
  -8 -12   0   73.67    3.78
   8  12   0   76.07    3.94
  -8  12   0   76.58    3.65
  -8  12   0   72.83    3.58
  -8  12   0   73.09    3.72
  -8  12   0   72.98    3.85
   8  12   0   72.09    3.79
   8  12   0   69.95    3.71
   8  12   0   74.11    3.69
   8  12   0   74.04    3.73
  -8  12   0   75.37    3.98
   8  12   0   72.49    3.78
  -9 -12   0   13.63    0.99
   9 -12   0   11.60    1.01
   9 -12   0    9.43    0.92
  -9 -12   0   10.23    1.26
  -9 -12   0   10.08    1.13
   9 -12   0   12.12    1.01
  -9  12   0    9.75    1.03
   9  12   0    9.81    0.91
   9  12   0   10.75    1.06
  -9  12   0   11.06    0.96
  -9  12   0   10.92    1.29
   9  12   0   11.88    1.07
  -9  12   0    9.81    0.90
   9  12   0   10.25    0.96
  10 -12   0    1.17    0.59
 -10 -12   0    2.62    0.93
 -10 -12   0    0.97    0.80
  10 -12   0    3.06    0.71
  10 -12   0    2.11    0.61
 -10  12   0    0.90    0.56
  10  12   0    1.89    0.63
  10  12   0    0.08    0.63
 -10  12   0    2.36    0.63
  10  12   0    1.78    0.70
  10  12   0    2.29    0.58
  10  12   0    2.33    0.65
 -11 -12   0    1.84    0.95
 -11 -12   0    0.06    0.81
  11 -12   0    1.02    0.60
  11 -12   0    1.00    0.61
  11  12   0    0.65    0.64
 -11  12   0    1.06    0.59
 -11  12   0    0.90    0.62
  11  12   0    0.85    0.69
  11  12   0    1.45    0.72
  11  12   0    0.21    0.55
 -12 -12   0    5.67    1.12
  12 -12   0    4.49    0.86
 -12 -12   0    3.04    1.11
  12 -12   0    3.50    0.84
 -12  12   0    4.25    0.82
  12  12   0    5.62    0.95
 -12  12   0    6.02    0.85
  12  12   0    4.37    0.85
  12  12   0    4.80    0.79
  13 -12   0    1.10    0.75
 -13 -12   0   -0.03    0.95
  13 -12   0    1.94    0.77
 -13 -12   0    0.94    1.08
 -13  12   0    2.22    0.76
  13  12   0    2.17    0.81
 -13  12   0   -0.20    0.69
  13  12   0    1.48    0.70
  13  12   0    0.87    0.87
  14 -12   0    0.09    0.74
  14 -12   0   -0.77    0.78
 -14 -12   0   -0.90    1.10
 -14 -12   0   -0.80    0.99
  14  12   0    0.16    0.80
  14  12   0    0.24    0.75
 -14  12   0    0.94    0.79
  14  12   0    0.26    0.95
  15 -12   0    0.99    0.89
 -15 -12   0    0.90    1.24
  15 -12   0    1.59    0.87
 -15 -12   0    2.78    1.21
  15  12   0   -0.64    0.84
 -15  12   0   -0.88    0.80
  15  12   0    1.20    0.83
  15  12   0   -0.07    0.91
  16 -12   0    2.43    1.03
 -16 -12   0    2.54    1.26
 -16 -12   0    4.10    1.69
  16 -12   0    2.89    1.05
  16  12   0    4.28    1.26
  16  12   0    1.59    1.04
  16  12   0    3.49    1.01
 -16  12   0    1.96    0.97
  17 -12   0    3.72    1.17
 -17 -12   0    1.57    1.31
  17  12   0    4.10    1.31
  17  12   0    2.01    1.08
 -17  12   0    4.46    1.10
  17  12   0    3.10    1.08
  18 -12   0    0.83    1.15
 -18 -12   0   -0.39    1.32
  18  12   0    0.50    1.10
 -18  12   0   -0.67    0.96
  18  12   0   -0.28    1.01
   0 -13   0    0.49    0.33
   0 -13   0    0.33    0.32
   0 -13   0    0.28    0.30
   0 -13   0   -0.33    0.24
   0  13   0    0.24    0.28
   0  13   0    0.32    0.29
   0  13   0    0.01    0.29
   0  13   0   -0.33    0.27
   0  13   0    0.14    0.29
   1 -13   0   42.77    2.12
   1 -13   0   42.77    2.11
   1 -13   0   42.78    2.14
   1 -13   0   42.50    2.08
  -1 -13   0   41.04    2.13
  -1 -13   0   40.74    2.07
  -1 -13   0   41.01    2.27
  -1 -13   0   40.37    2.08
  -1 -13   0   43.58    2.16
   1  13   0   37.94    2.11
  -1  13   0   40.71    2.10
   1  13   0   39.59    2.13
  -1  13   0   42.08    2.09
   1  13   0   41.23    2.10
   1  13   0   41.38    2.11
  -1  13   0   40.20    2.13
  -1  13   0   43.45    2.12
  -1  13   0   42.39    2.10
   1  13   0   42.99    2.10
  -2 -13   0   40.20    2.07
  -2 -13   0   40.99    2.13
  -2 -13   0   40.74    2.05
   2 -13   0   41.87    2.07
   2 -13   0   41.57    2.10
  -2 -13   0   42.09    2.30
   2 -13   0   42.03    2.11
   2 -13   0   41.52    2.13
  -2 -13   0   41.65    2.15
   2  13   0   39.83    2.21
  -2  13   0   42.49    2.21
   2  13   0   43.72    2.12
   2  13   0   38.36    2.09
   2  13   0   40.73    2.13
  -2  13   0   41.40    2.08
   2  13   0   41.18    2.09
  -2  13   0   42.06    2.08
  -2  13   0   40.11    2.10
   3 -13   0    0.50    0.35
  -3 -13   0    0.38    0.30
   3 -13   0    0.02    0.32
   3 -13   0    0.08    0.27
  -3 -13   0    0.13    0.44
  -3 -13   0    0.57    0.27
   3 -13   0    0.81    0.35
  -3 -13   0   -0.19    0.29
  -3 -13   0    0.01    0.36
  -3  13   0    0.72    0.33
   3  13   0    0.40    0.40
   3  13   0    0.38    0.32
  -3  13   0   -0.01    0.35
  -3  13   0    0.16    0.29
  -3  13   0    0.29    0.29
   3  13   0    0.43    0.31
   3  13   0   -0.06    0.34
   3  13   0    0.51    0.32
   4 -13   0    1.55    0.39
   4 -13   0    1.49    0.40
  -4 -13   0    1.55    0.38
  -4 -13   0    1.83    0.58
  -4 -13   0    0.95    0.39
  -4 -13   0    1.39    0.43
   4 -13   0    1.61    0.42
   4 -13   0    1.51    0.45
   4 -13   0    1.20    0.36
  -4 -13   0    1.47    0.31
  -4  13   0    1.86    0.41
   4  13   0    1.42    0.38
   4  13   0    1.64    0.39
   4  13   0    1.42    0.49
   4  13   0    1.61    0.40
  -4  13   0    1.45    0.35
  -4  13   0    1.75    0.49
   4  13   0    1.85    0.43
   4  13   0    1.35    0.41
  -5 -13   0   10.13    0.84
   5 -13   0   10.89    0.85
  -5 -13   0   10.41    0.89
  -5 -13   0   11.02    0.85
  -5 -13   0    9.59    0.70
   5 -13   0   10.71    0.78
   5 -13   0   10.42    0.85
  -5 -13   0   10.67    1.08
   5 -13   0   11.62    0.92
   5  13   0   11.57    0.86
  -5  13   0   11.11    0.89
   5  13   0   11.59    0.84
   5  13   0   11.19    0.85
   5  13   0   10.86    0.94
   5  13   0   10.21    0.88
  -5  13   0   11.67    0.90
  -5  13   0   10.93    1.03
  -5  13   0   10.61    0.76
   5  13   0    9.56    0.88
  -6 -13   0    3.83    0.56
   6 -13   0    3.18    0.52
  -6 -13   0    3.38    0.56
   6 -13   0    3.40    0.51
  -6 -13   0    3.36    0.74
  -6 -13   0    3.33    0.39
  -6 -13   0    1.56    0.59
   6 -13   0    3.42    0.55
   6  13   0    3.18    0.52
  -6  13   0    2.57    0.51
   6  13   0    2.43    0.47
   6  13   0    2.78    0.48
   6  13   0    2.48    0.57
   6  13   0    3.21    0.63
   6  13   0    4.27    0.60
  -6  13   0    2.77    0.42
  -6  13   0    2.62    0.39
  -6  13   0    2.97    0.66
  -6  13   0    2.98    0.51
  -7 -13   0    7.36    0.76
   7 -13   0    5.19    0.66
  -7 -13   0    5.10    0.50
   7 -13   0    6.28    0.67
   7 -13   0    5.52    0.68
  -7 -13   0    6.06    0.69
  -7 -13   0    5.66    0.96
  -7 -13   0    5.95    0.76
   7  13   0    5.22    0.71
  -7  13   0    6.13    0.88
  -7  13   0    6.00    0.69
  -7  13   0    6.61    0.59
   7  13   0    6.17    0.74
   7  13   0    6.02    0.78
   7  13   0    6.05    0.68
  -7  13   0    5.72    0.56
  -7  13   0    4.68    0.67
   7  13   0    6.05    0.67
   7  13   0    5.71    0.64
   8 -13   0    1.38    0.50
   8 -13   0    0.74    0.47
  -8 -13   0    1.78    0.76
  -8 -13   0    2.22    0.53
  -8 -13   0    0.48    0.61
   8 -13   0    1.23    0.54
  -8 -13   0    0.68    0.59
   8  13   0    1.21    0.56
   8  13   0    1.72    0.50
  -8  13   0    1.44    0.53
   8  13   0    1.41    0.51
   8  13   0    2.23    0.60
  -8  13   0    1.19    0.52
  -8  13   0    1.19    0.40
  -8  13   0    1.48    0.71
  -8  13   0    1.35    0.42
   9 -13   0   35.48    2.01
  -9 -13   0   34.83    2.00
   9 -13   0   36.14    2.01
  -9 -13   0   30.60    2.35
  -9 -13   0   31.21    2.07
   9 -13   0   37.14    2.03
  -9  13   0   36.41    2.01
  -9  13   0   36.02    1.90
   9  13   0   32.75    2.06
  -9  13   0   35.24    2.33
   9  13   0   35.52    2.02
   9  13   0   35.04    2.12
   9  13   0   31.65    1.97
 -10 -13   0   12.68    1.57
  10 -13   0   16.20    1.23
 -10 -13   0   13.78    1.40
  10 -13   0   14.47    1.22
  10 -13   0   17.80    1.31
  10  13   0   15.28    1.36
  10  13   0   13.87    1.26
  10  13   0   16.94    1.44
 -10  13   0   15.95    1.14
  10  13   0   17.55    1.29
 -10  13   0   14.70    1.23
  10  13   0   13.87    1.19
 -11 -13   0   11.59    1.58
  11 -13   0   14.16    1.20
 -11 -13   0   14.05    1.41
  11 -13   0   14.38    1.23
  11  13   0   12.66    1.20
 -11  13   0   15.46    1.23
  11  13   0   12.76    1.13
  11  13   0   11.78    1.27
 -11  13   0   13.64    1.14
  11  13   0   12.26    1.24
  12 -13   0   12.91    1.28
 -12 -13   0   13.99    1.50
  12 -13   0   13.82    1.28
 -12 -13   0   13.71    1.70
  12  13   0   13.52    1.35
  12  13   0   14.75    1.32
 -12  13   0   18.15    1.28
  12  13   0   13.43    1.26
 -12  13   0   16.02    1.33
  13 -13   0    1.92    0.78
 -13 -13   0    0.61    1.03
  13 -13   0    0.88    0.74
 -13 -13   0    1.88    1.20
  13  13   0   -0.06    0.72
  13  13   0    1.11    0.82
  13  13   0    1.93    0.81
 -13  13   0    1.44    0.75
 -13  13   0    1.57    0.80
  14 -13   0    6.59    1.09
  14 -13   0    4.70    1.05
 -14 -13   0    5.86    1.47
 -14 -13   0    6.29    1.28
  14  13   0    4.13    1.12
  14  13   0    6.78    1.11
  14  13   0    6.29    0.99
 -14  13   0    5.34    0.97
  15 -13   0    5.06    1.06
 -15 -13   0    7.18    1.67
  15 -13   0    4.96    1.05
 -15 -13   0    3.99    1.28
 -15  13   0    4.73    1.03
  15  13   0    4.43    0.99
  15  13   0    5.07    1.14
  15  13   0    5.61    1.28
 -16 -13   0    3.21    1.35
  16 -13   0    4.91    1.16
  16 -13   0    3.67    1.10
  16  13   0    4.00    1.12
  16  13   0    4.69    1.05
 -16  13   0    5.41    1.08
  16  13   0    3.55    1.27
 -17 -13   0    5.00    1.46
  17 -13   0    5.76    1.24
  17  13   0    6.71    1.32
  17  13   0    3.34    1.06
 -17  13   0    5.91    1.16
 -18 -13   0   -0.42    1.41
  18 -13   0    3.21    1.28
  18  13   0    4.44    1.29
 -18  13   0    1.84    1.05
  18  13   0    0.83    1.06
   0 -14   0    2.35    0.36
   0 -14   0    2.35    0.58
   0 -14   0    2.23    0.39
   0 -14   0    2.05    0.42
   0 -14   0    2.07    0.43
   0  14   0    2.38    0.40
   0  14   0    1.61    0.41
   0  14   0    2.05    0.36
   0  14   0    2.20    0.39
   0  14   0    2.15    0.39
   1 -14   0  117.34    5.56
   1 -14   0  116.23    5.55
  -1 -14   0  116.32    5.53
  -1 -14   0  117.40    5.60
  -1 -14   0  114.25    5.57
   1 -14   0  116.49    5.53
  -1 -14   0  124.60    5.76
  -1 -14   0  117.33    5.52
   1 -14   0  113.68    5.58
   1  14   0  114.23    5.54
  -1  14   0  114.97    5.54
  -1  14   0  113.96    5.55
  -1  14   0  111.70    5.56
   1  14   0  114.96    5.56
   1  14   0  115.42    5.55
  -1  14   0  118.86    5.54
   1  14   0  114.53    5.58
  -2 -14   0   61.58    2.99
  -2 -14   0   60.26    3.06
   2 -14   0   61.56    3.04
   2 -14   0   62.38    3.01
  -2 -14   0   61.95    3.25
   2 -14   0   64.04    3.07
  -2 -14   0   57.38    3.01
   2 -14   0   60.83    3.04
  -2 -14   0   58.27    3.07
  -2  14   0   62.95    3.15
  -2  14   0   61.07    3.02
   2  14   0   62.53    3.08
  -2  14   0   62.54    3.04
   2  14   0   62.65    3.03
   2  14   0   61.71    3.15
   2  14   0   62.24    3.05
  -2  14   0   61.48    3.02
   2  14   0   58.44    3.03
  -3 -14   0  161.98    8.18
   3 -14   0  174.16    8.26
   3 -14   0  176.70    8.25
  -3 -14   0  171.23    8.18
   3 -14   0  179.25    8.24
  -3 -14   0  172.69    8.22
  -3 -14   0  176.12    8.29
   3 -14   0  177.46    8.23
  -3 -14   0  175.11    8.49
   3  14   0  170.27    8.23
   3  14   0  173.64    8.26
  -3  14   0  174.94    8.22
   3  14   0  177.04    8.29
   3  14   0  176.81    8.36
  -3  14   0  173.39    8.21
  -3  14   0  173.66    8.25
  -3  14   0  166.26    8.35
   3  14   0  175.81    8.23
  -4 -14   0   31.01    1.60
   4 -14   0   32.49    1.67
  -4 -14   0   32.56    1.75
   4 -14   0   30.96    1.68
  -4 -14   0   29.45    1.65
  -4 -14   0   32.42    1.99
   4 -14   0   30.69    1.72
  -4 -14   0   31.04    1.67
   4 -14   0   31.23    1.72
   4 -14   0   30.48    1.76
   4  14   0   32.98    1.71
  -4  14   0   30.54    1.83
  -4  14   0   30.61    1.64
  -4  14   0   30.64    1.71
   4  14   0   30.31    1.73
   4  14   0   30.50    1.73
   4  14   0   29.14    1.67
   4  14   0   32.43    1.83
   4  14   0   30.80    1.70
  -5 -14   0    5.88    0.63
  -5 -14   0    3.72    0.76
  -5 -14   0    5.60    0.59
   5 -14   0    4.77    0.65
   5 -14   0    5.02    0.59
  -5 -14   0    4.99    0.61
   5 -14   0    5.50    0.56
  -5 -14   0    4.50    0.46
   5 -14   0    4.99    0.59
  -5  14   0    4.45    0.73
   5  14   0    3.78    0.61
  -5  14   0    5.03    0.67
   5  14   0    4.16    0.56
  -5  14   0    4.86    0.61
  -5  14   0    4.29    0.49
   5  14   0    4.54    0.62
   5  14   0    5.57    0.72
   5  14   0    4.83    0.60
   5  14   0    5.51    0.61
  -6 -14   0    0.97    0.34
  -6 -14   0    1.51    0.53
   6 -14   0    1.96    0.68
  -6 -14   0    1.74    0.50
   6 -14   0    1.62    0.44
  -6 -14   0    0.44    0.54
  -6 -14   0    0.95    0.64
   6 -14   0    2.57    0.52
   6 -14   0    2.47    0.51
   6  14   0    1.47    0.48
   6  14   0    1.66    0.47
  -6  14   0    1.45    0.40
   6  14   0    0.86    0.51
   6  14   0    2.20    0.55
  -6  14   0    1.70    0.52
   6  14   0    1.48    0.46
   6  14   0    1.84    0.57
  -6  14   0    1.82    0.62
  -7 -14   0   42.48    2.48
   7 -14   0   48.90    2.47
   7 -14   0   47.48    2.45
  -7 -14   0   48.81    2.51
  -7 -14   0   51.95    2.51
   7 -14   0   48.00    2.48
  -7 -14   0   42.38    2.29
  -7 -14   0   44.73    2.82
  -7  14   0   46.36    2.32
   7  14   0   45.64    2.56
   7  14   0   45.02    2.43
  -7  14   0   47.19    2.48
   7  14   0   46.65    2.47
   7  14   0   46.69    2.47
  -7  14   0   46.30    2.88
  -7  14   0   44.96    2.34
   7  14   0   44.93    2.53
  -7  14   0   45.25    2.71
  -8 -14   0    5.79    0.88
  -8 -14   0    6.82    0.84
   8 -14   0    5.15    0.71
  -8 -14   0    6.53    0.77
  -8 -14   0    5.66    0.54
   8 -14   0    5.71    0.76
  -8 -14   0    5.10    1.04
   8 -14   0    7.38    0.80
   8  14   0    5.84    0.71
   8  14   0    7.06    0.77
   8  14   0    7.54    0.87
  -8  14   0    7.05    0.63
  -8  14   0    6.98    0.78
  -8  14   0    5.51    0.98
   8  14   0    7.48    0.91
  -8  14   0    6.94    0.64
   9 -14   0    1.01    0.60
   9 -14   0    1.67    0.59
  -9 -14   0    1.99    0.87
  -9 -14   0    1.02    0.62
  -9 -14   0    1.24    0.71
   9 -14   0    0.52    0.54
   9  14   0    1.89    0.59
  -9  14   0    1.67    0.49
   9  14   0    1.47    0.55
  -9  14   0    0.57    0.55
  -9  14   0    0.73    0.80
   9  14   0    1.49    0.68
   9  14   0    1.07    0.69
  10 -14   0    0.04    0.61
  10 -14   0    0.06    0.56
  10 -14   0   -0.35    0.55
 -10 -14   0    1.75    0.93
 -10 -14   0    1.12    0.79
  10  14   0    1.11    0.63
 -10  14   0    1.60    0.96
  10  14   0    0.45    0.66
  10  14   0    0.15    0.69
 -10  14   0    0.87    0.51
 -10  14   0    0.53    0.60
  10  14   0    0.66    0.57
 -11 -14   0    8.79    1.18
  11 -14   0    7.91    0.96
 -11 -14   0    8.88    1.45
  11 -14   0    6.60    0.95
  11  14   0    8.26    0.98
 -11  14   0    8.60    0.91
  11  14   0    6.37    0.89
 -11  14   0    9.46    1.00
  11  14   0    7.93    1.05
 -12 -14   0   10.23    1.58
  12 -14   0    9.70    1.10
 -12 -14   0    9.92    1.32
  12 -14   0    8.77    1.07
  12  14   0    7.99    1.02
  12  14   0    8.04    1.12
 -12  14   0   10.20    1.00
 -12  14   0   10.63    1.09
  12  14   0    9.30    1.13
 -13 -14   0   12.11    1.44
 -13 -14   0    9.24    1.58
  13 -14   0   10.15    1.20
  13 -14   0    9.18    1.13
  13  14   0    8.92    1.27
 -13  14   0   11.75    1.20
 -13  14   0   10.64    1.11
  13  14   0    9.30    1.11
  13  14   0    9.81    1.21
 -14 -14   0    1.81    1.32
 -14 -14   0    2.46    1.19
  14 -14   0    2.64    0.93
  14 -14   0    1.43    0.87
 -14  14   0    0.82    0.80
  14  14   0    1.91    0.84
  14  14   0    2.71    0.97
  14  14   0    2.28    0.97
 -15 -14   0   14.98    1.73
 -15 -14   0   15.09    2.16
  15 -14   0   15.55    1.59
  15 -14   0   14.22    1.48
  15  14   0   14.78    1.72
 -15  14   0   14.93    1.43
  15  14   0   16.57    1.61
  15  14   0   16.72    1.54
  16 -14   0    0.28    0.90
 -16 -14   0   -1.46    1.22
  16 -14   0    0.46    1.01
  16  14   0   -0.78    0.92
 -16  14   0    0.29    0.85
  16  14   0    0.23    1.14
  16  14   0   -1.29    0.86
  17 -14   0    5.78    1.27
 -17 -14   0    1.16    1.34
  17  14   0    3.99    1.13
 -17  14   0    5.07    1.28
  17  14   0    6.00    1.31
 -18 -14   0   -1.45    1.41
  18 -14   0   -0.61    1.08
  18  14   0    1.05    1.08
  18  14   0   -0.62    1.15
   0 -15   0    1.67    0.45
   0 -15   0    1.38    0.34
   0 -15   0    0.93    0.39
   0 -15   0    4.69    0.67
   0 -15   0    1.47    0.38
   0  15   0    0.74    0.36
   0  15   0    1.16    0.38
   0  15   0    1.72    0.39
   0  15   0    3.37    0.47
  -1 -15   0   39.51    2.06
  -1 -15   0   42.51    2.13
   1 -15   0   41.68    2.09
  -1 -15   0   40.79    2.05
   1 -15   0   42.00    2.14
   1 -15   0   39.96    2.10
   1 -15   0   39.60    2.05
  -1 -15   0   43.18    2.15
  -1 -15   0   42.93    2.31
  -1  15   0   38.65    2.08
   1  15   0   39.28    2.12
  -1  15   0   38.98    2.07
   1  15   0   38.59    2.07
  -1  15   0   40.90    2.12
  -1  15   0   40.32    2.10
   1  15   0   38.58    2.09
   1  15   0   40.20    2.08
  -1  15   0   40.32    2.07
  -2 -15   0    0.02    0.31
  -2 -15   0    0.62    0.31
   2 -15   0    0.17    0.31
   2 -15   0    0.57    0.37
  -2 -15   0    0.55    0.41
   2 -15   0    1.31    0.40
  -2 -15   0    1.20    0.54
  -2 -15   0    0.21    0.31
  -2 -15   0    0.36    0.39
   2 -15   0    0.63    0.37
  -2  15   0    0.84    0.36
  -2  15   0    0.31    0.36
   2  15   0    1.64    0.40
   2  15   0    0.44    0.35
   2  15   0    0.99    0.38
   2  15   0    0.74    0.36
   2  15   0    0.42    0.43
  -2  15   0    0.99    0.45
  -2  15   0    0.49    0.34
   3 -15   0   33.94    1.84
   3 -15   0   34.21    1.84
  -3 -15   0   34.53    1.88
  -3 -15   0   32.78    1.73
   3 -15   0   34.83    1.82
   3 -15   0   35.46    1.80
  -3 -15   0   33.07    1.78
  -3 -15   0   31.56    2.06
  -3  15   0   34.20    1.79
   3  15   0   34.72    1.81
   3  15   0   34.55    1.82
   3  15   0   33.39    1.83
   3  15   0   32.57    1.96
  -3  15   0   31.40    1.94
   3  15   0   33.48    1.88
  -3  15   0   35.52    1.79
  -3  15   0   34.15    1.83
  -4 -15   0    1.04    0.61
  -4 -15   0    0.75    0.34
   4 -15   0    1.73    0.47
   4 -15   0    1.16    0.57
  -4 -15   0    1.03    0.48
  -4 -15   0    1.73    0.41
   4 -15   0    1.55    0.43
   4 -15   0    1.38    0.45
  -4 -15   0    0.99    0.39
   4 -15   0    1.10    0.38
  -4  15   0    1.51    0.47
   4  15   0    1.29    0.47
  -4  15   0    1.16    0.52
  -4  15   0    1.52    0.41
   4  15   0    1.26    0.45
   4  15   0    1.63    0.45
   4  15   0    1.36    0.42
   4  15   0    1.80    0.44
   4  15   0    1.83    0.56
   5 -15   0   24.06    1.45
  -5 -15   0   24.26    1.74
   5 -15   0   24.78    1.40
  -5 -15   0   24.59    1.49
  -5 -15   0   21.23    1.29
  -5 -15   0   23.67    1.40
   5 -15   0   25.95    1.43
  -5 -15   0   24.46    1.43
   5  15   0   24.58    1.44
   5  15   0   23.66    1.55
   5  15   0   25.50    1.45
   5  15   0   23.56    1.51
   5  15   0   24.64    1.73
  -5  15   0   25.92    1.48
   5  15   0   22.50    1.43
  -5  15   0   24.19    1.36
  -5  15   0   23.38    1.61
   6 -15   0   15.22    1.07
   6 -15   0   15.11    1.11
  -6 -15   0   17.00    1.48
  -6 -15   0   14.50    1.10
   6 -15   0   15.29    1.10
  -6 -15   0   12.32    1.09
  -6 -15   0   16.69    1.17
  -6 -15   0   13.88    0.91
   6  15   0   15.25    1.10
  -6  15   0   14.47    1.39
  -6  15   0   16.09    1.33
   6  15   0   13.55    1.21
   6  15   0   13.91    1.16
  -6  15   0   17.04    1.01
   6  15   0   16.63    1.12
   6  15   0   15.64    1.09
  -7 -15   0    5.21    0.79
  -7 -15   0    6.46    1.00
   7 -15   0    4.63    0.67
  -7 -15   0    5.53    0.71
  -7 -15   0    6.33    0.73
   7 -15   0    6.01    0.69
  -7 -15   0    4.78    0.51
   7 -15   0    6.29    0.73
  -7  15   0    3.84    0.54
   7  15   0    4.93    0.67
   7  15   0    5.74    0.85
   7  15   0    4.93    0.65
  -7  15   0    4.89    0.87
  -7  15   0    5.23    0.52
   7  15   0    4.60    0.76
  -7  15   0    4.74    0.66
   7  15   0    4.04    0.73
  -8 -15   0    8.03    0.87
  -8 -15   0    7.52    0.88
  -8 -15   0    5.76    0.59
   8 -15   0    6.44    0.79
   8 -15   0    8.60    0.88
  -8 -15   0    5.83    0.87
   8 -15   0    7.38    0.82
  -8 -15   0    8.07    1.16
  -8  15   0    8.92    0.71
   8  15   0    6.81    0.82
   8  15   0    8.59    0.96
   8  15   0    9.60    1.04
  -8  15   0    7.49    1.07
  -8  15   0    8.20    0.85
   8  15   0    8.04    0.81
  -8  15   0    6.97    0.67
  -9 -15   0    0.11    0.80
   9 -15   0    0.52    0.60
   9 -15   0   -0.55    0.51
  -9 -15   0   -0.45    0.73
   9 -15   0   -0.30    0.52
  -9 -15   0    0.88    0.60
   9  15   0   -0.13    0.64
   9  15   0    0.21    0.52
   9  15   0   -0.56    0.48
   9  15   0   -0.91    0.59
  -9  15   0    0.34    0.45
  -9  15   0   -0.68    0.52
  -9  15   0    0.74    0.80
  10 -15   0    2.60    0.72
  10 -15   0    1.77    0.70
  10 -15   0    3.31    0.76
 -10 -15   0    3.13    0.90
 -10 -15   0    3.90    1.10
 -10  15   0    2.65    0.61
  10  15   0    3.65    0.74
 -10  15   0    2.63    1.05
  10  15   0    4.15    0.71
  10  15   0    2.30    1.00
 -10  15   0    3.75    0.76
 -11 -15   0    5.99    1.28
  11 -15   0    3.08    0.77
 -11 -15   0    4.06    1.07
  11 -15   0    4.08    0.80
 -11  15   0    4.23    0.83
  11  15   0    4.21    0.91
  11  15   0    5.07    0.83
 -11  15   0    5.14    0.77
  11  15   0    5.08    0.86
 -12 -15   0   -0.82    0.97
  12 -15   0    0.03    0.69
  12 -15   0   -0.77    0.68
 -12 -15   0    0.86    0.94
  12  15   0   -0.30    0.76
  12  15   0   -0.29    0.68
  12  15   0    0.08    0.68
 -12  15   0    0.38    0.63
 -12  15   0    0.18    0.72
 -13 -15   0   38.99    2.68
 -13 -15   0   41.39    3.20
  13 -15   0   38.06    2.52
  13 -15   0   40.40    2.60
 -13  15   0   48.37    2.50
  13  15   0   39.77    2.56
  13  15   0   47.56    2.69
  13  15   0   40.10    2.68
 -13  15   0   48.11    2.60
 -14 -15   0   -0.36    1.27
  14 -15   0   -0.50    0.82
 -14 -15   0    0.82    1.10
  14 -15   0    0.19    0.85
  14  15   0   -0.19    0.87
 -14  15   0   -0.08    0.85
  14  15   0    1.07    0.94
  14  15   0    0.52    0.80
  15 -15   0    0.09    0.86
  15 -15   0    0.15    0.92
 -15 -15   0   -2.57    1.10
  15  15   0   -0.99    0.91
  15  15   0    0.15    0.88
  15  15   0   -1.87    0.93
  16 -15   0   -0.89    0.95
  16 -15   0    0.20    1.00
 -16 -15   0   -1.05    1.17
  16  15   0    0.62    1.03
  16  15   0    0.83    0.97
  16  15   0   -0.39    1.17
 -17 -15   0    0.86    1.37
  17 -15   0    1.63    1.16
  17  15   0    1.98    1.07
  17  15   0    4.30    1.17
 -18 -15   0   -0.04    1.45
  18 -15   0   -0.51    1.16
  18  15   0   -0.27    1.15
   0 -16   0   94.30    4.55
   0 -16   0   95.96    4.52
   0 -16   0   92.51    4.57
   0 -16   0   91.98    4.49
   0 -16   0   95.21    4.74
   0  16   0   92.11    4.54
   0  16   0   88.81    4.56
   0  16   0   97.11    4.52
   0  16   0   91.37    4.51
  -1 -16   0   12.82    0.99
  -1 -16   0   10.48    1.09
   1 -16   0   13.72    0.96
   1 -16   0   14.24    0.94
   1 -16   0   14.45    0.99
   1 -16   0   12.19    1.24
  -1 -16   0   13.19    0.97
   1 -16   0   13.66    0.86
  -1 -16   0   12.93    0.88
  -1 -16   0   11.76    0.86
  -1  16   0   13.63    1.00
   1  16   0   12.72    0.98
   1  16   0   13.17    0.92
   1  16   0   13.85    0.91
  -1  16   0   12.49    0.94
  -1  16   0   13.62    0.92
  -1  16   0   14.23    0.92
   1  16   0   13.63    0.93
  -2 -16   0   22.55    1.30
  -2 -16   0   22.60    1.31
   2 -16   0   26.08    1.36
  -2 -16   0   24.15    1.43
   2 -16   0   23.71    1.41
   2 -16   0   24.66    1.39
  -2 -16   0   23.09    1.41
  -2 -16   0   22.11    1.33
   2 -16   0   24.62    1.39
  -2 -16   0   23.82    1.61
  -2  16   0   23.43    1.50
   2  16   0   23.84    1.52
  -2  16   0   23.21    1.35
   2  16   0   24.74    1.37
  -2  16   0   23.96    1.35
   2  16   0   22.21    1.41
   2  16   0   24.18    1.38
  -2  16   0   23.37    1.38
   2  16   0   23.16    1.36
   3 -16   0   35.34    1.95
  -3 -16   0   35.03    1.90
  -3 -16   0   37.08    2.02
  -3 -16   0   36.86    2.23
   3 -16   0   37.67    1.94
   3 -16   0   37.04    1.99
   3 -16   0   36.64    1.97
  -3 -16   0   37.03    1.87
  -3  16   0   38.71    1.93
   3  16   0   36.77    1.95
   3  16   0   33.68    2.09
  -3  16   0   36.78    1.96
  -3  16   0   35.21    2.09
   3  16   0   36.05    1.95
   3  16   0   34.52    1.99
  -3  16   0   36.59    1.91
   3  16   0   37.15    1.96
  -4 -16   0    4.21    0.50
   4 -16   0    5.15    0.63
  -4 -16   0    4.98    0.69
  -4 -16   0    5.44    0.56
   4 -16   0    5.52    0.65
   4 -16   0    4.98    0.58
  -4 -16   0    5.08    0.88
  -4 -16   0    6.03    0.59
   4 -16   0    6.34    0.67
  -4  16   0    4.98    0.61
  -4  16   0    5.05    0.76
   4  16   0    4.35    0.59
   4  16   0    5.12    0.67
   4  16   0    5.45    0.62
  -4  16   0    5.98    0.60
   4  16   0    6.02    0.79
   4  16   0    5.39    0.62
  -5 -16   0    3.36    0.61
  -5 -16   0    3.37    0.46
   5 -16   0    3.39    0.57
  -5 -16   0    3.88    0.79
   5 -16   0    2.57    0.55
  -5 -16   0    2.58    0.56
  -5 -16   0    4.29    0.57
   5 -16   0    3.13    0.53
  -5  16   0    2.81    0.66
   5  16   0    3.88    0.60
   5  16   0    2.96    0.54
  -5  16   0    4.52    0.62
  -5  16   0    3.70    0.51
   5  16   0    3.68    0.70
   5  16   0    2.99    0.55
   5  16   0    3.38    0.65
  -6 -16   0    1.14    0.49
  -6 -16   0    1.32    0.68
   6 -16   0    0.89    0.50
   6 -16   0    0.17    0.50
  -6 -16   0    0.75    0.54
   6 -16   0    0.29    0.47
  -6 -16   0    0.28    0.36
  -6 -16   0   -2.10    0.53
   6  16   0    0.87    0.53
   6  16   0    0.90    0.48
   6  16   0    1.06    0.49
   6  16   0    0.00    0.45
  -6  16   0    0.47    0.63
  -6  16   0    1.08    0.43
   6  16   0    0.15    0.62
   7 -16   0   61.99    3.16
  -7 -16   0   67.21    3.23
   7 -16   0   65.71    3.20
  -7 -16   0   59.34    3.17
  -7 -16   0   54.04    2.99
   7 -16   0   64.61    3.17
  -7 -16   0   60.03    3.19
  -7 -16   0   56.60    3.56
   7  16   0   61.60    3.15
   7  16   0   61.00    3.32
  -7  16   0   62.51    3.45
  -7  16   0   60.23    3.05
   7  16   0   59.87    3.18
   7  16   0   58.45    3.26
  -7  16   0   66.54    3.22
  -8 -16   0    3.88    0.82
   8 -16   0    5.11    0.77
   8 -16   0    4.11    0.74
  -8 -16   0    5.92    0.86
  -8 -16   0    6.13    1.14
  -8 -16   0    6.20    0.84
   8 -16   0    5.21    0.74
   8  16   0    4.69    0.73
  -8  16   0    5.24    0.76
   8  16   0    4.25    0.68
  -8  16   0    6.32    0.63
  -8  16   0    5.29    1.02
   8  16   0    5.08    0.88
   8  16   0    4.91    0.84
  -9 -16   0    4.94    0.96
   9 -16   0    5.42    0.80
   9 -16   0    4.60    0.76
  -9 -16   0    6.43    1.20
  -9 -16   0    5.84    0.94
   9 -16   0    5.05    0.78
   9  16   0    5.14    0.74
  -9  16   0    4.33    1.02
  -9  16   0    4.68    0.79
   9  16   0    5.88    0.98
   9  16   0    4.02    0.73
   9  16   0    5.34    0.91
  -9  16   0    5.69    0.62
 -10 -16   0   -0.97    0.78
  10 -16   0    0.36    0.67
  10 -16   0    0.18    0.62
  10 -16   0    0.75    0.67
 -10 -16   0    0.58    0.97
  10  16   0    0.12    0.60
 -10  16   0    0.42    0.96
  10  16   0   -0.11    0.60
 -10  16   0   -0.06    0.65
 -11 -16   0    2.24    1.10
  11 -16   0    1.88    0.77
  11 -16   0    1.93    0.73
 -11 -16   0    3.42    1.00
  11  16   0    2.75    0.90
 -11  16   0    2.65    0.79
  11  16   0    2.38    0.74
  11  16   0    3.61    0.82
  12 -16   0    0.34    0.71
 -12 -16   0    1.20    1.13
 -12 -16   0    1.42    0.98
  12 -16   0    0.59    0.75
 -12  16   0    0.76    0.76
  12  16   0   -0.68    0.80
  12  16   0    0.68    0.77
  12  16   0    0.21    0.70
 -13 -16   0   -0.75    1.05
  13 -16   0    2.42    0.83
  13 -16   0    0.10    0.75
 -13 -16   0    0.12    1.19
 -13  16   0   -0.04    0.79
  13  16   0    0.27    0.92
  13  16   0   -0.61    0.74
  13  16   0   -1.30    0.77
 -14 -16   0    5.03    1.85
  14 -16   0    4.08    1.04
  14 -16   0    6.28    1.07
 -14 -16   0    4.23    1.27
  14  16   0    6.02    1.21
  14  16   0    6.75    1.16
  14  16   0    5.28    1.04
 -15 -16   0   -1.52    1.18
  15 -16   0    0.65    0.95
  15 -16   0   -0.75    0.86
  15  16   0   -1.13    0.84
  15  16   0   -0.45    0.93
  15  16   0    0.15    1.06
  16 -16   0    2.76    1.17
 -16 -16   0    3.80    1.43
  16  16   0    3.11    1.15
  16  16   0    5.25    1.16
  16  16   0    4.56    1.67
  17 -16   0    6.87    1.37
 -17 -16   0    5.00    1.59
  17  16   0    5.83    1.27
  17  16   0    4.08    1.28
   0 -17   0    0.42    0.49
   0 -17   0    0.28    0.42
   0 -17   0    0.35    0.43
   0 -17   0    0.56    0.39
   0 -17   0    0.27    0.33
   0  17   0    0.08    0.36
   0  17   0    0.56    0.39
   0  17   0    0.31    0.40
   0  17   0    0.01    0.39
  -1 -17   0    4.10    0.51
  -1 -17   0    4.34    0.52
   1 -17   0    5.48    0.64
   1 -17   0    5.28    0.52
   1 -17   0    4.58    0.75
  -1 -17   0    4.57    0.76
   1 -17   0    5.14    0.61
  -1 -17   0    4.59    0.64
  -1 -17   0    4.39    0.60
   1 -17   0    5.95    0.60
  -1  17   0    5.17    0.58
   1  17   0    5.41    0.57
  -1  17   0    4.90    0.56
   1  17   0    4.52    0.68
   1  17   0    5.16    0.58
   1  17   0    4.69    0.63
   1  17   0    4.10    0.56
   2 -17   0   -0.04    0.41
  -2 -17   0    0.07    0.54
   2 -17   0   -0.09    0.41
  -2 -17   0   -0.22    0.43
  -2 -17   0   -0.44    0.31
  -2 -17   0    0.21    0.37
  -2 -17   0    0.38    0.46
   2 -17   0   -0.24    0.39
   2 -17   0    0.14    0.36
  -2 -17   0   -0.24    0.36
  -2  17   0    0.04    0.40
   2  17   0    0.01    0.38
   2  17   0   -0.32    0.37
   2  17   0   -0.10    0.39
  -2  17   0   -0.25    0.36
  -2  17   0   -0.37    0.45
   2  17   0   -0.11    0.42
  -2  17   0    0.20    0.39
  -3 -17   0    2.49    0.58
   3 -17   0    3.13    0.55
  -3 -17   0    2.79    0.72
   3 -17   0    3.65    0.57
  -3 -17   0    2.96    0.46
   3 -17   0    3.50    0.56
   3 -17   0    3.67    0.52
  -3 -17   0    2.12    0.43
   3  17   0    1.79    0.63
  -3  17   0    3.43    0.52
  -3  17   0    2.14    0.59
  -3  17   0    3.22    0.49
   3  17   0    2.40    0.51
   3  17   0    3.65    0.55
   3  17   0    1.84    0.49
  -3  17   0    3.25    0.50
   3  17   0    1.77    0.56
  -4 -17   0    0.30    0.49
  -4 -17   0    0.28    0.36
   4 -17   0   -0.02    0.43
   4 -17   0   -0.05    0.38
   4 -17   0   -0.17    0.44
  -4 -17   0    0.99    0.67
   4 -17   0    0.47    0.49
  -4 -17   0    0.10    0.38
   4  17   0   -0.33    0.54
   4  17   0    0.56    0.43
   4  17   0    0.19    0.41
  -4  17   0   -0.21    0.40
  -4  17   0    0.25    0.45
  -4  17   0   -0.08    0.50
   4  17   0    0.24    0.48
   4  17   0    0.49    0.47
  -5 -17   0   -0.62    0.48
  -5 -17   0   -0.84    0.40
   5 -17   0   -0.04    0.45
  -5 -17   0   -0.50    0.35
  -5 -17   0   -0.39    0.61
   5 -17   0   -0.29    0.38
  -5 -17   0   -0.25    0.43
   5 -17   0    0.35    0.48
   5  17   0   -0.23    0.51
   5  17   0    0.03    0.47
  -5  17   0   -0.23    0.39
   5  17   0    0.30    0.47
   5  17   0   -0.12    0.44
   5  17   0   -0.81    0.49
  -5  17   0    0.35    0.56
  -6 -17   0    0.31    0.60
   6 -17   0    1.16    0.53
  -6 -17   0    0.78    0.76
  -6 -17   0   -0.86    0.52
  -6 -17   0    0.45    0.40
  -6 -17   0   -1.73    0.57
   6 -17   0    1.21    0.50
   6 -17   0    0.39    0.53
  -6  17   0    0.90    0.67
   6  17   0    0.94    0.52
   6  17   0    1.25    0.68
  -6  17   0    0.41    0.43
   6  17   0    0.89    0.62
   6  17   0   -0.40    0.55
   6  17   0    1.09    0.55
   7 -17   0    0.20    0.54
  -7 -17   0    0.15    0.76
  -7 -17   0    0.49    0.41
   7 -17   0    0.31    0.49
   7 -17   0    0.21    0.54
  -7 -17   0    1.08    0.62
  -7 -17   0    0.57    0.57
  -7 -17   0   -0.37    0.56
  -7  17   0    0.31    0.50
   7  17   0    1.02    0.56
   7  17   0    0.29    0.52
   7  17   0    0.08    0.63
  -7  17   0    1.48    0.72
   7  17   0    1.18    0.65
  -7  17   0    0.14    0.44
   8 -17   0    1.65    0.65
  -8 -17   0    2.03    0.72
  -8 -17   0    0.52    0.84
   8 -17   0    1.48    0.65
   8 -17   0    1.21    0.57
  -8 -17   0    0.36    0.45
  -8  17   0    1.06    0.48
   8  17   0    1.96    0.79
  -8  17   0    2.48    0.91
  -8  17   0    1.00    0.60
   8  17   0    1.76    0.62
   8  17   0    1.08    0.94
   8  17   0    1.30    0.58
  -9 -17   0   11.33    1.51
  -9 -17   0   13.97    1.25
   9 -17   0   11.25    1.11
   9 -17   0    9.97    1.06
   9 -17   0   10.64    1.06
   9  17   0   12.22    1.05
  -9  17   0   10.83    0.92
  -9  17   0   11.92    1.47
   9  17   0    9.79    1.06
   9  17   0   10.99    1.19
  -9  17   0   11.85    1.11
 -10 -17   0    1.26    1.05
  10 -17   0    1.46    0.81
 -10 -17   0    1.20    0.90
  10 -17   0    0.56    0.67
  10 -17   0    0.27    0.68
 -10  17   0    2.34    1.04
  10  17   0    0.92    0.68
  10  17   0    1.60    0.68
 -10  17   0    1.86    0.75
 -11 -17   0   10.94    1.66
  11 -17   0   11.99    1.22
  11 -17   0   11.39    1.21
 -11 -17   0   12.70    1.36
  11  17   0   10.09    1.12
  11  17   0   11.49    1.30
 -11  17   0   12.44    1.19
 -11  17   0   14.66    1.73
  11  17   0   12.84    1.21
 -12 -17   0   -2.07    0.93
  12 -17   0   -0.67    0.73
  12 -17   0   -0.28    0.75
 -12 -17   0   -0.26    1.09
 -12  17   0    0.81    0.82
  12  17   0   -0.41    0.70
  12  17   0   -0.68    0.82
  12  17   0    1.65    0.79
 -13 -17   0    1.56    1.41
  13 -17   0    0.89    0.84
 -13 -17   0   -0.41    1.09
  13 -17   0    0.79    0.86
  13  17   0   -0.49    0.74
  13  17   0    0.42    0.84
  13  17   0    0.35    0.93
 -13  17   0    1.54    0.90
  14 -17   0    4.20    1.06
  14 -17   0    2.36    0.92
 -14 -17   0    1.74    1.19
  14  17   0    2.56    1.10
  14  17   0    2.44    0.97
  14  17   0    4.01    0.97
  15 -17   0    0.61    0.99
  15 -17   0    1.02    0.92
 -15 -17   0   -0.28    1.18
  15  17   0   -0.52    1.06
  15  17   0    1.26    0.90
  15  17   0    2.65    1.03
 -16 -17   0   -1.49    1.30
  16 -17   0   -0.84    1.05
  16  17   0    0.71    1.04
  16  17   0    0.36    1.00
  17 -17   0    1.70    1.22
 -17 -17   0   -0.66    1.39
  17  17   0    0.23    1.02
  17  17   0    2.14    1.13
   0 -18   0    0.15    0.42
   0 -18   0    0.94    0.48
   0 -18   0   -0.02    0.44
   0 -18   0    0.43    0.35
   0 -18   0   -1.08    0.66
   0  18   0    0.16    0.39
   0  18   0    0.70    0.42
   0  18   0    0.23    0.41
  -1 -18   0   25.98    1.80
   1 -18   0   25.86    1.57
  -1 -18   0   26.93    1.63
   1 -18   0   29.41    1.57
   1 -18   0   27.77    1.61
   1 -18   0   27.60    1.50
  -1 -18   0   25.76    1.59
  -1 -18   0   26.17    1.47
   1  18   0   27.41    1.55
   1  18   0   28.79    1.57
  -1  18   0   26.07    1.52
   1  18   0   25.12    1.51
   1  18   0   25.99    1.91
  -1  18   0   27.08    1.52
   1  18   0   26.02    1.66
  -2 -18   0    0.11    0.48
  -2 -18   0    0.28    0.47
  -2 -18   0   -0.31    0.35
  -2 -18   0   -0.45    0.39
  -2 -18   0   -0.32    0.55
  -2 -18   0    0.19    0.34
   2 -18   0   -0.75    0.35
   2 -18   0   -0.23    0.46
   2 -18   0    0.25    0.45
   2 -18   0    0.27    0.46
  -2  18   0   -0.48    0.48
   2  18   0   -0.43    0.41
  -2  18   0   -0.64    0.39
   2  18   0    0.13    0.45
   2  18   0    0.01    0.53
   2  18   0   -0.62    0.40
  -2  18   0   -0.37    0.58
  -2  18   0   -0.19    0.37
   2  18   0    0.22    0.42
   3 -18   0    2.43    0.47
   3 -18   0    2.04    0.54
   3 -18   0    1.99    0.53
  -3 -18   0    1.36    0.44
   3 -18   0    2.02    0.70
  -3 -18   0    1.18    0.70
  -3 -18   0    2.61    0.47
  -3 -18   0    1.79    0.57
   3  18   0    1.69    0.47
  -3  18   0    2.10    0.48
   3  18   0    1.76    0.51
   3  18   0    2.11    0.58
  -3  18   0    1.56    0.60
   3  18   0    2.30    0.64
   3  18   0    2.13    0.54
  -3  18   0    2.33    0.51
  -3  18   0    2.01    0.50
  -4 -18   0    3.33    0.83
   4 -18   0    3.66    0.60
  -4 -18   0    3.00    0.64
  -4 -18   0    2.80    0.48
   4 -18   0    3.01    0.60
   4 -18   0    3.04    0.52
  -4 -18   0    3.22    0.53
   4  18   0    2.21    0.54
   4  18   0    2.78    0.57
   4  18   0    2.73    0.57
   4  18   0    3.11    0.63
  -4  18   0    3.66    0.75
   4  18   0    3.22    0.71
  -4  18   0    2.60    0.54
  -5 -18   0   41.93    2.41
  -5 -18   0   45.79    2.37
  -5 -18   0   42.41    2.84
  -5 -18   0   49.16    2.58
   5 -18   0   48.86    2.49
   5 -18   0   47.71    2.53
  -5 -18   0   45.48    2.47
   5 -18   0   46.28    2.49
   5  18   0   47.30    2.61
   5  18   0   44.86    2.63
  -5  18   0   48.61    2.72
  -5  18   0   49.73    2.44
   5  18   0   47.07    2.51
   5  18   0   47.75    2.49
   5  18   0   48.57    2.53
  -6 -18   0   -0.55    0.54
   6 -18   0    0.74    0.55
   6 -18   0    0.15    0.52
  -6 -18   0    0.09    0.42
  -6 -18   0   -0.18    0.59
  -6 -18   0   -0.30    0.69
   6 -18   0   -0.12    0.50
   6  18   0   -0.21    0.66
  -6  18   0   -0.39    0.68
   6  18   0   -0.47    0.52
  -6  18   0    0.72    0.45
   6  18   0   -0.14    0.66
   6  18   0   -0.04    0.54
  -7 -18   0  172.24    8.29
  -7 -18   0  183.40    8.41
   7 -18   0  176.09    8.30
  -7 -18   0  176.61    8.81
   7 -18   0  170.79    8.34
  -7 -18   0  160.49    8.16
   7 -18   0  170.77    8.32
   7  18   0  173.77    8.35
  -7  18   0  164.76    8.21
   7  18   0  179.96    8.32
   7  18   0  173.62    8.48
  -7  18   0  170.88    8.59
  -8 -18   0    1.47    0.90
   8 -18   0    2.48    0.69
   8 -18   0    0.17    0.59
  -8 -18   0    0.33    0.72
  -8 -18   0    1.36    0.57
   8 -18   0    1.10    0.67
   8  18   0    1.31    0.84
   8  18   0    1.84    0.64
  -8  18   0    0.62    0.50
   8  18   0    0.83    0.62
  -8  18   0    1.44    0.89
  -8  18   0    0.75    0.62
  -9 -18   0   33.38    2.18
   9 -18   0   37.32    2.19
   9 -18   0   34.96    2.17
  -9 -18   0   32.95    2.63
   9 -18   0   37.49    2.20
  -9  18   0   33.56    1.96
  -9  18   0   35.59    2.55
   9  18   0   38.41    2.18
   9  18   0   35.79    2.32
  -9  18   0   38.95    2.20
   9  18   0   40.05    2.17
  10 -18   0   -0.11    0.71
 -10 -18   0   -0.81    0.78
  10 -18   0    0.47    0.79
  10 -18   0   -0.09    0.69
 -10 -18   0   -0.02    1.02
  10  18   0    1.09    0.68
 -10  18   0    0.61    0.69
  10  18   0    0.00    0.64
 -10  18   0    0.92    1.03
  11 -18   0   -1.50    0.65
 -11 -18   0   -0.58    1.00
  11 -18   0   -0.39    0.73
 -11 -18   0   -0.98    0.93
 -11  18   0   -0.96    1.07
  11  18   0   -1.41    0.79
  11  18   0   -0.22    0.70
  11  18   0   -0.37    0.66
 -11  18   0    0.14    0.70
 -12 -18   0    1.42    1.07
  12 -18   0    0.42    0.81
  12 -18   0    3.13    0.92
 -12 -18   0    2.97    1.47
  12  18   0    2.91    1.02
  12  18   0    2.58    0.88
 -12  18   0    2.85    0.89
  12  18   0    2.23    0.85
  13 -18   0    1.18    0.89
 -13 -18   0   -1.77    1.04
  13 -18   0    1.45    0.85
  13  18   0    1.29    0.99
  13  18   0    0.33    0.87
  13  18   0    1.00    0.84
 -13  18   0    1.09    0.93
  14 -18   0   -0.54    0.89
  14 -18   0    0.41    0.91
 -14 -18   0   -1.32    1.18
  14  18   0   -0.96    0.84
  14  18   0    0.74    0.98
  14  18   0    0.27    0.87
  15 -18   0    1.94    1.03
  15 -18   0    1.73    1.08
 -15 -18   0    1.84    1.31
  15  18   0    1.41    1.01
  15  18   0    1.96    0.98
  15  18   0    2.01    1.19
  16 -18   0   -2.53    0.96
 -16 -18   0   -1.57    1.29
  16  18   0   -1.18    0.98
  16  18   0   -0.02    0.95
  17 -18   0    2.17    1.23
 -17 -18   0    2.08    1.44
  17  18   0    2.06    1.27
  17  18   0    2.11    1.20
   0 -19   0    0.51    0.39
   0 -19   0   -0.18    0.48
   0 -19   0    0.03    0.48
   0  19   0    0.29    0.41
   0  19   0   -0.30    0.42
   0  19   0   -0.33    0.43
  -1 -19   0   22.46    1.46
  -1 -19   0   21.16    1.27
   1 -19   0   21.05    1.40
   1 -19   0   23.46    1.45
  -1 -19   0   22.13    1.41
   1 -19   0   22.13    1.31
  -1  19   0   22.15    1.35
   1  19   0   20.43    1.35
   1  19   0   21.06    1.36
   1  19   0   21.92    1.33
   1  19   0   21.08    1.51
  -1  19   0   21.72    1.34
   2 -19   0    3.72    0.56
   2 -19   0    2.95    0.59
  -2 -19   0    3.79    0.53
  -2 -19   0    3.86    0.51
  -2 -19   0    3.71    0.65
  -2 -19   0    3.90    0.64
   2 -19   0    4.59    0.68
  -2 -19   0    3.53    0.82
  -2  19   0    3.76    0.56
   2  19   0    2.49    0.68
   2  19   0    3.45    0.60
   2  19   0    3.77    0.57
  -2  19   0    3.84    0.57
   2  19   0    3.55    0.59
  -2  19   0    2.87    0.68
  -3 -19   0   33.30    1.78
   3 -19   0   35.85    1.87
   3 -19   0   31.19    1.93
   3 -19   0   32.69    1.89
  -3 -19   0   31.62    1.83
  -3 -19   0   32.93    2.23
  -3 -19   0   35.79    1.99
   3  19   0   31.80    1.88
   3  19   0   34.90    1.88
  -3  19   0   35.04    2.10
  -3  19   0   36.33    1.87
  -3  19   0   32.97    1.84
   3  19   0   33.30    1.90
   3  19   0   30.42    2.05
   4 -19   0    0.89    0.56
   4 -19   0    0.21    0.47
  -4 -19   0    0.49    0.71
  -4 -19   0    0.07    0.41
  -4 -19   0    0.32    0.49
  -4 -19   0   -0.08    0.55
   4 -19   0    1.00    0.55
   4  19   0   -0.86    0.49
  -4  19   0    0.35    0.45
   4  19   0    0.70    0.49
   4  19   0   -0.47    0.58
   4  19   0    0.50    0.51
  -4  19   0   -0.57    0.55
   5 -19   0   24.23    1.48
  -5 -19   0   24.28    1.60
   5 -19   0   24.23    1.51
   5 -19   0   24.83    1.55
  -5 -19   0   22.68    1.37
  -5 -19   0   20.83    1.88
   5  19   0   22.44    1.67
  -5  19   0   24.74    1.76
  -5  19   0   24.07    1.43
   5  19   0   23.90    1.87
   5  19   0   23.53    1.49
   5  19   0   21.47    1.49
   6 -19   0   -0.08    0.54
   6 -19   0   -1.35    0.48
  -6 -19   0   -1.54    0.44
  -6 -19   0    0.11    0.65
   6 -19   0   -1.37    0.55
  -6 -19   0   -0.77    0.60
  -6 -19   0   -0.47    0.76
  -6  19   0   -0.23    0.76
   6  19   0   -0.25    0.67
   6  19   0    0.15    0.54
   6  19   0   -1.33    0.53
  -6  19   0   -0.87    0.47
  -7 -19   0   11.54    0.94
   7 -19   0   13.68    1.13
   7 -19   0   12.26    1.14
   7 -19   0   10.76    1.05
  -7 -19   0   11.91    1.14
  -7 -19   0   14.15    1.57
   7  19   0   15.51    1.19
  -7  19   0   13.23    1.45
  -7  19   0   13.32    1.02
   7  19   0   12.75    1.34
   7  19   0   13.10    1.14
   8 -19   0   -0.39    0.58
  -8 -19   0    0.57    0.72
   8 -19   0   -0.51    0.61
  -8 -19   0   -0.09    0.86
   8 -19   0    0.64    0.69
   8  19   0   -0.86    0.58
   8  19   0    0.85    0.62
  -8  19   0    0.45    0.61
   8  19   0    0.51    0.76
  -8  19   0   -0.41    0.85
  -8  19   0   -0.71    0.49
   9 -19   0    3.93    0.82
   9 -19   0    3.53    0.82
   9 -19   0    3.48    0.79
  -9 -19   0    1.84    0.87
  -9 -19   0    6.34    1.28
  -9  19   0    4.27    1.14
  -9  19   0    3.88    0.62
   9  19   0    5.37    0.79
   9  19   0    4.77    0.94
   9  19   0    2.92    0.76
  -9  19   0    4.42    0.82
  10 -19   0   -0.22    0.69
  10 -19   0   -0.34    0.67
  10 -19   0    0.85    0.90
 -10 -19   0   -1.81    0.78
 -10 -19   0    0.48    1.01
  10  19   0   -0.28    0.67
 -10  19   0    0.16    0.73
  10  19   0    0.57    0.67
 -10  19   0   -0.09    1.01
 -11 -19   0    1.27    1.91
 -11 -19   0   -2.23    0.90
  11 -19   0    0.81    0.74
  11 -19   0   -1.33    0.72
 -11  19   0   -0.85    0.74
 -11  19   0    0.68    1.16
  11  19   0    0.58    0.77
  11  19   0   -0.01    0.69
  12 -19   0    0.86    0.87
  12 -19   0    0.97    0.86
 -12 -19   0    0.30    1.06
  12  19   0    0.95    0.86
  12  19   0    2.41    1.02
 -12  19   0    1.52    0.88
  12  19   0    2.98    0.84
  13 -19   0    5.01    1.07
 -13 -19   0    1.18    1.23
  13 -19   0    4.12    1.06
  13  19   0    5.03    1.06
  13  19   0    4.22    0.99
 -13  19   0    5.28    1.27
  13  19   0    2.38    1.07
 -14 -19   0    1.38    1.26
  14 -19   0    2.81    1.05
  14 -19   0    2.72    0.99
  14  19   0    1.67    1.03
  14  19   0    3.08    0.98
  14  19   0    3.23    1.17
  15 -19   0    1.59    1.09
 -15 -19   0   -0.75    1.34
  15  19   0    1.92    1.02
  15  19   0    0.42    1.00
 -16 -19   0    1.27    1.36
  16 -19   0    2.41    1.18
  16  19   0    1.23    1.06
  16  19   0    0.69    1.08
   0 -20   0   11.34    1.04
   0 -20   0   12.02    0.91
   0 -20   0   12.80    1.04
   0  20   0   11.35    0.95
   0  20   0   10.64    0.94
   0  20   0   10.15    0.94
  -1 -20   0   -0.19    0.53
   1 -20   0    1.01    0.60
  -1 -20   0   -0.39    0.43
   1 -20   0   -0.20    0.50
   1 -20   0   -0.07    0.43
  -1 -20   0   -1.40    0.57
  -1  20   0   -0.11    0.48
   1  20   0    0.25    0.47
  -1  20   0    0.24    0.48
   1  20   0   -0.04    0.55
   1  20   0    0.09    0.50
   1  20   0   -1.11    0.48
  -2 -20   0    6.56    0.69
  -2 -20   0    8.17    0.74
   2 -20   0    8.40    0.81
   2 -20   0    7.81    0.82
   2 -20   0    9.76    0.95
  -2 -20   0    8.36    0.90
  -2  20   0    8.92    0.79
   2  20   0    6.93    0.96
   2  20   0    7.97    0.82
  -2  20   0    9.02    0.81
  -2  20   0    7.15    0.98
   2  20   0    7.40    0.80
   2  20   0    7.45    0.75
   3 -20   0    2.64    0.57
  -3 -20   0    3.64    0.71
   3 -20   0    3.65    0.70
  -3 -20   0    3.21    0.53
   3 -20   0    2.76    0.64
   3  20   0    2.86    0.56
   3  20   0    3.88    0.61
   3  20   0    1.91    0.78
  -3  20   0    2.99    0.78
  -3  20   0    1.95    0.57
   3  20   0    3.87    0.67
  -3  20   0    4.23    0.62
   4 -20   0    7.27    0.79
   4 -20   0    7.57    0.89
  -4 -20   0    6.46    1.46
  -4 -20   0    7.32    0.90
   4 -20   0    8.54    0.86
  -4 -20   0    7.69    0.71
   4  20   0    8.64    1.02
   4  20   0    6.69    0.78
   4  20   0    8.48    0.88
  -4  20   0    7.52    0.99
  -4  20   0    7.03    0.75
   4  20   0    6.71    0.81
   5 -20   0   10.65    1.04
  -5 -20   0   10.22    0.85
  -5 -20   0    9.96    1.41
   5 -20   0   11.25    0.97
  -5 -20   0   11.85    1.11
   5 -20   0   11.23    0.99
   5  20   0   10.79    1.17
  -5  20   0    9.72    1.21
   5  20   0   10.00    0.96
  -5  20   0   10.19    0.89
   5  20   0   10.75    0.99
  -6 -20   0    0.47    0.84
  -6 -20   0    0.58    0.66
   6 -20   0    1.17    0.68
   6 -20   0    0.79    0.64
   6 -20   0   -0.30    0.55
  -6 -20   0    1.57    0.51
   6  20   0    1.85    0.61
   6  20   0    1.68    0.63
  -6  20   0    1.65    0.56
  -6  20   0    1.15    0.85
   6  20   0    1.17    0.77
   7 -20   0   14.80    1.23
   7 -20   0   14.64    1.21
   7 -20   0   15.26    1.26
  -7 -20   0   12.51    0.98
  -7 -20   0   12.13    1.58
  -7  20   0   12.43    1.07
   7  20   0   14.62    1.23
   7  20   0   14.30    1.21
  -7  20   0   14.03    1.53
   7  20   0   14.82    1.46
  -8 -20   0    3.78    1.27
   8 -20   0    2.77    0.76
   8 -20   0    2.50    0.80
   8 -20   0    2.66    0.72
   8  20   0    3.02    0.78
  -8  20   0    2.91    0.62
  -8  20   0    3.68    0.78
   8  20   0    2.47    0.73
   8  20   0    2.57    0.94
  -8  20   0    3.06    1.06
   9 -20   0    6.63    0.95
   9 -20   0    8.15    0.98
  -9 -20   0    3.99    1.11
   9 -20   0    8.37    1.03
  -9  20   0    7.37    0.98
  -9  20   0    7.45    0.80
   9  20   0    9.79    1.04
   9  20   0   12.05    1.40
   9  20   0    8.32    1.02
  -9  20   0    7.44    1.33
  10 -20   0   -0.74    0.96
  10 -20   0   -1.24    0.68
  10 -20   0   -0.06    0.69
 -10 -20   0   -2.12    0.80
 -10  20   0   -0.85    1.00
  10  20   0   -0.17    0.71
  10  20   0    1.21    0.72
 -10  20   0   -0.77    0.68
 -11 -20   0    2.81    1.14
  11 -20   0    4.52    0.94
  11 -20   0    4.50    0.93
  11  20   0    5.91    1.02
 -11  20   0    5.68    0.97
 -11  20   0    5.00    1.37
  11  20   0    4.74    0.97
  12 -20   0    1.97    0.89
 -12 -20   0    3.26    1.13
  12 -20   0    2.92    0.96
  12  20   0    4.33    1.11
 -12  20   0    4.12    1.00
 -12  20   0    5.02    1.51
  12  20   0    2.79    0.93
  12  20   0    2.86    0.96
  13 -20   0    0.44    0.94
 -13 -20   0   -0.67    1.20
  13 -20   0    0.14    0.92
  13  20   0   -0.28    0.85
  13  20   0   -0.98    0.98
 -13  20   0    0.55    1.15
  13  20   0    0.09    0.81
 -14 -20   0   -0.30    1.29
  14 -20   0    3.25    1.08
  14 -20   0    2.05    1.03
  14  20   0    2.32    1.13
  14  20   0    3.16    0.98
  14  20   0    3.21    1.09
 -15 -20   0    0.08    1.33
  15 -20   0   -0.18    1.10
  15  20   0    0.17    1.03
  15  20   0    2.74    1.05
  16 -20   0    1.37    1.18
 -16 -20   0   -0.18    1.34
  16  20   0    0.99    1.12
  16  20   0    1.54    1.06
   0 -21   0   -0.04    0.61
   0 -21   0    0.22    0.56
   0 -21   0    0.06    0.47
   0  21   0   -0.79    0.50
   0  21   0    0.16    0.55
   0  21   0   -0.32    0.47
   0  21   0   -0.22    0.47
  -1 -21   0    1.25    0.51
   1 -21   0    1.94    0.67
  -1 -21   0    1.95    0.71
   1 -21   0    2.67    0.66
  -1 -21   0    2.66    0.65
   1 -21   0    1.95    0.54
   1  21   0    1.63    0.70
  -1  21   0    1.33    0.53
   1  21   0    3.96    0.66
   1  21   0    2.63    0.62
   1  21   0    2.27    0.56
  -1  21   0    3.38    0.62
  -2 -21   0    0.39    0.65
  -2 -21   0    0.75    0.59
   2 -21   0    1.01    0.52
   2 -21   0    1.33    0.63
   2 -21   0    0.86    0.57
  -2 -21   0    0.86    0.47
  -2  21   0    0.89    0.55
   2  21   0    0.06    0.53
  -2  21   0    0.51    0.52
   2  21   0    0.58    0.51
   2  21   0    0.91    0.60
  -2  21   0    0.08    0.67
   2  21   0   -1.03    0.74
   3 -21   0   -0.38    0.48
   3 -21   0   -0.22    0.57
  -3 -21   0    0.80    0.47
   3 -21   0   -0.40    0.56
  -3 -21   0    0.24    0.63
  -3  21   0    0.37    0.69
   3  21   0   -0.01    0.68
   3  21   0   -0.11    0.52
  -3  21   0   -1.15    0.50
  -3  21   0   -0.22    0.51
   3  21   0   -0.69    0.50
   3  21   0   -0.22    0.56
   4 -21   0    7.95    0.90
   4 -21   0    7.59    0.84
   4 -21   0    7.27    0.93
  -4 -21   0    8.87    1.01
  -4 -21   0    9.80    0.81
  -4  21   0    8.49    0.84
   4  21   0    9.94    0.95
  -4  21   0    8.93    1.12
   4  21   0    9.54    0.90
   4  21   0    9.95    1.14
   5 -21   0    0.48    0.67
  -5 -21   0    1.51    0.52
   5 -21   0    0.35    0.63
  -5 -21   0    0.93    0.69
   5 -21   0    0.65    0.58
   5  21   0    0.15    0.70
  -5  21   0    1.25    0.78
   5  21   0    1.13    0.63
  -5  21   0    0.96    0.57
   5  21   0    1.10    0.59
   6 -21   0    2.76    0.74
   6 -21   0    4.48    0.76
  -6 -21   0    3.46    0.58
   6 -21   0    3.40    0.71
   6  21   0    3.86    0.93
   6  21   0    3.73    0.76
  -6  21   0    4.86    1.06
   6  21   0    4.02    0.74
  -6  21   0    4.17    0.67
  -7 -21   0   -0.38    0.57
   7 -21   0    0.59    0.66
   7 -21   0   -0.29    0.57
   7 -21   0   -1.11    0.60
   7  21   0   -0.90    0.59
   7  21   0   -0.12    0.61
  -7  21   0    0.07    0.85
  -7  21   0   -0.87    0.51
   7  21   0    1.12    0.81
   8 -21   0    1.17    0.71
   8 -21   0    1.74    0.71
   8 -21   0    2.56    0.76
  -8  21   0    1.66    0.61
   8  21   0    2.11    0.73
  -8  21   0    1.13    1.00
   8  21   0    1.74    0.75
  -8  21   0    1.79    0.75
   8  21   0    3.29    0.94
   9 -21   0   -0.15    0.75
   9 -21   0    0.20    0.66
   9 -21   0    0.88    0.75
  -9  21   0    1.40    1.04
   9  21   0    0.76    0.74
  -9  21   0    0.34    0.58
  -9  21   0    1.72    0.73
   9  21   0   -1.57    0.68
  10 -21   0    4.42    0.94
  10 -21   0    2.76    1.17
  10 -21   0    4.06    0.92
  10  21   0    4.40    0.94
 -10  21   0    7.31    1.37
  10  21   0    4.29    0.94
 -10  21   0    5.03    0.94
  11 -21   0   -0.30    0.77
  11 -21   0    1.26    0.86
  11  21   0   -0.89    0.76
 -11  21   0    1.02    1.20
 -11  21   0   -0.45    0.82
  11  21   0   -0.04    0.78
  12 -21   0   -2.42    0.83
 -12 -21   0   -2.97    1.56
  12 -21   0   -0.81    0.88
  12  21   0    0.11    0.97
  12  21   0    1.34    0.93
  12  21   0    0.12    0.85
 -12  21   0   -1.21    0.91
 -12  21   0   -1.11    1.33
 -13 -21   0    6.37    1.49
  13 -21   0    4.50    1.10
  13 -21   0    5.25    1.11
  13  21   0    7.71    1.16
  13  21   0    6.04    1.18
  13  21   0    4.68    1.26
 -13  21   0    6.78    1.59
  14 -21   0    1.70    1.08
 -14 -21   0   -1.35    1.23
  14  21   0    1.57    1.04
  14  21   0   -0.28    0.98
 -15 -21   0   -1.12    1.27
  15 -21   0    0.11    1.05
  15  21   0    1.01    1.07
  15  21   0    1.57    1.15
  16 -21   0    2.52    1.23
 -16 -21   0    0.29    1.35
  16  21   0    0.95    1.15
   0 -22   0    4.55    0.68
   0 -22   0    5.83    0.82
   0 -22   0    4.70    0.83
   0  22   0    3.30    0.85
   0  22   0    4.97    0.70
   0  22   0    6.36    0.77
   0  22   0    3.54    0.69
  -1 -22   0   30.44    1.65
   1 -22   0   29.09    1.77
   1 -22   0   29.27    1.82
  -1 -22   0   31.94    1.87
  -1 -22   0   27.44    1.77
   1 -22   0   28.88    1.69
   1  22   0   28.77    1.69
   1  22   0   28.84    1.73
  -1  22   0   26.52    1.71
   1  22   0   25.48    1.71
  -1  22   0   27.17    1.89
  -1  22   0   29.64    1.70
   1  22   0   22.32    1.86
   2 -22   0   17.55    1.42
  -2 -22   0   16.42    1.41
  -2 -22   0   17.30    1.18
   2 -22   0   17.77    1.27
   2 -22   0   18.04    1.37
   2  22   0   18.77    1.33
   2  22   0   17.61    1.25
  -2  22   0   20.00    1.30
   2  22   0   17.12    1.59
   2  22   0   16.98    1.33
  -2  22   0   14.92    1.51
  -2  22   0   17.34    1.29
   3 -22   0    6.44    0.77
  -3 -22   0    6.90    0.94
   3 -22   0    6.75    0.91
   3 -22   0    7.02    0.87
  -3 -22   0    6.95    0.71
   3  22   0    5.40    0.75
   3  22   0    6.60    0.82
   3  22   0    5.67    0.99
  -3  22   0    5.00    0.96
  -3  22   0    6.81    0.79
  -3  22   0    6.53    0.79
   3  22   0    6.47    0.84
  -4 -22   0    0.58    0.50
   4 -22   0    0.07    0.65
   4 -22   0   -0.01    0.54
   4 -22   0    1.66    0.69
  -4 -22   0    0.52    0.69
  -4  22   0    0.12    0.55
   4  22   0    0.14    0.55
   4  22   0    0.46    0.59
   4  22   0    0.60    0.72
  -4  22   0    0.60    0.76
  -5 -22   0   -0.43    0.47
   5 -22   0   -0.82    0.62
   5 -22   0   -0.74    0.57
   5 -22   0   -1.43    0.61
  -5 -22   0    0.46    0.71
  -5  22   0   -0.66    0.73
   5  22   0   -0.16    0.58
   5  22   0   -0.23    0.74
  -5  22   0   -0.62    0.55
   5  22   0   -0.08    0.57
   6 -22   0   -0.01    0.69
   6 -22   0    0.19    0.61
   6 -22   0   -0.42    0.63
  -6 -22   0   -0.79    0.48
  -6  22   0    0.50    0.58
   6  22   0   -0.14    0.61
   6  22   0    0.00    0.62
   6  22   0    0.64    0.82
  -6  22   0    0.34    0.90
   7 -22   0   18.24    1.49
   7 -22   0   19.45    1.49
   7 -22   0   19.12    1.45
   7  22   0   21.69    1.47
   7  22   0   17.62    1.68
  -7  22   0   19.59    1.86
  -7  22   0   15.89    1.30
   7  22   0   16.80    1.44
   8 -22   0   -0.39    0.74
   8 -22   0    1.28    0.75
   8 -22   0    0.99    0.75
   8  22   0    1.64    0.75
  -8  22   0    0.14    0.99
   8  22   0    1.34    0.71
   8  22   0    1.02    0.92
  -8  22   0    0.20    0.60
  -8  22   0    1.64    0.74
   9 -22   0    2.88    0.88
   9 -22   0    4.79    0.94
   9 -22   0    3.04    0.81
   9  22   0    3.21    0.86
  -9  22   0    3.49    0.84
  -9  22   0    5.62    1.29
   9  22   0    3.15    0.88
  10 -22   0   -0.07    1.05
  10 -22   0   -0.29    0.81
  10 -22   0   -0.30    0.74
  10  22   0    0.40    0.78
  10  22   0   -0.81    0.78
 -10  22   0   -1.50    0.72
 -10  22   0   -1.03    1.06
  11 -22   0   -0.06    0.80
  11 -22   0    0.93    0.85
  11  22   0   -0.13    0.86
  11  22   0   -0.37    0.84
 -11  22   0   -0.10    0.86
 -11  22   0    1.13    1.25
  12 -22   0   -1.06    0.85
  12 -22   0    0.56    0.91
  12  22   0    0.26    1.01
  12  22   0    0.56    0.90
 -12  22   0   -0.82    1.40
  12  22   0   -0.05    0.88
 -12  22   0    1.17    0.96
  13 -22   0    1.98    1.01
  13 -22   0    1.28    1.03
  13  22   0   -0.58    0.93
  13  22   0    1.33    1.00
  13  22   0   -1.85    1.03
  14 -22   0   -0.37    0.98
  14  22   0   -0.74    0.97
  14  22   0    1.31    1.05
  15 -22   0    2.43    1.18
  15  22   0    1.27    1.18
  15  22   0    1.04    1.04
   0 -23   0    0.02    0.66
   0 -23   0   -0.55    0.61
   0 -23   0   -0.29    0.53
   0  23   0   -0.49    0.56
   0  23   0   -0.57    0.62
   0  23   0    0.32    0.55
   0  23   0    0.02    0.58
   1 -23   0   12.34    1.03
  -1 -23   0   12.58    1.13
   1 -23   0   13.36    1.22
  -1 -23   0   15.01    1.26
  -1 -23   0   14.48    1.05
   1 -23   0   12.11    1.10
  -1  23   0    9.44    1.15
  -1  23   0   14.71    1.14
   1  23   0   13.09    1.12
  -1  23   0   11.88    1.08
   1  23   0   12.08    1.29
  -1  23   0    9.66    1.22
   1  23   0   10.91    1.06
   1  23   0   13.92    1.17
   2 -23   0    7.82    0.94
  -2 -23   0   11.37    1.10
   2 -23   0    9.77    0.93
  -2 -23   0    9.26    0.85
   2 -23   0    9.85    1.08
  -2  23   0    8.56    0.91
   2  23   0    8.34    0.94
   2  23   0    9.59    0.92
  -2  23   0    9.49    0.91
  -2  23   0    9.06    1.14
   2  23   0    7.09    0.90
   2  23   0    7.40    1.12
  -3 -23   0   16.64    1.38
   3 -23   0   16.91    1.36
  -3 -23   0   15.36    1.07
   3 -23   0   14.82    1.25
   3 -23   0   14.86    1.18
  -3  23   0   11.93    1.37
   3  23   0   15.79    1.20
  -3  23   0   15.85    1.24
   3  23   0   13.63    1.19
  -3  23   0   12.23    1.11
   3  23   0   13.15    1.39
  -4 -23   0    1.49    0.54
   4 -23   0    0.85    0.67
   4 -23   0    1.48    0.63
  -4 -23   0    0.36    0.69
   4 -23   0    1.53    0.69
   4  23   0    1.10    0.62
   4  23   0    1.36    0.81
   4  23   0    1.00    0.63
  -4  23   0    0.09    0.78
  -4  23   0    0.67    0.60
   5 -23   0    0.24    0.60
   5 -23   0   -0.20    0.68
   5 -23   0    0.12    0.66
  -5 -23   0   -0.03    0.50
  -5  23   0    0.20    0.59
   5  23   0   -0.56    0.61
   5  23   0   -0.42    0.79
   5  23   0    0.13    0.61
  -5  23   0   -0.39    0.80
   6 -23   0    1.64    0.74
   6 -23   0    0.43    0.77
   6 -23   0    0.27    0.65
  -6 -23   0    1.61    0.56
   6  23   0    1.13    0.70
   6  23   0    1.79    0.71
   6  23   0    1.07    0.89
  -6  23   0    1.06    0.64
  -6  23   0    1.56    1.01
   7 -23   0    1.55    0.83
   7 -23   0    1.61    0.73
   7 -23   0    1.38    0.76
  -7  23   0    1.39    0.65
   7  23   0    2.42    0.75
   7  23   0    1.23    0.95
  -7  23   0    1.88    1.04
   7  23   0    1.21    0.73
   8 -23   0   -0.56    0.75
   8 -23   0    0.00    0.70
   8 -23   0    0.29    0.79
  -8  23   0    0.11    0.70
  -8  23   0    1.09    1.01
   8  23   0    1.75    0.98
   8  23   0    0.40    0.72
   8  23   0    0.81    0.72
   9 -23   0    0.11    0.80
   9 -23   0   -0.58    0.70
   9 -23   0    0.75    0.83
  -9  23   0    0.75    1.11
  -9  23   0   -0.25    0.74
   9  23   0    1.19    0.81
   9  23   0    1.13    0.81
  10 -23   0    0.64    1.15
  10 -23   0   -0.23    0.80
  10 -23   0    0.70    0.83
  10  23   0    0.27    0.82
 -10  23   0   -0.03    1.16
  10  23   0    0.55    0.86
 -10  23   0    1.45    0.87
  11 -23   0   30.31    2.17
  11 -23   0   27.29    2.11
 -11  23   0   31.17    2.64
 -11  23   0   32.56    2.15
  11  23   0   26.36    2.07
  11  23   0   29.69    2.13
  12 -23   0   -1.86    0.86
  12 -23   0   -0.56    0.93
  12  23   0    0.85    1.08
  12  23   0   -1.38    0.89
 -12  23   0    0.34    0.96
 -12  23   0   -1.08    1.36
  12  23   0    0.37    0.93
  13 -23   0   27.91    2.18
  13 -23   0   22.72    2.32
  13  23   0   31.58    2.29
  13  23   0   29.65    2.15
  14 -23   0    0.59    1.03
  14  23   0    0.27    1.09
  14  23   0    1.09    1.03
  15 -23   0    3.33    1.24
  15  23   0    1.18    1.13
   0 -24   0    7.75    1.05
   0 -24   0    7.92    0.94
   0 -24   0    7.39    0.87
   0  24   0    4.55    0.98
   0  24   0    8.17    0.91
   0  24   0    7.25    0.86
   1 -24   0   30.10    1.78
   1 -24   0   30.55    1.91
   1 -24   0   32.11    1.96
  -1 -24   0   30.57    2.00
  -1 -24   0   32.32    1.78
  -1  24   0   30.48    2.08
   1  24   0   24.85    2.01
  -1  24   0   24.86    1.96
  -1  24   0   32.14    1.85
   1  24   0   28.79    1.84
   1  24   0   29.61    1.87
   1  24   0   28.95    1.82
  -1  24   0   33.38    1.84
   2 -24   0    0.96    0.68
  -2 -24   0    0.56    0.76
   2 -24   0    0.54    0.76
  -2 -24   0    0.43    0.58
   2 -24   0    0.45    0.60
  -2  24   0   -0.27    0.80
   2  24   0    0.48    0.65
   2  24   0    0.54    0.69
   2  24   0    0.37    0.61
  -2  24   0    0.18    0.61
   2  24   0    0.51    0.76
  -2  24   0    0.96    0.65
  -2  24   0    0.18    0.81
   3 -24   0   12.87    1.11
  -3 -24   0   12.65    1.05
   3 -24   0   12.68    1.17
   3 -24   0   14.91    1.26
  -3 -24   0   14.39    1.30
  -3  24   0   12.16    1.42
  -3  24   0   13.42    1.13
   3  24   0   12.73    1.15
  -3  24   0   11.78    1.09
   3  24   0   11.39    1.36
   3  24   0   11.86    1.07
   4 -24   0    0.19    0.59
  -4 -24   0    1.33    0.57
  -4 -24   0    0.36    0.90
   4 -24   0    0.85    0.74
   4 -24   0   -0.11    0.67
  -4  24   0    0.62    0.64
   4  24   0    1.04    0.67
   4  24   0    1.35    0.82
  -4  24   0    0.57    0.83
   4  24   0    1.08    0.66
  -5 -24   0    1.28    0.59
   5 -24   0    0.99    0.66
   5 -24   0    1.07    0.75
   5 -24   0    1.89    0.80
   5  24   0    0.77    0.67
  -5  24   0    0.62    0.65
  -5  24   0    1.64    0.92
   5  24   0    3.16    1.01
   5  24   0    1.17    0.68
   6 -24   0    1.38    0.82
   6 -24   0    2.02    0.76
  -6 -24   0    2.59    0.86
   6 -24   0    2.75    0.90
   6  24   0    1.66    1.00
   6  24   0    3.66    0.80
  -6  24   0    3.07    1.11
   6  24   0    1.86    0.73
  -6  24   0    2.65    0.74
   7 -24   0    1.93    0.77
   7 -24   0    1.91    0.87
   7 -24   0    1.83    0.85
  -7  24   0    0.89    1.07
   7  24   0    2.85    0.82
   7  24   0    2.54    1.05
   7  24   0    4.03    0.85
  -7  24   0    1.72    0.73
   8 -24   0    3.74    0.97
   8 -24   0    4.27    0.87
   8 -24   0    3.99    0.93
   8  24   0    5.04    0.91
   8  24   0    4.06    0.91
  -8  24   0    4.32    1.27
  -8  24   0    3.66    0.87
   8  24   0    5.52    1.33
   9 -24   0    1.10    0.90
   9 -24   0    0.06    0.79
   9 -24   0   -0.52    0.82
   9  24   0    0.82    0.84
   9  24   0    0.10    0.81
  -9  24   0    0.42    1.14
  -9  24   0    0.44    0.77
  10 -24   0   -0.77    0.89
  10 -24   0    0.57    1.10
  10 -24   0   -2.25    0.78
 -10  24   0   -2.42    1.22
  10  24   0   -0.97    0.85
 -10  24   0   -0.92    0.84
  10  24   0   -0.50    0.87
  11 -24   0   -0.51    0.85
  11 -24   0    0.86    0.95
  11  24   0    0.62    0.97
 -11  24   0    3.90    1.41
  11  24   0    1.36    0.98
 -11  24   0    1.03    0.93
  12 -24   0   -0.21    0.89
  12 -24   0    0.52    0.98
 -12  24   0    1.37    1.51
 -12  24   0    1.71    1.03
  12  24   0   -0.25    0.98
  12  24   0   -0.67    1.02
  12  24   0   -1.21    1.06
  13 -24   0   11.17    1.46
  13  24   0   10.27    1.44
  13  24   0   11.86    1.49
  14 -24   0    0.05    1.04
  14  24   0    1.63    1.11
  14  24   0    0.03    1.12
   0 -25   0   -0.56    0.73
   0 -25   0   -0.30    0.67
   0 -25   0   -1.05    0.55
   0  25   0    0.01    0.64
   0  25   0   -0.16    0.64
   1 -25   0    3.25    0.79
   1 -25   0    3.10    0.70
  -1 -25   0    4.37    0.73
  -1 -25   0    4.49    0.91
   1 -25   0    4.16    0.91
  -1  25   0    3.50    0.73
   1  25   0    2.57    0.77
   1  25   0    3.33    0.72
  -1  25   0    2.54    0.90
  -1  25   0    3.79    0.78
   1  25   0    3.23    0.74
   2 -25   0   10.06    1.14
  -2 -25   0    9.17    0.93
   2 -25   0   10.25    1.07
  -2 -25   0   10.58    1.17
   2 -25   0    9.16    0.95
  -2  25   0    7.03    1.14
  -2  25   0   10.43    1.02
   2  25   0    9.27    0.97
   2  25   0    7.13    0.96
  -2  25   0    9.70    1.00
   3 -25   0    0.48    0.75
   3 -25   0    1.56    0.66
   3 -25   0    0.83    0.72
  -3 -25   0    1.44    0.85
  -3 -25   0    2.03    0.64
  -3  25   0    0.70    0.85
  -3  25   0    0.99    0.68
   3  25   0    1.28    0.67
  -3  25   0    0.20    0.66
   3  25   0    0.00    0.64
   4 -25   0   -0.12    0.78
   4 -25   0   -1.39    0.68
   4 -25   0    0.66    0.69
  -4 -25   0   -0.42    0.59
  -4  25   0    2.27    0.96
   4  25   0   -0.16    0.68
  -4  25   0   -0.38    0.65
   4  25   0    0.01    0.64
   5 -25   0    0.43    0.67
   5 -25   0    0.97    0.79
   5 -25   0   -0.29    0.74
  -5 -25   0    0.33    0.61
  -5  25   0    0.25    0.67
   5  25   0   -0.29    0.68
   5  25   0    0.81    0.68
  -5  25   0   -0.12    0.91
   6 -25   0    0.50    0.81
   6 -25   0   -0.45    0.69
   6 -25   0   -0.92    0.72
   6  25   0    0.32    0.70
   6  25   0    1.48    0.76
  -6  25   0   -0.51    0.67
  -6  25   0    1.28    1.04
   7 -25   0   -0.36    0.85
   7 -25   0    0.26    0.74
   7 -25   0   -1.29    0.76
   7  25   0   -0.21    0.74
   7  25   0    1.27    0.79
  -7  25   0   -0.13    1.00
   8 -25   0   -0.98    0.84
   8 -25   0    0.16    0.78
   8 -25   0   -1.22    0.81
   8  25   0   -0.48    0.77
  -8  25   0   -0.16    0.76
   8  25   0   -0.85    0.80
  -8  25   0    0.66    1.10
   9 -25   0    9.03    1.23
   9 -25   0   10.01    1.28
  -9  25   0   12.77    1.84
   9  25   0   10.69    1.25
  -9  25   0   11.93    1.26
   9  25   0    8.69    1.22
  10 -25   0    1.37    0.99
  10 -25   0    2.98    1.01
  10  25   0    3.70    1.02
  10  25   0    3.39    1.03
 -10  25   0    2.65    1.43
 -10  25   0    2.46    1.01
  11 -25   0    2.08    1.05
  11 -25   0    1.10    0.96
 -11  25   0    4.71    1.48
  11  25   0    1.44    1.01
  11  25   0    0.43    0.98
 -11  25   0    0.92    0.99
  12 -25   0    9.97    1.37
  12  25   0    7.43    1.33
 -12  25   0   11.14    1.38
 -12  25   0   13.16    2.10
  12  25   0    8.52    1.37
  13 -25   0    3.67    1.18
  13  25   0    1.81    1.16
  13  25   0    0.89    1.06
  14 -25   0   -1.45    1.02
  14  25   0    2.44    1.16
   0 -26   0    6.64    0.85
   0 -26   0    7.89    1.09
   0 -26   0    7.79    1.00
   0  26   0    6.60    0.91
   0  26   0    6.27    0.94
   1 -26   0   -0.05    0.61
  -1 -26   0   -0.62    0.75
   1 -26   0   -0.41    0.77
   1 -26   0    0.05    0.72
  -1 -26   0   -0.30    0.60
  -1  26   0   -0.83    0.81
   1  26   0   -0.88    0.63
   1  26   0   -1.43    0.62
   1  26   0   -0.71    0.73
  -1  26   0    0.19    0.67
  -1  26   0    0.04    0.66
  -2 -26   0    4.21    0.76
   2 -26   0    5.02    0.82
   2 -26   0    4.28    0.96
  -2 -26   0    4.54    1.00
   2 -26   0    5.27    0.92
  -2  26   0    4.55    0.83
  -2  26   0    3.38    1.01
   2  26   0    4.41    0.84
   2  26   0    4.84    0.86
  -2  26   0    5.81    0.89
   3 -26   0   -0.36    0.75
   3 -26   0    0.23    0.70
   3 -26   0    0.71    0.85
  -3 -26   0    1.58    0.67
  -3  26   0    1.00    0.73
   3  26   0    0.36    0.72
  -3  26   0    1.80    0.93
   3  26   0    1.15    0.73
  -3  26   0    0.42    0.72
   4 -26   0    1.34    0.79
   4 -26   0    2.07    0.76
  -4 -26   0    3.41    0.70
   4 -26   0    0.94    0.87
  -4  26   0    1.17    0.94
   4  26   0    1.77    0.72
  -4  26   0    0.85    0.72
   4  26   0    1.42    0.74
   5 -26   0   -0.45    0.71
  -5 -26   0    0.08    0.73
   5 -26   0    1.50    0.84
   5 -26   0   -0.07    0.82
  -5  26   0   -1.57    0.66
   5  26   0   -0.91    0.70
   5  26   0    0.37    0.76
  -5  26   0   -0.30    0.98
   6 -26   0    1.75    0.94
   6 -26   0    1.90    0.80
   6 -26   0    2.27    1.05
  -6  26   0    3.40    1.22
   6  26   0    3.78    0.90
   6  26   0    2.43    0.85
   7 -26   0   10.42    1.19
   7 -26   0    9.45    1.25
   7  26   0    8.72    1.14
  -7  26   0    9.56    1.54
   7  26   0    8.68    1.13
   8 -26   0    2.83    1.07
   8 -26   0    1.32    0.91
   8  26   0    2.06    0.92
  -8  26   0    1.58    1.29
  -8  26   0    1.78    0.92
   8  26   0    2.13    0.93
   9 -26   0    3.10    0.97
   9 -26   0    5.41    1.12
  -9  26   0    5.30    1.06
   9  26   0    1.62    0.94
   9  26   0    2.69    1.01
  -9  26   0    1.87    1.35
  10 -26   0    0.34    0.96
  10 -26   0    1.14    1.00
  10  26   0    2.28    0.98
 -10  26   0    1.39    0.94
 -10  26   0    1.47    1.45
  10  26   0    2.28    0.98
  11 -26   0   -1.24    1.00
  11 -26   0    0.17    0.94
 -11  26   0    0.47    0.97
 -11  26   0   -0.47    1.29
  11  26   0    0.27    0.95
  11  26   0    0.90    0.99
  12 -26   0    1.01    1.03
  12  26   0   -1.21    1.05
 -12  26   0    1.57    1.60
 -12  26   0    2.15    1.06
  12  26   0   -0.90    0.99
  13 -26   0    1.73    1.08
  13  26   0    0.85    1.13
 -13  26   0    2.59    2.17
  13  26   0   -0.03    1.04
   0 -27   0   -0.20    0.65
   0 -27   0   -0.93    0.83
   0  27   0   -1.12    0.73
   0  27   0    0.27    0.72
   0  27   0    1.36    0.91
   1 -27   0   -0.80    0.64
  -1 -27   0   -0.18    0.63
   1 -27   0   -1.60    0.76
  -1 -27   0   -1.17    0.78
   1  27   0    0.83    0.71
   1  27   0    0.52    0.73
  -1  27   0    0.75    0.74
  -1  27   0   -0.14    0.69
  -1  27   0    0.93    0.91
  -2 -27   0    1.04    0.70
   2 -27   0   -0.62    0.65
   2 -27   0    1.10    0.85
   2  27   0    0.83    0.72
  -2  27   0   -0.11    0.74
  -2  27   0    1.39    0.92
  -2  27   0   -0.14    0.72
   2  27   0    1.93    0.77
  -3 -27   0    2.06    0.70
   3 -27   0    1.17    0.91
   3 -27   0    2.00    0.77
  -3  27   0    0.98    0.75
  -3  27   0    2.66    1.01
   3  27   0    2.08    0.81
   3  27   0    1.62    0.80
   4 -27   0   -0.94    0.67
  -4 -27   0   -0.02    0.66
   4 -27   0   -0.30    0.84
   4  27   0   -0.53    0.73
   4  27   0    0.41    0.72
  -4  27   0   -0.48    0.74
  -4  27   0   -1.00    0.94
   5 -27   0    0.74    0.78
   5 -27   0    1.11    0.92
   5  27   0    2.51    0.87
   5  27   0    1.72    0.82
  -5  27   0    0.96    1.07
   6 -27   0    5.89    1.01
   6 -27   0    8.60    1.22
   6  27   0    7.69    1.07
  -6  27   0    6.90    1.46
   6  27   0    7.70    1.08
   7 -27   0    0.07    0.91
   7 -27   0    0.16    0.79
   7  27   0    0.65    0.87
  -7  27   0    0.74    1.20
   7  27   0   -0.41    0.77
   8 -27   0   -0.03    0.97
   8 -27   0    1.37    0.90
   8  27   0    1.56    0.92
  -8  27   0   -0.83    0.80
   8  27   0    0.66    0.87
  -8  27   0    2.52    1.35
   9 -27   0   -0.35    0.98
   9 -27   0    0.89    0.93
  -9  27   0   -1.47    1.22
   9  27   0    1.70    0.95
  -9  27   0    1.89    0.91
   9  27   0    0.33    0.96
  10 -27   0    0.86    1.00
  10 -27   0    1.72    1.03
 -10  27   0    4.36    1.59
  10  27   0    0.55    0.96
 -10  27   0    4.11    1.10
  10  27   0    2.36    1.07
  11 -27   0    4.53    1.17
 -11  27   0    5.12    1.22
  11  27   0    4.90    1.22
  11  27   0    4.19    1.15
 -11  27   0    7.44    1.75
  12 -27   0    1.72    1.07
 -12  27   0    0.19    1.10
 -12  27   0    1.78    1.62
  12  27   0   -0.14    0.97
  12  27   0    0.80    1.10
   0 -28   0    4.17    1.07
   0 -28   0    3.94    0.85
   0  28   0    3.47    0.85
   0  28   0    4.38    1.11
   0  28   0    3.93    1.01
  -1 -28   0    4.91    0.84
   1 -28   0    4.16    0.85
   1 -28   0    3.21    1.05
   1  28   0    5.12    0.93
  -1  28   0    5.69    0.95
  -1  28   0    3.55    0.92
  -1  28   0    2.29    1.03
  -2 -28   0    5.72    0.87
   2 -28   0    4.34    0.89
   2 -28   0    5.47    1.10
   2  28   0    4.88    0.94
   2  28   0    3.69    0.85
  -2  28   0    4.84    1.17
  -2  28   0    5.13    0.96
  -2  28   0    3.85    0.92
  -3 -28   0   -0.39    0.67
   3 -28   0    0.36    0.76
   3 -28   0   -1.45    0.84
  -3  28   0    1.10    0.96
  -3  28   0   -1.03    0.75
   3  28   0   -0.63    0.73
   3  28   0    1.01    0.78
   4 -28   0   -0.29    0.94
   4 -28   0    0.95    0.78
  -4 -28   0   -0.01    0.87
  -4  28   0    0.32    1.02
   4  28   0   -0.44    0.81
   4  28   0   -0.55    0.74
   5 -28   0   10.45    1.22
   5 -28   0   11.00    1.39
   5  28   0   11.97    1.28
  -5  28   0   10.96    1.59
   5  28   0   12.93    1.28
   6 -28   0    0.64    0.85
   6 -28   0   -0.62    0.93
  -6  28   0    2.36    1.26
   6  28   0    0.85    0.94
   6  28   0    0.90    0.84
   7 -28   0    3.77    1.00
   7 -28   0    4.09    1.13
   7  28   0    4.87    1.01
   7  28   0    3.80    1.03
  -7  28   0    3.31    1.45
   8 -28   0    0.14    1.01
   8 -28   0    0.75    0.94
   8  28   0    1.99    0.93
  -8  28   0    1.92    0.96
   8  28   0    0.18    0.94
  -8  28   0   -1.15    1.39
   9 -28   0    5.89    1.18
   9  28   0    4.38    1.07
  -9  28   0    6.34    1.14
  -9  28   0    6.33    1.62
   9  28   0    4.75    1.13
  10 -28   0   -1.14    1.12
  10 -28   0   -1.05    0.97
 -10  28   0    0.15    0.98
 -10  28   0    0.08    1.42
  10  28   0    1.03    1.05
  10  28   0   -1.84    0.89
  11 -28   0    2.39    1.10
 -11  28   0    2.12    1.50
  11  28   0   -0.72    1.05
 -11  28   0    0.99    1.05
  11  28   0   -0.49    1.01
  12 -28   0    5.29    1.29
  12  28   0    6.12    1.31
 -12  28   0    4.16    1.80
 -12  28   0    7.88    1.92
   0 -29   0   -0.39    0.71
   0  29   0    0.62    0.81
   0  29   0    0.32    0.92
  -1 -29   0    1.12    0.73
   1 -29   0   -0.40    0.95
   1 -29   0   -1.10    0.73
  -1  29   0   -0.65    0.83
   1  29   0   -1.17    0.79
  -1  29   0   -0.12    0.92
  -1  29   0   -1.08    0.79
   2 -29   0   -1.90    0.87
  -2 -29   0   -0.48    0.70
   2 -29   0   -1.05    0.75
   2  29   0   -0.93    0.76
   2  29   0    0.45    0.79
  -2  29   0    1.40    1.06
  -2  29   0   -0.51    0.80
   3 -29   0   10.94    1.19
  -3 -29   0   13.97    1.17
   3 -29   0   11.86    1.42
   3  29   0   12.76    1.28
   3  29   0    8.50    1.16
  -3  29   0   11.32    1.58
   4 -29   0    5.89    1.02
   4 -29   0    6.25    1.22
   4  29   0    6.27    1.02
   4  29   0    7.59    1.11
  -4  29   0    7.10    1.43
   5 -29   0   10.90    1.40
   5 -29   0   11.82    1.26
   5  29   0   11.95    1.24
   5  29   0    8.76    1.18
  -5  29   0   10.22    1.67
   6 -29   0    2.01    0.97
   6 -29   0    1.52    1.10
   6  29   0    1.94    0.89
  -6  29   0    0.68    1.36
   6  29   0    4.04    1.05
   7 -29   0   -1.09    0.98
   7 -29   0    0.97    0.93
   7  29   0    0.52    0.87
   7  29   0    0.62    1.00
  -7  29   0    2.30    1.41
   8 -29   0   -0.91    0.98
   8 -29   0    1.46    0.96
  -8  29   0    0.47    0.88
   8  29   0    0.33    0.92
   8  29   0    3.55    1.04
  -8  29   0    2.42    1.37
   9 -29   0   -0.52    0.99
   9 -29   0   -0.53    1.06
  -9  29   0    0.39    0.93
   9  29   0   -0.33    0.92
   9  29   0   -1.80    0.97
  -9  29   0    0.50    1.43
  10 -29   0    5.59    1.30
 -10  29   0    9.87    1.87
  10  29   0    8.70    1.28
 -10  29   0    5.68    1.22
  10  29   0    7.05    1.32
  11 -29   0    0.81    1.08
  11  29   0   -1.15    0.97
 -11  29   0    3.09    1.57
 -11  29   0    0.40    1.06
   0 -30   0   24.93    1.76
   0  30   0   28.39    1.85
   0  30   0   20.51    2.11
   1 -30   0    9.27    1.14
  -1 -30   0    8.22    1.11
  -1  30   0   10.70    1.16
   1  30   0   10.52    1.18
  -1  30   0    5.75    1.31
   2 -30   0    0.73    0.87
   2 -30   0   -1.22    0.98
  -2 -30   0    2.40    0.86
  -2  30   0   -0.97    1.08
   2  30   0    2.79    0.96
  -2  30   0    2.66    0.94
   2  30   0    1.78    0.89
   3 -30   0    4.11    0.96
  -3 -30   0    5.78    1.23
   3 -30   0    3.33    1.16
   3  30   0    4.68    0.99
  -3  30   0    2.96    1.33
   3  30   0    3.82    0.93
   4 -30   0    4.84    1.22
   4 -30   0    7.67    1.11
   4  30   0    5.70    1.07
  -4  30   0    6.80    1.44
   4  30   0    5.06    0.99
   5 -30   0   10.54    1.29
   5 -30   0   10.40    1.44
  -5  30   0    9.72    1.64
   5  30   0    7.29    1.15
   5  30   0   10.59    1.28
   6 -30   0    1.79    0.98
   6 -30   0    0.67    1.09
  -6  30   0    0.73    1.35
   6  30   0    1.87    0.94
   6  30   0    2.64    1.05
   7 -30   0    0.91    1.05
   7 -30   0    0.67    0.98
  -7  30   0    0.79    1.43
   7  30   0    0.12    0.91
   7  30   0    0.94    1.02
   8 -30   0    2.23    1.06
   8 -30   0   -0.61    1.02
   8  30   0   -0.61    1.01
  -8  30   0    0.04    1.35
   8  30   0    0.91    0.95
  -8  30   0   -0.75    0.93
   9 -30   0    0.42    1.02
  -9  30   0   -0.37    0.98
  -9  30   0    2.89    1.57
   9  30   0    0.26    0.98
   9  30   0    0.30    1.04
  10 -30   0    5.55    1.29
 -10  30   0    7.66    1.89
  10  30   0    5.52    1.25
  10  30   0    7.39    1.75
 -10  30   0    7.18    1.29
   0 -31   0    0.77    0.84
   0  31   0    0.65    1.10
   0  31   0   -0.17    0.86
   1 -31   0    0.44    0.82
  -1 -31   0    0.20    0.82
   1  31   0   -0.76    0.97
  -1  31   0   -0.11    0.92
  -1  31   0    0.14    1.01
   1  31   0    0.03    0.85
  -2 -31   0    2.61    0.86
   2 -31   0    0.60    0.86
   2  31   0   -1.58    0.85
  -2  31   0    1.95    1.19
  -2  31   0   -0.68    0.90
   3 -31   0    1.44    1.19
   3 -31   0   -0.75    0.84
  -3  31   0    0.94    1.13
   3  31   0    0.05    0.88
   3  31   0    0.57    0.83
   4 -31   0    1.30    0.91
   4 -31   0    2.18    1.11
   4  31   0    1.62    0.90
  -4  31   0    3.45    1.33
   4  31   0    2.14    0.99
   5 -31   0    4.72    1.12
   5 -31   0    3.51    1.23
  -5  31   0    5.59    1.50
   5  31   0    4.16    1.11
   5  31   0    3.23    0.98
   6 -31   0    6.26    1.21
   6 -31   0    3.61    1.26
  -6  31   0    3.02    1.59
   6  31   0    5.86    1.09
   6  31   0    7.02    1.15
   7 -31   0    0.11    1.15
   7 -31   0    0.76    1.01
   7  31   0    0.38    1.00
  -7  31   0   -0.55    1.38
   7  31   0    1.26    0.93
   8 -31   0   -0.32    1.03
   8  31   0    0.36    1.11
   8  31   0    0.32    0.97
  -8  31   0   -0.58    0.94
  -8  31   0    2.03    1.49
   9 -31   0   -1.05    1.05
   9  31   0   -0.06    0.96
  -9  31   0    1.20    1.53
  -9  31   0   -0.93    1.01
   9  31   0    0.66    1.35
   0 -32   0    0.91    0.89
   0  32   0    0.29    0.95
   0  32   0    0.56    1.16
   1 -32   0    1.31    0.92
  -1 -32   0    1.83    0.90
   1  32   0    3.04    0.97
   1  32   0    0.89    1.12
  -1  32   0    1.35    1.20
  -1  32   0    1.45    0.96
   2 -32   0    1.00    0.88
  -2  32   0   -0.24    0.96
  -2  32   0    0.98    1.18
   2  32   0   -0.75    0.91
   3 -32   0   -0.18    0.88
  -3  32   0   -1.17    1.15
   3  32   0    0.75    0.89
   3  32   0    0.84    0.96
   4 -32   0    1.40    0.99
   4  32   0    4.14    1.06
   4  32   0    2.43    0.95
  -4  32   0    2.68    1.34
   5 -32   0    7.15    1.46
   5 -32   0    8.01    1.28
   5  32   0    6.28    1.15
   5  32   0    6.50    1.19
  -5  32   0    8.45    1.59
   6 -32   0    2.62    1.31
   6 -32   0    5.46    1.20
   6  32   0    2.99    1.07
  -6  32   0    3.05    1.52
   6  32   0    4.85    1.20
   7 -32   0    7.93    1.35
  -7  32   0   11.29    1.93
   7  32   0    6.83    1.28
   7  32   0    4.98    1.19
   8 -32   0    1.95    1.11
  -8  32   0    1.33    1.04
   8  32   0    1.76    1.72
   8  32   0    0.85    1.00
  -8  32   0    3.84    1.61
   0 -33   0   -0.82    0.89
   0  33   0   -0.12    1.18
   0  33   0   -1.11    0.93
   1 -33   0    4.74    1.07
  -1  33   0   -0.98    1.19
   1  33   0    0.81    1.17
  -1  33   0    1.81    1.02
   1  33   0    1.83    0.98
   2 -33   0    1.73    0.99
   2  33   0    1.78    1.02
  -2  33   0    2.05    1.32
   2  33   0    0.60    1.14
   3 -33   0   -0.04    0.96
   3  33   0   -1.96    0.95
  -3  33   0    0.17    1.27
   4 -33   0    3.12    1.11
   4  33   0    4.40    1.15
   4  33   0    2.79    1.00
  -4  33   0    5.52    1.54
   5 -33   0    2.06    1.10
   5  33   0    2.21    1.11
   5  33   0    1.37    0.97
  -5  33   0    2.92    1.46
   6 -33   0    1.90    1.09
   6  33   0    3.51    1.12
   6  33   0    0.44    1.09
  -6  33   0    4.86    1.63
   7 -33   0    1.03    1.08
   0 -34   0    7.91    1.46
   0  34   0    2.95    1.19
   0  34   0    5.95    1.47
   1 -34   0   -0.51    1.01
  -1  34   0   -0.77    1.27
   1  34   0   -0.53    1.25
   1  34   0    0.36    1.05
  -1  34   0   -0.51    1.02
   2 -34   0   -0.29    0.97
  -2  34   0    0.28    1.22
   2  34   0   -0.68    0.97
   2  34   0   -0.83    1.13
   3 -34   0    2.40    1.07
  -3  34   0    1.64    1.32
   3  34   0   -0.04    1.04
   4 -34   0    0.45    1.05
   4  34   0   -0.17    1.07
   4  34   0    0.48    0.96
  -4  34   0    4.18    1.39
   5 -34   0   -0.51    1.00
   5  34   0    0.26    0.97
  -5  34   0   -1.10    1.35
   0  35   0   -0.52    1.11
   0  35   0   -1.61    1.19
   1 -35   0   -0.98    1.18
   1  35   0   -0.44    1.28
  -1  35   0    0.01    1.31
   1  35   0    1.49    1.12
  -1  35   0   -0.34    1.26
   2 -35   0    1.12    1.08
  20   0  -1   -0.06    1.15
 -20   0   1   -0.81    1.11
 -19   0   1   -0.78    1.10
  19   0  -1    0.83    1.12
 -18   0   1   -1.87    0.92
 -18   0   1   -0.25    1.15
  18   0  -1   -0.35    1.04
  18   0  -1    1.01    1.02
 -17   0   1    0.27    1.07
  17   0  -1    0.42    0.97
  17   0  -1    0.61    0.89
 -17   0   1   -0.77    0.90
  16   0  -1    1.32    0.94
  16   0  -1   -0.05    0.81
 -16   0   1   -0.16    0.90
 -16   0   1   -0.25    0.99
  15   0  -1    1.90    0.84
 -15   0   1    1.89    1.08
  15   0  -1    1.05    0.85
 -15   0   1   -0.29    0.97
 -15   0   1    2.27    0.95
 -14   0   1    1.11    0.90
 -14   0   1    2.48    1.01
 -14   0   1    2.97    0.86
  14   0  -1    2.99    0.75
  14   0  -1    2.31    0.80
  13   0  -1    1.80    0.65
  13   0  -1    1.92    0.70
 -13   0   1    0.04    0.84
 -13   0   1    1.56    0.83
 -13   0   1    2.38    0.77
  12   0  -1    0.27    0.56
 -12   0   1   -0.67    0.64
  12   0  -1    0.61    0.52
 -12   0   1   -1.60    0.67
 -12   0   1    0.64    0.67
  11   0  -1    0.33    0.51
 -11   0   1    0.88    0.63
 -11   0   1    0.14    0.60
 -11   0   1    0.02    0.59
  11   0  -1    0.01    0.47
  11   0  -1    0.60    0.45
 -10   0   1   -0.71    0.46
 -10   0   1    0.52    0.55
  10   0  -1    0.03    0.39
 -10   0   1   -0.23    0.54
  10   0  -1   -0.54    0.43
  10   0  -1    0.18    0.46
  -9   0   1   -0.08    0.49
   9   0  -1    0.06    0.38
   9   0  -1    0.22    0.37
  -9   0   1   -0.99    0.45
   9   0  -1   -0.19    0.30
  -9   0   1    0.15    0.44
   8   0  -1   -0.16    0.33
  -8   0   1   -0.73    0.39
   8   0  -1   -0.42    0.32
   8   0  -1    0.01    0.28
  -8   0   1   -0.04    0.36
  -8   0   1   -0.55    0.38
   7   0  -1   -0.11    0.27
   7   0  -1    0.16    0.25
  -7   0   1   -0.17    0.31
   7   0  -1    0.17    0.29
  -7   0   1   -0.75    0.33
  -6   0   1    0.19    0.35
   6   0  -1   -0.13    0.24
  -6   0   1   -0.06    0.26
   6   0  -1    0.30    0.25
   6   0  -1    0.12    0.21
  -5   0   1    0.17    0.23
   5   0  -1    0.07    0.22
  -5   0   1   -0.28    0.31
   5   0  -1   -0.77    0.22
   5   0  -1    0.24    0.24
   4   0  -1   -0.16    0.16
  -4   0   1   -0.16    0.19
  -4   0   1    0.08    0.26
   4   0  -1   -0.26    0.18
  -3   0   1   -0.08    0.16
   3   0  -1   -0.09    0.15
  -3   0   1   -0.19    0.26
   3   0  -1   -0.46    0.12
  -2   0   1    0.06    0.14
   2   0  -1   -0.02    0.12
   1   0  -1   -0.71    0.09
   1   0  -1   -0.77    0.06
  -1   0   1   -0.68    0.10
   0   0  -1   -0.65    0.04
   0   0   1   -0.61    0.03
   0   0  -1   -0.62    0.06
   0   0  -1   -0.60    0.04
   0   0   1   -0.67    0.04
   0   0   1   -0.64    0.06
   0   0  -1   -0.58    0.03
   0   0  -1   -0.65    0.03
   0   0   1   -0.63    0.06
   1   0   1   -0.62    0.10
   1   0   1   -0.57    0.08
  -1   0  -1   -0.53    0.07
  -1   0  -1   -0.48    0.10
   1   0   1   -0.59    0.08
   1   0   1   -0.52    0.07
  -1   0  -1   -0.55    0.09
  -1   0  -1   -0.39    0.07
  -2   0  -1   -0.04    0.15
  -2   0  -1   -0.44    0.14
   2   0   1   -0.06    0.13
   2   0   1    0.01    0.16
   2   0   1   -0.44    0.14
   2   0   1   -0.31    0.11
  -2   0  -1   -0.18    0.13
  -2   0  -1   -0.03    0.12
  -3   0  -1    0.03    0.20
   3   0   1   -0.25    0.19
   3   0   1   -0.12    0.22
  -3   0  -1    0.00    0.20
   3   0   1   -0.24    0.19
  -3   0  -1   -0.56    0.18
  -4   0  -1   -0.26    0.20
  -4   0  -1   -0.34    0.18
   4   0   1   -0.30    0.22
  -4   0  -1   -0.27    0.22
   4   0   1   -0.04    0.21
   4   0   1   -0.27    0.19
   4   0   1   -0.21    0.22
  -4   0  -1   -0.32    0.19
   5   0   1   -0.07    0.22
   5   0   1   -0.17    0.25
  -5   0  -1   -0.03    0.21
  -5   0  -1    0.08    0.20
   5   0   1   -0.18    0.25
   5   0   1    0.09    0.24
   6   0   1   -0.03    0.27
   6   0   1   -0.46    0.27
   6   0   1   -0.32    0.24
   6   0   1   -0.22    0.27
   6   0   1    0.05    0.29
  -6   0  -1    0.01    0.32
  -6   0  -1   -0.30    0.37
  -6   0  -1   -0.01    0.23
   7   0   1   -0.45    0.33
   7   0   1   -0.25    0.30
  -7   0  -1    0.10    0.37
  -7   0  -1   -0.67    0.43
   7   0   1   -0.37    0.27
  -7   0  -1   -0.21    0.27
   8   0   1   -0.09    0.33
   8   0   1    0.12    0.38
  -8   0  -1   -0.24    0.49
  -8   0  -1    0.05    0.40
   8   0   1   -0.06    0.35
  -8   0  -1    0.14    0.29
   9   0   1    1.17    0.41
   9   0   1    0.36    0.49
  -9   0  -1    0.59    0.37
   9   0   1    1.29    0.45
  -9   0  -1    1.09    0.50
  -9   0  -1   -0.46    0.66
 -10   0  -1    0.32    0.36
  10   0   1   -0.20    0.42
 -10   0  -1    0.85    0.56
 -10   0  -1   -0.82    0.61
 -10   0  -1   -0.26    0.52
  10   0   1    0.31    0.46
 -11   0  -1    0.12    0.64
 -11   0  -1    0.72    0.44
  11   0   1    1.26    0.56
 -11   0  -1    1.49    0.64
 -11   0  -1   -0.12    0.76
  11   0   1    0.79    0.51
  12   0   1   -0.04    0.54
 -12   0  -1   -0.63    0.70
  12   0   1   -0.59    0.56
 -12   0  -1    0.04    0.44
 -12   0  -1   -0.38    0.66
 -12   0  -1   -0.21    0.76
 -13   0  -1    0.86    0.81
  13   0   1   -1.38    0.55
  13   0   1    0.14    0.64
 -13   0  -1   -1.08    0.81
 -13   0  -1   -0.54    0.77
 -14   0  -1   -0.90    0.84
 -14   0  -1    0.91    0.99
  14   0   1    0.62    0.80
  14   0   1    0.64    0.71
 -14   0  -1    1.19    1.10
  15   0   1    1.00    0.86
  15   0   1   -1.11    0.69
 -15   0  -1   -1.07    0.94
  16   0   1    0.15    0.93
 -16   0  -1    0.04    0.95
  16   0   1    1.64    0.90
  17   0   1    1.35    1.01
 -17   0  -1   -0.49    1.04
  17   0   1   -0.08    1.04
 -18   0  -1   -1.05    1.00
  18   0   1   -0.31    1.08
  18   0   1   -0.47    0.99
 -19   0  -1    0.01    1.15
  19   0   1   -0.83    1.07
  20  -1  -1    2.56    1.27
 -20  -1   1    0.64    1.21
  20   1  -1    1.71    1.20
 -20   1   1    0.04    1.17
  19  -1  -1    8.39    1.40
 -19  -1   1    3.93    1.31
 -19   1   1    3.14    1.25
  19   1  -1    6.65    1.41
 -18  -1   1   -0.01    1.03
  18  -1  -1    0.50    0.94
  18  -1  -1   -0.72    1.09
 -18  -1   1    0.61    1.20
 -18   1   1   -0.01    1.02
  18   1  -1    0.45    1.02
  18   1  -1    0.56    1.14
  17  -1  -1    0.62    0.93
 -17  -1   1   -0.57    0.92
 -17  -1   1   -0.52    1.01
  17  -1  -1    1.17    0.96
 -17   1   1    1.16    0.98
  17   1  -1   -0.40    0.85
  17   1  -1    1.20    0.99
 -17   1   1    0.04    1.09
  16  -1  -1    1.16    0.88
 -16  -1   1    1.34    0.96
  16  -1  -1    1.03    0.90
 -16  -1   1    0.98    1.06
 -16   1   1    2.13    1.06
  16   1  -1    1.47    1.03
 -16   1   1    1.79    0.97
  16   1  -1    3.40    0.98
  15  -1  -1   13.07    1.48
 -15  -1   1   16.06    1.70
 -15  -1   1   12.94    1.39
  15  -1  -1   12.40    1.29
 -15  -1   1    9.70    1.48
 -15   1   1   13.13    1.35
 -15   1   1   13.15    1.56
 -15   1   1   10.46    1.48
  15   1  -1   11.77    1.24
  15   1  -1    9.18    1.33
 -14  -1   1   16.72    1.49
 -14  -1   1   14.32    1.64
 -14  -1   1   18.96    1.77
  14  -1  -1   15.00    1.37
  14  -1  -1   17.00    1.40
  14   1  -1   17.06    1.42
 -14   1   1   15.82    1.48
  14   1  -1   14.21    1.41
 -14   1   1   13.84    1.58
 -14   1   1   14.42    1.58
 -13  -1   1   32.97    2.00
  13  -1  -1   28.97    1.97
  13  -1  -1   29.10    1.88
 -13  -1   1   26.70    2.20
 -13  -1   1   31.34    2.12
  13   1  -1   32.23    1.92
 -13   1   1   29.25    1.95
  13   1  -1   33.04    2.01
 -13   1   1   27.74    2.16
 -13   1   1   31.24    2.15
  12  -1  -1    0.24    0.55
 -12  -1   1    0.73    0.73
 -12  -1   1    1.35    0.73
 -12  -1   1    0.23    0.68
  12  -1  -1    0.71    0.53
 -12   1   1   -0.21    0.70
 -12   1   1    0.35    0.67
  12   1  -1    0.71    0.61
 -12   1   1    0.46    0.69
  12   1  -1    1.26    0.54
  11  -1  -1    1.92    0.56
  11  -1  -1    2.38    0.62
  11  -1  -1    2.73    0.55
 -11  -1   1    2.10    0.71
 -11  -1   1    1.93    0.73
 -11  -1   1    1.94    0.68
  11   1  -1    1.92    0.55
 -11   1   1    1.86    0.75
 -11   1   1    1.83    0.65
  11   1  -1    1.95    0.51
 -11   1   1    2.45    0.69
  11   1  -1    2.91    0.63
 -10  -1   1   -0.34    0.50
  10  -1  -1   -0.32    0.39
 -10  -1   1   -0.42    0.54
 -10  -1   1   -0.12    0.53
  10  -1  -1    0.03    0.44
  10  -1  -1   -0.40    0.36
 -10   1   1    0.13    0.50
 -10   1   1    0.43    0.56
  10   1  -1   -0.35    0.41
  10   1  -1   -0.30    0.37
 -10   1   1   -1.09    0.53
  10   1  -1   -0.02    0.44
  -9  -1   1   16.30    1.23
   9  -1  -1   17.79    1.15
  -9  -1   1   15.98    1.33
   9  -1  -1   17.19    1.13
  -9  -1   1   18.28    1.20
   9  -1  -1   16.61    1.06
  -9   1   1   13.76    1.27
   9   1  -1   16.96    1.15
   9   1  -1   17.72    1.07
  -9   1   1   17.41    1.18
   9   1  -1   18.22    1.15
   8  -1  -1    4.73    0.53
  -8  -1   1    4.29    0.58
   8  -1  -1    2.82    0.47
  -8  -1   1    3.66    0.64
  -8  -1   1    4.42    0.63
   8  -1  -1    3.27    0.43
  -8   1   1    4.35    0.57
  -8   1   1    3.52    0.65
   8   1  -1    4.25    0.46
   8   1  -1    4.13    0.52
   8   1  -1    3.07    0.49
  -7  -1   1   19.19    1.25
   7  -1  -1   19.61    1.17
  -7  -1   1   20.31    1.21
  -7  -1   1   21.90    1.36
   7  -1  -1   19.43    1.17
   7  -1  -1   20.14    1.11
  -7   1   1   19.57    1.32
   7   1  -1   19.84    1.17
   7   1  -1   20.00    1.11
  -7   1   1   21.05    1.20
   7   1  -1   19.99    1.17
  -6  -1   1   11.81    0.86
   6  -1  -1   11.53    0.76
   6  -1  -1   12.44    0.77
   6  -1  -1   11.10    0.70
   6  -1  -1   10.98    0.68
  -6  -1   1   12.48    0.81
  -6  -1   1   12.19    0.92
  -6   1   1   12.01    0.90
   6   1  -1   11.44    0.71
   6   1  -1   11.47    0.76
   6   1  -1   11.47    0.77
  -6   1   1   11.91    0.79
  -5  -1   1  276.70   12.60
  -5  -1   1  268.62   12.50
   5  -1  -1  257.87   12.45
   5  -1  -1  266.44   12.42
  -5  -1   1  266.03   12.52
   5  -1  -1  260.55   12.46
   5   1  -1  256.43   12.48
  -5   1   1  275.98   12.58
   5   1  -1  262.81   12.47
  -5   1   1  279.44   12.49
   5   1  -1  262.33   12.46
   5   1  -1  259.60   12.46
   4  -1  -1    8.84    0.54
  -4  -1   1    8.28    0.66
  -4  -1   1    8.69    0.64
  -4  -1   1    9.17    0.66
   4  -1  -1    8.98    0.56
  -4  -1   1    9.33    0.59
  -4   1   1    8.47    0.65
  -4   1   1    9.52    0.59
   4   1  -1    9.16    0.54
   4   1  -1    8.68    0.55
   4   1  -1    8.55    0.55
   4   1  -1    9.27    0.56
  -3  -1   1  633.56   28.60
  -3  -1   1  607.50   28.62
   3  -1  -1  593.22   28.57
   3  -1  -1  623.18   28.57
   3   1  -1  609.50   28.56
   3   1  -1  579.81   28.56
   3   1  -1  630.93   28.57
   3   1  -1  605.21   28.56
  -3   1   1  606.16   28.57
  -3   1   1  655.38   28.60
   2  -1  -1    8.23    0.41
   2  -1  -1    7.85    0.43
  -2  -1   1    7.70    0.50
  -1  -1   1  293.69   13.95
   1  -1  -1  301.21   13.92
  -1   1   1  300.18   13.92
   0  -1   1    0.27    0.04
   0  -1  -1    0.43    0.06
   0  -1  -1    0.01    0.05
   0  -1  -1    0.26    0.07
   0  -1  -1    0.21    0.04
   0   1   1    0.41    0.09
   0   1  -1   -0.01    0.05
   0   1   1    0.28    0.06
   0   1  -1    0.26    0.05
  -1  -1  -1  192.41    8.99
  -1  -1  -1  191.40    8.99
   1  -1   1  193.68    8.99
  -1  -1  -1  192.30    9.01
   1  -1   1  190.50    8.98
  -1  -1  -1  187.80    8.99
   1  -1   1  188.82    8.99
   1  -1   1  185.38    8.99
   1  -1   1  201.57    9.01
   1   1   1  193.44    9.01
   1   1   1  192.22    8.98
  -1   1  -1  190.06    8.99
  -1   1  -1  198.53    8.99
  -1   1  -1  192.30    8.99
   1   1   1  190.79    8.99
  -1   1  -1  196.24    9.01
   1   1   1  190.68    8.99
   1   1   1  192.29    8.99
   2  -1   1   10.94    0.62
   2  -1   1   12.59    0.66
   2  -1   1   11.72    0.63
  -2  -1  -1   11.32    0.65
  -2  -1  -1   11.01    0.63
   2  -1   1   10.73    0.62
  -2  -1  -1   11.00    0.62
  -2  -1  -1   11.09    0.64
  -2   1  -1   11.02    0.65
   2   1   1   11.34    0.64
  -2   1  -1   11.56    0.63
   2   1   1   10.87    0.65
   2   1   1   11.88    0.63
   2   1   1   11.14    0.63
  -2   1  -1   11.68    0.63
  -2   1  -1   11.65    0.63
   3  -1   1  263.48   11.75
  -3  -1  -1  246.39   11.71
   3  -1   1  245.38   11.72
  -3  -1  -1  251.04   11.73
  -3  -1  -1  244.28   11.74
   3  -1   1  246.02   11.73
   3   1   1  249.30   11.73
   3   1   1  253.62   11.74
  -3   1  -1  247.08   11.71
  -3   1  -1  254.21   11.75
   3   1   1  256.92   11.75
   4  -1   1   20.51    1.08
   4  -1   1   19.61    1.07
  -4  -1  -1   19.11    1.06
   4  -1   1   19.75    1.06
   4  -1   1   20.12    1.06
  -4  -1  -1   20.36    1.05
  -4  -1  -1   20.48    1.08
  -4  -1  -1   18.96    1.04
  -4   1  -1   17.91    1.05
   4   1   1   19.57    1.06
   4   1   1   19.92    1.07
   4   1   1   19.56    1.08
  -4   1  -1   18.59    1.03
   4   1   1   20.65    1.08
  -4   1  -1   20.72    1.09
  -5  -1  -1   44.88    2.19
   5  -1   1   44.18    2.24
  -5  -1  -1   47.10    2.23
   5  -1   1   46.08    2.27
  -5  -1  -1   45.14    2.45
  -5  -1  -1   45.72    2.25
   5  -1   1   44.56    2.23
   5   1   1   44.29    2.26
   5   1   1   44.15    2.24
  -5   1  -1   44.17    2.23
   5   1   1   48.89    2.39
  -5   1  -1   43.54    2.26
   5   1   1   46.00    2.24
  -5   1  -1   42.95    2.19
   6  -1   1    1.26    0.37
  -6  -1  -1    1.12    0.40
   6  -1   1    0.80    0.30
  -6  -1  -1    0.93    0.27
  -6  -1  -1    1.01    0.46
   6  -1   1    0.53    0.30
   6  -1   1    0.72    0.28
   6   1   1    0.89    0.34
   6   1   1    0.77    0.35
   6   1   1    0.99    0.29
  -6   1  -1    0.81    0.43
  -6   1  -1    0.68    0.28
  -6   1  -1    1.59    0.40
   6   1   1    0.63    0.31
  -6   1  -1    1.39    0.33
  -7  -1  -1   70.86    3.61
  -7  -1  -1   70.24    3.42
  -7  -1  -1   69.63    3.30
   7  -1   1   64.68    3.32
   7  -1   1   64.36    3.38
   7  -1   1   65.01    3.35
  -7   1  -1   67.23    3.31
   7   1   1   66.64    3.33
  -7   1  -1   69.12    3.59
   7   1   1   67.48    3.36
  -7   1  -1   65.93    3.39
   7   1   1   68.86    3.39
   8  -1   1   13.92    1.02
   8  -1   1   14.16    0.95
  -8  -1  -1   15.85    1.02
   8  -1   1   12.84    0.97
  -8  -1  -1   13.59    1.24
  -8  -1  -1   14.28    1.06
  -8  -1  -1   14.54    0.89
  -8   1  -1   14.72    1.23
   8   1   1   12.59    0.94
  -8   1  -1   14.38    0.92
  -8   1  -1   14.90    1.06
   8   1   1   13.86    1.02
   8   1   1   13.54    1.00
   9  -1   1  117.60    5.78
  -9  -1  -1  117.87    6.10
  -9  -1  -1  121.41    5.88
  -9  -1  -1  121.06    5.71
   9  -1   1  115.87    5.84
  -9  -1  -1  119.49    5.81
   9  -1   1  117.62    5.81
   9   1   1  119.28    5.82
  -9   1  -1  118.06    6.07
   9   1   1  119.91    5.85
   9   1   1  120.36    5.79
  -9   1  -1  117.88    5.73
  -9   1  -1  119.99    5.86
  10  -1   1   10.30    0.98
 -10  -1  -1   11.39    0.85
 -10  -1  -1   12.24    1.05
 -10  -1  -1   11.74    1.11
 -10  -1  -1   10.87    1.26
  10  -1   1   11.27    0.96
 -10   1  -1   11.64    1.22
  10   1   1   13.01    1.04
 -10   1  -1   11.43    1.07
  10   1   1   12.00    1.26
 -10   1  -1   11.79    0.86
  10   1   1   11.54    0.97
 -11  -1  -1   47.39    2.52
  11  -1   1   48.29    2.69
 -11  -1  -1   50.76    2.77
 -11  -1  -1   46.90    3.01
  11  -1   1   47.73    2.64
 -11  -1  -1   51.33    2.72
  11   1   1   48.50    2.65
 -11   1  -1   49.49    2.74
 -11   1  -1   47.09    2.99
  11   1   1   49.06    2.71
 -11   1  -1   50.79    2.54
  12  -1   1    1.40    0.69
 -12  -1  -1    1.93    0.81
 -12  -1  -1    2.55    0.74
  12  -1   1    1.05    0.58
 -12  -1  -1    1.41    0.48
 -12  -1  -1    2.73    0.95
 -12   1  -1    2.07    0.88
 -12   1  -1    1.63    0.50
 -12   1  -1    2.13    0.80
  12   1   1    2.84    0.65
 -12   1  -1    1.23    0.73
  12   1   1    2.60    0.71
  13  -1   1    6.57    0.92
 -13  -1  -1    7.10    1.07
  13  -1   1    8.28    1.01
 -13  -1  -1    6.87    1.24
 -13  -1  -1    6.62    1.08
  13   1   1    6.86    0.93
  13   1   1    6.97    0.98
 -13   1  -1    6.79    0.86
 -13   1  -1    8.44    1.13
 -13   1  -1    6.49    1.09
 -13   1  -1    7.57    1.23
  14  -1   1    0.30    0.77
 -14  -1  -1   -0.02    0.92
  14  -1   1   -0.58    0.69
 -14  -1  -1   -0.04    0.94
 -14   1  -1    0.51    0.96
  14   1   1   -0.38    0.65
  14   1   1    0.45    0.77
 -14   1  -1    0.41    0.89
 -14   1  -1   -0.41    0.88
 -15  -1  -1    0.76    0.98
  15  -1   1    1.45    0.89
  15  -1   1   -0.01    0.75
  15   1   1    1.22    0.79
  15   1   1    2.08    0.95
 -15   1  -1   -0.20    0.90
  16  -1   1    4.11    1.01
 -16  -1  -1    4.50    1.20
  16  -1   1    3.07    1.06
  16   1   1    3.99    1.13
  16   1   1    3.45    0.99
 -16   1  -1    3.56    1.12
  17  -1   1    0.06    0.98
 -17  -1  -1    0.07    1.00
  17  -1   1   -0.02    0.94
  17   1   1    1.19    1.01
 -17   1  -1    0.10    0.97
  17   1   1   -0.39    1.01
  18  -1   1   -1.33    0.97
 -18  -1  -1    0.21    1.08
  18  -1   1    1.65    1.18
  18   1   1    1.68    1.22
  18   1   1    2.51    1.12
 -18   1  -1    0.78    1.13
 -19  -1  -1    1.27    1.21
  19  -1   1    3.11    1.18
 -19   1  -1   -1.55    1.03
  19   1   1    0.98    1.13
  20  -2  -1    3.00    1.27
 -20  -2   1    1.78    1.24
 -20   2   1    1.65    1.15
  20   2  -1    2.57    1.25
 -19  -2   1    3.92    1.28
  19  -2  -1    5.36    1.28
  19   2  -1    6.02    1.32
 -19   2   1    4.44    1.21
 -18  -2   1    1.30    1.29
  18  -2  -1    4.61    1.15
 -18  -2   1    2.67    1.10
  18  -2  -1    2.31    1.15
  18   2  -1    3.23    1.20
 -18   2   1    2.31    1.07
  18   2  -1    0.54    1.05
 -17  -2   1    4.61    1.33
 -17  -2   1    5.21    1.14
  17  -2  -1    3.51    1.10
  17  -2  -1    5.31    1.23
 -17   2   1    4.08    1.10
 -17   2   1    4.53    1.28
  17   2  -1    4.55    1.25
  17   2  -1    4.13    1.07
  16  -2  -1    4.42    1.09
 -16  -2   1    1.66    1.14
 -16  -2   1    2.27    0.99
  16  -2  -1    2.46    0.92
  16   2  -1    4.49    1.02
  16   2  -1    3.58    1.10
 -16   2   1    2.63    1.02
 -16   2   1    3.96    1.31
 -16   2   1    3.53    1.10
  15  -2  -1   44.51    2.53
 -15  -2   1   43.63    3.12
 -15  -2   1   40.19    2.88
  15  -2  -1   42.02    2.54
 -15  -2   1   39.31    2.54
 -15   2   1   42.95    2.87
  15   2  -1   38.66    2.46
 -15   2   1   40.60    2.51
 -15   2   1   33.59    2.69
  15   2  -1   41.33    2.57
 -14  -2   1    2.20    1.03
  14  -2  -1    4.26    0.85
 -14  -2   1    3.85    0.92
  14  -2  -1    3.09    0.79
 -14  -2   1    1.88    1.08
  14   2  -1    3.24    0.89
  14   2  -1    4.12    0.81
 -14   2   1    3.82    1.02
 -14   2   1    3.46    1.04
 -14   2   1    3.53    0.88
  13  -2  -1   64.91    3.43
 -13  -2   1   64.24    3.57
 -13  -2   1   59.14    3.71
  13  -2  -1   62.64    3.36
 -13  -2   1   67.89    3.47
 -13   2   1   66.15    3.60
  13   2  -1   61.58    3.43
 -13   2   1   59.20    3.65
 -13   2   1   67.19    3.45
  13   2  -1   60.78    3.36
 -12  -2   1    6.48    1.02
  12  -2  -1    7.20    0.90
 -12  -2   1    6.17    1.06
  12  -2  -1    6.98    0.82
 -12  -2   1    7.92    1.02
 -12   2   1    9.39    1.10
  12   2  -1    6.79    0.90
  12   2  -1    6.46    0.79
 -12   2   1    7.91    1.06
 -12   2   1    7.27    0.96
 -11  -2   1    6.70    0.99
  11  -2  -1    6.68    0.74
  11  -2  -1    6.46    0.81
 -11  -2   1    8.38    0.97
 -11  -2   1    6.52    0.94
  11   2  -1    7.13    0.83
  11   2  -1    6.96    0.75
 -11   2   1    7.78    0.91
  11   2  -1    7.34    0.80
 -11   2   1    7.14    0.99
 -10  -2   1    1.54    0.65
  10  -2  -1    1.90    0.49
  10  -2  -1    2.12    0.45
 -10  -2   1    0.92    0.58
 -10  -2   1    0.64    0.55
  10  -2  -1    1.66    0.54
 -10   2   1    2.43    0.64
  10   2  -1    2.35    0.55
  10   2  -1    1.26    0.45
 -10   2   1    0.92    0.51
  10   2  -1    1.95    0.52
  -9  -2   1   46.40    2.67
   9  -2  -1   47.36    2.43
   9  -2  -1   45.05    2.36
  -9  -2   1   45.62    2.48
   9  -2  -1   45.79    2.43
  -9  -2   1   45.54    2.51
   9   2  -1   45.05    2.44
  -9   2   1   46.87    2.62
  -9   2   1   50.98    2.47
   9   2  -1   44.21    2.37
   9   2  -1   44.79    2.43
  -8  -2   1    2.25    0.59
   8  -2  -1    2.92    0.46
  -8  -2   1    2.39    0.50
  -8  -2   1    3.03    0.56
   8  -2  -1    2.68    0.40
   8  -2  -1    1.77    0.42
  -8   2   1    1.95    0.55
   8   2  -1    2.13    0.45
  -8   2   1    2.92    0.51
   8   2  -1    2.41    0.43
   8   2  -1    2.66    0.41
   7  -2  -1    0.23    0.25
   7  -2  -1    0.37    0.28
  -7  -2   1    0.30    0.43
  -7  -2   1    0.12    0.39
   7  -2  -1   -0.02    0.29
  -7  -2   1    0.18    0.35
  -7   2   1    0.31    0.24
  -7   2   1    0.22    0.34
   7   2  -1    0.14    0.29
  -7   2   1    0.27    0.45
   7   2  -1    0.03    0.31
  -7   2   1    0.55    0.41
   7   2  -1    0.39    0.31
   7   2  -1    0.43    0.27
  -6  -2   1   10.74    0.89
   6  -2  -1   10.08    0.72
  -6  -2   1   11.87    0.79
   6  -2  -1   10.69    0.67
   6  -2  -1   11.30    0.75
   6  -2  -1   11.78    0.73
  -6  -2   1   10.39    0.83
   6   2  -1   10.22    0.69
   6   2  -1   11.38    0.74
  -6   2   1   12.18    0.88
  -6   2   1   11.60    0.68
  -6   2   1   11.26    0.75
   6   2  -1   11.46    0.74
   6   2  -1   10.47    0.73
  -5  -2   1  143.58    6.82
  -5  -2   1  141.73    6.84
  -5  -2   1  144.89    6.85
   5  -2  -1  143.78    6.74
  -5  -2   1  141.08    6.91
   5  -2  -1  139.88    6.77
   5  -2  -1  142.94    6.79
  -5   2   1  148.00    6.80
   5   2  -1  141.06    6.78
   5   2  -1  144.66    6.79
  -5   2   1  158.28    6.91
   5   2  -1  142.96    6.77
   5   2  -1  132.38    6.80
  -4  -2   1    8.59    0.67
  -4  -2   1    9.67    0.62
   4  -2  -1    9.70    0.58
  -4  -2   1    8.66    0.70
  -4  -2   1    9.00    0.66
   4  -2  -1    9.28    0.59
  -4   2   1    9.46    0.59
   4   2  -1   10.04    0.57
   4   2  -1    8.67    0.57
  -4   2   1    8.66    0.66
   4   2  -1    8.59    0.58
   4   2  -1    9.50    0.57
  -3  -2   1  114.22    5.55
  -3  -2   1  116.27    5.53
   3  -2  -1  120.25    5.50
   3  -2  -1  114.30    5.51
  -3   2   1  120.49    5.52
   3   2  -1  113.54    5.49
   3   2  -1  123.28    5.49
   3   2  -1  112.92    5.50
  -2  -2   1   29.29    1.49
   2  -2  -1   27.28    1.43
   2  -2  -1   32.81    1.43
  -2   2   1   29.04    1.43
   1  -2  -1  919.26   44.18
  -1   2   1 1000.00   44.22
  -1   2   1  933.67   44.18
   0  -2  -1    1.65    0.17
   0  -2  -1    1.76    0.15
   0  -2   1    1.72    0.13
   0  -2  -1    1.68    0.15
   0  -2  -1    1.74    0.14
   0  -2  -1    1.90    0.15
   0   2   1    1.57    0.13
   0   2   1    1.57    0.13
   0   2   1    1.60    0.15
   0   2   1    1.85    0.18
   0   2  -1    1.64    0.13
  -1  -2  -1  934.01   43.33
   1  -2   1  939.05   43.32
   1  -2   1  922.83   43.32
  -1  -2  -1  940.96   43.35
  -1  -2  -1  930.54   43.33
  -1  -2  -1  926.23   43.32
   1  -2   1  905.49   43.32
  -1   2  -1  932.80   43.32
  -1   2  -1  942.74   43.32
   1   2   1  941.66   43.35
   1   2   1  926.26   43.32
  -1   2  -1  945.42   43.32
   1   2   1  934.43   43.33
   1   2   1  918.95   43.32
   1   2   1  948.76   43.33
  -2  -2  -1    1.23    0.21
  -2  -2  -1    0.78    0.19
   2  -2   1    1.17    0.21
   2  -2   1    0.97    0.21
  -2  -2  -1    1.13    0.22
   2  -2   1    1.01    0.19
   2   2   1    0.99    0.24
   2   2   1    1.18    0.20
   2   2   1    0.96    0.19
  -2   2  -1    0.99    0.20
   2   2   1    1.04    0.21
  -2   2  -1    0.97    0.19
   3  -2   1   92.84    4.45
   3  -2   1   98.57    4.45
  -3  -2  -1   89.55    4.45
   3  -2   1   88.07    4.44
  -3  -2  -1   93.08    4.46
  -3  -2  -1   92.98    4.44
   3   2   1   94.14    4.45
   3   2   1   93.89    4.47
   3   2   1   95.60    4.47
  -3   2  -1   91.28    4.43
   3   2   1   93.40    4.45
  -3   2  -1   96.29    4.48
  -3   2  -1   91.96    4.47
  -4  -2  -1   76.56    3.65
   4  -2   1   76.87    3.66
   4  -2   1   72.66    3.66
  -4  -2  -1   74.60    3.65
   4  -2   1   73.81    3.68
  -4  -2  -1   77.14    3.68
  -4  -2  -1   76.63    3.68
  -4   2  -1   76.06    3.67
   4   2   1   78.18    3.68
   4   2   1   79.37    3.70
   4   2   1   74.16    3.68
   4   2   1   78.58    3.71
  -4   2  -1   75.62    3.64
   4   2   1   74.54    3.68
  -4   2  -1   78.00    3.70
   5  -2   1   50.87    2.57
  -5  -2  -1   53.51    2.78
  -5  -2  -1   51.57    2.58
   5  -2   1   52.68    2.60
  -5  -2  -1   51.68    2.59
   5  -2   1   52.01    2.57
  -5  -2  -1   53.37    2.55
   5   2   1   54.25    2.63
  -5   2  -1   51.00    2.57
   5   2   1   52.80    2.62
  -5   2  -1   52.04    2.53
   5   2   1   51.72    2.60
   5   2   1   54.50    2.58
   5   2   1   52.36    2.60
  -5   2  -1   50.32    2.60
   5   2   1   51.60    2.58
   6  -2   1   -0.26    0.26
  -6  -2  -1   -0.25    0.34
  -6  -2  -1    0.70    0.45
  -6  -2  -1   -0.06    0.27
  -6  -2  -1    0.29    0.30
   6  -2   1    0.22    0.25
  -6  -2  -1    0.03    0.22
   6  -2   1   -0.05    0.28
   6   2   1    0.20    0.30
  -6   2  -1    0.49    0.29
   6   2   1    0.25    0.24
   6   2   1    0.30    0.31
  -6   2  -1   -0.07    0.25
  -6   2  -1    0.18    0.22
   6   2   1   -0.02    0.30
  -6   2  -1   -0.18    0.38
  -6   2  -1   -0.12    0.32
  -7  -2  -1  134.83    6.72
   7  -2   1  131.49    6.50
  -7  -2  -1  136.39    6.53
  -7  -2  -1  131.51    6.45
   7  -2   1  133.39    6.48
   7  -2   1  135.90    6.45
  -7  -2  -1  138.82    6.41
   7   2   1  132.98    6.50
   7   2   1  134.21    6.46
  -7   2  -1  131.72    6.50
   7   2   1  134.82    6.49
  -7   2  -1  142.81    6.70
  -7   2  -1  133.30    6.47
  -7   2  -1  137.16    6.44
  -8  -2  -1   -0.07    0.37
   8  -2   1    0.30    0.33
   8  -2   1   -0.29    0.37
  -8  -2  -1    0.43    0.52
  -8  -2  -1    0.27    0.43
   8  -2   1    0.39    0.35
  -8  -2  -1    0.24    0.28
  -8   2  -1    0.20    0.31
  -8   2  -1    0.16    0.43
  -8   2  -1   -0.11    0.47
   8   2   1   -0.28    0.34
   8   2   1   -0.14    0.30
   8   2   1    0.59    0.39
   9  -2   1  102.89    5.03
  -9  -2  -1   97.90    5.28
   9  -2   1   99.21    4.95
  -9  -2  -1   99.07    4.98
  -9  -2  -1  101.69    5.06
   9  -2   1  106.13    5.01
  -9  -2  -1  104.45    4.89
   9   2   1   97.53    5.02
  -9   2  -1  100.16    5.23
  -9   2  -1  104.68    5.04
  -9   2  -1  101.74    4.92
   9   2   1  101.11    5.00
   9   2   1   98.80    4.96
  10  -2   1    3.92    0.66
 -10  -2  -1    3.49    0.87
 -10  -2  -1    5.10    0.72
 -10  -2  -1    4.74    0.54
  10  -2   1    3.01    0.58
 -10  -2  -1    4.69    0.80
  10   2   1    3.39    0.85
 -10   2  -1    5.19    0.79
 -10   2  -1    4.03    0.84
  10   2   1    4.16    0.59
  10   2   1    4.10    0.67
 -10   2  -1    3.74    0.54
  11  -2   1   29.18    1.90
 -11  -2  -1   31.66    1.93
 -11  -2  -1   30.86    1.72
  11  -2   1   31.74    1.87
 -11  -2  -1   33.40    2.00
 -11  -2  -1   28.67    2.22
 -11   2  -1   32.86    1.97
 -11   2  -1   31.77    2.23
  11   2   1   29.12    1.91
 -11   2  -1   34.84    1.78
  11   2   1   29.59    1.85
 -12  -2  -1    4.68    1.06
  12  -2   1    5.83    0.82
 -12  -2  -1    7.44    1.03
  12  -2   1    6.19    0.89
 -12  -2  -1    7.00    0.65
 -12  -2  -1    7.66    0.97
 -12   2  -1    6.56    1.12
 -12   2  -1    4.90    0.92
  12   2   1    5.13    0.87
 -12   2  -1    5.10    0.65
  12   2   1    6.10    0.80
  13  -2   1   10.09    1.05
 -13  -2  -1    6.74    1.15
 -13  -2  -1   10.60    1.18
 -13  -2  -1    9.26    1.40
  13  -2   1    7.01    0.99
  13   2   1    6.79    0.95
 -13   2  -1    8.61    1.26
 -13   2  -1    8.83    1.19
 -13   2  -1    8.67    0.86
 -13   2  -1    7.35    1.15
  13   2   1    7.92    1.05
  14  -2   1   -0.31    0.72
 -14  -2  -1    1.06    0.91
 -14  -2  -1    0.41    0.98
  14  -2   1    0.77    0.80
  14   2   1    0.13    0.70
 -14   2  -1    0.60    1.06
  14   2   1    1.07    0.80
 -14   2  -1   -0.62    0.85
 -14   2  -1   -0.79    0.81
  15  -2   1   27.59    2.13
 -15  -2  -1   27.17    2.10
  15  -2   1   27.72    1.95
 -15  -2  -1   26.96    3.45
  15   2   1   26.00    1.98
 -15   2  -1   27.17    2.05
  15   2   1   27.91    2.09
  16  -2   1    0.33    0.87
 -16  -2  -1    1.84    1.07
  16  -2   1    0.46    1.04
  16   2   1    1.11    0.88
 -16   2  -1    0.53    0.92
  16   2   1    0.93    1.00
  17  -2   1   -0.94    0.87
 -17  -2  -1    0.07    1.06
  17  -2   1   -0.83    0.92
  17   2   1    0.45    1.05
 -17   2  -1   -0.96    0.95
  17   2   1    0.58    0.96
  18  -2   1    0.43    1.03
 -18  -2  -1   -0.40    1.09
  18  -2   1   -0.71    1.06
  18   2   1   -0.61    1.02
  18   2   1   -1.13    1.05
 -18   2  -1   -1.70    0.96
 -19  -2  -1   -0.03    1.12
  19  -2   1    0.30    1.11
 -19   2  -1   -1.39    1.05
  19   2   1    2.15    1.19
 -20  -3   1    1.94    1.28
  20  -3  -1    0.49    1.20
  20   3  -1    4.32    1.36
 -20   3   1    2.30    1.18
 -19  -3   1    2.94    2.16
 -19  -3   1    3.02    1.27
  19  -3  -1    5.61    1.29
  19   3  -1    7.91    1.40
 -19   3   1    5.29    1.28
  18  -3  -1    4.93    1.24
  18  -3  -1    3.33    1.18
 -18  -3   1    5.09    1.20
 -18  -3   1    3.55    1.42
  18   3  -1    3.73    1.14
  18   3  -1    5.15    1.42
 -18   3   1    3.34    1.12
  17  -3  -1    4.86    1.09
 -17  -3   1    4.98    1.12
 -17  -3   1    2.29    1.24
  17  -3  -1    5.58    1.20
 -17   3   1    2.56    1.26
 -17   3   1    4.73    1.07
  17   3  -1    3.91    1.24
  17   3  -1    3.25    1.08
  16  -3  -1   -0.22    0.79
  16  -3  -1   -0.32    0.89
 -16  -3   1    0.04    0.93
 -16  -3   1   -0.31    0.99
  16   3  -1    0.01    0.92
 -16   3   1    0.25    0.95
  16   3  -1   -0.47    0.83
 -16   3   1   -0.61    0.83
 -16   3   1   -2.19    0.99
 -15  -3   1   -0.98    0.93
  15  -3  -1    3.03    0.83
 -15  -3   1    0.22    0.90
  15  -3  -1    4.66    0.94
 -15   3   1    1.60    1.04
  15   3  -1    1.41    0.78
 -15   3   1    1.44    0.91
 -15   3   1    2.53    0.90
  15   3  -1    1.56    0.91
  14  -3  -1    0.67    0.72
  14  -3  -1    0.68    0.68
 -14  -3   1    1.17    0.84
 -14  -3   1   -0.14    0.95
 -14  -3   1   -1.08    0.93
  14   3  -1   -0.14    0.77
 -14   3   1   -0.93    0.88
 -14   3   1   -0.51    0.76
  14   3  -1   -0.45    0.63
 -14   3   1   -0.01    0.73
 -13  -3   1   14.01    1.57
  13  -3  -1   14.12    1.32
 -13  -3   1   14.91    1.36
 -13  -3   1   11.30    1.41
  13  -3  -1   13.43    1.21
  13   3  -1   15.57    1.26
  13   3  -1   16.45    1.36
 -13   3   1   11.83    1.41
 -13   3   1   18.35    1.38
 -13   3   1   16.26    1.57
  12  -3  -1    4.00    0.68
  12  -3  -1    3.55    0.75
 -12  -3   1    5.21    0.99
 -12  -3   1    4.87    0.96
 -12  -3   1    3.56    0.86
 -12   3   1    3.42    0.79
  12   3  -1    4.90    0.80
  12   3  -1    4.91    0.73
 -12   3   1    4.29    0.87
 -11  -3   1    4.76    0.84
  11  -3  -1    3.74    0.60
  11  -3  -1    3.64    0.66
 -11  -3   1    3.37    0.81
 -11  -3   1    3.86    0.83
  11   3  -1    3.83    0.66
  11   3  -1    4.75    0.72
 -11   3   1    2.87    0.77
 -11   3   1    3.36    0.72
  11   3  -1    3.63    0.63
  10  -3  -1    1.95    0.51
 -10  -3   1    1.27    0.59
 -10  -3   1    0.02    0.58
 -10  -3   1    0.62    0.61
  10  -3  -1    1.76    0.52
  10  -3  -1    1.83    0.44
 -10   3   1    1.47    0.54
  10   3  -1    1.95    0.51
 -10   3   1    0.40    0.54
  10   3  -1    1.62    0.45
  10   3  -1    1.22    0.49
  -9  -3   1    0.35    0.54
   9  -3  -1    1.54    0.46
  -9  -3   1    0.59    0.47
   9  -3  -1    1.58    0.39
  -9  -3   1   -0.01    0.49
   9  -3  -1    0.74    0.41
   9   3  -1    1.47    0.46
   9   3  -1    0.66    0.40
  -9   3   1    1.02    0.43
   9   3  -1    0.19    0.35
  -9   3   1    1.00    0.31
  -9   3   1    0.78    0.52
  -9   3   1    1.21    0.64
  -8  -3   1   16.73    1.17
   8  -3  -1   15.46    1.00
  -8  -3   1   16.66    1.29
  -8  -3   1   16.47    1.14
   8  -3  -1   17.56    1.08
   8  -3  -1   17.21    1.08
   8   3  -1   16.64    1.09
  -8   3   1   18.00    1.38
   8   3  -1   16.59    1.09
  -8   3   1   17.49    1.10
  -8   3   1   16.28    1.22
   8   3  -1   17.21    1.09
   8   3  -1   16.11    1.01
  -8   3   1   17.44    0.98
  -7  -3   1    6.27    0.64
   7  -3  -1    6.55    0.51
   7  -3  -1    5.35    0.56
   7  -3  -1    4.75    0.54
  -7  -3   1    6.64    0.69
  -7  -3   1    5.23    0.72
   7   3  -1    6.61    0.54
  -7   3   1    5.20    0.68
   7   3  -1    6.10    0.58
  -7   3   1    5.06    0.77
   7   3  -1    5.00    0.54
  -7   3   1    7.24    0.63
   7   3  -1    6.13    0.57
  -7   3   1    5.48    0.48
  -6  -3   1   11.11    0.89
  -6  -3   1   12.83    0.97
   6  -3  -1   13.54    0.80
  -6  -3   1   11.45    0.89
   6  -3  -1   13.03    0.75
   6  -3  -1   13.44    0.82
  -6  -3   1   11.53    0.85
   6   3  -1   13.19    0.82
   6   3  -1   12.98    0.80
   6   3  -1   12.44    0.80
  -6   3   1   12.67    0.91
  -6   3   1   11.40    0.74
   6   3  -1   12.05    0.76
  -6   3   1   12.72    0.82
   5  -3  -1  101.52    4.83
   5  -3  -1  101.30    4.88
   5  -3  -1  101.52    4.83
  -5  -3   1  104.15    4.94
  -5  -3   1  104.61    4.91
  -5  -3   1  101.01    5.01
   5  -3  -1  105.31    4.88
  -5  -3   1   97.40    4.93
   5   3  -1   98.62    4.88
  -5   3   1  110.04    4.99
   5   3  -1  103.22    4.87
   5   3  -1  100.77    4.86
   5   3  -1  103.18    4.88
  -5   3   1   97.45    4.84
  -5   3   1  103.57    4.89
  -4  -3   1   98.78    4.62
  -4  -3   1   90.76    4.61
   4  -3  -1   91.67    4.57
  -4  -3   1   98.17    4.68
   4  -3  -1   96.85    4.56
  -4  -3   1   94.13    4.59
   4  -3  -1   98.20    4.55
   4   3  -1   97.54    4.55
  -4   3   1  102.61    4.65
   4   3  -1   90.27    4.55
  -4   3   1   98.89    4.57
   4   3  -1   96.46    4.57
  -3  -3   1   82.98    4.12
   3  -3  -1   83.51    4.07
   3  -3  -1   90.78    4.07
  -3  -3   1   78.28    4.08
  -3  -3   1   84.83    4.36
  -3  -3   1   97.15    4.18
   3   3  -1   81.10    4.06
   3   3  -1   80.11    4.05
   3   3  -1   89.18    4.05
  -3   3   1   91.12    4.07
   2  -3  -1    0.44    0.12
  -2  -3   1    0.20    0.22
   2  -3  -1    0.10    0.15
   2  -3  -1    0.18    0.14
   2   3  -1    0.20    0.12
   2   3  -1    0.51    0.10
   2   3  -1    0.10    0.11
  -2   3   1    0.25    0.13
   1  -3  -1   68.57    3.06
   1  -3  -1   64.37    3.03
   1  -3  -1   65.92    3.02
  -1  -3   1   61.93    3.02
   1  -3  -1   62.81    3.03
   1   3  -1   62.64    3.02
  -1   3   1   63.35    3.03
   1   3  -1   63.84    3.03
  -1   3   1   67.17    3.03
   1   3  -1   61.50    3.02
   0  -3  -1   12.18    0.61
   0  -3  -1   11.88    0.61
   0  -3   1   11.69    0.60
   0  -3  -1   12.50    0.64
   0  -3  -1   12.03    0.61
   0   3   1   11.48    0.60
   0   3  -1   11.79    0.60
   0   3   1   12.56    0.61
   0   3  -1   11.81    0.60
   0   3   1   12.32    0.61
   0   3   1   12.79    0.62
   0   3  -1   11.95    0.61
   0   3  -1   11.32    0.60
   0   3   1   11.77    0.65
   1  -3   1  288.38   13.03
  -1  -3  -1  284.20   13.02
   1  -3   1  284.50   13.02
  -1  -3  -1  278.10   13.02
  -1  -3  -1  280.61   13.04
  -1  -3  -1  277.82   13.05
   1  -3   1  270.24   13.03
  -1  -3  -1  278.65   13.04
   1   3   1  278.49   13.03
   1   3   1  271.60   13.02
  -1   3  -1  269.93   13.01
  -1   3  -1  281.67   13.03
   1   3   1  278.89   13.02
   1   3   1  279.50   13.06
  -1   3  -1  281.50   13.02
  -1   3  -1  277.00   13.03
   1   3   1  285.57   13.03
   1   3   1  287.69   13.04
   2  -3   1   15.37    0.85
  -2  -3  -1   16.33    0.87
  -2  -3  -1   15.51    0.86
   2  -3   1   16.06    0.85
  -2  -3  -1   16.20    0.83
   2  -3   1   17.09    0.86
  -2  -3  -1   15.58    0.86
   2   3   1   15.47    0.85
  -2   3  -1   14.92    0.85
   2   3   1   15.80    0.88
  -2   3  -1   15.64    0.84
   2   3   1   17.80    0.87
   2   3   1   17.68    0.91
   2   3   1   16.07    0.83
  -3  -3  -1    0.60    0.22
  -3  -3  -1    0.41    0.22
   3  -3   1    0.68    0.19
   3  -3   1    0.48    0.21
   3  -3   1    1.04    0.24
  -3  -3  -1    0.46    0.22
   3  -3   1    0.66    0.22
  -3  -3  -1    0.48    0.22
  -3   3  -1    0.46    0.27
   3   3   1    0.17    0.22
   3   3   1    0.67    0.21
   3   3   1    0.63    0.21
  -3   3  -1    0.68    0.21
  -3   3  -1    0.76    0.20
   3   3   1    1.05    0.26
   3   3   1    0.37    0.20
   4  -3   1    5.67    0.44
  -4  -3  -1    5.63    0.43
  -4  -3  -1    5.55    0.47
   4  -3   1    5.39    0.46
  -4  -3  -1    5.68    0.47
   4  -3   1    5.33    0.47
  -4   3  -1    5.30    0.45
   4   3   1    4.08    0.44
  -4   3  -1    5.24    0.43
  -4   3  -1    5.54    0.50
   4   3   1    5.72    0.48
   4   3   1    6.27    0.52
   4   3   1    5.25    0.46
   4   3   1    5.17    0.45
   5  -3   1   42.46    2.17
  -5  -3  -1   43.96    2.16
   5  -3   1   44.49    2.21
  -5  -3  -1   44.20    2.20
  -5  -3  -1   44.71    2.19
   5  -3   1   41.06    2.18
  -5  -3  -1   45.85    2.41
   5   3   1   43.82    2.23
   5   3   1   44.04    2.19
   5   3   1   42.68    2.20
   5   3   1   44.76    2.22
  -5   3  -1   43.67    2.14
   5   3   1   44.92    2.23
  -5   3  -1   45.45    2.23
  -5   3  -1   42.54    2.18
   5   3   1   41.05    2.20
  -6  -3  -1    0.75    0.40
  -6  -3  -1    1.03    0.28
   6  -3   1    1.62    0.36
   6  -3   1    1.57    0.32
  -6  -3  -1    1.40    0.35
   6  -3   1    0.87    0.34
  -6  -3  -1    2.03    0.51
  -6  -3  -1    1.61    0.33
   6   3   1    1.99    0.39
  -6   3  -1    1.25    0.39
  -6   3  -1    0.94    0.30
   6   3   1    1.15    0.35
   6   3   1    1.55    0.40
  -6   3  -1    1.80    0.48
   6   3   1    1.34    0.36
  -6   3  -1    1.62    0.28
  -6   3  -1    1.68    0.36
   6   3   1    1.98    0.34
   7  -3   1   38.56    2.02
  -7  -3  -1   36.82    1.99
  -7  -3  -1   35.39    2.25
   7  -3   1   37.94    2.10
  -7  -3  -1   38.40    2.09
  -7  -3  -1   39.64    2.01
   7  -3   1   37.81    1.99
  -7  -3  -1   38.84    1.94
  -7   3  -1   38.88    1.90
  -7   3  -1   38.26    2.03
  -7   3  -1   39.55    2.05
  -7   3  -1   39.38    2.22
   7   3   1   37.02    2.03
  -7   3  -1   36.52    1.97
   7   3   1   38.04    2.06
   7   3   1   38.65    2.00
  -8  -3  -1   16.46    1.39
   8  -3   1   18.39    1.18
  -8  -3  -1   17.44    1.13
  -8  -3  -1   19.20    1.04
   8  -3   1   17.44    1.09
  -8  -3  -1   16.23    1.21
   8  -3   1   16.61    1.14
  -8   3  -1   16.19    1.17
   8   3   1   16.94    1.10
  -8   3  -1   17.81    1.13
   8   3   1   16.86    1.15
  -8   3  -1   17.16    1.08
   8   3   1   18.44    1.19
  -8   3  -1   18.73    1.36
  -9  -3  -1    6.08    1.01
   9  -3   1    7.74    0.74
  -9  -3  -1    6.81    0.78
  -9  -3  -1    9.72    0.95
   9  -3   1    8.38    0.80
   9  -3   1    8.45    0.80
  -9  -3  -1    7.37    0.65
  -9   3  -1    8.10    0.99
  -9   3  -1    7.97    0.70
   9   3   1    7.85    0.81
   9   3   1    8.50    0.83
  -9   3  -1    9.33    0.88
   9   3   1    8.91    0.79
 -10  -3  -1    0.55    0.60
 -10  -3  -1   -0.15    0.51
  10  -3   1   -0.10    0.47
 -10  -3  -1   -0.50    0.68
  10  -3   1    0.39    0.46
 -10  -3  -1    0.83    0.37
 -10   3  -1   -0.01    0.54
  10   3   1    0.95    0.45
 -10   3  -1    0.77    0.42
  10   3   1    0.15    0.77
 -10   3  -1    0.31    0.64
  10   3   1    0.31    0.47
  11  -3   1   25.48    1.54
  11  -3   1   21.41    1.56
 -11  -3  -1   22.64    1.36
 -11  -3  -1   22.85    1.59
 -11  -3  -1   25.92    1.68
 -11  -3  -1   23.88    1.94
 -11   3  -1   26.03    1.64
 -11   3  -1   23.63    1.44
  11   3   1   22.96    1.62
  11   3   1   21.38    1.52
 -11   3  -1   22.53    1.82
 -12  -3  -1   -0.66    0.39
 -12  -3  -1    0.12    0.81
  12  -3   1   -0.10    0.58
 -12  -3  -1    0.24    0.72
 -12  -3  -1   -0.25    0.66
  12  -3   1    0.01    0.55
 -12   3  -1   -0.53    0.43
  12   3   1    0.02    0.56
  12   3   1    0.04    0.62
 -12   3  -1   -0.47    0.71
 -12   3  -1   -0.66    0.66
 -13  -3  -1    1.80    0.99
  13  -3   1    1.71    0.70
 -13  -3  -1    0.40    0.89
 -13  -3  -1    0.36    0.83
  13  -3   1    2.22    0.75
 -13   3  -1    0.46    0.81
  13   3   1    0.79    0.75
  13   3   1    1.04    0.71
 -13   3  -1    3.98    1.06
 -13   3  -1    1.30    0.55
  14  -3   1    5.17    0.94
  14  -3   1    7.38    1.08
 -14  -3  -1    4.96    1.32
 -14  -3  -1    5.35    1.09
  14   3   1    5.79    1.05
 -14   3  -1    5.63    1.05
  14   3   1    5.74    0.96
 -14   3  -1    5.33    1.13
 -15  -3  -1    0.53    1.41
  15  -3   1    4.06    0.95
  15  -3   1    3.35    0.93
 -15  -3  -1    1.90    1.08
 -15   3  -1    3.47    1.06
  15   3   1    2.84    0.90
  15   3   1    2.52    0.94
  16  -3   1    5.86    1.11
 -16  -3  -1    5.03    1.21
  16  -3   1    8.01    1.29
  16   3   1    5.70    1.11
  16   3   1    5.89    1.22
 -16   3  -1    6.05    1.16
  17  -3   1    0.09    0.98
 -17  -3  -1    1.10    1.05
  17  -3   1    1.48    0.97
 -17   3  -1    0.80    1.02
  17   3   1   -0.12    1.01
  17   3   1    0.90    0.96
  18  -3   1   -0.99    1.13
  18  -3   1   -0.64    0.97
 -18  -3  -1   -1.78    0.98
 -18   3  -1   -0.91    1.02
  18   3   1    0.28    1.17
  18   3   1    2.11    1.13
 -19  -3  -1    1.92    1.24
  19  -3   1    4.30    1.28
  19   3   1    3.96    1.25
 -19   3  -1    2.09    1.21
 -19  -4   1    0.74    1.64
  19  -4  -1    3.06    1.18
 -19  -4   1    0.78    1.19
 -19   4   1    0.43    1.07
  19   4  -1    2.15    1.21
 -18  -4   1    0.77    1.04
 -18  -4   1    1.97    1.34
  18  -4  -1    1.12    1.16
  18  -4  -1    0.90    1.06
  18   4  -1   -1.33    1.05
 -18   4   1   -0.73    0.95
  18   4  -1    0.97    1.03
  17  -4  -1    0.45    0.94
  17  -4  -1    2.10    1.04
 -17  -4   1    0.60    0.95
 -17  -4   1   -0.47    1.13
 -17   4   1    1.36    0.92
  17   4  -1    0.97    1.05
  17   4  -1   -0.47    0.87
  16  -4  -1    1.06    0.89
  16  -4  -1    1.17    0.85
 -16  -4   1    0.52    1.03
 -16  -4   1    0.47    0.93
  16   4  -1   -0.41    0.83
 -16   4   1    1.27    1.16
 -16   4   1    0.31    0.88
  16   4  -1   -0.65    0.88
 -16   4   1    0.46    0.88
  15  -4  -1    0.21    0.82
 -15  -4   1   -0.51    0.88
 -15  -4   1   -1.98    0.90
  15  -4  -1    1.03    0.75
 -15   4   1    0.14    0.81
 -15   4   1    0.01    0.79
  15   4  -1   -0.79    0.73
  15   4  -1    1.19    0.90
 -15   4   1    0.98    1.00
  14  -4  -1    0.98    0.74
  14  -4  -1    0.43    0.68
 -14  -4   1   -0.31    0.81
 -14  -4   1   -0.45    0.90
 -14  -4   1   -0.80    0.91
 -14   4   1    0.27    0.74
 -14   4   1    0.11    0.92
  14   4  -1    0.00    0.76
  14   4  -1    0.24    0.67
 -14   4   1    1.95    0.86
  13  -4  -1   17.32    1.39
 -13  -4   1   20.43    1.65
  13  -4  -1   21.40    1.51
 -13  -4   1   17.26    1.51
 -13  -4   1   18.01    1.82
  13   4  -1   15.12    1.38
 -13   4   1   19.99    1.47
  13   4  -1   19.25    1.55
 -13   4   1   18.60    1.67
  12  -4  -1    0.88    0.62
 -12  -4   1    0.40    0.76
 -12  -4   1    2.45    0.81
 -12  -4   1   -0.17    0.75
  12  -4  -1    1.52    0.58
  12   4  -1    1.63    0.66
 -12   4   1    1.45    0.69
 -12   4   1    2.27    0.78
  12   4  -1    2.23    0.59
  11  -4  -1   15.43    1.17
 -11  -4   1   17.33    1.37
  11  -4  -1   16.60    1.26
 -11  -4   1   16.81    1.49
 -11  -4   1   15.24    1.34
  11   4  -1   15.72    1.24
 -11   4   1   18.42    1.27
  11   4  -1   15.83    1.27
 -11   4   1   17.63    1.42
  11   4  -1   15.83    1.16
 -10  -4   1    4.87    0.77
  10  -4  -1    3.99    0.62
  10  -4  -1    4.22    0.55
  10  -4  -1    4.12    0.64
 -10  -4   1    3.07    0.70
 -10  -4   1    3.77    0.79
  10   4  -1    3.91    0.62
 -10   4   1    3.04    0.59
 -10   4   1    4.10    0.89
 -10   4   1    5.69    0.79
  10   4  -1    4.15    0.55
  10   4  -1    3.20    0.60
   9  -4  -1    1.09    0.37
  -9  -4   1    0.80    0.51
  -9  -4   1    0.97    0.51
   9  -4  -1    1.48    0.46
   9  -4  -1    0.64    0.41
  -9  -4   1    0.87    0.60
  -9   4   1    0.82    0.59
  -9   4   1    0.78    0.48
   9   4  -1    0.52    0.43
   9   4  -1    0.81    0.42
  -9   4   1    0.70    0.43
   9   4  -1    0.15    0.42
   9   4  -1    0.76    0.39
   8  -4  -1   12.54    0.91
   8  -4  -1   12.76    0.92
  -8  -4   1   13.10    1.02
   8  -4  -1   13.49    0.85
  -8  -4   1   11.18    0.98
  -8  -4   1   12.68    1.11
   8   4  -1   13.14    0.93
   8   4  -1   14.55    0.94
  -8   4   1   13.41    1.06
  -8   4   1   13.86    0.83
   8   4  -1   12.37    0.91
  -8   4   1   11.90    1.18
  -8   4   1   12.50    0.92
   8   4  -1   12.49    0.86
   7  -4  -1  143.80    6.90
   7  -4  -1  141.71    6.89
  -7  -4   1  141.62    6.94
  -7  -4   1  141.09    7.09
   7  -4  -1  144.54    6.85
  -7  -4   1  143.30    6.95
  -7   4   1  141.67    6.84
  -7   4   1  150.04    7.16
   7   4  -1  145.92    6.91
   7   4  -1  141.73    6.86
   7   4  -1  142.99    6.88
   7   4  -1  143.94    6.91
  -7   4   1  148.57    6.91
  -7   4   1  152.38    7.04
   6  -4  -1    2.22    0.30
  -6  -4   1    1.91    0.43
   6  -4  -1    2.65    0.37
  -6  -4   1    1.87    0.46
  -6  -4   1    2.22    0.44
   6  -4  -1    2.33    0.38
  -6  -4   1    2.24    0.43
  -6   4   1    2.00    0.30
   6   4  -1    2.15    0.32
  -6   4   1    2.15    0.44
   6   4  -1    1.84    0.35
   6   4  -1    2.34    0.35
   6   4  -1    2.12    0.33
  -6   4   1    2.56    0.38
   5  -4  -1   55.10    2.67
   5  -4  -1   54.88    2.62
  -5  -4   1   52.52    2.81
  -5  -4   1   55.04    2.73
   5  -4  -1   55.25    2.66
  -5  -4   1   53.11    2.63
  -5  -4   1   53.41    2.69
  -5  -4   1   53.69    2.72
   5  -4  -1   51.36    2.61
  -5   4   1   58.29    2.76
   5   4  -1   55.58    2.67
   5   4  -1   51.33    2.63
  -5   4   1   57.55    2.66
   5   4  -1   55.71    2.65
  -5   4   1   51.82    2.63
  -4  -4   1   11.35    0.74
   4  -4  -1   13.29    0.67
   4  -4  -1   11.00    0.71
   4  -4  -1   12.06    0.73
  -4  -4   1   12.51    0.84
   4  -4  -1   13.09    0.68
  -4  -4   1   12.47    0.82
  -4  -4   1   11.76    0.78
   4   4  -1   12.01    0.72
   4   4  -1   11.64    0.70
  -4   4   1   10.84    0.69
  -4   4   1   12.54    0.71
   4   4  -1   12.60    0.69
  -4   4   1   13.24    0.78
   3  -4  -1   34.58    1.72
  -3  -4   1   33.28    1.73
   3  -4  -1   36.88    1.72
  -3  -4   1   35.29    1.79
  -3  -4   1   31.46    1.69
   3  -4  -1   33.93    1.72
  -3  -4   1   35.82    1.75
   3  -4  -1   36.96    1.69
  -3  -4   1   35.35    1.81
  -3   4   1   36.86    1.71
   3   4  -1   34.73    1.69
   3   4  -1   34.03    1.71
   3   4  -1   36.39    1.71
   3   4  -1   32.89    1.70
   2  -4  -1   17.31    0.82
  -2  -4   1   14.63    0.82
   2  -4  -1   16.38    0.84
   2  -4  -1   15.33    0.84
   2   4  -1   14.97    0.82
   2   4  -1   15.69    0.83
   2   4  -1   15.69    0.81
  -2   4   1   17.24    0.81
   1  -4  -1   55.24    2.60
   1  -4  -1   54.73    2.59
   1  -4  -1   57.74    2.59
  -1  -4   1   54.28    2.59
   1  -4  -1   54.99    2.64
  -1   4   1   57.24    2.60
  -1   4   1   47.21    2.59
   1   4  -1   54.30    2.60
   1   4  -1   55.07    2.59
  -1   4   1   52.60    2.58
   1   4  -1   55.42    2.59
  -1   4   1   56.96    2.59
   0  -4  -1    2.20    0.20
   0  -4   1    2.23    0.20
   0  -4  -1    1.97    0.21
   0  -4  -1    2.23    0.21
   0   4   1    2.37    0.21
   0   4   1    2.04    0.19
   0   4   1    2.23    0.21
   0   4  -1    2.36    0.19
   0   4   1    2.02    0.20
   0   4  -1    1.97    0.19
   0   4  -1    2.13    0.21
   0   4  -1    1.84    0.20
   0   4   1    2.62    0.27
   0   4  -1    2.00    0.18
  -1  -4  -1  801.03   36.99
   1  -4   1  806.43   37.00
   1  -4   1  772.11   37.00
  -1  -4  -1  811.93   37.01
  -1  -4  -1  802.23   36.99
  -1  -4  -1  808.48   37.01
  -1  -4  -1  804.31   37.03
   1  -4   1  790.50   36.99
  -1   4  -1  785.96   37.00
   1   4   1  796.16   37.00
   1   4   1  785.30   37.00
  -1   4  -1  773.96   36.98
   1   4   1  802.11   37.03
  -1   4  -1  794.72   36.99
  -1   4  -1  773.45   36.99
   1   4   1  810.55   37.01
   1   4   1  812.82   37.00
  -2  -4  -1    1.21    0.25
   2  -4   1    1.14    0.22
  -2  -4  -1    0.87    0.23
  -2  -4  -1    1.31    0.20
   2  -4   1    0.43    0.20
  -2  -4  -1    1.15    0.23
   2  -4   1    0.96    0.21
   2   4   1    1.02    0.21
  -2   4  -1    0.55    0.21
   2   4   1    0.74    0.21
   2   4   1    1.16    0.22
   2   4   1    1.06    0.25
   2   4   1    1.04    0.19
  -2   4  -1    0.99    0.23
   3  -4   1   38.41    1.86
   3  -4   1   36.67    1.86
  -3  -4  -1   36.43    1.86
  -3  -4  -1   37.81    1.87
  -3  -4  -1   36.64    1.86
   3  -4   1   38.88    1.84
  -3  -4  -1   37.14    1.83
   3  -4   1   36.96    1.85
  -3   4  -1   38.20    1.86
   3   4   1   36.45    1.87
   3   4   1   37.16    1.87
   3   4   1   38.82    1.89
  -3   4  -1   37.77    1.94
  -3   4  -1   38.70    1.84
   3   4   1   36.15    1.86
   4  -4   1  151.46    6.99
   4  -4   1  148.40    6.96
  -4  -4  -1  149.22    6.99
   4  -4   1  148.24    6.99
   4  -4   1  140.23    6.97
  -4  -4  -1  151.15    6.95
  -4  -4  -1  149.53    6.93
  -4  -4  -1  148.13    6.98
   4   4   1  143.89    6.98
   4   4   1  152.28    7.01
  -4   4  -1  147.93    6.94
   4   4   1  143.99    6.99
  -4   4  -1  147.78    6.98
   4   4   1  150.19    7.00
  -4   4  -1  149.59    7.09
   4   4   1  141.12    6.98
  -5  -4  -1   28.33    1.47
   5  -4   1   27.81    1.50
  -5  -4  -1   29.99    1.74
  -5  -4  -1   30.74    1.51
  -5  -4  -1   28.91    1.52
   5  -4   1   27.81    1.52
   5  -4   1   28.66    1.49
  -5   4  -1   29.44    1.53
   5   4   1   28.93    1.55
   5   4   1   28.07    1.52
   5   4   1   28.22    1.55
  -5   4  -1   28.21    1.45
   5   4   1   28.47    1.53
   5   4   1   29.43    1.55
   5   4   1   28.47    1.51
  -5   4  -1   28.49    1.51
  -6  -4  -1   17.04    1.20
   6  -4   1   20.05    1.15
  -6  -4  -1   19.82    1.38
  -6  -4  -1   18.84    1.07
   6  -4   1   18.91    1.13
   6  -4   1   19.30    1.11
  -6  -4  -1   18.51    1.13
  -6   4  -1   21.35    1.33
   6   4   1   19.76    1.16
  -6   4  -1   19.69    1.17
   6   4   1   19.90    1.15
   6   4   1   19.62    1.13
   6   4   1   20.26    1.19
  -6   4  -1   19.24    1.05
  -6   4  -1   19.65    1.16
  -6   4  -1   19.72    1.13
   6   4   1   20.26    1.18
  -7  -4  -1   13.36    1.20
  -7  -4  -1   14.04    0.94
   7  -4   1   14.71    0.96
  -7  -4  -1   12.46    1.02
  -7  -4  -1   13.93    0.85
   7  -4   1   14.32    0.90
  -7   4  -1   15.42    1.14
   7   4   1   12.79    0.92
   7   4   1   12.93    0.98
   7   4   1   14.54    0.97
  -7   4  -1   14.41    0.96
  -7   4  -1   12.35    0.90
  -7   4  -1   14.99    0.82
   7   4   1   14.35    1.01
  -7   4  -1   13.63    0.97
  -8  -4  -1   13.52    0.85
  -8  -4  -1   14.01    0.94
   8  -4   1   13.71    0.93
   8  -4   1   12.37    0.96
   8  -4   1   15.19    1.03
  -8  -4  -1   12.54    1.06
  -8  -4  -1   12.55    1.21
  -8   4  -1   12.76    1.01
   8   4   1   12.71    1.01
   8   4   1   14.10    1.03
  -8   4  -1   13.28    0.92
   8   4   1   14.30    0.95
  -8   4  -1   12.81    1.14
   8   4   1   13.79    0.99
  -8   4  -1   11.45    0.94
  -9  -4  -1    3.63    0.70
  -9  -4  -1    3.51    0.83
   9  -4   1    4.51    0.61
   9  -4   1    3.21    0.61
  -9  -4  -1    3.62    0.59
  -9  -4  -1    3.34    0.44
   9  -4   1    2.56    0.51
   9   4   1    4.51    0.67
  -9   4  -1    3.37    0.62
  -9   4  -1    3.86    0.58
  -9   4  -1    4.05    0.77
   9   4   1    3.46    0.59
  -9   4  -1    3.79    0.54
   9   4   1    3.79    0.55
  10  -4   1   10.83    0.96
 -10  -4  -1   10.56    0.96
 -10  -4  -1    9.94    0.77
 -10  -4  -1   10.89    1.15
 -10  -4  -1    7.51    1.13
  10  -4   1   11.10    0.93
  10   4   1    8.33    0.86
 -10   4  -1   12.27    1.02
  10   4   1    9.47    0.94
 -10   4  -1   10.03    1.13
 -10   4  -1   11.02    0.88
 -11  -4  -1    7.98    0.89
  11  -4   1    7.66    0.82
  11  -4   1    5.80    0.81
 -11  -4  -1    6.66    1.13
 -11  -4  -1    6.28    0.94
 -11  -4  -1    6.12    0.62
 -11   4  -1    7.15    1.07
  11   4   1    6.66    0.81
  11   4   1    6.11    0.85
 -11   4  -1    8.51    0.98
 -11   4  -1    6.82    0.72
 -12  -4  -1    6.04    0.89
  12  -4   1    5.35    0.78
  12  -4   1    4.33    0.82
 -12  -4  -1    5.85    1.08
 -12  -4  -1    4.48    0.94
  12   4   1    5.01    0.80
 -12   4  -1    6.65    0.72
 -12   4  -1    4.26    0.89
 -12   4  -1    7.40    1.13
  12   4   1    5.45    0.88
  13  -4   1    6.74    0.94
  13  -4   1    4.65    0.89
 -13  -4  -1    7.32    1.16
 -13  -4  -1    6.19    1.27
 -13   4  -1    5.17    1.12
  13   4   1    4.53    0.91
 -13   4  -1    6.58    0.77
  13   4   1    6.87    0.93
 -13   4  -1    8.16    1.10
 -14  -4  -1   -1.27    0.82
  14  -4   1    1.12    0.77
 -14  -4  -1   -0.08    1.05
  14  -4   1    0.17    0.75
 -14   4  -1    1.32    0.86
  14   4   1    1.80    0.84
  14   4   1    0.28    0.74
  15  -4   1    1.60    0.83
 -15  -4  -1    0.68    1.21
  15  -4   1    0.14    0.80
 -15  -4  -1   -0.75    0.94
 -15   4  -1    0.59    1.06
  15   4   1    0.57    0.81
 -15   4  -1   -0.11    0.90
  15   4   1    2.39    0.93
 -16  -4  -1    0.88    1.05
  16  -4   1    1.06    0.91
  16  -4   1   -0.67    0.89
 -16   4  -1    2.17    0.98
  16   4   1    1.48    0.99
  16   4   1   -0.32    0.87
 -17  -4  -1    1.39    1.08
  17  -4   1    0.78    0.94
  17  -4   1   -0.61    0.96
  17   4   1    3.33    1.17
 -17   4  -1    0.29    0.96
  17   4   1    1.60    1.00
  18  -4   1    1.53    1.05
 -18  -4  -1    1.12    1.10
  18   4   1    1.47    1.09
  18   4   1    0.98    1.48
 -18   4  -1   -1.09    0.97
 -19  -4  -1    0.65    1.19
  19  -4   1    2.10    1.19
  19   4   1    3.17    1.23
 -19   4  -1    0.10    1.11
  19  -5  -1   -0.95    1.09
 -19  -5   1   -0.16    1.14
 -19  -5   1   -0.49    1.43
 -19   5   1    1.50    1.08
  19   5  -1   -0.05    1.19
  18  -5  -1    0.67    1.06
 -18  -5   1    0.96    1.04
  18  -5  -1    1.08    1.12
 -18  -5   1   -0.89    1.24
  18   5  -1    2.31    1.09
  18   5  -1   -0.64    1.11
 -18   5   1    1.68    1.03
 -17  -5   1    1.86    1.27
  17  -5  -1    1.30    1.04
 -17  -5   1    2.65    1.07
  17  -5  -1    2.61    1.04
 -17   5   1    3.21    1.06
  17   5  -1    3.50    1.05
  17   5  -1    1.84    1.17
 -16  -5   1   -0.24    0.93
  16  -5  -1    0.26    0.89
  16  -5  -1   -0.26    0.82
 -16  -5   1    0.63    1.09
 -16   5   1   -1.04    1.02
 -16   5   1    0.30    0.94
  16   5  -1    0.79    0.91
  16   5  -1    0.41    0.82
 -16   5   1    0.19    0.90
 -15  -5   1   10.96    1.57
  15  -5  -1   10.70    1.20
  15  -5  -1    8.17    1.18
 -15  -5   1    9.18    1.30
  15   5  -1    9.89    1.32
 -15   5   1   15.18    1.63
  15   5  -1   11.31    1.27
 -15   5   1    8.87    1.27
 -15   5   1   11.81    1.27
 -14  -5   1    6.06    1.08
  14  -5  -1    4.02    0.90
  14  -5  -1    6.72    0.95
 -14  -5   1    4.44    1.19
 -14  -5   1    7.97    1.26
  14   5  -1    6.29    0.99
 -14   5   1    8.14    1.05
 -14   5   1    6.30    1.08
  14   5  -1    3.72    1.00
 -13  -5   1    3.36    1.05
 -13  -5   1    5.33    0.99
 -13  -5   1    5.27    0.98
  13  -5  -1    5.78    0.82
  13  -5  -1    4.73    0.83
  13   5  -1    2.99    0.83
 -13   5   1    5.08    0.86
 -13   5   1    5.01    0.96
  13   5  -1    3.02    0.75
 -12  -5   1   10.16    1.21
  12  -5  -1   11.50    1.05
 -12  -5   1   12.47    1.42
 -12  -5   1   13.24    1.26
  12  -5  -1   12.89    1.15
  12   5  -1   12.12    1.16
 -12   5   1    9.99    1.21
  12   5  -1   13.64    1.11
 -12   5   1   14.09    1.19
 -11  -5   1    0.21    0.68
  11  -5  -1    0.40    0.45
 -11  -5   1    0.02    0.69
  11  -5  -1    0.37    0.52
 -11  -5   1    0.16    0.63
 -11   5   1    0.14    0.58
 -11   5   1    0.20    0.55
  11   5  -1    0.46    0.53
  11   5  -1    0.99    0.55
  11   5  -1    1.22    0.50
 -10  -5   1    1.95    0.64
  10  -5  -1    1.67    0.55
 -10  -5   1    1.38    0.63
 -10  -5   1    0.91    0.62
  10  -5  -1    1.20    0.44
  10  -5  -1    0.82    0.47
  10   5  -1    1.08    0.52
  10   5  -1    2.18    0.53
  10   5  -1    1.40    0.45
 -10   5   1    1.77    0.41
 -10   5   1    1.64    0.52
 -10   5   1    1.65    0.60
 -10   5   1    2.20    0.82
  10   5  -1    1.71    0.52
   9  -5  -1    4.87    0.57
   9  -5  -1    5.73    0.64
   9  -5  -1    5.55    0.64
  -9  -5   1    4.88    0.71
  -9  -5   1    4.59    0.80
  -9  -5   1    5.30    0.76
  -9   5   1    5.48    0.90
   9   5  -1    5.12    0.58
   9   5  -1    5.00    0.62
  -9   5   1    6.04    0.55
  -9   5   1    5.76    0.67
   9   5  -1    6.43    0.67
  -9   5   1    5.27    0.72
   9   5  -1    5.72    0.66
  -8  -5   1   20.80    1.29
  -8  -5   1   18.47    1.40
   8  -5  -1   18.15    1.18
  -8  -5   1   18.58    1.26
   8  -5  -1   19.84    1.13
   8  -5  -1   18.82    1.20
  -8   5   1   19.89    1.18
   8   5  -1   19.48    1.21
   8   5  -1   19.06    1.20
  -8   5   1   18.97    1.48
   8   5  -1   19.56    1.14
   8   5  -1   18.70    1.18
  -8   5   1   19.35    1.31
  -8   5   1   18.77    1.12
   7  -5  -1   32.27    1.70
  -7  -5   1   29.75    1.76
  -7  -5   1   28.81    1.88
  -7  -5   1   31.58    1.75
   7  -5  -1   32.77    1.65
   7  -5  -1   31.35    1.70
  -7  -5   1   30.10    1.77
   7   5  -1   30.65    1.69
  -7   5   1   32.74    1.69
  -7   5   1   35.15    1.84
   7   5  -1   30.69    1.66
   7   5  -1   30.94    1.68
  -7   5   1   30.36    2.22
  -7   5   1   32.45    1.64
   7   5  -1   31.24    1.71
   6  -5  -1   10.01    0.75
  -6  -5   1   10.80    0.82
  -6  -5   1   11.36    0.69
  -6  -5   1   11.09    0.93
  -6  -5   1    9.83    0.77
  -6  -5   1   10.44    0.84
   6  -5  -1   10.13    0.74
   6  -5  -1   10.07    0.67
   6   5  -1   10.42    0.76
  -6   5   1   11.87    0.84
   6   5  -1   10.89    0.71
  -6   5   1   10.38    0.70
   6   5  -1   10.51    0.72
  -6   5   1   11.10    0.72
   5  -5  -1  196.55    9.51
  -5  -5   1  191.76    9.57
  -5  -5   1  197.69    9.61
   5  -5  -1  207.73    9.56
  -5  -5   1  209.71    9.71
   5  -5  -1  203.68    9.55
  -5  -5   1  203.59    9.60
  -5  -5   1  200.23    9.52
   5  -5  -1  211.28    9.51
  -5   5   1  194.14    9.53
   5   5  -1  202.43    9.54
   5   5  -1  200.24    9.53
   5   5  -1  195.76    9.55
  -5   5   1  209.38    9.54
  -5   5   1  205.06    9.65
  -5   5   1  216.86    9.65
  -4  -5   1   62.20    3.09
   4  -5  -1   62.33    2.92
  -4  -5   1   54.79    3.02
  -4  -5   1   59.89    2.93
   4  -5  -1   61.45    2.96
   4  -5  -1   63.24    2.93
  -4  -5   1   58.31    2.97
  -4  -5   1   63.67    3.00
   4  -5  -1   60.97    2.96
   4  -5  -1   59.35    2.96
  -4   5   1   60.98    2.95
   4   5  -1   57.35    2.96
  -4   5   1   67.45    3.04
   4   5  -1   61.69    2.94
  -4   5   1   63.81    2.94
   4   5  -1   62.76    2.94
  -4   5   1   61.61    3.05
   4   5  -1   57.20    2.96
  -3  -5   1   56.15    2.83
  -3  -5   1   63.09    2.95
  -3  -5   1   60.08    2.87
   3  -5  -1   58.35    2.84
   3  -5  -1   57.78    2.84
   3  -5  -1   62.72    2.82
  -3  -5   1   54.63    2.84
   3  -5  -1   61.47    2.81
   3   5  -1   56.81    2.84
  -3   5   1   62.05    2.82
  -3   5   1   58.39    2.84
   3   5  -1   54.69    2.83
  -3   5   1   61.03    2.80
   3   5  -1   62.25    2.84
   3   5  -1   56.44    2.82
  -2  -5   1   20.77    1.12
   2  -5  -1   22.46    1.13
   2  -5  -1   23.10    1.11
   2  -5  -1   21.46    1.13
  -2   5   1   23.46    1.10
   2   5  -1   22.24    1.12
   2   5  -1   22.02    1.11
   2   5  -1   21.98    1.12
   1  -5  -1    3.93    0.35
  -1  -5   1    4.20    0.34
   1  -5  -1    4.61    0.33
   1  -5  -1    4.47    0.46
   1  -5  -1    4.05    0.35
   1   5  -1    4.67    0.33
   1   5  -1    3.84    0.33
  -1   5   1    4.45    0.35
   1   5  -1    4.52    0.34
   1   5  -1    4.13    0.32
   1   5  -1    3.49    0.31
  -1   5   1    4.04    0.32
  -1   5   1    4.66    0.33
   0  -5   1   10.31    0.54
   0  -5  -1    9.57    0.53
   0  -5  -1    8.85    0.54
   0  -5  -1    9.62    0.55
   0  -5   1    9.44    0.54
   0   5  -1    9.21    0.52
   0   5   1    8.84    0.53
   0   5   1    8.71    0.53
   0   5   1   10.11    0.60
   0   5  -1    9.10    0.54
   0   5  -1    9.12    0.53
   0   5  -1    8.97    0.52
   0   5  -1    8.99    0.52
   0   5   1    9.73    0.54
  -1  -5  -1   18.27    0.93
  -1  -5  -1   18.65    0.93
   1  -5   1   17.97    0.90
   1  -5   1   16.09    0.91
  -1  -5  -1   17.32    0.89
  -1  -5  -1   18.81    0.90
   1  -5   1   18.10    0.91
  -1  -5  -1   17.89    0.95
   1   5   1   18.65    0.91
  -1   5  -1   16.33    0.89
  -1   5  -1   15.71    0.91
   1   5   1   16.71    0.90
   1   5   1   18.60    0.96
  -1   5  -1   17.03    0.90
   1   5   1   17.53    0.92
  -2  -5  -1    4.65    0.41
  -2  -5  -1    4.44    0.36
  -2  -5  -1    4.39    0.39
  -2  -5  -1    4.12    0.34
   2  -5   1    4.74    0.40
   2  -5   1    5.47    0.39
  -2  -5  -1    4.90    0.41
   2  -5   1    3.96    0.35
   2  -5   1    5.11    0.38
  -2   5  -1    4.45    0.38
   2   5   1    4.66    0.39
  -2   5  -1    4.97    0.46
   2   5   1    4.25    0.36
   2   5   1    4.76    0.39
   2   5   1    4.86    0.44
   2   5   1    4.54    0.39
   2   5   1    4.17    0.37
  -2   5  -1    5.27    0.38
  -3  -5  -1    3.35    0.37
  -3  -5  -1    4.00    0.32
   3  -5   1    3.66    0.36
   3  -5   1    3.94    0.34
  -3  -5  -1    2.68    0.34
   3  -5   1    3.42    0.35
   3  -5   1    3.39    0.35
  -3  -5  -1    3.38    0.35
  -3   5  -1    4.06    0.47
   3   5   1    2.95    0.35
   3   5   1    3.36    0.37
   3   5   1    2.94    0.31
   3   5   1    2.85    0.33
  -3   5  -1    2.53    0.31
  -3   5  -1    3.38    0.36
  -3   5  -1    3.72    0.32
   3   5   1    4.04    0.41
   3   5   1    4.07    0.36
  -4  -5  -1    2.71    0.28
   4  -5   1    2.34    0.35
   4  -5   1    2.31    0.32
  -4  -5  -1    2.04    0.32
   4  -5   1    3.28    0.33
  -4  -5  -1    2.52    0.36
  -4  -5  -1    2.01    0.28
  -4  -5  -1    2.70    0.34
   4  -5   1    3.32    0.38
   4   5   1    1.77    0.35
   4   5   1    2.67    0.37
   4   5   1    2.82    0.40
  -4   5  -1    2.38    0.45
  -4   5  -1    2.25    0.32
   4   5   1    1.98    0.32
  -4   5  -1    2.67    0.30
  -5  -5  -1   57.33    2.86
   5  -5   1   58.27    2.83
   5  -5   1   58.86    2.86
  -5  -5  -1   60.65    2.80
  -5  -5  -1   60.11    2.84
   5  -5   1   57.70    2.86
   5  -5   1   54.08    2.83
  -5  -5  -1   56.23    3.06
  -5   5  -1   55.07    2.98
   5   5   1   56.87    2.85
  -5   5  -1   58.14    2.79
   5   5   1   59.99    2.86
   5   5   1   56.49    2.88
  -5   5  -1   58.46    2.85
   5   5   1   59.60    2.88
  -5   5  -1   56.50    2.85
   5   5   1   54.86    2.85
   5   5   1   60.49    2.89
  -6  -5  -1   42.79    2.12
  -6  -5  -1   40.54    2.04
  -6  -5  -1   39.39    2.34
   6  -5   1   38.87    2.09
  -6  -5  -1   40.30    2.07
   6  -5   1   40.88    2.08
  -6  -5  -1   43.19    2.19
   6  -5   1   40.33    2.11
  -6   5  -1   43.15    2.29
   6   5   1   40.37    2.14
   6   5   1   39.24    2.14
  -6   5  -1   39.97    2.10
  -6   5  -1   40.80    2.02
   6   5   1   43.85    2.15
  -6   5  -1   39.11    2.11
   6   5   1   40.21    2.10
   6   5   1   42.48    2.12
   7  -5   1    9.42    0.72
  -7  -5  -1    8.87    0.77
  -7  -5  -1    9.20    0.66
  -7  -5  -1   10.37    0.88
  -7  -5  -1   10.09    0.71
   7  -5   1    9.48    0.77
  -7  -5  -1   10.22    1.06
  -7   5  -1   10.84    0.95
  -7   5  -1   10.70    0.81
   7   5   1    9.72    0.80
   7   5   1    9.20    0.81
  -7   5  -1    9.64    0.65
   7   5   1    8.46    0.74
  -7   5  -1    9.21    0.78
   7   5   1    7.64    0.75
  -7   5  -1   10.22    0.75
   8  -5   1    4.00    0.56
  -8  -5  -1    3.83    0.44
  -8  -5  -1    4.30    0.69
  -8  -5  -1    3.70    0.53
  -8  -5  -1    3.33    0.73
   8  -5   1    4.89    0.55
  -8   5  -1    4.25    0.52
  -8   5  -1    4.58    0.62
   8   5   1    6.05    0.64
   8   5   1    4.56    0.55
   8   5   1    3.75    0.59
  -8   5  -1    4.46    0.72
   8   5   1    3.60    0.58
  -8   5  -1    4.06    0.58
   9  -5   1  118.84    5.89
  -9  -5  -1  118.87    6.00
   9  -5   1  125.13    6.02
  -9  -5  -1  126.33    5.89
  -9  -5  -1  118.47    5.79
  -9  -5  -1  122.75    6.26
  -9  -5  -1  118.80    5.89
   9  -5   1  119.42    5.92
   9   5   1  123.47    5.92
  -9   5  -1  120.91    5.94
  -9   5  -1  129.07    6.17
   9   5   1  121.27    5.97
   9   5   1  120.03    5.94
  -9   5  -1  117.72    5.93
  -9   5  -1  122.24    5.88
   9   5   1  119.56    5.99
  10  -5   1   -0.02    0.44
 -10  -5  -1   -0.17    0.33
  10  -5   1    0.38    0.47
 -10  -5  -1    0.04    0.61
 -10  -5  -1   -0.85    0.64
 -10   5  -1    0.15    0.64
  10   5   1    0.30    0.51
 -10   5  -1   -0.31    0.41
  10   5   1   -0.04    0.42
 -10   5  -1   -0.27    0.50
 -11  -5  -1   42.33    2.92
 -11  -5  -1   48.06    2.59
 -11  -5  -1   45.66    2.37
 -11  -5  -1   46.74    2.69
  11  -5   1   46.47    2.58
  11  -5   1   47.66    2.56
  11   5   1   47.51    2.57
 -11   5  -1   48.04    2.49
  11   5   1   43.64    2.60
 -11   5  -1   49.03    2.88
 -11   5  -1   46.60    2.61
 -12  -5  -1    1.15    0.66
 -12  -5  -1    0.71    0.77
 -12  -5  -1    0.65    0.89
  12  -5   1    0.75    0.59
  12  -5   1    0.40    0.59
  12   5   1   -0.04    0.56
 -12   5  -1    0.93    0.55
 -12   5  -1    0.53    0.72
  12   5   1    0.53    0.63
 -12   5  -1    0.83    0.79
  13  -5   1    3.90    0.86
 -13  -5  -1    5.69    1.11
 -13  -5  -1    4.99    1.23
  13  -5   1    3.83    0.84
  13   5   1    4.38    0.93
 -13   5  -1    4.63    1.37
 -13   5  -1    5.94    0.76
  13   5   1    5.90    0.89
 -13   5  -1    5.21    0.96
  14  -5   1    0.50    0.78
  14  -5   1    0.13    0.70
 -14  -5  -1   -0.31    0.91
 -14  -5  -1   -0.36    1.01
 -14   5  -1    1.28    0.87
  14   5   1    0.26    0.80
  14   5   1    0.24    0.73
  15  -5   1    1.36    0.81
  15  -5   1    4.01    0.99
 -15  -5  -1    4.82    1.18
 -15  -5  -1    2.50    1.38
  15   5   1    5.38    1.10
 -15   5  -1    3.06    1.01
  15   5   1    3.53    0.92
  16  -5   1    1.52    0.94
 -16  -5  -1    1.42    1.06
  16  -5   1    2.07    0.93
 -16   5  -1    1.64    0.94
  16   5   1    1.06    1.02
  16   5   1    2.51    0.98
  17  -5   1   10.40    1.40
 -17  -5  -1    8.05    1.45
  17  -5   1    9.84    1.41
  17   5   1    9.35    1.43
  17   5   1    8.12    1.27
 -17   5  -1    9.98    1.39
  18  -5   1    6.56    1.24
 -18  -5  -1    1.58    1.22
  18   5   1    5.84    1.27
 -18   5  -1    3.69    1.18
 -19  -5  -1    0.90    1.25
  19  -5   1   -0.47    1.06
 -19   5  -1   -1.53    1.04
  19   5   1    1.83    1.16
  19  -6  -1    1.33    1.16
 -19  -6   1   -0.09    1.56
 -19  -6   1   -0.39    1.17
 -19   6   1    0.42    1.04
  19   6  -1    0.84    1.17
 -18  -6   1    5.88    1.29
 -18  -6   1    7.10    1.59
  18  -6  -1    6.49    1.43
  18  -6  -1    6.52    1.29
  18   6  -1    5.49    1.39
  18   6  -1    5.35    1.29
 -18   6   1    4.12    1.12
 -17  -6   1    0.97    1.02
 -17  -6   1    0.44    1.20
  17  -6  -1    0.23    1.00
  17  -6  -1   -0.10    0.97
  17   6  -1    0.48    0.95
 -17   6   1    0.58    0.93
 -17   6   1   -0.55    1.25
  17   6  -1   -0.53    1.01
 -16  -6   1    2.41    1.05
 -16  -6   1    3.34    1.24
  16  -6  -1    1.98    0.91
  16  -6  -1    2.41    1.04
 -16   6   1    1.73    0.92
 -16   6   1    2.82    1.21
  16   6  -1    2.97    0.97
  16   6  -1    3.62    1.11
 -15  -6   1    0.30    1.06
  15  -6  -1    0.82    0.78
  15  -6  -1    1.67    0.81
 -15  -6   1    0.96    0.93
  15   6  -1    1.25    0.80
  15   6  -1   -0.28    0.89
 -15   6   1    1.60    0.84
 -15   6   1    0.54    0.89
  14  -6  -1    1.02    0.72
 -14  -6   1    0.41    0.84
 -14  -6   1    0.28    0.97
  14  -6  -1    0.05    0.69
 -14   6   1    0.78    0.74
  14   6  -1    0.07    0.77
  14   6  -1   -1.25    0.70
 -14   6   1    0.53    0.79
 -13  -6   1    1.31    0.98
  13  -6  -1    3.37    0.74
 -13  -6   1    2.39    0.90
 -13  -6   1    3.74    0.90
  13  -6  -1    2.35    0.75
 -13   6   1    2.70    0.77
  13   6  -1    3.46    0.77
 -13   6   1    2.22    0.86
  13   6  -1    3.14    0.84
  12  -6  -1    1.43    0.59
  12  -6  -1    1.87    0.66
 -12  -6   1    1.13    0.83
 -12  -6   1    0.78    0.78
 -12  -6   1   -0.55    0.68
 -12   6   1    0.46    0.68
 -12   6   1    0.99    0.63
  12   6  -1    0.73    0.65
  12   6  -1    1.11    0.58
 -11  -6   1   24.02    1.88
  11  -6  -1   22.53    1.57
 -11  -6   1   25.66    1.69
  11  -6  -1   23.43    1.52
 -11  -6   1   23.47    1.67
  11   6  -1   23.56    1.59
  11   6  -1   25.56    1.54
 -11   6   1   25.46    1.75
  11   6  -1   24.35    1.66
  11   6  -1   27.08    1.91
 -11   6   1   23.38    1.56
 -10  -6   1    3.26    0.79
  10  -6  -1    3.14    0.52
 -10  -6   1    3.24    0.70
  10  -6  -1    2.93    0.58
 -10  -6   1    2.29    0.72
 -10   6   1    3.55    0.93
 -10   6   1    4.55    0.53
 -10   6   1    2.84    0.59
  10   6  -1    3.28    0.61
 -10   6   1    3.49    0.71
  10   6  -1    3.66    0.62
  10   6  -1    4.32    0.59
  10   6  -1    2.74    0.59
   9  -6  -1    9.11    0.80
   9  -6  -1   10.03    0.91
  -9  -6   1   10.54    0.98
  -9  -6   1   11.33    1.02
  -9  -6   1    9.35    1.09
   9  -6  -1    9.92    0.87
   9   6  -1   10.43    0.88
  -9   6   1   10.20    1.19
  -9   6   1   11.09    0.99
   9   6  -1   10.28    0.91
   9   6  -1   11.61    0.93
  -9   6   1   12.16    0.82
   9   6  -1   10.42    0.84
  -9   6   1   10.83    0.86
   8  -6  -1   16.58    1.08
  -8  -6   1   15.11    1.14
  -8  -6   1   15.23    1.17
  -8  -6   1   16.74    1.34
   8  -6  -1   16.08    1.09
   8  -6  -1   16.17    1.01
  -8   6   1   16.99    1.06
  -8   6   1   17.25    1.41
  -8   6   1   16.45    1.01
   8   6  -1   17.28    1.04
   8   6  -1   16.03    1.07
  -8   6   1   17.11    1.19
   8   6  -1   16.27    1.08
   8   6  -1   15.50    1.10
  -7  -6   1    0.95    0.30
  -7  -6   1    1.53    0.51
   7  -6  -1    1.30    0.37
   7  -6  -1    1.68    0.32
  -7  -6   1    0.70    0.40
  -7  -6   1    1.14    0.44
  -7  -6   1    1.07    0.44
   7  -6  -1    1.53    0.38
   7   6  -1    1.03    0.36
  -7   6   1    1.99    0.39
  -7   6   1    1.34    0.33
   7   6  -1    1.51    0.38
   7   6  -1    0.88    0.35
   7   6  -1    1.82    0.35
  -7   6   1    1.85    0.45
   6  -6  -1   63.29    3.06
   6  -6  -1   64.91    3.12
  -6  -6   1   57.86    3.13
   6  -6  -1   63.23    3.12
   6  -6  -1   60.80    3.11
  -6  -6   1   60.24    3.18
  -6  -6   1   61.90    3.17
  -6  -6   1   63.87    3.31
   6   6  -1   63.04    3.09
  -6   6   1   72.81    3.24
   6   6  -1   63.07    3.10
  -6   6   1   65.08    3.09
  -6   6   1   62.53    3.08
   6   6  -1   59.66    3.11
  -6   6   1   63.04    3.25
  -5  -6   1    0.68    0.40
   5  -6  -1    1.22    0.31
  -5  -6   1    1.39    0.37
  -5  -6   1    1.21    0.34
   5  -6  -1    1.49    0.25
   5  -6  -1    1.49    0.33
  -5  -6   1    0.84    0.27
   5  -6  -1    1.63    0.31
   5  -6  -1    1.24    0.27
  -5  -6   1    1.27    0.41
   5   6  -1    0.70    0.28
  -5   6   1    0.97    0.28
   5   6  -1    0.81    0.27
  -5   6   1    1.26    0.34
  -5   6   1    1.18    0.28
  -5   6   1    1.83    0.44
   5   6  -1    1.08    0.28
   4  -6  -1  109.61    5.33
   4  -6  -1  110.59    5.28
  -4  -6   1  118.75    5.43
   4  -6  -1  110.36    5.28
  -4  -6   1  102.00    5.28
   4  -6  -1  113.54    5.24
  -4  -6   1  110.94    5.31
   4  -6  -1  110.40    5.25
  -4  -6   1  106.88    5.26
  -4   6   1  108.40    5.27
  -4   6   1  123.91    5.36
   4   6  -1  112.83    5.27
   4   6  -1  108.98    5.28
  -4   6   1  112.63    5.36
   4   6  -1  109.87    5.26
   4   6  -1  104.46    5.26
  -4   6   1  112.24    5.22
  -4   6   1  113.24    5.25
  -3  -6   1   86.19    4.30
  -3  -6   1   86.56    4.30
   3  -6  -1   97.06    4.29
   3  -6  -1   95.40    4.29
  -3  -6   1   89.21    4.32
  -3  -6   1   99.49    4.43
   3  -6  -1   91.82    4.31
   3  -6  -1   89.50    4.31
   3   6  -1   89.03    4.29
  -3   6   1   93.58    4.27
  -3   6   1   90.77    4.28
   3   6  -1   88.25    4.31
   3   6  -1   81.21    4.32
  -3   6   1   89.26    4.37
   2  -6  -1  119.64    5.28
   2  -6  -1  112.01    5.30
   2  -6  -1  116.10    5.28
  -2  -6   1  111.35    5.30
   2  -6  -1  112.57    5.30
   2  -6  -1  114.01    5.33
  -2   6   1  113.64    5.28
   2   6  -1  108.20    5.29
  -2   6   1  112.40    5.34
   2   6  -1  112.73    5.30
   2   6  -1  105.95    5.28
  -2   6   1  108.97    5.29
   1  -6  -1    0.64    0.20
   1  -6  -1    0.55    0.19
  -1  -6   1    0.57    0.19
   1  -6  -1    0.56    0.18
   1  -6  -1    0.69    0.16
   1   6  -1    0.38    0.16
   1   6  -1    0.27    0.15
   1   6  -1    0.26    0.17
  -1   6   1    0.51    0.16
   1   6  -1    0.64    0.17
   1   6  -1    0.59    0.17
  -1   6   1    0.40    0.18
  -1   6   1    0.14    0.18
   0  -6   1    2.19    0.25
   0  -6  -1    2.12    0.22
   0  -6  -1    2.06    0.26
   0  -6   1    1.79    0.23
   0  -6  -1    2.27    0.24
   0  -6  -1    1.77    0.24
   0   6   1    2.05    0.23
   0   6   1    1.89    0.23
   0   6  -1    1.97    0.24
   0   6   1    1.96    0.24
   0   6   1    1.75    0.28
   0   6  -1    2.16    0.23
   0   6   1    1.78    0.23
   0   6  -1    1.60    0.21
   0   6  -1    1.70    0.22
  -1  -6  -1  361.81   16.96
  -1  -6  -1  372.21   16.99
   1  -6   1  359.77   16.96
   1  -6   1  349.04   16.97
  -1  -6  -1  371.59   16.99
  -1  -6  -1  370.53   16.96
   1  -6   1  366.03   16.97
   1  -6   1  357.21   16.96
  -1   6  -1  349.47   16.96
  -1   6  -1  355.28   16.96
  -1   6  -1  377.94   17.00
  -1   6  -1  353.13   16.96
   1   6   1  378.22   16.99
   1   6   1  351.70   16.97
  -1   6  -1  371.52   17.01
   1   6   1  363.23   16.97
   1   6   1  368.94   16.97
   1   6   1  377.50   17.03
  -2  -6  -1   64.30    3.06
  -2  -6  -1   62.39    3.01
  -2  -6  -1   64.69    3.06
  -2  -6  -1   65.33    3.02
  -2  -6  -1   62.83    3.07
   2  -6   1   65.38    3.04
   2  -6   1   65.49    3.03
   2  -6   1   59.66    3.03
   2  -6   1   63.64    3.02
   2   6   1   62.33    3.03
  -2   6  -1   61.93    3.02
   2   6   1   64.33    3.08
   2   6   1   64.08    3.05
  -2   6  -1   61.92    3.02
   2   6   1   64.25    3.03
  -2   6  -1   61.79    3.04
  -2   6  -1   64.33    3.10
   2   6   1   62.21    3.05
   2   6   1   62.38    3.05
  -3  -6  -1    6.39    0.51
   3  -6   1    5.80    0.49
  -3  -6  -1    6.18    0.44
   3  -6   1    7.11    0.51
   3  -6   1    5.69    0.44
  -3  -6  -1    6.14    0.49
  -3  -6  -1    6.20    0.51
   3  -6   1    5.75    0.49
   3   6   1    6.32    0.47
  -3   6  -1    5.84    0.51
   3   6   1    6.14    0.48
  -3   6  -1    6.39    0.59
  -3   6  -1    6.16    0.46
   3   6   1    5.89    0.51
   3   6   1    6.66    0.55
   3   6   1    6.51    0.49
   3   6   1    5.75    0.50
  -4  -6  -1   43.45    2.18
  -4  -6  -1   43.80    2.20
   4  -6   1   44.75    2.18
  -4  -6  -1   42.32    2.16
  -4  -6  -1   42.83    2.17
  -4  -6  -1   44.98    2.12
   4  -6   1   44.09    2.16
   4  -6   1   42.08    2.17
  -4  -6  -1   46.31    2.39
   4  -6   1   43.07    2.18
  -4  -6  -1   44.45    2.13
   4   6   1   43.70    2.20
   4   6   1   43.21    2.18
  -4   6  -1   42.38    2.13
   4   6   1   42.70    2.19
   4   6   1   44.08    2.16
  -4   6  -1   45.64    2.30
  -4   6  -1   44.36    2.18
   4   6   1   44.05    2.21
   4   6   1   42.56    2.16
  -4   6  -1   39.75    2.15
   5  -6   1    5.52    0.50
   5  -6   1    5.00    0.52
  -5  -6  -1    5.84    0.54
   5  -6   1    5.19    0.50
   5  -6   1    6.45    0.50
  -5  -6  -1    4.73    0.68
  -5  -6  -1    5.35    0.44
  -5  -6  -1    5.88    0.52
  -5   6  -1    5.70    0.53
  -5   6  -1    5.11    0.44
   5   6   1    5.02    0.49
   5   6   1    5.55    0.58
  -5   6  -1    6.12    0.68
   5   6   1    5.01    0.53
   5   6   1    6.08    0.56
   5   6   1    4.90    0.52
  -5   6  -1    5.46    0.51
   6  -6   1    8.72    0.67
   6  -6   1    9.83    0.71
  -6  -6  -1   10.50    1.00
   6  -6   1    9.12    0.72
  -6  -6  -1    8.62    0.62
  -6  -6  -1    8.84    0.81
  -6  -6  -1    8.49    0.72
  -6  -6  -1    9.20    0.67
   6  -6   1    9.25    0.76
   6   6   1    7.85    0.70
   6   6   1    9.25    0.76
   6   6   1    8.93    0.70
  -6   6  -1    9.83    0.71
   6   6   1    8.03    0.73
  -6   6  -1    8.19    0.70
  -6   6  -1    7.54    0.61
   6   6   1    9.44    0.76
  -6   6  -1   10.25    0.85
  -7  -6  -1    8.10    0.61
  -7  -6  -1    8.40    0.72
  -7  -6  -1    9.23    0.67
   7  -6   1    8.16    0.68
   7  -6   1    8.49    0.73
   7  -6   1    8.54    0.74
  -7  -6  -1    8.75    0.99
  -7  -6  -1    8.96    0.83
  -7   6  -1    7.56    0.60
   7   6   1    7.44    0.73
   7   6   1    7.67    0.74
   7   6   1    7.14    0.73
   7   6   1    9.42    0.74
  -7   6  -1    8.22    0.75
  -7   6  -1    7.32    0.82
  -7   6  -1    8.88    0.74
   7   6   1    8.56    0.77
  -7   6  -1    9.49    0.73
  -8  -6  -1    6.63    0.82
  -8  -6  -1    6.39    0.55
   8  -6   1    7.36    0.71
   8  -6   1    5.80    0.62
  -8  -6  -1    5.55    0.87
   8  -6   1    8.10    0.75
  -8  -6  -1    6.44    0.65
  -8   6  -1    7.29    0.86
   8   6   1    5.10    0.71
  -8   6  -1    6.63    0.69
   8   6   1    5.48    0.65
  -8   6  -1    6.44    0.72
  -8   6  -1    6.87    0.65
   8   6   1    7.07    0.70
   8   6   1    6.54    0.71
  -9  -6  -1   -0.24    0.56
  -9  -6  -1    0.10    0.54
  -9  -6  -1   -0.20    0.32
  -9  -6  -1   -0.19    0.40
   9  -6   1    0.84    0.44
   9  -6   1    0.10    0.40
   9   6   1    0.08    0.46
  -9   6  -1   -0.30    0.41
  -9   6  -1   -0.03    0.38
   9   6   1   -0.18    0.45
  -9   6  -1    0.00    0.45
   9   6   1    0.57    0.44
   9   6   1   -0.68    0.38
  -9   6  -1    0.44    0.54
 -10  -6  -1   18.38    1.43
  10  -6   1   18.68    1.27
 -10  -6  -1   18.19    1.09
  10  -6   1   17.76    1.30
 -10  -6  -1   19.62    1.68
  10   6   1   18.95    1.34
 -10   6  -1   16.60    1.27
  10   6   1   18.46    1.29
  10   6   1   18.34    1.39
 -10   6  -1   18.32    1.50
 -10   6  -1   18.07    1.31
 -10   6  -1   19.76    1.25
  11  -6   1    2.21    0.60
 -11  -6  -1    2.71    0.82
 -11  -6  -1    2.56    0.47
 -11  -6  -1    2.93    0.97
  11  -6   1    2.74    0.64
 -11   6  -1    2.96    0.73
 -11   6  -1    1.15    0.74
  11   6   1    1.37    0.66
 -11   6  -1    3.16    0.59
  11   6   1    3.38    0.64
  12  -6   1   10.66    1.06
 -12  -6  -1    9.93    1.40
 -12  -6  -1    8.73    1.21
 -12  -6  -1   10.25    1.19
  12  -6   1   10.14    1.03
  12   6   1    8.61    1.04
 -12   6  -1    9.73    0.91
 -12   6  -1    7.55    1.15
  12   6   1    8.44    0.99
 -12   6  -1    8.70    1.07
 -13  -6  -1    4.34    1.03
  13  -6   1    4.03    0.86
 -13  -6  -1    4.84    1.24
  13  -6   1    4.51    0.86
 -13   6  -1    4.88    0.94
  13   6   1    4.54    0.86
 -13   6  -1    4.60    0.75
  13   6   1    5.18    0.96
  14  -6   1    6.03    0.95
  14  -6   1    7.52    1.02
 -14  -6  -1    5.10    1.17
 -14  -6  -1    4.42    1.34
  14   6   1    6.23    1.13
  14   6   1    6.97    1.03
 -14   6  -1    7.26    1.09
 -15  -6  -1   12.71    2.04
  15  -6   1   13.23    1.37
  15  -6   1   11.96    1.36
 -15  -6  -1    9.05    1.43
 -15   6  -1   12.86    1.40
  15   6   1   16.42    1.45
  15   6   1   11.16    1.39
  16  -6   1   -0.61    0.89
  16  -6   1    1.38    0.93
 -16  -6  -1   -0.23    1.08
  16   6   1    0.30    0.83
 -16   6  -1    1.58    0.96
  16   6   1   -0.32    0.99
  17  -6   1    2.26    1.04
  17  -6   1    2.30    1.06
 -17  -6  -1    1.16    1.13
 -17   6  -1    0.97    1.02
  17   6   1    2.55    1.11
  17   6   1    3.15    1.06
  18  -6   1    1.67    1.09
 -18  -6  -1    0.90    1.18
 -18   6  -1    3.15    1.14
  18   6   1    1.27    1.07
 -19  -6  -1   -1.01    1.18
  19  -6   1   -0.06    1.11
 -19   6  -1    0.17    1.12
  19   6   1    1.80    1.17
 -19  -7   1    2.31    1.69
  19  -7  -1    1.96    1.13
 -19  -7   1   -0.14    1.21
  19   7  -1    1.48    1.19
 -19   7   1    1.88    1.08
 -18  -7   1    2.21    1.41
  18  -7  -1    2.71    1.15
 -18  -7   1    1.00    1.16
  18   7  -1    1.93    1.25
  18   7  -1    2.10    1.12
 -18   7   1   -0.12    0.97
  17  -7  -1    0.37    1.00
 -17  -7   1   -0.62    1.21
 -17  -7   1    0.47    1.05
  17  -7  -1    0.62    1.01
 -17   7   1   -0.05    0.89
 -17   7   1    1.28    1.32
  17   7  -1    1.55    1.02
  17   7  -1   -0.09    1.02
  16  -7  -1    9.78    1.30
  16  -7  -1   10.27    1.33
 -16  -7   1    7.12    1.30
 -16  -7   1   11.23    1.69
 -16   7   1    9.84    1.25
  16   7  -1   10.94    1.37
  16   7  -1    9.74    1.26
  15  -7  -1    9.15    1.17
 -15  -7   1    8.44    1.52
 -15  -7   1    8.80    1.26
  15  -7  -1   13.37    1.33
  15   7  -1    8.13    1.15
  15   7  -1    7.69    1.25
 -15   7   1    9.19    1.16
 -15   7   1    8.13    1.30
  14  -7  -1   11.71    1.24
  14  -7  -1   12.48    1.21
 -14  -7   1   11.91    1.55
 -14  -7   1   11.07    1.39
  14   7  -1   11.83    1.30
  14   7  -1   13.34    1.29
 -14   7   1   12.30    1.25
 -14   7   1   11.15    1.37
 -13  -7   1   17.48    1.53
 -13  -7   1   13.95    1.64
  13  -7  -1   16.20    1.34
 -13  -7   1   16.05    1.49
  13  -7  -1   14.67    1.35
 -13   7   1   18.19    1.36
  13   7  -1   12.79    1.32
 -13   7   1   12.78    1.42
  13   7  -1   14.91    1.32
  12  -7  -1   -0.01    0.60
 -12  -7   1    0.43    0.76
  12  -7  -1    0.68    0.57
 -12  -7   1   -0.15    0.75
 -12  -7   1    0.87    0.75
 -12   7   1    0.95    0.63
 -12   7   1    0.45    0.57
  12   7  -1    0.97    0.57
  12   7  -1    0.18    0.67
  12   7  -1    1.14    0.66
 -12   7   1    0.43    0.67
  11  -7  -1   24.28    1.61
 -11  -7   1   24.55    1.97
 -11  -7   1   28.49    1.81
 -11  -7   1   27.55    1.80
  11  -7  -1   24.50    1.66
 -11   7   1   26.25    1.53
  11   7  -1   27.30    1.64
 -11   7   1   28.70    1.67
  11   7  -1   23.00    1.66
  11   7  -1   26.86    1.75
 -11   7   1   27.20    1.82
  10  -7  -1   31.62    1.81
 -10  -7   1   30.04    2.15
 -10  -7   1   31.46    1.98
  10  -7  -1   31.68    1.87
 -10  -7   1   33.06    1.98
  10   7  -1   29.91    1.82
 -10   7   1   32.08    2.01
  10   7  -1   31.54    1.88
 -10   7   1   33.95    1.85
  10   7  -1   31.19    1.93
  10   7  -1   33.40    1.88
 -10   7   1   35.09    1.79
  -9  -7   1    1.63    0.66
   9  -7  -1    1.26    0.41
   9  -7  -1    1.13    0.47
  -9  -7   1    1.43    0.60
   9  -7  -1    1.75    0.52
  -9  -7   1    1.28    0.60
   9   7  -1    1.56    0.46
   9   7  -1    1.58    0.45
   9   7  -1    1.30    0.46
  -9   7   1    1.63    0.71
   9   7  -1    1.60    0.44
  -9   7   1    1.43    0.46
  -9   7   1    0.95    0.40
  -9   7   1    0.73    0.52
  -8  -7   1   11.65    1.01
  -8  -7   1   11.17    0.99
  -8  -7   1    9.51    0.94
  -8  -7   1    9.15    1.04
   8  -7  -1   10.74    0.89
   8  -7  -1   11.39    0.90
   8  -7  -1   11.71    0.88
   8  -7  -1   10.94    0.81
  -8   7   1   12.34    0.98
   8   7  -1   12.05    0.90
  -8   7   1   10.80    1.14
   8   7  -1   10.96    0.88
  -8   7   1   11.94    0.82
  -8   7   1   11.52    0.84
   8   7  -1   11.14    0.84
   8   7  -1   10.88    0.87
   7  -7  -1   41.94    2.17
  -7  -7   1   41.13    2.25
  -7  -7   1   38.91    2.22
  -7  -7   1   42.28    2.20
  -7  -7   1   40.54    2.38
   7  -7  -1   40.73    2.10
   7  -7  -1   40.42    2.18
   7  -7  -1   43.44    2.16
  -7   7   1   43.24    2.13
   7   7  -1   38.37    2.13
   7   7  -1   40.89    2.09
   7   7  -1   42.04    2.17
   7   7  -1   41.04    2.16
  -7   7   1   42.98    2.13
  -7   7   1   40.09    2.33
  -7   7   1   44.63    2.28
   6  -7  -1    1.80    0.30
  -6  -7   1    1.18    0.31
   6  -7  -1    1.46    0.34
   6  -7  -1    1.28    0.37
   6  -7  -1    1.13    0.38
  -6  -7   1    1.92    0.44
  -6  -7   1    2.15    0.46
  -6  -7   1    1.61    0.50
   6   7  -1    1.28    0.34
  -6   7   1    1.63    0.49
   6   7  -1    0.97    0.34
  -6   7   1    2.10    0.35
  -6   7   1    1.90    0.35
  -6   7   1    1.82    0.41
   6   7  -1    1.68    0.34
   5  -7  -1   -0.11    0.21
   5  -7  -1   -0.04    0.26
  -5  -7   1    0.22    0.31
   5  -7  -1    0.08    0.27
  -5  -7   1   -0.33    0.28
   5  -7  -1    0.06    0.24
   5  -7  -1   -0.04    0.29
  -5  -7   1    0.23    0.38
  -5  -7   1   -0.41    0.22
   5   7  -1   -0.01    0.23
  -5   7   1   -0.47    0.34
   5   7  -1    0.22    0.24
   5   7  -1   -0.20    0.24
  -5   7   1   -0.04    0.27
  -5   7   1   -0.23    0.24
   5   7  -1   -0.02    0.25
  -5   7   1    0.09    0.24
   4  -7  -1    1.54    0.31
  -4  -7   1    2.01    0.42
  -4  -7   1    1.29    0.28
   4  -7  -1    2.07    0.33
   4  -7  -1    1.65    0.25
  -4  -7   1    1.23    0.30
   4  -7  -1    1.30    0.27
  -4  -7   1    1.51    0.32
  -4   7   1    1.87    0.26
  -4   7   1    1.65    0.33
  -4   7   1    1.38    0.39
   4   7  -1    2.15    0.32
   4   7  -1    1.45    0.28
  -4   7   1    1.81    0.30
   4   7  -1    1.82    0.27
  -4   7   1    1.78    0.25
   4   7  -1    1.46    0.29
   3  -7  -1    4.70    0.37
  -3  -7   1    3.84    0.38
   3  -7  -1    4.30    0.36
  -3  -7   1    4.50    0.50
   3  -7  -1    4.45    0.40
   3  -7  -1    4.77    0.41
  -3  -7   1    4.11    0.42
  -3  -7   1    3.61    0.37
   3   7  -1    3.65    0.36
  -3   7   1    4.92    0.35
  -3   7   1    5.23    0.42
  -3   7   1    4.05    0.35
   3   7  -1    3.39    0.36
   3   7  -1    4.29    0.38
  -3   7   1    4.32    0.46
   3   7  -1    4.39    0.39
  -2  -7   1   50.21    2.43
   2  -7  -1   51.51    2.40
  -2  -7   1   56.80    2.53
   2  -7  -1   51.34    2.41
   2  -7  -1   50.69    2.41
   2  -7  -1   49.57    2.45
   2  -7  -1   49.71    2.42
  -2  -7   1   48.89    2.42
  -2   7   1   49.81    2.40
   2   7  -1   47.41    2.41
  -2   7   1   49.16    2.46
   2   7  -1   50.73    2.43
   2   7  -1   49.42    2.41
   2   7  -1   47.67    2.38
  -2   7   1   48.34    2.41
   2   7  -1   47.07    2.41
   1  -7  -1  108.09    4.75
   1  -7  -1  103.81    4.75
  -1  -7   1   93.18    4.73
  -1  -7   1  102.81    4.77
   1  -7  -1  103.64    4.77
   1  -7  -1  103.28    4.76
   1   7  -1   95.28    4.80
  -1   7   1  104.27    4.75
  -1   7   1   99.84    4.76
   1   7  -1  101.95    4.76
   1   7  -1  100.26    4.74
   1   7  -1   97.03    4.74
   1   7  -1   97.19    4.75
  -1   7   1   96.25    4.74
  -1   7   1  103.69    4.77
   1   7  -1  101.19    4.76
   0  -7   1   41.11    1.99
   0  -7  -1   41.69    1.97
   0  -7   1   42.05    1.98
   0  -7   1   38.82    1.96
   0  -7  -1   41.94    1.97
   0  -7  -1   41.91    1.99
   0  -7  -1   41.77    2.00
   0   7   1   43.30    2.05
   0   7   1   37.94    1.97
   0   7  -1   41.49    1.98
   0   7   1   40.65    1.98
   0   7   1   39.37    1.97
   0   7  -1   38.50    1.96
   0   7  -1   40.43    1.97
   0   7   1   41.03    1.99
   0   7  -1   39.61    1.97
   0   7  -1   40.25    1.99
  -1  -7  -1   15.70    0.83
   1  -7   1   15.99    0.86
   1  -7   1   15.10    0.83
  -1  -7  -1   16.41    0.88
   1  -7   1   16.55    0.85
   1  -7   1   15.66    0.86
  -1  -7  -1   15.47    0.84
  -1  -7  -1   16.43    0.89
  -1   7  -1   16.16    0.90
   1   7   1   14.34    0.86
   1   7   1   14.94    0.85
  -1   7  -1   16.35    0.85
  -1   7  -1   15.35    0.86
  -1   7  -1   14.52    0.83
   1   7   1   16.65    0.86
   1   7   1   17.37    0.93
   1   7   1   15.18    0.85
   1   7   1   15.63    0.99
  -1   7  -1   15.88    0.85
   2  -7   1    2.42    0.29
  -2  -7  -1    2.10    0.33
  -2  -7  -1    2.62    0.27
   2  -7   1    2.04    0.26
  -2  -7  -1    2.29    0.26
   2  -7   1    2.08    0.29
  -2  -7  -1    2.22    0.33
   2  -7   1    2.23    0.30
   2   7   1    2.84    0.30
   2   7   1    2.35    0.29
  -2   7  -1    2.78    0.38
  -2   7  -1    2.61    0.28
  -2   7  -1    2.71    0.30
   2   7   1    1.36    0.29
   2   7   1    2.54    0.32
  -2   7  -1    1.85    0.29
   2   7   1    2.70    0.31
   2   7   1    2.78    0.37
   3  -7   1    2.40    0.33
  -3  -7  -1    3.18    0.37
  -3  -7  -1    1.97    0.34
   3  -7   1    2.04    0.32
  -3  -7  -1    3.39    0.40
  -3  -7  -1    2.72    0.29
   3  -7   1    3.47    0.33
   3  -7   1    2.77    0.34
   3   7   1    2.66    0.35
   3   7   1    2.28    0.32
   3   7   1    2.73    0.40
  -3   7  -1    3.13    0.32
  -3   7  -1    2.76    0.42
   3   7   1    2.11    0.32
  -3   7  -1    2.27    0.35
   3   7   1    2.36    0.31
   3   7   1    2.34    0.33
  -4  -7  -1    0.68    0.28
   4  -7   1    1.04    0.29
   4  -7   1    0.94    0.29
  -4  -7  -1    1.19    0.29
  -4  -7  -1    0.81    0.43
   4  -7   1    1.04    0.30
  -4  -7  -1    0.75    0.23
  -4  -7  -1    0.64    0.22
  -4  -7  -1    0.85    0.31
   4  -7   1    1.22    0.26
   4   7   1    0.67    0.28
  -4   7  -1    1.13    0.28
  -4   7  -1    1.03    0.28
  -4   7  -1    0.93    0.37
   4   7   1    0.89    0.33
  -4   7  -1    0.68    0.30
  -4   7  -1    1.02    0.26
   4   7   1    0.92    0.27
   4   7   1    0.64    0.25
   4   7   1    0.93    0.29
   4   7   1    1.19    0.28
  -5  -7  -1    1.80    0.52
  -5  -7  -1    1.00    0.26
   5  -7   1    1.47    0.32
  -5  -7  -1    1.31    0.34
   5  -7   1    1.14    0.29
  -5  -7  -1    1.86    0.36
   5  -7   1    0.92    0.32
  -5  -7  -1    1.19    0.32
   5  -7   1    1.39    0.36
   5   7   1    1.53    0.39
  -5   7  -1    1.22    0.43
   5   7   1    1.16    0.33
   5   7   1    0.99    0.28
   5   7   1    0.74    0.53
  -5   7  -1    1.74    0.30
  -5   7  -1    1.27    0.32
   5   7   1    1.07    0.34
   5   7   1    1.41    0.33
  -5   7  -1    1.43    0.33
  -6  -7  -1    0.26    0.30
   6  -7   1    0.28    0.31
  -6  -7  -1    0.38    0.34
   6  -7   1    0.33    0.28
  -6  -7  -1    0.23    0.25
   6  -7   1    0.73    0.38
  -6  -7  -1    0.11    0.46
  -6  -7  -1    0.43    0.40
   6  -7   1    0.22    0.31
  -6   7  -1    0.15    0.30
   6   7   1    0.15    0.30
   6   7   1    0.44    0.34
   6   7   1    0.38    0.36
  -6   7  -1    0.49    0.41
  -6   7  -1    0.01    0.42
   6   7   1   -0.03    0.33
  -6   7  -1    0.32    0.34
  -6   7  -1    0.63    0.28
   6   7   1    0.26    0.31
   7  -7   1    0.99    0.34
   7  -7   1    0.76    0.41
  -7  -7  -1    0.27    0.35
  -7  -7  -1    0.86    0.34
   7  -7   1    0.15    0.35
  -7  -7  -1    0.93    0.29
  -7  -7  -1    0.69    0.44
  -7  -7  -1    0.56    0.53
  -7   7  -1    0.77    0.38
   7   7   1    0.89    0.38
  -7   7  -1    1.53    0.49
  -7   7  -1    0.45    0.29
   7   7   1    0.62    0.34
   7   7   1    1.02    0.39
  -7   7  -1    0.71    0.37
   7   7   1    1.03    0.42
   7   7   1    0.66    0.37
   8  -7   1    8.55    0.79
  -8  -7  -1    8.24    0.67
  -8  -7  -1    9.59    0.82
   8  -7   1    7.88    0.75
  -8  -7  -1   10.13    0.73
   8  -7   1   10.97    0.89
  -8  -7  -1    9.00    1.10
  -8  -7  -1    9.70    0.96
  -8   7  -1    9.85    0.97
   8   7   1    8.94    0.81
   8   7   1    8.95    0.85
   8   7   1    8.06    0.76
  -8   7  -1    9.63    0.84
  -8   7  -1    8.90    0.67
   8   7   1    8.25    0.85
  -8   7  -1    8.52    0.82
  -8   7  -1    8.22    0.75
   8   7   1    9.62    0.86
  -9  -7  -1    1.27    0.37
   9  -7   1    1.98    0.56
  -9  -7  -1    1.55    0.62
   9  -7   1    2.21    0.50
  -9  -7  -1    1.10    0.70
  -9  -7  -1    1.19    0.47
   9  -7   1    2.22    0.48
  -9   7  -1    1.61    0.56
   9   7   1    1.71    0.53
  -9   7  -1    2.31    0.53
   9   7   1    1.45    0.48
   9   7   1    1.94    0.53
  -9   7  -1    1.91    0.46
   9   7   1    0.80    0.48
  -9   7  -1    1.92    0.53
 -10  -7  -1   16.63    1.17
  10  -7   1   15.39    1.23
 -10  -7  -1   15.22    1.59
 -10  -7  -1   17.00    1.01
 -10  -7  -1   17.14    1.39
  10  -7   1   16.01    1.19
  10  -7   1   18.22    1.29
  10   7   1   16.68    1.26
  10   7   1   16.47    1.32
 -10   7  -1   15.60    1.40
 -10   7  -1   15.52    1.22
  10   7   1   15.95    1.20
 -10   7  -1   16.57    1.24
 -10   7  -1   16.40    1.18
 -11  -7  -1    0.47    0.76
  11  -7   1    0.62    0.54
  11  -7   1    0.78    0.61
 -11  -7  -1    0.23    0.81
  11  -7   1    0.33    0.56
  11   7   1    1.16    0.58
 -11   7  -1    0.94    0.63
 -11   7  -1    1.15    0.70
 -11   7  -1    1.36    0.56
  11   7   1   -0.01    0.59
  12  -7   1    1.10    0.63
 -12  -7  -1   -0.03    0.79
  12  -7   1    0.01    0.62
 -12  -7  -1   -0.21    0.84
  12   7   1   -0.24    0.60
 -12   7  -1    0.38    0.93
  12   7   1    0.85    0.67
 -12   7  -1    1.22    0.71
 -12   7  -1    0.09    0.54
  13  -7   1    0.66    0.69
 -13  -7  -1   -1.01    0.84
  13  -7   1   -0.59    0.64
 -13  -7  -1   -0.57    0.93
  13   7   1   -1.19    0.62
 -13   7  -1   -0.49    0.73
 -13   7  -1   -0.64    0.58
  13   7   1   -1.06    0.67
 -14  -7  -1   -0.61    1.04
 -14  -7  -1   -1.03    0.89
  14  -7   1    0.82    0.79
  14  -7   1   -0.57    0.68
  14   7   1    0.86    0.83
  14   7   1    0.17    0.74
 -14   7  -1    0.56    0.77
  15  -7   1    1.48    0.88
 -15  -7  -1   -0.71    1.03
 -15  -7  -1   -0.15    1.45
  15  -7   1    1.79    0.89
 -15   7  -1    1.29    0.88
  15   7   1    0.36    0.78
  15   7   1   -0.21    0.91
  16  -7   1    0.78    0.87
  16  -7   1   -0.11    0.92
 -16  -7  -1   -0.38    1.10
  16   7   1   -1.26    0.77
 -16   7  -1   -1.62    0.84
  16   7   1    0.95    1.03
 -17  -7  -1    1.26    1.18
  17  -7   1    2.14    1.12
  17  -7   1    2.72    1.08
 -17   7  -1    4.06    1.11
  17   7   1    3.53    1.08
  17   7   1    2.34    1.10
  18  -7   1    2.07    1.17
 -18  -7  -1   -0.29    1.16
  18   7   1    1.38    1.06
 -18   7  -1    1.12    1.06
 -19  -7  -1   -0.22    1.23
  19  -7   1    0.57    1.10
 -19   7  -1    0.78    1.16
  19   7   1    0.19    1.16
 -19  -8   1    6.50    1.97
 -19  -8   1    1.55    1.37
  19  -8  -1    4.42    1.27
 -19   8   1    4.07    1.17
  19   8  -1    4.67    1.30
  18  -8  -1    1.80    1.16
 -18  -8   1    1.29    1.20
 -18  -8   1    3.24    1.42
 -18   8   1    3.10    1.10
  18   8  -1    2.29    1.13
  18   8  -1    5.10    1.55
 -17  -8   1    0.97    1.32
 -17  -8   1   -0.41    1.04
  17  -8  -1    1.63    1.06
  17  -8  -1    4.10    1.10
 -17   8   1   -1.08    1.23
  17   8  -1    3.49    1.08
  17   8  -1    2.59    1.15
 -17   8   1    0.76    0.93
  16  -8  -1    1.55    0.94
  16  -8  -1    1.64    0.98
 -16  -8   1    0.85    1.21
 -16  -8   1    1.54    1.02
 -16   8   1    0.47    0.85
  16   8  -1    0.76    0.86
  16   8  -1    1.58    0.97
 -15  -8   1    2.18    1.17
 -15  -8   1    2.56    1.04
  15  -8  -1    0.79    0.82
  15  -8  -1    2.37    0.88
  15   8  -1    1.46    0.93
  15   8  -1    1.23    0.83
 -15   8   1    0.75    0.81
  14  -8  -1    4.49    0.92
 -14  -8   1    3.65    1.16
 -14  -8   1    4.53    1.07
  14  -8  -1    5.84    0.96
  14   8  -1    4.60    1.01
  14   8  -1    5.48    0.92
 -14   8   1    5.22    0.94
 -14   8   1    5.97    1.07
 -13  -8   1    8.94    1.20
  13  -8  -1    7.17    0.95
 -13  -8   1    6.20    1.11
 -13  -8   1    5.64    1.20
  13  -8  -1    5.30    0.88
 -13   8   1    6.72    1.07
  13   8  -1    5.67    0.99
 -13   8   1    7.07    0.92
  13   8  -1    5.67    0.91
 -12  -8   1    4.73    1.12
 -12  -8   1    4.60    0.99
 -12  -8   1    8.40    1.07
  12  -8  -1    6.10    0.86
  12  -8  -1    6.77    0.83
  12   8  -1    7.45    0.95
 -12   8   1    6.12    0.97
  12   8  -1    5.79    0.84
 -12   8   1    6.63    0.86
  12   8  -1    5.32    0.88
 -11  -8   1   -0.68    0.70
 -11  -8   1   -0.13    0.68
  11  -8  -1    0.15    0.53
  11  -8  -1    0.16    0.49
 -11  -8   1    0.53    0.70
 -11   8   1    0.02    0.58
 -11   8   1    0.06    0.54
  11   8  -1   -0.61    0.49
  11   8  -1    0.26    0.55
 -11   8   1    0.94    0.48
  11   8  -1   -0.35    0.54
  10  -8  -1    5.39    0.70
 -10  -8   1    5.72    0.85
  10  -8  -1    4.05    0.70
 -10  -8   1    4.05    0.86
 -10  -8   1    4.67    0.84
  10  -8  -1    4.43    0.62
 -10   8   1    5.14    0.63
 -10   8   1    5.20    0.80
 -10   8   1    5.16    0.70
  10   8  -1    4.58    0.70
  10   8  -1    4.83    0.64
  10   8  -1    5.70    0.73
  10   8  -1    5.90    0.74
  -9  -8   1    3.77    0.82
   9  -8  -1    2.60    0.58
   9  -8  -1    2.56    0.48
  -9  -8   1    2.33    0.65
   9  -8  -1    2.46    0.58
   9  -8  -1    2.32    0.52
  -9  -8   1    1.77    0.65
  -9   8   1    1.88    0.50
   9   8  -1    3.27    0.55
  -9   8   1    2.58    0.57
  -9   8   1    3.50    0.84
   9   8  -1    1.72    0.46
   9   8  -1    1.72    0.51
   9   8  -1    2.52    0.54
  -9   8   1    2.75    0.48
   8  -8  -1    7.42    0.65
  -8  -8   1    7.00    0.79
   8  -8  -1    7.63    0.74
  -8  -8   1    7.24    0.91
  -8  -8   1    7.00    0.80
   8  -8  -1    7.51    0.71
   8  -8  -1    7.51    0.73
  -8   8   1    7.03    0.93
   8   8  -1    5.59    0.66
   8   8  -1    5.55    0.61
  -8   8   1    6.62    0.63
  -8   8   1    7.01    0.67
   8   8  -1    6.95    0.66
   8   8  -1    7.77    0.72
  -8   8   1    7.24    0.78
   7  -8  -1    4.57    0.48
  -7  -8   1    3.60    0.69
   7  -8  -1    3.81    0.51
  -7  -8   1    4.23    0.60
   7  -8  -1    4.22    0.54
  -7  -8   1    3.62    0.57
   7  -8  -1    4.26    0.55
  -7   8   1    4.43    0.70
   7   8  -1    3.48    0.49
   7   8  -1    3.45    0.43
   7   8  -1    4.52    0.50
  -7   8   1    3.91    0.48
  -7   8   1    3.86    0.49
  -7   8   1    4.70    0.58
   7   8  -1    3.97    0.51
   6  -8  -1   -0.07    0.30
   6  -8  -1    0.32    0.32
  -6  -8   1    0.49    0.29
   6  -8  -1   -0.06    0.32
  -6  -8   1    0.29    0.35
  -6  -8   1    0.59    0.45
   6  -8  -1    0.32    0.25
  -6  -8   1    0.23    0.37
   6   8  -1    0.52    0.31
  -6   8   1    0.36    0.30
   6   8  -1    0.84    0.30
  -6   8   1   -0.18    0.31
   6   8  -1    0.39    0.30
  -6   8   1    0.00    0.40
  -6   8   1    0.00    0.27
   6   8  -1    0.38    0.32
   5  -8  -1    1.11    0.30
  -5  -8   1    0.77    0.30
  -5  -8   1    0.22    0.33
   5  -8  -1    0.87    0.31
   5  -8  -1    0.54    0.25
  -5  -8   1    0.98    0.41
  -5  -8   1    0.95    0.35
   5  -8  -1    0.64    0.32
   5   8  -1    0.89    0.29
  -5   8   1    0.60    0.23
   5   8  -1    0.85    0.28
  -5   8   1    1.05    0.33
  -5   8   1    0.90    0.29
   5   8  -1    1.20    0.33
   5   8  -1    0.98    0.30
  -5   8   1    0.28    0.25
  -5   8   1    1.32    0.42
   4  -8  -1    0.63    0.30
  -4  -8   1    0.94    0.19
   4  -8  -1    1.15    0.24
  -4  -8   1    1.16    0.29
   4  -8  -1    1.01    0.29
  -4  -8   1    1.17    0.40
   4  -8  -1    0.79    0.27
  -4  -8   1    0.61    0.30
  -4  -8   1    0.74    0.29
  -4   8   1    0.66    0.22
   4   8  -1    1.12    0.29
  -4   8   1    0.73    0.23
  -4   8   1    0.84    0.36
   4   8  -1    0.92    0.32
   4   8  -1    1.14    0.23
   4   8  -1    1.06    0.27
  -4   8   1    0.96    0.30
   4   8  -1    1.01    0.26
   4   8  -1    1.05    0.31
  -3  -8   1   65.74    3.06
   3  -8  -1   65.96    3.02
  -3  -8   1   71.00    3.19
  -3  -8   1   62.73    3.05
  -3  -8   1   58.29    2.97
  -3  -8   1   57.56    3.02
   3  -8  -1   64.10    3.05
   3  -8  -1   60.27    3.04
   3  -8  -1   63.75    3.02
   3   8  -1   63.65    3.04
   3   8  -1   60.71    2.99
  -3   8   1   60.35    3.04
   3   8  -1   67.90    3.06
  -3   8   1   64.33    3.11
  -3   8   1   64.20    3.01
   3   8  -1   57.69    3.03
   3   8  -1   61.42    3.03
   2  -8  -1  139.89    6.71
   2  -8  -1  149.38    6.66
  -2  -8   1  160.02    6.80
   2  -8  -1  138.59    6.66
  -2  -8   1  144.54    6.68
   2  -8  -1  145.93    6.66
   2  -8  -1  136.78    6.68
  -2  -8   1  136.21    6.63
  -2  -8   1  144.68    6.69
   2   8  -1  134.57    6.67
   2   8  -1  145.84    6.69
  -2   8   1  143.08    6.73
  -2   8   1  138.83    6.67
   2   8  -1  140.56    6.67
  -2   8   1  137.89    6.65
   2   8  -1  139.88    6.67
  -2   8   1  140.13    6.65
   2   8  -1  133.06    6.64
   1  -8  -1   38.84    1.81
   1  -8  -1   37.60    1.82
   1  -8  -1   39.12    1.82
   1  -8  -1   38.59    1.84
  -1  -8   1   37.70    1.84
  -1  -8   1   36.55    1.80
  -1  -8   1   37.49    1.82
  -1  -8   1   36.78    1.79
  -1   8   1   35.74    1.82
   1   8  -1   34.81    1.93
   1   8  -1   38.87    1.83
  -1   8   1   37.69    1.82
   1   8  -1   34.58    1.82
  -1   8   1   34.95    1.80
  -1   8   1   37.94    1.81
   1   8  -1   36.81    1.80
   1   8  -1   34.90    1.80
   1   8  -1   35.17    1.81
   0  -8  -1  124.99    5.70
   0  -8  -1  121.63    5.68
   0  -8   1  114.52    5.66
   0  -8   1  116.97    5.68
   0  -8   1  121.87    5.70
   0  -8  -1  121.68    5.71
   0  -8  -1  122.17    5.67
   0   8   1  112.23    5.67
   0   8   1  123.61    5.68
   0   8  -1  124.40    5.69
   0   8  -1  119.90    5.67
   0   8   1  124.54    5.76
   0   8  -1  118.35    5.67
   0   8   1  119.10    5.68
   0   8   1  123.80    5.70
   0   8  -1  122.76    5.70
   0   8  -1  117.16    5.67
   1  -8   1    2.69    0.29
   1  -8   1    2.74    0.32
  -1  -8  -1    2.04    0.32
   1  -8   1    1.91    0.29
  -1  -8  -1    1.93    0.31
  -1  -8  -1    2.60    0.28
   1  -8   1    1.96    0.26
  -1  -8  -1    2.45    0.26
   1   8   1    2.46    0.30
   1   8   1    2.63    0.38
   1   8   1    2.27    0.30
  -1   8  -1    2.17    0.28
  -1   8  -1    2.45    0.28
  -1   8  -1    2.31    0.33
   1   8   1    2.40    0.29
  -1   8  -1    1.83    0.28
   1   8   1    2.63    0.32
   1   8   1    2.44    0.29
  -1   8  -1    2.71    0.32
  -2  -8  -1   32.35    1.53
   2  -8   1   29.25    1.56
  -2  -8  -1   30.04    1.52
   2  -8   1   29.09    1.53
  -2  -8  -1   29.90    1.58
   2  -8   1   30.76    1.53
   2  -8   1   32.01    1.56
  -2  -8  -1   30.70    1.59
  -2   8  -1   30.81    1.54
   2   8   1   32.85    1.56
   2   8   1   30.89    1.55
   2   8   1   30.28    1.56
   2   8   1   30.65    1.62
  -2   8  -1   31.32    1.63
  -2   8  -1   29.73    1.55
  -2   8  -1   29.05    1.53
   2   8   1   31.89    1.57
   2   8   1   29.59    1.57
   3  -8   1    2.53    0.35
   3  -8   1    2.64    0.34
  -3  -8  -1    2.56    0.37
  -3  -8  -1    2.36    0.28
   3  -8   1    2.74    0.31
   3  -8   1    2.64    0.34
  -3  -8  -1    2.42    0.37
  -3   8  -1    3.03    0.33
  -3   8  -1    2.38    0.42
   3   8   1    2.69    0.33
   3   8   1    2.17    0.32
  -3   8  -1    2.53    0.36
   3   8   1    2.41    0.35
   3   8   1    2.55    0.35
   3   8   1    2.54    0.33
   3   8   1    2.37    0.41
   4  -8   1   15.45    0.91
   4  -8   1   14.86    0.94
  -4  -8  -1   16.06    1.16
  -4  -8  -1   15.78    0.92
  -4  -8  -1   15.36    0.87
  -4  -8  -1   16.74    0.95
  -4  -8  -1   15.00    0.94
  -4  -8  -1   16.15    0.99
   4  -8   1   16.20    0.95
  -4  -8  -1   16.05    0.86
   4  -8   1   15.58    0.94
  -4   8  -1   15.57    0.89
  -4   8  -1   15.84    1.07
   4   8   1   16.65    0.96
   4   8   1   15.25    1.00
   4   8   1   16.36    0.95
   4   8   1   14.24    0.92
   4   8   1   15.13    0.92
  -4   8  -1   15.44    0.97
   4   8   1   14.67    0.95
  -4   8  -1   16.98    0.91
   5  -8   1   13.68    0.91
   5  -8   1   15.76    0.92
  -5  -8  -1   13.50    0.81
  -5  -8  -1   14.12    0.89
   5  -8   1   15.38    0.88
  -5  -8  -1   14.52    0.94
  -5  -8  -1   12.71    0.96
  -5  -8  -1   13.90    1.14
   5  -8   1   13.57    0.91
  -5  -8  -1   12.70    0.89
   5   8   1   14.02    0.87
  -5   8  -1   15.09    1.07
  -5   8  -1   14.24    0.86
   5   8   1   15.41    0.96
   5   8   1   14.24    0.95
   5   8   1   13.07    0.89
  -5   8  -1   13.61    0.89
   5   8   1   14.21    0.91
   5   8   1   14.44    0.93
  -5   8  -1   14.27    0.84
   6  -8   1    7.26    0.65
   6  -8   1    6.63    0.63
  -6  -8  -1    6.40    0.53
  -6  -8  -1    7.24    0.88
  -6  -8  -1    7.07    0.74
   6  -8   1    5.67    0.57
  -6  -8  -1    6.98    0.65
  -6  -8  -1    6.38    0.62
   6  -8   1    7.31    0.64
  -6   8  -1    7.17    0.61
  -6   8  -1    7.31    0.64
  -6   8  -1    7.14    0.57
   6   8   1    7.25    0.62
   6   8   1    7.19    0.68
   6   8   1    6.72    0.63
  -6   8  -1    7.22    0.75
   6   8   1    7.16    0.67
   6   8   1    7.71    0.71
  -6   8  -1    6.33    0.77
  -7  -8  -1    0.65    0.46
   7  -8   1    0.25    0.40
  -7  -8  -1    1.18    0.59
  -7  -8  -1    0.23    0.28
  -7  -8  -1    0.56    0.37
   7  -8   1    0.11    0.32
  -7  -8  -1    0.46    0.33
   7  -8   1    0.61    0.36
   7   8   1    0.26    0.43
   7   8   1    0.78    0.37
  -7   8  -1    0.45    0.36
  -7   8  -1    0.85    0.38
  -7   8  -1    0.72    0.45
   7   8   1    0.51    0.38
   7   8   1    0.90    0.40
  -7   8  -1   -0.15    0.28
  -7   8  -1   -0.50    0.49
   7   8   1    0.09    0.36
  -8  -8  -1    8.26    0.68
  -8  -8  -1    9.21    0.80
  -8  -8  -1    8.20    1.06
  -8  -8  -1    9.07    0.76
   8  -8   1    8.34    0.80
  -8  -8  -1    9.34    0.95
   8  -8   1   10.01    0.82
   8  -8   1    9.29    0.85
  -8   8  -1    8.51    0.67
  -8   8  -1   10.07    0.82
  -8   8  -1    8.48    0.79
   8   8   1   10.17    0.90
  -8   8  -1    9.10    0.96
   8   8   1   10.33    0.90
   8   8   1    9.87    0.89
   8   8   1    8.69    0.84
   8   8   1    9.75    0.83
   9  -8   1   -0.78    0.46
   9  -8   1   -0.81    0.40
  -9  -8  -1   -0.30    0.56
  -9  -8  -1   -0.67    0.41
  -9  -8  -1   -0.27    0.63
  -9  -8  -1   -0.31    0.32
  -9  -8  -1    0.10    0.37
   9  -8   1   -0.51    0.40
  -9   8  -1   -0.65    0.47
  -9   8  -1   -0.49    0.44
   9   8   1   -0.51    0.40
   9   8   1    0.35    0.44
   9   8   1   -0.19    0.50
   9   8   1   -0.56    0.43
  -9   8  -1   -0.47    0.46
  -9   8  -1   -0.47    0.40
  10  -8   1   17.62    1.26
 -10  -8  -1   16.71    1.07
 -10  -8  -1   19.11    1.47
 -10  -8  -1   16.52    1.65
  10  -8   1   16.17    1.30
 -10  -8  -1   21.13    1.29
  10  -8   1   18.76    1.38
  10   8   1   16.36    1.32
 -10   8  -1   17.37    1.33
 -10   8  -1   17.70    1.48
  10   8   1   19.89    1.41
 -10   8  -1   19.59    1.32
 -10   8  -1   18.86    1.26
  10   8   1   17.80    1.29
  11  -8   1   28.96    1.85
 -11  -8  -1   30.55    2.02
 -11  -8  -1   30.82    2.01
  11  -8   1   28.78    1.88
 -11  -8  -1   29.08    2.27
  11  -8   1   31.93    1.98
  11   8   1   30.91    2.02
 -11   8  -1   30.33    2.08
 -11   8  -1   33.61    1.85
  11   8   1   30.33    1.87
 -11   8  -1   30.52    1.88
  11   8   1   28.67    1.93
  12  -8   1   -0.61    0.57
 -12  -8  -1   -1.29    0.81
  12  -8   1   -0.24    0.60
 -12  -8  -1   -0.20    0.89
 -12   8  -1   -0.58    0.55
  12   8   1    0.19    0.60
 -12   8  -1   -1.60    0.62
  12   8   1    0.20    0.67
  13  -8   1    4.98    0.88
  13  -8   1    4.97    0.89
 -13  -8  -1    3.50    1.07
 -13  -8  -1    5.15    1.28
 -13   8  -1    4.93    0.91
 -13   8  -1    5.52    0.83
  13   8   1    3.74    0.85
  13   8   1    3.80    0.92
  14  -8   1    8.37    1.14
 -14  -8  -1    8.58    1.54
  14  -8   1    8.56    1.11
 -14  -8  -1    9.27    1.39
  14   8   1    7.41    1.19
 -14   8  -1    8.77    1.14
  14   8   1    8.15    1.07
 -15  -8  -1   -0.43    1.06
  15  -8   1    1.27    0.89
  15  -8   1   -0.65    0.82
 -15   8  -1    0.66    0.84
  15   8   1    0.23    0.81
  15   8   1   -0.36    0.87
  16  -8   1    0.97    0.93
  16  -8   1   -1.06    0.86
 -16  -8  -1    0.23    1.13
 -16   8  -1   -0.44    0.88
  16   8   1    0.51    0.89
  16   8   1    0.48    1.02
 -17  -8  -1    0.44    1.20
  17  -8   1    0.61    1.00
  17  -8   1   -0.11    0.97
 -17   8  -1   -0.01    0.98
  17   8   1    0.77    0.97
  17   8   1    1.60    1.14
  18  -8   1    4.93    1.26
 -18  -8  -1    6.86    1.43
 -18   8  -1    5.09    1.21
  18   8   1    7.16    1.40
  18   8   1    5.85    1.16
  19  -8   1    1.44    1.22
 -19  -8  -1    0.28    1.32
  19   8   1    2.22    1.24
  19   8   1    0.99    1.01
 -19   8  -1    1.76    1.15
  19  -9  -1    8.88    1.50
 -19  -9   1    4.96    2.07
 -19  -9   1    4.10    1.41
  19   9  -1    6.86    1.38
 -19   9   1    5.41    1.23
 -18  -9   1    0.71    1.35
  18  -9  -1    0.14    1.09
 -18  -9   1   -1.21    1.11
 -18   9   1   -0.29    0.92
  18   9  -1    0.17    1.03
  17  -9  -1    0.30    0.92
  17  -9  -1    0.61    0.94
 -17  -9   1    0.11    1.14
 -17  -9   1    0.62    1.29
 -17   9   1   -1.06    0.88
  17   9  -1    0.81    1.01
  17   9  -1    0.01    1.17
 -16  -9   1   -0.16    1.13
 -16  -9   1    0.56    1.06
  16  -9  -1    0.35    0.89
  16  -9  -1    0.76    0.87
 -16   9   1   -0.22    0.82
  16   9  -1   -0.29    0.90
  16   9  -1   -0.31    0.97
  15  -9  -1    5.84    1.05
 -15  -9   1    4.58    1.13
 -15  -9   1    4.82    1.35
  15  -9  -1    7.28    1.08
 -15   9   1    6.09    0.99
  15   9  -1    4.63    1.10
  15   9  -1    5.81    1.05
  14  -9  -1    3.44    0.86
 -14  -9   1    5.55    1.32
  14  -9  -1    3.09    0.85
 -14  -9   1    3.96    1.07
 -14   9   1    4.72    0.90
  14   9  -1    3.85    0.88
  14   9  -1    4.75    1.02
  13  -9  -1    0.84    0.65
 -13  -9   1    0.80    1.01
  13  -9  -1    0.69    0.65
 -13  -9   1    0.56    0.84
  13   9  -1    0.00    0.77
 -13   9   1    1.16    0.71
  13   9  -1   -1.24    0.85
  13   9  -1    0.37    0.68
 -13   9   1    1.56    0.76
  12  -9  -1   27.08    1.80
  12  -9  -1   27.28    1.77
 -12  -9   1   23.24    2.14
 -12  -9   1   27.30    1.92
 -12   9   1   28.79    1.77
  12   9  -1   28.74    1.93
  12   9  -1   30.10    1.90
 -12   9   1   27.10    1.96
 -12   9   1   30.96    1.70
  12   9  -1   27.55    1.80
 -11  -9   1    7.46    1.17
  11  -9  -1    7.20    0.87
  11  -9  -1    6.45    0.81
 -11  -9   1    8.18    1.05
 -11   9   1    9.49    0.90
 -11   9   1    5.91    0.92
  11   9  -1    9.21    1.00
  11   9  -1    6.71    0.88
  11   9  -1    7.53    0.84
 -11   9   1    8.41    0.81
 -10  -9   1    1.72    0.75
  10  -9  -1    1.56    0.54
  10  -9  -1    0.76    0.48
 -10  -9   1   -0.30    0.61
  10  -9  -1    1.27    0.60
  10   9  -1    0.61    0.55
 -10   9   1    1.10    0.50
 -10   9   1    0.95    0.47
  10   9  -1    0.18    0.46
  10   9  -1    1.30    0.55
 -10   9   1    1.12    0.56
  10   9  -1    1.92    0.58
   9  -9  -1   -0.03    0.39
  -9  -9   1   -0.01    0.57
  -9  -9   1    0.64    0.62
   9  -9  -1    1.13    0.47
   9  -9  -1   -0.05    0.49
   9   9  -1    0.67    0.49
  -9   9   1    0.40    0.49
  -9   9   1    0.50    0.43
   9   9  -1    1.03    0.48
   9   9  -1    0.77    0.47
  -9   9   1    0.12    0.41
   9   9  -1    1.06    0.43
   8  -9  -1    1.85    0.43
  -8  -9   1    2.53    0.60
   8  -9  -1    1.59    0.46
  -8  -9   1    2.33    0.56
   8  -9  -1    2.03    0.51
  -8  -9   1    2.01    0.66
   8  -9  -1    1.75    0.51
   8   9  -1    1.34    0.44
  -8   9   1    2.06    0.45
  -8   9   1    1.70    0.66
   8   9  -1    2.49    0.50
   8   9  -1    1.90    0.44
  -8   9   1    1.97    0.52
  -8   9   1    1.90    0.43
   8   9  -1    2.07    0.47
  -7  -9   1    0.91    0.45
   7  -9  -1    1.10    0.34
  -7  -9   1    1.26    0.35
  -7  -9   1    1.63    0.57
  -7  -9   1    1.70    0.48
   7  -9  -1    1.27    0.42
   7  -9  -1    1.07    0.42
   7  -9  -1    0.65    0.38
  -7   9   1    0.67    0.35
   7   9  -1    0.85    0.38
  -7   9   1    0.66    0.41
   7   9  -1    0.73    0.33
  -7   9   1    1.42    0.54
   7   9  -1    1.61    0.39
   7   9  -1    0.84    0.37
  -7   9   1    0.66    0.37
  -6  -9   1    3.02    0.50
   6  -9  -1    3.92    0.62
   6  -9  -1    3.10    0.45
  -6  -9   1    3.72    0.53
  -6  -9   1    3.28    0.63
   6  -9  -1    3.01    0.39
   6  -9  -1    2.83    0.47
  -6  -9   1    2.81    0.41
  -6   9   1    3.16    0.57
   6   9  -1    3.12    0.43
   6   9  -1    3.29    0.47
  -6   9   1    2.89    0.48
   6   9  -1    3.00    0.38
  -6   9   1    3.38    0.40
   6   9  -1    3.26    0.47
  -6   9   1    2.75    0.43
   6   9  -1    2.66    0.43
  -5  -9   1   92.88    4.74
   5  -9  -1  100.43    4.74
  -5  -9   1  101.22    4.77
  -5  -9   1   95.12    4.72
  -5  -9   1  106.02    4.96
   5  -9  -1  101.37    4.71
   5  -9  -1   98.53    4.74
  -5  -9   1   88.73    4.62
   5   9  -1   95.27    4.67
  -5   9   1   98.61    4.74
  -5   9   1  101.51    4.68
  -5   9   1   98.47    4.66
  -5   9   1   96.85    4.85
   5   9  -1   99.67    4.75
  -5   9   1  106.36    4.83
   5   9  -1   98.18    4.73
   5   9  -1  100.11    4.76
   5   9  -1   93.01    4.72
   4  -9  -1   28.77    1.49
  -4  -9   1   26.35    1.47
  -4  -9   1   26.23    1.38
   4  -9  -1   28.09    1.48
   4  -9  -1   27.84    1.44
  -4  -9   1   28.04    1.50
  -4  -9   1   27.04    1.48
   4  -9  -1   28.58    1.46
  -4  -9   1   29.43    1.65
  -4   9   1   28.05    1.39
   4   9  -1   28.28    1.47
   4   9  -1   27.10    1.42
  -4   9   1   29.55    1.42
   4   9  -1   27.54    1.47
  -4   9   1   28.18    1.58
  -4   9   1   26.28    1.48
   4   9  -1   27.40    1.51
  -4   9   1   30.81    1.55
   4   9  -1   28.76    1.50
  -3  -9   1    2.25    0.35
   3  -9  -1    2.77    0.36
   3  -9  -1    2.86    0.32
  -3  -9   1    2.95    0.37
  -3  -9   1    2.69    0.35
  -3  -9   1    2.34    0.26
   3  -9  -1    2.34    0.33
   3  -9  -1    2.35    0.34
  -3  -9   1    2.70    0.46
   3  -9  -1    2.64    0.39
   3   9  -1    2.97    0.31
   3   9  -1    2.44    0.33
   3   9  -1    2.23    0.35
   3   9  -1    2.89    0.35
  -3   9   1    3.92    0.33
  -3   9   1    2.81    0.38
   3   9  -1    3.06    0.35
   3   9  -1    2.77    0.31
  -3   9   1    1.70    0.38
  -2  -9   1    0.95    0.28
   2  -9  -1    1.97    0.26
   2  -9  -1    2.21    0.31
   2  -9  -1    1.52    0.29
  -2  -9   1    1.39    0.36
  -2  -9   1    1.55    0.27
   2  -9  -1    1.38    0.28
  -2  -9   1    1.68    0.23
  -2  -9   1    2.09    0.33
   2  -9  -1    1.35    0.30
  -2   9   1    2.01    0.27
   2   9  -1    1.83    0.31
  -2   9   1    2.16    0.31
   2   9  -1    1.82    0.28
   2   9  -1    1.65    0.26
  -2   9   1    1.48    0.32
   2   9  -1    1.87    0.29
   2   9  -1    1.45    0.25
  -2   9   1    1.89    0.27
   2   9  -1    1.55    0.28
  -1  -9   1    0.69    0.26
  -1  -9   1    0.25    0.17
   1  -9  -1    0.72    0.25
  -1  -9   1    0.28    0.32
  -1  -9   1    0.65    0.23
   1  -9  -1    0.49    0.19
   1  -9  -1    0.39    0.24
  -1  -9   1    0.73    0.24
   1  -9  -1    0.55    0.23
  -1   9   1    0.55    0.22
   1   9  -1    0.52    0.22
   1   9  -1    0.18    0.21
   1   9  -1    0.41    0.22
  -1   9   1    0.53    0.23
   1   9  -1    0.61    0.22
  -1   9   1    0.50    0.22
  -1   9   1    0.38    0.21
   1   9  -1    0.66    0.23
   0  -9  -1    2.47    0.32
   0  -9   1    2.50    0.31
   0  -9   1    1.98    0.28
   0  -9  -1    2.66    0.30
   0  -9  -1    2.23    0.27
   0  -9  -1    2.73    0.33
   0  -9   1    2.41    0.27
   0  -9   1    2.35    0.30
   0   9  -1    2.62    0.29
   0   9   1    2.33    0.30
   0   9   1    2.25    0.29
   0   9   1    2.46    0.30
   0   9  -1    1.92    0.28
   0   9   1    2.16    0.29
   0   9  -1    1.96    0.28
   0   9  -1    1.87    0.30
   0   9  -1    2.52    0.28
  -1  -9  -1   -0.06    0.17
  -1  -9  -1   -0.04    0.21
   1  -9   1    0.03    0.21
  -1  -9  -1    0.05    0.25
   1  -9   1   -0.02    0.19
   1  -9   1    0.27    0.23
  -1  -9  -1    0.07    0.25
   1  -9   1    0.17    0.24
  -1   9  -1    0.00    0.22
  -1   9  -1    0.10    0.20
   1   9   1    0.10    0.26
   1   9   1   -0.01    0.22
   1   9   1    0.04    0.22
   1   9   1    0.07    0.21
   1   9   1    0.44    0.23
   1   9   1    0.19    0.22
  -1   9  -1    0.10    0.21
  -1   9  -1    0.17    0.22
  -2  -9  -1   37.22    1.88
  -2  -9  -1   39.38    1.90
   2  -9   1   37.65    1.86
   2  -9   1   36.67    1.84
   2  -9   1   35.47    1.85
   2  -9   1   37.69    1.83
  -2  -9  -1   36.64    1.81
  -2  -9  -1   37.61    1.82
  -2   9  -1   35.68    1.92
   2   9   1   34.63    1.84
  -2   9  -1   36.69    1.85
   2   9   1   35.23    1.85
  -2   9  -1   37.95    1.83
   2   9   1   36.22    1.93
   2   9   1   36.52    1.85
  -2   9  -1   36.10    1.83
   2   9   1   39.17    1.88
   2   9   1   36.54    1.86
   3  -9   1    0.50    0.27
  -3  -9  -1    0.85    0.32
   3  -9   1    0.67    0.23
   3  -9   1    1.16    0.29
  -3  -9  -1    0.58    0.22
   3  -9   1    0.39    0.27
  -3  -9  -1    0.91    0.44
  -3  -9  -1    0.50    0.31
   3   9   1    1.13    0.31
  -3   9  -1    0.84    0.34
   3   9   1    0.82    0.28
   3   9   1    0.51    0.28
  -3   9  -1    0.88    0.27
  -3   9  -1    0.89    0.30
   3   9   1    0.71    0.27
   3   9   1    0.90    0.29
   3   9   1    0.88    0.35
   4  -9   1    0.21    0.29
  -4  -9  -1    0.33    0.28
  -4  -9  -1    0.11    0.23
  -4  -9  -1    0.31    0.22
   4  -9   1    0.19    0.29
  -4  -9  -1    0.25    0.30
   4  -9   1    0.67    0.30
   4  -9   1    0.21    0.24
  -4  -9  -1    0.71    0.43
  -4   9  -1    0.28    0.33
  -4   9  -1    0.41    0.24
   4   9   1    0.35    0.26
   4   9   1    0.52    0.28
   4   9   1    0.67    0.35
   4   9   1    0.59    0.31
   4   9   1    0.66    0.32
  -4   9  -1    0.15    0.35
  -4   9  -1    0.62    0.26
   4   9   1    0.59    0.30
  -5  -9  -1   20.39    1.42
  -5  -9  -1   19.36    1.18
   5  -9   1   19.63    1.16
  -5  -9  -1   17.12    1.21
   5  -9   1   20.81    1.17
  -5  -9  -1   18.52    1.06
   5  -9   1   19.58    1.12
  -5  -9  -1   19.94    1.15
   5  -9   1   19.21    1.16
  -5   9  -1   19.44    1.10
  -5   9  -1   18.28    1.30
   5   9   1   19.49    1.18
   5   9   1   19.85    1.14
  -5   9  -1   20.20    1.09
   5   9   1   20.23    1.23
   5   9   1   20.56    1.17
  -5   9  -1   20.98    1.17
   5   9   1   19.46    1.15
   5   9   1   20.10    1.19
   6  -9   1    2.79    0.46
  -6  -9  -1    3.27    0.48
  -6  -9  -1    3.22    0.38
   6  -9   1    3.20    0.50
   6  -9   1    2.19    0.40
  -6  -9  -1    2.68    0.47
  -6  -9  -1    3.16    0.57
  -6  -9  -1    2.57    0.63
  -6  -9  -1    2.55    0.41
   6  -9   1    2.39    0.44
   6   9   1    3.04    0.48
  -6   9  -1    3.45    0.46
  -6   9  -1    2.14    0.50
  -6   9  -1    3.04    0.43
   6   9   1    2.34    0.41
   6   9   1    3.14    0.49
  -6   9  -1    2.34    0.38
   6   9   1    2.84    0.45
  -6   9  -1    3.16    0.61
   6   9   1    2.49    0.53
   7  -9   1   86.71    4.29
  -7  -9  -1   86.98    4.38
  -7  -9  -1   85.54    4.27
   7  -9   1   89.27    4.31
  -7  -9  -1   87.94    4.31
  -7  -9  -1   87.21    4.63
  -7  -9  -1   85.79    4.20
   7  -9   1   83.57    4.30
   7   9   1   85.67    4.33
  -7   9  -1   86.33    4.52
  -7   9  -1   90.41    4.32
   7   9   1   85.74    4.35
  -7   9  -1   84.60    4.20
   7   9   1   91.46    4.29
   7   9   1   88.19    4.32
   7   9   1   87.30    4.35
  -7   9  -1   90.69    4.47
   7   9   1   90.18    4.36
  -7   9  -1   89.37    4.28
  -8  -9  -1   18.53    1.22
  -8  -9  -1   17.01    1.32
   8  -9   1   18.96    1.25
  -8  -9  -1   17.72    1.06
  -8  -9  -1   17.99    1.54
   8  -9   1   17.90    1.17
   8  -9   1   18.19    1.21
  -8  -9  -1   17.30    1.13
  -8   9  -1   19.43    1.19
   8   9   1   19.08    1.29
   8   9   1   17.55    1.16
  -8   9  -1   17.97    1.06
   8   9   1   18.12    1.27
  -8   9  -1   19.85    1.39
  -8   9  -1   17.95    1.21
   8   9   1   17.70    1.23
   8   9   1   20.72    1.24
   8   9   1   18.07    1.28
   9  -9   1   18.88    1.26
   9  -9   1   18.91    1.24
  -9  -9  -1   15.44    1.13
  -9  -9  -1   18.44    1.07
  -9  -9  -1   20.03    1.25
   9  -9   1   19.92    1.32
  -9  -9  -1   17.87    1.61
  -9  -9  -1   15.48    1.37
   9   9   1   17.72    1.33
   9   9   1   17.88    1.30
  -9   9  -1   19.91    1.25
   9   9   1   18.30    1.26
  -9   9  -1   17.54    1.06
  -9   9  -1   16.85    1.39
  -9   9  -1   18.40    1.23
   9   9   1   18.76    1.29
 -10  -9  -1   23.66    1.37
  10  -9   1   26.56    1.58
 -10  -9  -1   23.15    1.96
  10  -9   1   27.41    1.68
 -10  -9  -1   23.54    1.73
  10  -9   1   24.93    1.60
 -10  -9  -1   26.25    1.55
  10   9   1   23.22    1.58
 -10   9  -1   23.94    1.77
 -10   9  -1   27.31    1.58
 -10   9  -1   27.11    1.59
  10   9   1   21.17    1.59
  10   9   1   23.26    1.69
  11  -9   1    8.70    0.93
 -11  -9  -1    9.20    1.30
  11  -9   1    9.98    1.07
 -11  -9  -1    8.94    1.18
  11  -9   1    7.88    0.92
 -11   9  -1    9.69    0.92
  11   9   1    9.21    0.96
 -11   9  -1   10.30    1.02
  11   9   1    6.95    0.98
  11   9   1    6.89    0.95
 -12  -9  -1   11.93    1.44
  12  -9   1   12.36    1.19
  12  -9   1   14.47    1.26
 -12  -9  -1   14.29    1.70
  12   9   1   12.85    1.32
 -12   9  -1   15.43    1.30
  12   9   1   14.17    1.25
 -12   9  -1   15.58    1.25
 -13  -9  -1   10.14    1.57
  13  -9   1    9.55    1.11
  13  -9   1    6.91    0.99
 -13  -9  -1   12.15    1.40
 -13   9  -1    9.41    0.98
  13   9   1    6.58    1.09
  13   9   1    9.09    1.09
 -13   9  -1    9.36    1.09
  14  -9   1   12.85    1.34
 -14  -9  -1   13.45    1.78
 -14  -9  -1   12.71    1.56
  14  -9   1   13.38    1.33
  14   9   1   11.37    1.38
  14   9   1   15.17    1.39
 -14   9  -1   13.95    1.37
  15  -9   1    4.54    1.01
 -15  -9  -1    5.24    1.28
  15  -9   1    4.47    1.01
 -15   9  -1    5.73    1.04
  15   9   1    4.25    1.05
  15   9   1    3.31    1.05
 -16  -9  -1    1.64    1.19
  16  -9   1    1.48    0.97
  16  -9   1    2.31    0.99
 -16   9  -1    1.58    0.96
  16   9   1    2.00    1.11
  16   9   1    3.77    1.05
  17  -9   1    0.02    0.98
  17  -9   1   -0.15    0.91
 -17  -9  -1   -0.19    1.15
 -17   9  -1   -0.61    0.92
  17   9   1    1.46    0.98
  17   9   1    2.85    1.00
  17   9   1    1.21    1.07
  18  -9   1    1.14    1.13
 -18  -9  -1    0.49    1.28
 -18   9  -1    0.86    1.08
  18   9   1    0.42    1.09
  18   9   1    1.35    0.96
 -19  -9  -1    3.27    1.39
  19  -9   1    1.47    1.26
  19   9   1    2.50    1.48
 -19   9  -1    2.87    1.21
  19   9   1    2.77    1.26
 -19 -10   1    1.33    1.97
 -19 -10   1   -1.43    1.28
  19 -10  -1    0.42    1.15
  19  10  -1   -0.01    1.14
 -19  10   1   -0.67    0.95
 -18 -10   1    0.27    1.43
 -18 -10   1   -0.75    1.20
  18 -10  -1    0.00    1.09
 -18  10   1    1.13    0.98
  18  10  -1   -0.04    1.11
  17 -10  -1   -0.39    0.95
 -17 -10   1    0.58    1.11
  17 -10  -1   -0.39    0.96
 -17 -10   1    1.85    1.39
  17  10  -1   -1.32    1.14
  17  10  -1   -0.84    0.96
 -17  10   1   -0.63    0.86
  16 -10  -1    0.89    0.95
 -16 -10   1   -0.91    1.03
  16 -10  -1    0.60    0.95
 -16 -10   1    2.49    1.29
  16  10  -1    1.88    0.97
  16  10  -1    1.40    1.04
 -16  10   1    1.72    0.89
 -15 -10   1    0.10    1.07
  15 -10  -1    0.53    0.85
  15 -10  -1    0.58    0.81
 -15 -10   1   -0.92    0.96
  15  10  -1   -0.40    0.90
 -15  10   1    0.33    0.77
  15  10  -1    1.55    0.86
 -14 -10   1    7.11    1.23
  14 -10  -1    6.93    1.01
 -14 -10   1    6.99    1.43
  14 -10  -1    5.39    1.01
  14  10  -1    6.64    1.04
 -14  10   1    7.67    1.01
  14  10  -1    7.55    1.20
 -13 -10   1    4.00    1.01
  13 -10  -1    3.22    0.83
 -13 -10   1    5.97    1.31
  13 -10  -1    5.36    0.88
  13  10  -1    2.71    0.88
  13  10  -1    5.36    1.05
 -13  10   1    4.37    1.01
 -13  10   1    5.72    0.88
  13  10  -1    5.62    0.92
 -12 -10   1   11.54    1.31
  12 -10  -1   10.03    1.05
  12 -10  -1   10.08    1.08
 -12 -10   1   11.94    1.51
 -12  10   1   14.39    1.09
 -12  10   1   13.36    1.13
  12  10  -1   11.76    1.11
  12  10  -1   10.08    1.16
  12  10  -1   11.90    1.21
 -12  10   1   12.15    1.25
  11 -10  -1   91.12    4.63
  11 -10  -1   92.48    4.61
 -11 -10   1   85.09    4.99
 -11 -10   1   92.32    4.71
 -11  10   1   92.45    4.56
  11  10  -1   93.67    4.72
 -11  10   1   97.67    4.60
  11  10  -1   90.14    4.65
 -11  10   1   90.67    4.78
  11  10  -1   88.20    4.61
 -10 -10   1    0.32    0.69
  10 -10  -1   -0.25    0.44
  10 -10  -1   -0.33    0.46
 -10 -10   1   -0.37    0.65
  10 -10  -1   -0.43    0.55
 -10  10   1   -0.09    0.44
 -10  10   1   -0.41    0.46
  10  10  -1   -0.41    0.53
  10  10  -1    0.28    0.47
 -10  10   1    0.21    0.53
  10  10  -1    0.01    0.52
  -9 -10   1   53.55    3.05
   9 -10  -1   55.65    2.75
   9 -10  -1   50.14    2.65
  -9 -10   1   49.12    2.80
   9 -10  -1   49.89    2.69
  -9 -10   1   48.09    2.75
  -9  10   1   53.19    2.64
   9  10  -1   50.90    2.74
   9  10  -1   47.88    2.67
  -9  10   1   52.52    2.66
  -9  10   1   50.81    2.81
   9  10  -1   50.65    2.72
  -8 -10   1    6.30    0.82
   8 -10  -1    8.57    0.81
   8 -10  -1    6.75    0.74
   8 -10  -1    8.75    1.04
  -8 -10   1    7.28    0.83
   8 -10  -1    8.12    0.70
  -8 -10   1    7.82    1.01
  -8 -10   1    8.75    0.72
   8  10  -1    7.48    0.70
  -8  10   1    7.11    0.97
  -8  10   1    9.78    0.88
   8  10  -1    7.65    0.77
  -8  10   1    7.23    0.72
   8  10  -1    7.61    0.76
  -8  10   1    7.32    0.69
   8  10  -1    7.15    0.68
   8  10  -1    7.90    0.78
   7 -10  -1   60.20    2.99
  -7 -10   1   61.47    2.99
  -7 -10   1   57.79    3.09
   7 -10  -1   53.42    3.09
   7 -10  -1   64.24    3.05
  -7 -10   1   60.84    3.32
   7 -10  -1   61.25    3.03
  -7 -10   1   57.10    3.06
   7  10  -1   57.27    3.03
  -7  10   1   64.70    2.97
   7  10  -1   60.90    3.06
   7  10  -1   58.09    2.97
  -7  10   1   59.29    3.22
  -7  10   1   64.01    3.15
   7  10  -1   59.40    3.04
   7  10  -1   57.34    3.01
  -7  10   1   60.45    3.02
  -6 -10   1   49.15    2.67
   6 -10  -1   48.45    2.42
   6 -10  -1   47.29    2.37
  -6 -10   1   46.23    2.45
  -6 -10   1   44.76    2.42
   6 -10  -1   46.04    2.41
  -6 -10   1   47.00    2.38
  -6  10   1   47.84    2.31
  -6  10   1   46.25    2.56
  -6  10   1   49.77    2.50
  -6  10   1   48.50    2.33
   6  10  -1   43.32    2.34
   6  10  -1   47.98    2.43
   6  10  -1   43.68    2.40
   6  10  -1   47.75    2.41
  -6  10   1   45.87    2.40
   6  10  -1   48.64    2.43
  -5 -10   1   74.48    4.03
   5 -10  -1   85.48    4.01
  -5 -10   1   85.73    4.26
  -5 -10   1   82.29    4.03
  -5 -10   1   83.79    4.07
   5 -10  -1   86.34    4.04
   5 -10  -1   84.38    4.05
   5  10  -1   81.93    4.04
   5  10  -1   83.03    4.07
  -5  10   1   85.74    4.12
   5  10  -1   87.80    4.07
   5  10  -1   81.37    3.98
  -5  10   1   82.12    4.17
  -5  10   1   82.14    3.96
  -5  10   1   82.43    3.97
   5  10  -1   80.91    4.03
  -4 -10   1    0.02    0.29
   4 -10  -1    0.23    0.23
  -4 -10   1    0.18    0.39
   4 -10  -1   -0.24    0.26
   4 -10  -1   -0.35    0.28
  -4 -10   1    0.18    0.20
  -4 -10   1    0.05    0.29
  -4 -10   1   -0.47    0.28
   4 -10  -1   -0.09    0.27
   4  10  -1   -0.03    0.25
  -4  10   1    0.01    0.23
   4  10  -1   -0.10    0.23
  -4  10   1    0.40    0.31
   4  10  -1    0.34    0.33
   4  10  -1    0.32    0.27
  -4  10   1    0.36    0.36
   4  10  -1   -0.02    0.29
  -4  10   1    0.18    0.31
   3 -10  -1   20.94    1.10
  -3 -10   1   18.00    1.08
   3 -10  -1   21.22    1.15
  -3 -10   1   18.90    1.04
   3 -10  -1   20.79    1.12
   3 -10  -1   21.06    1.13
  -3 -10   1   19.62    1.14
   3 -10  -1   21.44    1.20
  -3 -10   1   20.75    1.28
  -3 -10   1   21.45    1.14
   3  10  -1   21.42    1.16
  -3  10   1   20.51    1.14
   3  10  -1   20.03    1.13
  -3  10   1   20.82    1.10
   3  10  -1   20.51    1.08
   3  10  -1   20.18    1.13
  -3  10   1   21.51    1.23
   3  10  -1   19.29    1.10
  -2 -10   1   59.72    2.81
   2 -10  -1   56.20    2.65
  -2 -10   1   53.67    2.67
   2 -10  -1   55.23    2.68
   2 -10  -1   53.17    2.70
  -2 -10   1   55.88    2.69
  -2 -10   1   53.31    2.61
   2 -10  -1   58.03    2.66
   2 -10  -1   55.01    2.66
   2  10  -1   54.75    2.68
  -2  10   1   53.16    2.64
  -2  10   1   53.77    2.66
   2  10  -1   50.64    2.64
   2  10  -1   51.37    2.65
   2  10  -1   55.46    2.67
   2  10  -1   54.31    2.63
  -2  10   1   56.75    2.74
   2  10  -1   50.57    2.66
  -2  10   1   54.96    2.65
  -1 -10   1    1.58    0.28
  -1 -10   1    2.01    0.25
   1 -10  -1    2.18    0.32
  -1 -10   1    2.21    0.40
   1 -10  -1    1.48    0.30
  -1 -10   1    1.84    0.30
   1 -10  -1    1.33    0.26
   1 -10  -1    1.52    0.30
  -1 -10   1    1.87    0.33
   1  10  -1    2.19    0.28
   1  10  -1    1.69    0.29
  -1  10   1    2.01    0.30
   1  10  -1    1.51    0.28
   1  10  -1    2.10    0.31
  -1  10   1    1.63    0.29
   1  10  -1    1.35    0.29
  -1  10   1    2.45    0.30
  -1  10   1    2.33    0.32
   0 -10   1    4.44    0.37
   0 -10   1    4.09    0.40
   0 -10  -1    4.46    0.44
   0 -10  -1    4.29    0.39
   0 -10   1    3.79    0.41
   0 -10  -1    4.40    0.36
   0 -10   1    3.58    0.39
   0 -10  -1    3.81    0.41
   0  10   1    3.40    0.38
   0  10   1    3.77    0.39
   0  10   1    4.62    0.41
   0  10  -1    3.84    0.38
   0  10  -1    4.25    0.39
   0  10   1    3.68    0.38
   0  10  -1    4.09    0.39
   0  10  -1    4.37    0.39
   0  10  -1    4.32    0.42
   1 -10   1    0.24    0.23
  -1 -10  -1    0.50    0.28
   1 -10   1    0.19    0.26
   1 -10   1    0.47    0.22
  -1 -10  -1    0.34    0.28
  -1 -10  -1   -0.05    0.19
  -1 -10  -1    0.42    0.24
   1 -10   1    0.20    0.25
   1  10   1    0.04    0.24
  -1  10  -1    0.63    0.25
   1  10   1    0.03    0.30
   1  10   1    0.37    0.24
   1  10   1    0.35    0.24
  -1  10  -1    0.24    0.24
  -1  10  -1    0.69    0.26
   1  10   1    0.32    0.24
   1  10   1    0.39    0.28
  -1  10  -1    0.34    0.24
  -2 -10  -1    2.85    0.41
  -2 -10  -1    2.78    0.32
  -2 -10  -1    2.00    0.30
  -2 -10  -1    2.53    0.29
   2 -10   1    2.63    0.35
   2 -10   1    2.80    0.32
   2 -10   1    2.89    0.38
   2 -10   1    2.53    0.36
  -2 -10  -1    2.59    0.38
   2  10   1    2.03    0.34
  -2  10  -1    3.24    0.34
  -2  10  -1    2.79    0.34
  -2  10  -1    2.22    0.41
  -2  10  -1    2.97    0.36
   2  10   1    2.46    0.35
  -2  10  -1    2.65    0.41
   2  10   1    2.88    0.45
   2  10   1    2.26    0.36
   2  10   1    2.08    0.34
   2  10   1    2.90    0.36
  -3 -10  -1    0.18    0.32
  -3 -10  -1    0.55    0.30
  -3 -10  -1   -0.18    0.13
  -3 -10  -1    0.43    0.23
  -3 -10  -1    0.63    0.42
   3 -10   1    0.51    0.28
   3 -10   1    0.32    0.28
   3 -10   1    0.25    0.24
   3 -10   1    0.65    0.29
   3  10   1    0.93    0.29
  -3  10  -1    0.51    0.35
   3  10   1    0.28    0.29
   3  10   1    0.39    0.27
   3  10   1    0.40    0.35
   3  10   1    0.32    0.29
  -3  10  -1    0.40    0.29
  -3  10  -1    0.48    0.27
   3  10   1    0.49    0.29
  -4 -10  -1    8.50    0.70
   4 -10   1    7.25    0.61
   4 -10   1    7.35    0.63
  -4 -10  -1    6.66    0.60
  -4 -10  -1    7.63    0.85
   4 -10   1    6.56    0.58
  -4 -10  -1    6.99    0.54
   4 -10   1    8.20    0.65
  -4 -10  -1    6.58    0.60
  -4 -10  -1    7.29    0.55
  -4  10  -1    6.96    0.59
   4  10   1    7.58    0.64
   4  10   1    6.90    0.65
   4  10   1    7.83    0.64
   4  10   1    7.24    0.62
  -4  10  -1    8.34    0.67
   4  10   1    8.32    0.75
  -4  10  -1    7.17    0.75
   5 -10   1   36.06    1.96
   5 -10   1   40.33    1.97
  -5 -10  -1   37.10    1.88
  -5 -10  -1   38.19    2.24
   5 -10   1   35.07    1.93
  -5 -10  -1   37.86    2.00
   5 -10   1   38.05    1.95
  -5 -10  -1   35.55    2.01
  -5 -10  -1   35.92    1.94
   5  10   1   36.44    1.94
   5  10   1   36.43    1.99
   5  10   1   37.21    1.96
  -5  10  -1   37.28    1.89
   5  10   1   38.93    1.98
   5  10   1   36.63    2.03
  -5  10  -1   36.69    2.11
  -5  10  -1   39.82    2.00
  -5  10  -1   39.74    1.90
   5  10   1   37.53    2.00
  -6 -10  -1   22.44    1.31
  -6 -10  -1   20.74    1.34
   6 -10   1   21.60    1.28
  -6 -10  -1   21.97    1.58
  -6 -10  -1   18.95    1.26
  -6 -10  -1   21.45    1.16
   6 -10   1   20.99    1.28
   6 -10   1   21.02    1.25
   6 -10   1   18.79    1.41
   6  10   1   20.88    1.27
   6  10   1   21.79    1.26
   6  10   1   20.57    1.34
   6  10   1   22.00    1.33
   6  10   1   21.95    1.33
  -6  10  -1   21.08    1.19
  -6  10  -1   21.75    1.21
   6  10   1   21.04    1.28
  -6  10  -1   18.93    1.45
  -6  10  -1   22.93    1.29
  -6  10  -1   24.71    1.42
   7 -10   1   91.01    4.33
  -7 -10  -1   85.85    4.21
   7 -10   1   87.06    4.31
  -7 -10  -1   88.93    4.67
   7 -10   1   81.08    4.31
  -7 -10  -1   81.93    4.39
  -7 -10  -1   93.04    4.35
  -7  10  -1   90.77    4.29
  -7  10  -1   91.36    4.34
   7  10   1   88.52    4.37
  -7  10  -1   88.85    4.22
   7  10   1   92.75    4.31
  -7  10  -1   86.84    4.54
   7  10   1   85.83    4.33
   7  10   1   83.52    4.37
  -7  10  -1   88.74    4.48
   7  10   1   84.94    4.39
   8 -10   1    2.96    0.57
   8 -10   1    2.37    0.51
  -8 -10  -1    3.60    0.58
  -8 -10  -1    3.11    0.41
  -8 -10  -1    3.67    0.72
  -8 -10  -1    3.69    0.81
   8 -10   1    4.57    0.64
  -8  10  -1    3.56    0.56
   8  10   1    3.13    0.55
  -8  10  -1    1.84    0.41
   8  10   1    2.79    0.55
   8  10   1    3.21    0.58
  -8  10  -1    2.49    0.63
  -8  10  -1    2.95    0.54
   8  10   1    3.40    0.54
   8  10   1    3.99    0.63
   8  10   1    3.69    0.65
  -8  10  -1    3.23    0.79
  -9 -10  -1    1.99    0.81
  -9 -10  -1    2.14    0.56
   9 -10   1    1.30    0.50
   9 -10   1    1.14    0.55
  -9 -10  -1    0.93    0.37
  -9 -10  -1    0.25    0.66
   9 -10   1    1.24    0.52
   9  10   1    1.68    0.52
  -9  10  -1    0.73    0.56
  -9  10  -1    0.45    0.36
   9  10   1    0.94    0.56
   9  10   1    1.02    0.46
   9  10   1    0.96    0.54
   9  10   1    1.56    0.54
  -9  10  -1    1.62    0.53
  -9  10  -1    0.86    0.52
  10 -10   1    5.60    0.78
 -10 -10  -1    6.29    1.14
 -10 -10  -1    8.99    1.11
  10 -10   1    7.96    0.89
 -10 -10  -1    6.16    0.61
  10 -10   1    8.22    0.85
 -10 -10  -1    7.24    0.80
  10  10   1    6.99    0.77
 -10  10  -1    6.69    1.31
  10  10   1    8.58    0.99
  10  10   1    7.35    0.87
  10  10   1    5.04    0.83
 -10  10  -1    8.45    0.86
 -10  10  -1    9.27    0.88
  10  10   1    6.92    0.84
 -11 -10  -1    4.91    1.14
  11 -10   1    3.92    0.74
 -11 -10  -1    3.55    0.96
  11 -10   1    4.20    0.82
  11 -10   1    5.10    0.76
  11  10   1    4.27    0.85
 -11  10  -1    4.42    0.73
 -11  10  -1    3.31    0.76
  11  10   1    4.57    0.80
  11  10   1    4.78    0.79
 -12 -10  -1    9.20    1.45
 -12 -10  -1    8.66    1.26
  12 -10   1    8.68    1.03
  12 -10   1    8.78    1.01
  12  10   1   10.19    1.08
  12  10   1    8.01    1.10
 -12  10  -1    9.82    1.06
 -12  10  -1    9.30    0.99
 -13 -10  -1   -1.80    0.92
 -13 -10  -1   -0.91    0.91
  13 -10   1   -0.23    0.65
  13 -10   1   -1.44    0.63
  13  10   1   -0.06    0.69
 -13  10  -1    1.20    0.75
  13  10   1   -0.97    0.75
 -13  10  -1   -0.63    0.65
  14 -10   1   -0.13    0.78
  14 -10   1    1.51    0.81
 -14 -10  -1   -0.47    1.14
 -14 -10  -1   -0.18    1.02
  14  10   1   -0.16    0.86
  14  10   1    1.44    0.83
 -14  10  -1    0.08    0.81
  14  10   1    1.02    0.70
  15 -10   1   16.20    1.54
  15 -10   1   12.35    1.45
 -15 -10  -1   14.13    1.72
  15  10   1   14.31    1.41
  15  10   1   14.01    1.59
 -15  10  -1   15.54    1.46
  15  10   1   17.75    1.60
 -16 -10  -1    2.86    1.27
  16 -10   1    1.99    1.02
  16 -10   1    2.28    1.03
  16  10   1    0.96    0.85
 -16  10  -1    2.09    0.95
  16  10   1    1.89    1.10
  16  10   1    1.85    1.04
 -17 -10  -1    6.11    1.44
  17 -10   1    7.65    1.36
  17 -10   1    9.80    1.40
 -17  10  -1    6.92    1.21
  17  10   1    8.07    1.27
  17  10   1    9.83    1.46
  17  10   1   10.23    1.55
 -18 -10  -1    1.40    1.27
  18 -10   1   -0.41    1.07
 -18  10  -1   -0.64    1.02
  18  10   1    0.84    1.14
  18  10   1    0.04    0.98
 -19 -10  -1   -1.91    1.26
  19 -10   1    0.57    1.18
  19  10   1    1.80    1.27
 -19  10  -1   -1.59    1.00
 -19 -11   1    2.81    2.28
  19 -11  -1    2.35    1.29
 -19 -11   1    0.60    1.38
 -19  11   1    1.19    1.07
  19  11  -1    1.03    1.23
  19  11  -1    2.45    1.13
 -18 -11   1    2.92    1.39
  18 -11  -1    2.99    1.30
 -18 -11   1    6.07    1.81
 -18  11   1    3.67    1.07
  18  11  -1    4.55    1.27
  18  11  -1    3.86    1.12
  17 -11  -1    5.16    1.11
 -17 -11   1    5.38    1.60
 -17 -11   1    3.03    1.30
  17 -11  -1    4.95    1.20
  17  11  -1    6.09    1.36
 -17  11   1    1.96    0.98
  17  11  -1    7.20    1.30
 -16 -11   1    0.47    1.05
 -16 -11   1   -0.16    1.24
  16 -11  -1    0.30    0.95
  16 -11  -1    0.90    0.91
  16  11  -1   -0.50    0.99
  16  11  -1   -1.13    0.92
 -16  11   1    1.28    0.84
  15 -11  -1    7.33    1.19
 -15 -11   1    8.59    1.63
 -15 -11   1    5.54    1.26
  15 -11  -1    6.87    1.10
 -15  11   1    6.43    1.04
  15  11  -1    7.22    1.14
  15  11  -1    8.61    1.24
 -14 -11   1    0.54    1.05
 -14 -11   1    1.08    0.97
  14 -11  -1    1.44    0.76
  14 -11  -1    0.37    0.76
  14  11  -1    0.74    0.77
  14  11  -1   -0.36    0.88
 -14  11   1    1.17    0.74
  13 -11  -1    0.49    0.71
 -13 -11   1    0.59    1.01
  13 -11  -1    0.59    0.69
 -13 -11   1   -0.13    0.91
  13  11  -1   -0.73    0.71
  13  11  -1   -0.44    0.69
 -13  11   1    0.77    0.67
  13  11  -1   -0.29    0.80
 -12 -11   1   -0.67    0.77
  12 -11  -1   -0.02    0.59
  12 -11  -1    0.66    0.65
 -12 -11   1    0.01    0.89
 -12  11   1   -0.49    0.62
 -12  11   1   -0.34    0.56
 -12  11   1   -0.21    0.59
  12  11  -1    0.49    0.70
  12  11  -1   -0.51    0.66
  12  11  -1    0.26    0.66
 -11 -11   1    4.88    1.07
  11 -11  -1    5.21    0.74
  11 -11  -1    5.54    0.80
 -11 -11   1    4.98    0.96
 -11  11   1    5.49    0.75
 -11  11   1    6.29    0.76
 -11  11   1    4.56    0.82
  11  11  -1    5.56    0.83
  11  11  -1    5.62    0.85
  11  11  -1    4.36    0.76
 -10 -11   1   -0.24    0.74
  10 -11  -1   -0.99    0.48
  10 -11  -1    0.36    0.70
  10 -11  -1    0.40    0.50
 -10 -11   1    0.30    0.68
  10  11  -1    0.04    0.49
 -10  11   1   -0.11    0.48
  10  11  -1   -0.13    0.54
 -10  11   1    0.26    0.55
 -10  11   1    0.42    0.52
  10  11  -1   -0.48    0.54
  -9 -11   1   11.78    1.30
   9 -11  -1   11.56    1.00
  -9 -11   1   10.09    1.06
  -9 -11   1   10.72    1.10
   9 -11  -1   12.24    0.97
   9 -11  -1   13.53    1.07
  -9  11   1   12.25    1.09
   9  11  -1   10.87    0.97
   9  11  -1   10.76    1.00
  -9  11   1   11.97    0.91
  -9  11   1   13.10    0.98
  -9  11   1   13.45    1.34
   9  11  -1   10.31    0.99
  -8 -11   1    3.06    0.47
  -8 -11   1    2.92    0.63
  -8 -11   1    2.75    0.73
   8 -11  -1    2.78    0.56
   8 -11  -1    3.37    0.53
  -8 -11   1    1.64    0.61
   8 -11  -1    2.16    0.50
   8  11  -1    3.91    0.60
  -8  11   1    1.66    0.44
  -8  11   1    3.25    0.54
   8  11  -1    3.19    0.57
  -8  11   1    2.76    0.56
   8  11  -1    3.49    0.58
   8  11  -1    2.60    0.51
  -8  11   1    3.01    0.73
   8  11  -1    3.07    0.50
   7 -11  -1   50.42    2.52
  -7 -11   1   46.27    2.47
  -7 -11   1   47.52    2.57
   7 -11  -1   51.76    2.49
  -7 -11   1   42.83    2.53
  -7 -11   1   49.38    2.82
   7 -11  -1   51.11    2.53
  -7  11   1   47.82    2.51
  -7  11   1   49.80    2.61
   7  11  -1   47.08    2.51
   7  11  -1   49.32    2.55
   7  11  -1   50.06    2.54
   7  11  -1   46.53    2.54
  -7  11   1   49.40    2.44
   7  11  -1   45.89    2.45
  -7  11   1   50.11    2.73
   6 -11  -1   33.34    1.69
  -6 -11   1   31.08    1.98
   6 -11  -1   33.06    1.74
  -6 -11   1   32.84    1.78
  -6 -11   1   30.03    1.73
  -6 -11   1   31.46    1.71
   6 -11  -1   31.99    1.72
   6  11  -1   32.74    1.77
   6  11  -1   30.95    1.66
  -6  11   1   30.76    1.62
  -6  11   1   30.49    1.88
   6  11  -1   32.97    1.76
   6  11  -1   29.18    1.72
  -6  11   1   31.44    1.62
  -6  11   1   31.89    1.80
   6  11  -1   32.33    1.73
  -6  11   1   30.75    1.71
   5 -11  -1   45.24    2.23
  -5 -11   1   40.69    2.25
  -5 -11   1   45.98    2.27
   5 -11  -1   46.11    2.27
   5 -11  -1   43.80    2.26
  -5 -11   1   40.39    2.14
  -5 -11   1   44.20    2.49
  -5 -11   1   44.59    2.29
   5  11  -1   42.60    2.31
   5  11  -1   43.91    2.27
  -5  11   1   45.60    2.42
   5  11  -1   45.09    2.21
   5  11  -1   45.58    2.26
  -5  11   1   41.85    2.16
  -5  11   1   46.59    2.35
   5  11  -1   44.65    2.23
  -5  11   1   44.20    2.19
   5  11  -1   45.67    2.29
   4 -11  -1    6.55    0.57
   4 -11  -1    4.90    0.56
   4 -11  -1    5.31    0.53
   4 -11  -1    6.01    0.56
  -4 -11   1    5.20    0.43
   4 -11  -1    6.00    0.50
  -4 -11   1    6.75    0.57
  -4 -11   1    5.76    0.71
  -4 -11   1    5.59    0.57
  -4 -11   1    5.44    0.54
  -4  11   1    6.20    0.66
   4  11  -1    6.24    0.50
  -4  11   1    5.87    0.56
   4  11  -1    5.10    0.53
   4  11  -1    5.98    0.57
  -4  11   1    6.60    0.50
   4  11  -1    6.37    0.58
   4  11  -1    4.75    0.59
   3 -11  -1   25.93    1.30
  -3 -11   1   24.69    1.25
   3 -11  -1   25.54    1.32
  -3 -11   1   24.65    1.33
  -3 -11   1   20.31    1.27
   3 -11  -1   24.95    1.33
   3 -11  -1   27.15    1.36
  -3 -11   1   26.03    1.36
  -3 -11   1   26.31    1.51
   3 -11  -1   24.50    1.38
   3  11  -1   22.54    1.28
   3  11  -1   24.26    1.33
  -3  11   1   26.17    1.30
  -3  11   1   23.79    1.41
   3  11  -1   22.75    1.30
   3  11  -1   24.26    1.35
  -3  11   1   24.94    1.34
   3  11  -1   24.11    1.34
  -2 -11   1    2.08    0.43
   2 -11  -1    2.27    0.36
  -2 -11   1    1.76    0.32
   2 -11  -1    1.47    0.36
   2 -11  -1    1.08    0.32
  -2 -11   1    2.35    0.28
   2 -11  -1    2.14    0.31
  -2 -11   1    2.05    0.37
   2 -11  -1    1.86    0.32
   2  11  -1    2.38    0.34
   2  11  -1    1.61    0.31
  -2  11   1    1.87    0.34
   2  11  -1    2.23    0.34
  -2  11   1    1.41    0.30
   2  11  -1    2.04    0.34
   2  11  -1    1.47    0.29
  -2  11   1    2.19    0.33
   1 -11  -1   34.95    1.70
  -1 -11   1   32.95    1.71
   1 -11  -1   33.28    1.70
  -1 -11   1   36.00    1.82
  -1 -11   1   33.88    1.67
  -1 -11   1   32.67    1.69
  -1 -11   1   32.49    1.64
   1 -11  -1   31.52    1.71
   1 -11  -1   34.22    1.67
  -1  11   1   33.61    1.68
  -1  11   1   31.16    1.67
  -1  11   1   33.37    1.69
   1  11  -1   32.96    1.68
   1  11  -1   30.99    1.67
   1  11  -1   33.34    1.71
  -1  11   1   31.66    1.69
   1  11  -1   33.79    1.69
   1  11  -1   32.85    1.66
   0 -11  -1    2.70    0.35
   0 -11   1    2.20    0.34
   0 -11   1    1.99    0.28
   0 -11   1    2.29    0.35
   0 -11  -1    2.14    0.36
   0 -11  -1    1.86    0.36
   0 -11   1    1.86    0.34
   0 -11  -1    2.22    0.30
   0  11  -1    2.58    0.33
   0  11   1    2.01    0.33
   0  11  -1    2.05    0.32
   0  11   1    1.71    0.32
   0  11   1    2.26    0.32
   0  11   1    2.09    0.32
   0  11  -1    2.31    0.33
   0  11  -1    2.31    0.32
   0  11  -1    2.25    0.34
   1 -11   1   27.32    1.39
  -1 -11  -1   26.55    1.44
  -1 -11  -1   27.25    1.36
   1 -11   1   25.89    1.40
   1 -11   1   27.21    1.37
  -1 -11  -1   26.69    1.37
   1 -11   1   26.47    1.41
  -1 -11  -1   28.02    1.44
  -1  11  -1   26.39    1.38
  -1  11  -1   25.78    1.38
   1  11   1   27.10    1.40
   1  11   1   27.68    1.43
   1  11   1   26.91    1.50
  -1  11  -1   25.22    1.41
   1  11   1   25.43    1.39
   1  11   1   25.35    1.38
  -1  11  -1   24.93    1.37
   1  11   1   25.23    1.38
   2 -11   1   13.20    0.86
   2 -11   1   13.02    0.80
  -2 -11  -1   13.81    0.80
  -2 -11  -1   12.90    0.89
  -2 -11  -1   14.00    0.89
   2 -11   1   13.62    0.85
  -2 -11  -1   13.52    0.78
   2 -11   1   13.60    0.83
   2  11   1   13.57    0.84
   2  11   1   12.97    0.83
   2  11   1   13.10    0.83
  -2  11  -1   12.25    0.80
  -2  11  -1   13.37    0.85
   2  11   1   12.60    0.83
  -2  11  -1   12.64    0.90
   2  11   1   14.21    0.95
   2  11   1   13.29    0.87
  -2  11  -1   14.17    0.83
  -2  11  -1   13.72    0.82
  -3 -11  -1   82.97    3.90
   3 -11   1   79.03    3.86
  -3 -11  -1   82.19    3.81
   3 -11   1   80.32    3.83
  -3 -11  -1   77.92    3.80
   3 -11   1   78.39    3.86
   3 -11   1   79.33    3.83
  -3 -11  -1   81.03    3.88
  -3 -11  -1   82.66    4.09
  -3  11  -1   75.68    3.95
   3  11   1   77.66    3.84
  -3  11  -1   80.07    3.82
   3  11   1   78.44    3.86
   3  11   1   82.12    3.89
   3  11   1   76.73    3.85
  -3  11  -1   76.56    3.85
  -3  11  -1   78.60    3.83
   3  11   1   80.10    3.85
   3  11   1   79.01    3.94
  -4 -11  -1    7.10    0.67
  -4 -11  -1    7.46    0.55
   4 -11   1    7.28    0.63
  -4 -11  -1    7.88    0.68
   4 -11   1    7.67    0.63
   4 -11   1    5.58    0.59
  -4 -11  -1    5.59    0.51
  -4 -11  -1    6.66    0.81
  -4 -11  -1    7.50    0.65
   4 -11   1    8.10    0.60
  -4 -11  -1    6.88    0.60
   4  11   1    7.61    0.65
   4  11   1    7.01    0.61
   4  11   1    7.12    0.74
   4  11   1    6.35    0.60
  -4  11  -1    7.23    0.64
   4  11   1    6.85    0.65
  -4  11  -1    7.32    0.60
  -4  11  -1    8.28    0.81
   5 -11   1   70.28    3.42
  -5 -11  -1   71.76    3.48
  -5 -11  -1   69.60    3.72
   5 -11   1   68.99    3.44
   5 -11   1   70.53    3.45
   5 -11   1   70.70    3.43
  -5 -11  -1   67.03    3.41
  -5 -11  -1   68.10    3.48
  -5 -11  -1   65.53    3.35
   5  11   1   66.27    3.46
   5  11   1   71.07    3.43
  -5  11  -1   71.69    3.46
  -5  11  -1   69.76    3.36
   5  11   1   69.46    3.48
   5  11   1   70.41    3.52
  -5  11  -1   71.57    3.38
  -5  11  -1   67.87    3.59
   5  11   1   69.90    3.45
   5  11   1   68.08    3.41
   6 -11   1    3.86    0.50
  -6 -11  -1    4.13    0.64
  -6 -11  -1    3.70    0.74
  -6 -11  -1    3.81    0.52
   6 -11   1    4.31    0.56
   6 -11   1    4.41    0.55
  -6 -11  -1    3.57    0.57
  -6 -11  -1    2.92    0.40
   6  11   1    4.01    0.58
  -6  11  -1    3.49    0.45
   6  11   1    4.21    0.58
   6  11   1    4.08    0.62
   6  11   1    3.93    0.54
  -6  11  -1    3.33    0.67
   6  11   1    3.93    0.50
  -6  11  -1    3.33    0.49
   6  11   1    4.48    0.54
  -6  11  -1    3.75    0.47
  -6  11  -1    4.18    0.59
  -7 -11  -1    1.67    0.37
  -7 -11  -1    2.65    0.54
   7 -11   1    1.68    0.46
  -7 -11  -1    2.78    0.73
   7 -11   1    2.32    0.52
  -7 -11  -1    1.74    0.65
   7 -11   1    2.55    0.51
   7  11   1    2.84    0.56
  -7  11  -1    2.58    0.55
   7  11   1    1.91    0.46
   7  11   1    2.88    0.52
   7  11   1    3.05    0.57
  -7  11  -1    2.24    0.50
  -7  11  -1    2.21    0.68
   7  11   1    2.65    0.61
  -7  11  -1    2.37    0.42
  -7  11  -1    1.53    0.47
   8 -11   1   11.29    1.02
  -8 -11  -1   13.00    0.86
   8 -11   1   12.62    1.02
   8 -11   1   14.52    1.10
  -8 -11  -1   15.41    1.07
  -8 -11  -1   12.90    1.38
  -8 -11  -1   12.73    1.16
  -8  11  -1   13.23    1.16
   8  11   1   12.46    1.02
   8  11   1   13.60    1.12
   8  11   1   14.53    1.10
  -8  11  -1   14.36    1.07
  -8  11  -1   13.62    0.90
  -8  11  -1   14.20    1.36
   8  11   1   13.76    1.14
  -8  11  -1   12.86    0.98
   8  11   1   13.88    1.06
  -9 -11  -1    0.20    0.48
  -9 -11  -1    0.41    0.73
   9 -11   1   -0.51    0.45
  -9 -11  -1    0.34    0.68
   9 -11   1    0.34    0.52
   9 -11   1    0.31    0.53
  -9 -11  -1   -0.39    0.35
  -9  11  -1   -0.11    0.48
   9  11   1   -0.31    0.43
   9  11   1   -0.05    0.52
   9  11   1    0.74    0.52
  -9  11  -1    0.09    0.58
  -9  11  -1   -0.57    0.45
  -9  11  -1   -0.15    0.35
   9  11   1    0.11    0.52
   9  11   1   -1.00    0.53
 -10 -11  -1    9.02    1.12
 -10 -11  -1    8.10    0.87
  10 -11   1    9.36    0.95
  10 -11   1    9.94    0.92
  10 -11   1    6.54    0.87
 -10 -11  -1    9.97    1.37
  10  11   1    6.44    0.95
  10  11   1    8.42    0.95
 -10  11  -1    8.66    0.90
  10  11   1    8.27    0.86
  10  11   1    7.72    0.89
 -10  11  -1    8.69    0.89
  10  11   1   10.00    1.00
  11 -11   1    1.68    0.62
 -11 -11  -1   -0.13    0.83
  11 -11   1    1.32    0.72
 -11 -11  -1    0.89    0.91
  11 -11   1    0.78    0.60
  11  11   1    2.02    0.83
  11  11   1    1.00    0.63
  11  11   1    1.49    0.60
  11  11   1    1.35    0.68
 -11  11  -1    0.74    0.62
 -11  11  -1    1.65    0.65
 -12 -11  -1   -1.21    0.87
 -12 -11  -1    0.68    0.99
  12 -11   1   -0.12    0.64
  12 -11   1   -0.92    0.57
  12  11   1    0.60    0.73
 -12  11  -1   -0.32    0.61
 -12  11  -1    0.97    0.69
  12  11   1   -1.35    0.59
  12  11   1   -0.10    0.59
 -13 -11  -1    0.54    1.01
 -13 -11  -1    0.65    1.07
  13 -11   1   -0.18    0.68
  13 -11   1    0.73    0.73
  13  11   1    0.42    0.67
 -13  11  -1    1.17    0.73
 -13  11  -1    0.32    0.73
  13  11   1    0.41    0.82
  13  11   1    1.30    0.78
 -14 -11  -1    2.74    1.15
  14 -11   1    0.98    0.83
 -14 -11  -1    1.78    1.36
  14 -11   1    0.28    0.84
  14  11   1    1.88    0.78
  14  11   1   -0.18    0.78
 -14  11  -1    1.85    0.82
  14  11   1   -0.63    0.85
  15 -11   1    0.72    0.90
  15 -11   1    0.01    0.86
 -15 -11  -1   -0.72    1.06
  15  11   1   -0.19    0.86
  15  11   1    0.50    0.97
 -15  11  -1   -0.04    0.83
  15  11   1   -0.34    0.76
  16 -11   1    0.91    0.94
 -16 -11  -1    2.35    1.26
  16 -11   1    1.13    0.94
  16  11   1   -0.09    0.93
  16  11   1   -1.96    0.94
  16  11   1   -0.87    0.83
 -16  11  -1    0.13    0.90
  17 -11   1    7.67    1.38
  17 -11   1    5.71    1.43
 -17 -11  -1    5.77    1.47
 -17  11  -1    4.25    1.16
  17  11   1    6.43    1.30
  17  11   1    7.39    1.54
  17  11   1    5.06    1.15
  18 -11   1    1.74    1.19
 -18 -11  -1    1.20    1.30
  18  11   1    2.68    1.20
 -18  11  -1    1.25    1.08
  18  11   1    1.21    1.03
  18 -12  -1    6.12    1.34
 -18 -12   1    5.07    1.55
 -18 -12   1    4.99    1.88
  18  12  -1    6.64    1.36
 -18  12   1    4.13    1.11
  18  12  -1    3.54    1.12
  17 -12  -1    2.89    1.15
 -17 -12   1    3.55    1.51
  17 -12  -1    2.12    1.11
 -17 -12   1    1.02    1.28
 -17  12   1    3.16    1.01
  17  12  -1    3.03    1.16
  17  12  -1    2.20    1.23
  17  12  -1    2.58    1.00
 -16 -12   1    6.87    1.33
 -16 -12   1    6.70    1.64
  16 -12  -1    5.01    1.17
  16 -12  -1    4.93    1.13
  16  12  -1    5.76    1.10
  16  12  -1    3.74    1.19
  16  12  -1    6.63    1.20
 -16  12   1    4.92    1.04
 -15 -12   1    9.59    1.40
 -15 -12   1    7.10    1.55
  15 -12  -1    8.86    1.19
  15 -12  -1    9.26    1.24
  15  12  -1    7.88    1.33
  15  12  -1    9.03    1.21
 -15  12   1    9.20    1.15
  14 -12  -1   13.35    1.31
  14 -12  -1   14.00    1.35
 -14 -12   1   12.41    1.53
 -14 -12   1   12.56    1.79
 -14  12   1   16.25    1.33
  14  12  -1   13.29    1.44
  14  12  -1   11.72    1.31
  13 -12  -1    4.05    0.87
 -13 -12   1    4.53    1.26
 -13 -12   1    5.28    1.09
  13 -12  -1    4.50    0.86
  13  12  -1    4.72    0.91
  13  12  -1    3.39    0.93
 -13  12   1    3.86    0.82
 -12 -12   1    3.05    0.95
  12 -12  -1    3.47    0.79
 -12 -12   1    1.66    1.03
  12 -12  -1    2.57    0.74
 -12  12   1    2.92    0.75
  12  12  -1    3.89    0.80
  12  12  -1    2.90    0.80
 -12  12   1    2.67    0.71
  12  12  -1    1.74    0.85
  11 -12  -1    4.38    0.75
 -11 -12   1    3.85    1.08
 -11 -12   1    5.35    0.95
  11 -12  -1    3.05    0.70
 -11  12   1    5.44    0.74
  11  12  -1    3.97    0.74
  11  12  -1    3.32    0.83
  11  12  -1    3.96    0.82
 -11  12   1    4.71    0.84
 -11  12   1    4.62    0.72
 -10 -12   1    4.76    1.00
  10 -12  -1    3.64    0.68
  10 -12  -1    5.08    0.71
 -10 -12   1    4.10    0.92
 -10  12   1    4.89    0.70
  10  12  -1    4.22    0.78
 -10  12   1    4.75    0.78
 -10  12   1    3.50    0.65
  10  12  -1    3.56    0.76
  10  12  -1    4.12    0.69
   9 -12  -1    0.21    0.53
   9 -12  -1   -0.43    0.47
  -9 -12   1   -0.48    0.65
   9 -12  -1   -0.15    0.45
  -9 -12   1   -0.02    0.55
  -9 -12   1   -0.95    0.61
   9  12  -1    0.35    0.55
  -9  12   1    0.26    0.46
  -9  12   1   -0.03    0.70
  -9  12   1    0.62    0.48
  -9  12   1    1.15    0.53
   9  12  -1    0.61    0.49
   9  12  -1    0.82    0.53
   8 -12  -1   15.99    1.14
  -8 -12   1   12.53    1.14
  -8 -12   1   15.24    1.43
  -8 -12   1   15.94    1.21
   8 -12  -1   14.96    1.10
   8 -12  -1   16.57    1.06
  -8 -12   1   14.21    1.04
   8  12  -1   15.46    1.04
  -8  12   1   14.97    1.08
   8  12  -1   15.28    1.15
   8  12  -1   16.52    1.15
  -8  12   1   15.48    1.36
  -8  12   1   15.83    1.17
  -8  12   1   14.37    0.98
   8  12  -1   13.23    1.08
   8  12  -1   14.85    1.17
   8  12  -1   13.71    1.15
   7 -12  -1   30.73    1.61
  -7 -12   1   27.24    1.55
  -7 -12   1   24.68    1.63
  -7 -12   1   27.73    1.89
   7 -12  -1   27.47    1.57
   7 -12  -1   29.44    1.54
  -7 -12   1   24.94    1.59
  -7  12   1   27.50    1.79
   7  12  -1   28.40    1.53
   7  12  -1   27.24    1.57
   7  12  -1   25.08    1.59
   7  12  -1   26.78    1.53
   7  12  -1   25.97    1.61
  -7  12   1   27.90    1.58
  -7  12   1   27.04    1.46
   7  12  -1   26.29    1.61
  -6 -12   1   34.35    1.75
  -6 -12   1   26.74    1.67
  -6 -12   1   30.09    1.68
   6 -12  -1   29.57    1.64
   6 -12  -1   30.96    1.68
  -6 -12   1   29.39    1.94
   6 -12  -1   31.24    1.69
  -6  12   1   33.10    1.77
  -6  12   1   32.26    1.57
   6  12  -1   27.00    1.70
  -6  12   1   30.40    1.58
  -6  12   1   29.80    1.85
   6  12  -1   30.53    1.65
   6  12  -1   31.22    1.74
   6  12  -1   30.73    1.72
  -6  12   1   29.89    1.68
   6  12  -1   28.37    1.63
   6  12  -1   30.69    1.68
   5 -12  -1   22.16    1.23
  -5 -12   1   20.45    1.43
  -5 -12   1   18.08    1.07
   5 -12  -1   21.09    1.17
   5 -12  -1   20.26    1.27
   5 -12  -1   19.75    1.21
  -5 -12   1   17.54    1.19
  -5 -12   1   20.90    1.23
  -5 -12   1   20.58    1.23
   5  12  -1   19.97    1.16
   5  12  -1   19.69    1.21
  -5  12   1   21.15    1.23
  -5  12   1   21.15    1.13
  -5  12   1   21.44    1.28
  -5  12   1   21.00    1.37
   5  12  -1   20.90    1.30
   5  12  -1   20.54    1.20
   5  12  -1   20.32    1.18
   5  12  -1   20.31    1.24
   4 -12  -1    0.28    0.32
  -4 -12   1   -0.15    0.29
   4 -12  -1   -0.05    0.25
  -4 -12   1   -0.14    0.32
   4 -12  -1    0.33    0.36
   4 -12  -1    0.43    0.32
  -4 -12   1    0.25    0.32
   4 -12  -1    0.21    0.32
  -4 -12   1   -0.40    0.41
  -4 -12   1   -0.42    0.24
   4  12  -1   -0.18    0.28
  -4  12   1   -0.21    0.34
  -4  12   1    0.11    0.27
   4  12  -1    0.07    0.30
   4  12  -1   -0.31    0.36
   4  12  -1    0.01    0.29
  -4  12   1    0.29    0.34
   4  12  -1   -0.39    0.31
   4  12  -1    0.15    0.33
   3 -12  -1    0.26    0.30
  -3 -12   1    0.31    0.23
  -3 -12   1   -0.05    0.25
  -3 -12   1    0.04    0.27
  -3 -12   1   -0.62    0.29
   3 -12  -1    0.69    0.33
  -3 -12   1    0.40    0.40
   3 -12  -1   -0.01    0.24
   3 -12  -1    0.42    0.29
   3 -12  -1    0.24    0.33
   3  12  -1   -0.10    0.30
  -3  12   1   -0.13    0.26
  -3  12   1   -0.17    0.29
   3  12  -1   -0.30    0.28
  -3  12   1   -0.16    0.28
   3  12  -1   -0.09    0.26
   3  12  -1   -0.30    0.26
   3  12  -1   -0.28    0.29
   2 -12  -1   48.28    2.80
   2 -12  -1   52.56    2.59
  -2 -12   1   50.19    2.54
   2 -12  -1   53.34    2.63
   2 -12  -1   55.35    2.58
  -2 -12   1   53.34    2.63
   2 -12  -1   53.40    2.60
  -2 -12   1   51.76    2.60
  -2 -12   1   55.36    2.77
   2  12  -1   53.43    2.61
   2  12  -1   52.23    2.57
   2  12  -1   50.97    2.62
  -2  12   1   54.60    2.60
  -2  12   1   53.96    2.58
   2  12  -1   47.38    2.58
   2  12  -1   53.27    2.61
  -2  12   1   51.51    2.57
  -1 -12   1    3.30    0.50
   1 -12  -1    3.24    0.41
  -1 -12   1    3.50    0.41
   1 -12  -1    3.47    0.43
   1 -12  -1    3.76    0.46
  -1 -12   1    3.80    0.45
   1 -12  -1    3.35    0.37
  -1 -12   1    3.62    0.35
  -1 -12   1    3.16    0.41
  -1  12   1    3.26    0.40
  -1  12   1    3.17    0.40
   1  12  -1    3.37    0.40
  -1  12   1    2.72    0.38
   1  12  -1    3.46    0.39
   1  12  -1    2.53    0.39
   1  12  -1    3.49    0.41
  -1  12   1    3.22    0.39
   0 -12  -1   45.98    2.34
   0 -12   1   42.16    2.28
   0 -12   1   44.05    2.26
   0 -12   1   46.35    2.30
   0 -12  -1   48.91    2.28
   0 -12   1   51.13    2.44
   0 -12  -1   47.91    2.33
   0 -12   1   45.95    2.32
   0 -12  -1   47.91    2.29
   0  12   1   46.89    2.40
   0  12  -1   45.78    2.28
   0  12  -1   47.26    2.31
   0  12   1   44.22    2.29
   0  12   1   44.14    2.28
   0  12  -1   42.31    2.28
   0  12  -1   47.87    2.32
   0  12   1   45.93    2.29
   0  12  -1   43.91    2.28
   0  12   1   48.48    2.31
   1 -12   1   23.48    1.26
  -1 -12  -1   22.52    1.22
   1 -12   1   22.55    1.25
  -1 -12  -1   22.01    1.19
   1 -12   1   22.36    1.20
  -1 -12  -1   22.60    1.27
   1 -12   1   23.84    1.24
  -1 -12  -1   23.65    1.29
   1  12   1   22.56    1.23
   1  12   1   21.44    1.24
  -1  12  -1   22.68    1.23
   1  12   1   22.11    1.22
   1  12   1   21.15    1.22
   1  12   1   22.40    1.34
  -1  12  -1   23.63    1.27
  -1  12  -1   20.67    1.21
  -1  12  -1   22.19    1.21
   1  12   1   22.48    1.27
  -2 -12  -1   26.76    1.43
  -2 -12  -1   25.57    1.33
  -2 -12  -1   25.03    1.30
   2 -12   1   25.78    1.38
   2 -12   1   24.88    1.35
   2 -12   1   26.32    1.34
  -2 -12  -1   25.35    1.41
  -2 -12  -1   24.92    1.58
  -2 -12  -1   24.01    1.31
   2 -12   1   25.19    1.38
  -2  12  -1   25.19    1.45
   2  12   1   27.01    1.38
  -2  12  -1   25.70    1.34
   2  12   1   25.56    1.48
   2  12   1   23.04    1.36
   2  12   1   23.34    1.40
   2  12   1   23.45    1.35
  -2  12  -1   24.62    1.36
   2  12   1   25.04    1.37
  -2  12  -1   26.11    1.34
  -2  12  -1   23.98    1.38
   3 -12   1    0.62    0.32
  -3 -12  -1    0.60    0.37
  -3 -12  -1    0.84    0.33
  -3 -12  -1   -0.01    0.26
   3 -12   1    0.41    0.30
  -3 -12  -1    0.29    0.24
  -3 -12  -1    0.68    0.37
   3 -12   1    0.11    0.25
   3 -12   1    0.23    0.32
  -3 -12  -1   -0.23    0.15
  -3 -12  -1    0.59    0.44
   3  12   1    0.46    0.30
  -3  12  -1    0.36    0.36
   3  12   1    0.48    0.29
   3  12   1    0.23    0.32
  -3  12  -1    0.06    0.27
   3  12   1    0.40    0.38
  -3  12  -1   -0.28    0.28
   3  12   1    0.46    0.33
  -3  12  -1    0.55    0.31
   4 -12   1    2.36    0.43
   4 -12   1    2.82    0.43
  -4 -12  -1    1.92    0.59
  -4 -12  -1    2.50    0.37
   4 -12   1    1.56    0.35
  -4 -12  -1    2.97    0.49
  -4 -12  -1    2.60    0.46
  -4 -12  -1    2.89    0.39
   4 -12   1    2.10    0.42
  -4 -12  -1    2.78    0.47
  -4 -12  -1    1.64    0.33
   4  12   1    3.03    0.55
   4  12   1    2.01    0.45
   4  12   1    2.62    0.44
  -4  12  -1    2.53    0.51
  -4  12  -1    2.42    0.44
  -4  12  -1    2.23    0.38
   4  12   1    2.50    0.41
   4  12   1    2.99    0.45
  -5 -12  -1    1.21    0.57
  -5 -12  -1   -0.58    0.39
   5 -12   1    1.03    0.35
  -5 -12  -1    1.27    0.31
   5 -12   1    0.89    0.40
  -5 -12  -1    0.62    0.44
  -5 -12  -1    0.91    0.43
   5 -12   1    1.17    0.41
   5 -12   1    1.02    0.38
  -5  12  -1    0.90    0.29
   5  12   1    1.41    0.44
   5  12   1    1.22    0.49
   5  12   1    1.16    0.38
  -5  12  -1    1.51    0.53
   5  12   1    1.26    0.43
   5  12   1    0.97    0.41
  -5  12  -1    1.72    0.45
   5  12   1    0.96    0.37
  -5  12  -1    1.00    0.34
  -6 -12  -1  140.64    6.61
  -6 -12  -1  132.99    6.47
  -6 -12  -1  135.22    6.56
  -6 -12  -1  137.21    6.62
  -6 -12  -1  131.68    6.89
   6 -12   1  139.44    6.58
   6 -12   1  139.70    6.56
   6 -12   1  140.04    6.57
   6  12   1  131.52    6.58
   6  12   1  135.53    6.57
  -6  12  -1  135.89    6.59
   6  12   1  136.46    6.61
  -6  12  -1  133.37    6.76
   6  12   1  136.09    6.63
  -6  12  -1  136.86    6.49
  -6  12  -1  140.07    6.50
   6  12   1  137.74    6.67
   6  12   1  136.08    6.55
   7 -12   1   34.10    1.94
  -7 -12  -1   35.49    2.33
  -7 -12  -1   32.73    1.81
  -7 -12  -1   36.13    1.97
   7 -12   1   36.33    1.96
  -7 -12  -1   38.35    2.00
  -7 -12  -1   32.13    2.02
   7 -12   1   35.97    1.95
   7  12   1   35.85    2.07
  -7  12  -1   36.44    1.98
   7  12   1   34.53    1.93
   7  12   1   37.49    2.08
   7  12   1   34.95    2.04
   7  12   1   34.98    1.96
  -7  12  -1   34.84    2.20
  -7  12  -1   35.68    1.85
  -7  12  -1   35.62    1.88
  -8 -12  -1   10.69    0.76
  -8 -12  -1   11.06    0.95
   8 -12   1   10.64    0.94
  -8 -12  -1   11.47    1.32
   8 -12   1    9.57    0.91
   8 -12   1   11.09    0.92
  -8 -12  -1   11.44    1.12
  -8  12  -1    9.19    1.14
  -8  12  -1    9.59    1.14
  -8  12  -1   10.10    0.93
  -8  12  -1   10.70    0.86
   8  12   1   12.62    1.08
   8  12   1    8.32    0.93
   8  12   1    9.57    0.92
   8  12   1   11.47    0.95
  -8  12  -1    9.71    0.79
  -9 -12  -1   29.06    2.20
   9 -12   1   30.20    1.81
  -9 -12  -1   29.25    1.60
  -9 -12  -1   29.33    1.92
  -9 -12  -1   31.41    1.82
   9 -12   1   29.82    1.79
   9 -12   1   30.81    1.83
  -9  12  -1   28.78    1.61
  -9  12  -1   28.41    2.13
   9  12   1   29.83    1.89
   9  12   1   29.00    1.78
  -9  12  -1   30.11    1.73
  -9  12  -1   33.30    1.83
   9  12   1   28.88    1.91
   9  12   1   29.58    1.82
   9  12   1   31.01    1.86
  10 -12   1    1.39    0.59
  10 -12   1    2.68    0.69
 -10 -12  -1    4.08    0.91
 -10 -12  -1    2.38    1.00
  10 -12   1    2.15    0.64
 -10 -12  -1    1.74    0.45
 -10 -12  -1    0.56    0.82
  10  12   1    2.70    0.72
  10  12   1    2.84    0.77
  10  12   1    2.63    0.68
  10  12   1    3.65    0.75
 -10  12  -1    2.32    0.63
  10  12   1    2.33    0.60
 -10  12  -1    2.82    0.67
  11 -12   1    0.48    0.63
  11 -12   1   -0.02    0.59
 -11 -12  -1    0.51    0.88
  11 -12   1   -0.40    0.71
 -11 -12  -1    0.59    0.93
  11  12   1    0.30    0.65
  11  12   1   -0.25    0.61
 -11  12  -1    0.21    0.61
 -11  12  -1    0.14    0.57
  11  12   1   -0.22    0.53
  12 -12   1    5.36    0.92
 -12 -12  -1    6.73    1.40
 -12 -12  -1    5.01    1.15
  12 -12   1    5.01    0.90
  12  12   1    5.50    0.99
 -12  12  -1    6.99    0.93
 -12  12  -1    7.66    0.93
  12  12   1    5.99    0.87
  12  12   1    6.28    0.95
  13 -12   1    1.25    0.77
 -13 -12  -1    0.31    1.00
  13 -12   1    2.24    0.78
 -13 -12  -1    0.43    1.13
  13  12   1    0.09    0.84
  13  12   1    1.76    0.77
  13  12   1    1.02    0.75
 -13  12  -1    0.92    0.77
 -13  12  -1    0.90    0.75
  14 -12   1   16.27    1.60
  14 -12   1   19.21    1.59
 -14 -12  -1   20.99    1.90
  14  12   1   19.74    1.67
 -14  12  -1   19.38    1.57
  14  12   1   19.48    1.61
  14  12   1   15.62    1.68
  15 -12   1   -0.07    0.85
 -15 -12  -1    1.15    1.17
  15 -12   1    0.97    0.88
  15  12   1    0.77    0.91
  15  12   1    0.68    0.85
 -15  12  -1    1.06    0.88
  15  12   1   -0.28    0.95
  16 -12   1    6.64    1.25
  16 -12   1    8.42    1.19
 -16 -12  -1    5.44    1.44
 -16  12  -1    8.13    1.24
  16  12   1    8.93    1.32
  16  12   1    8.82    1.23
  16  12   1    8.04    1.45
 -17 -12  -1    0.05    1.33
  17 -12   1   -1.68    1.01
 -17  12  -1    0.06    0.97
  17  12   1    0.97    1.05
  17  12   1    1.43    0.97
 -18 -12  -1    2.90    1.43
  18 -12   1    0.98    1.12
 -18  12  -1    1.39    1.10
  18  12   1    2.09    1.18
  18  12   1    1.39    1.09
 -18 -13   1   -0.98    1.26
  18 -13  -1    0.88    1.13
 -18 -13   1    1.62    1.84
 -18  13   1    0.19    0.92
  18  13  -1    1.21    1.15
  18  13  -1   -0.70    0.99
 -17 -13   1    0.70    1.27
 -17 -13   1    3.31    1.50
  17 -13  -1    2.80    1.16
  17  13  -1    0.36    1.46
  17  13  -1    4.11    1.17
 -17  13   1    2.06    0.98
  17  13  -1    2.21    1.06
  16 -13  -1    4.99    1.14
  16 -13  -1    3.88    1.05
 -16 -13   1    3.18    1.46
 -16 -13   1    4.21    1.30
 -16  13   1    3.90    0.99
  16  13  -1    2.62    1.04
  16  13  -1    2.63    1.04
  16  13  -1    2.29    1.23
  15 -13  -1    7.10    1.16
 -15 -13   1    7.36    1.59
  15 -13  -1    6.33    1.12
 -15 -13   1    7.66    1.39
  15  13  -1    8.30    1.20
  15  13  -1    8.03    1.32
 -15  13   1    7.71    1.08
  15  13  -1    8.12    1.14
 -14 -13   1    2.89    1.09
 -14 -13   1    2.91    1.30
  14 -13  -1    3.42    0.92
  14 -13  -1    3.17    0.91
 -14  13   1    4.22    0.86
  14  13  -1    3.95    0.88
  14  13  -1    3.68    1.04
  14  13  -1    3.28    0.95
 -13 -13   1    0.34    1.03
  13 -13  -1   -0.56    0.72
 -13 -13   1    2.20    0.99
  13 -13  -1   -0.21    0.73
  13  13  -1    0.95    0.69
 -13  13   1    0.47    0.68
  13  13  -1    1.54    0.84
  13  13  -1   -0.01    0.73
  12 -13  -1   26.44    1.85
  12 -13  -1   29.52    1.89
 -12 -13   1   26.95    1.97
 -12 -13   1   24.30    2.27
 -12  13   1   31.93    1.79
 -12  13   1   29.75    1.83
  12  13  -1   29.65    2.08
  12  13  -1   31.32    1.88
  12  13  -1   23.86    1.90
  12  13  -1   29.49    1.91
  11 -13  -1    0.65    0.61
  11 -13  -1    1.27    0.64
 -11 -13   1    0.94    0.93
 -11 -13   1    1.97    0.87
 -11  13   1    1.01    0.58
  11  13  -1    1.20    0.66
  11  13  -1    0.37    0.71
  11  13  -1    1.54    0.62
 -11  13   1    2.82    0.67
  11  13  -1    1.37    0.72
  10 -13  -1    1.63    0.61
 -10 -13   1    0.76    0.70
 -10 -13   1   -0.63    0.72
 -10 -13   1    0.40    0.84
  10 -13  -1    1.47    0.56
 -10  13   1    1.03    0.52
  10  13  -1   -0.63    0.54
 -10  13   1    0.76    0.57
  10  13  -1    0.47    0.50
 -10  13   1    0.55    0.83
 -10  13   1    0.88    0.63
  10  13  -1    0.70    0.68
   9 -13  -1    1.45    0.56
   9 -13  -1    1.24    0.53
   9 -13  -1    1.00    0.57
  -9 -13   1    0.26    0.69
  -9 -13   1    1.48    0.80
  -9 -13   1    1.54    0.65
  -9  13   1    0.16    0.44
   9  13  -1    2.16    0.63
  -9  13   1    1.95    0.83
  -9  13   1    1.65    0.54
   9  13  -1    1.27    0.55
   9  13  -1    1.56    0.62
   9  13  -1    1.82    0.52
  -9  13   1    1.14    0.54
  -8 -13   1    8.04    0.87
  -8 -13   1    6.83    0.70
   8 -13  -1    8.16    0.82
   8 -13  -1    7.20    0.77
   8 -13  -1    7.54    0.74
  -8 -13   1    8.37    1.12
  -8 -13   1    7.79    0.87
  -8  13   1    6.90    0.81
   8  13  -1    7.61    0.84
  -8  13   1    7.87    0.76
   8  13  -1    7.70    0.82
   8  13  -1    7.24    0.76
  -8  13   1    7.69    0.68
   8  13  -1    7.59    0.73
   8  13  -1    7.24    0.82
  -8  13   1    7.57    1.00
   7 -13  -1   -0.37    0.44
  -7 -13   1   -0.14    0.49
   7 -13  -1   -0.54    0.36
  -7 -13   1    0.44    0.61
   7 -13  -1    0.35    0.43
  -7 -13   1    0.13    0.49
  -7 -13   1    0.58    0.43
   7  13  -1   -0.13    0.39
   7  13  -1   -0.39    0.41
   7  13  -1    1.06    0.47
   7  13  -1   -0.08    0.39
  -7  13   1   -0.06    0.40
   7  13  -1   -0.13    0.45
  -7  13   1   -0.06    0.30
   7  13  -1   -0.23    0.41
  -7  13   1   -0.29    0.32
  -7  13   1   -0.04    0.53
  -7  13   1   -0.59    0.40
   6 -13  -1   85.12    4.29
  -6 -13   1   82.39    4.28
   6 -13  -1   91.30    4.30
  -6 -13   1   89.68    4.30
  -6 -13   1   90.90    4.34
  -6 -13   1   86.36    4.58
   6 -13  -1   90.09    4.27
   6  13  -1   83.68    4.32
  -6  13   1   89.17    4.48
  -6  13   1   88.98    4.38
   6  13  -1   86.53    4.36
   6  13  -1   88.06    4.33
  -6  13   1   89.85    4.32
   6  13  -1   82.36    4.28
  -6  13   1   87.33    4.20
  -6  13   1   86.81    4.18
   6  13  -1   85.96    4.25
   6  13  -1   87.86    4.27
  -5 -13   1    1.43    0.45
  -5 -13   1    1.49    0.31
  -5 -13   1    1.83    0.58
   5 -13  -1    1.76    0.38
   5 -13  -1    1.75    0.46
  -5 -13   1    2.03    0.45
  -5 -13   1    1.65    0.42
   5 -13  -1    1.95    0.44
   5 -13  -1    1.74    0.44
   5  13  -1    0.83    0.43
   5  13  -1    1.70    0.40
   5  13  -1    1.02    0.41
   5  13  -1    1.50    0.39
  -5  13   1    1.85    0.51
  -5  13   1    1.87    0.37
   5  13  -1    1.87    0.51
  -5  13   1    2.10    0.46
   5  13  -1    2.42    0.43
  -4 -13   1   -0.62    0.35
  -4 -13   1    0.11    0.26
  -4 -13   1   -0.21    0.32
  -4 -13   1   -0.26    0.45
   4 -13  -1    0.13    0.35
   4 -13  -1   -0.15    0.36
  -4 -13   1   -0.52    0.31
   4 -13  -1   -0.27    0.27
   4 -13  -1    0.05    0.34
   4 -13  -1    0.26    0.35
  -4  13   1   -0.11    0.29
   4  13  -1   -0.04    0.32
  -4  13   1   -0.28    0.34
   4  13  -1    0.14    0.33
   4  13  -1   -0.16    0.30
   4  13  -1    0.99    0.42
   4  13  -1   -0.15    0.34
  -4  13   1    0.39    0.40
   4  13  -1   -0.36    0.34
  -3 -13   1    4.97    0.56
  -3 -13   1    5.72    0.53
   3 -13  -1    5.39    0.59
   3 -13  -1    4.88    0.48
   3 -13  -1    6.00    0.55
   3 -13  -1    5.56    0.56
  -3 -13   1    4.94    0.69
   3 -13  -1    5.59    0.57
  -3 -13   1    5.64    0.47
  -3 -13   1    4.76    0.47
   3  13  -1    5.49    0.52
  -3  13   1    6.10    0.52
   3  13  -1    5.62    0.58
   3  13  -1    5.91    0.54
  -3  13   1    6.08    0.64
  -3  13   1    5.71    0.55
   3  13  -1    5.26    0.50
   3  13  -1    5.11    0.55
   2 -13  -1   28.48    1.51
  -2 -13   1   28.18    1.50
  -2 -13   1   26.81    1.52
   2 -13  -1   28.27    1.49
  -2 -13   1   28.93    1.68
   2 -13  -1   28.52    1.48
   2 -13  -1   28.62    1.53
  -2 -13   1   26.75    1.43
  -2  13   1   27.36    1.48
   2  13  -1   26.35    1.49
   2  13  -1   26.99    1.51
   2  13  -1   27.59    1.53
   2  13  -1   28.35    1.47
  -2  13   1   29.59    1.48
  -2  13   1   28.10    1.50
   2  13  -1   27.64    1.49
   1 -13  -1    7.71    0.62
  -1 -13   1    7.81    0.64
   1 -13  -1    7.41    0.56
  -1 -13   1    6.61    0.52
  -1 -13   1    6.87    0.59
   1 -13  -1    5.64    0.59
   1 -13  -1    7.57    0.60
  -1 -13   1    6.71    0.71
  -1 -13   1    6.52    0.58
  -1  13   1    7.21    0.59
  -1  13   1    6.89    0.60
   1  13  -1    7.01    0.60
  -1  13   1    7.00    0.60
   1  13  -1    6.81    0.60
   1  13  -1    6.70    0.58
  -1  13   1    7.04    0.59
   1  13  -1    6.08    0.55
   0 -13   1    2.94    0.42
   0 -13   1    4.33    0.47
   0 -13  -1    3.78    0.38
   0 -13   1    3.02    0.51
   0 -13  -1    3.34    0.47
   0 -13   1    3.26    0.45
   0 -13  -1    3.12    0.45
   0 -13   1    3.45    0.39
   0 -13  -1    3.58    0.43
   0  13   1    2.81    0.39
   0  13  -1    3.67    0.42
   0  13   1    3.26    0.46
   0  13  -1    3.60    0.52
   0  13  -1    3.11    0.40
   0  13  -1    3.26    0.43
   0  13   1    3.41    0.42
   0  13   1    3.75    0.45
   0  13   1    3.45    0.49
   0  13  -1    3.79    0.43
   0  13   1    3.63    0.43
  -1 -13  -1   22.69    1.28
   1 -13   1   22.37    1.25
  -1 -13  -1   20.45    1.17
   1 -13   1   21.97    1.25
   1 -13   1   21.85    1.23
  -1 -13  -1   23.34    1.22
  -1 -13  -1   22.71    1.28
   1 -13   1   22.10    1.19
   1  13   1   20.06    1.25
   1  13   1   20.61    1.22
  -1  13  -1   20.93    1.23
   1  13   1   23.42    1.36
   1  13   1   20.91    1.21
  -1  13  -1   21.48    1.21
  -1  13  -1   21.15    1.21
   1  13   1   22.15    1.23
   1  13   1   22.45    1.23
  -1  13  -1   22.76    1.21
  -2 -13  -1  115.23    5.38
  -2 -13  -1  116.26    5.31
  -2 -13  -1  114.25    5.39
   2 -13   1  110.94    5.32
   2 -13   1  112.91    5.36
  -2 -13  -1  108.97    5.29
   2 -13   1  113.27    5.33
  -2 -13  -1  108.93    5.29
   2 -13   1  115.10    5.35
  -2 -13  -1  115.40    5.58
  -2  13  -1  112.00    5.31
   2  13   1  111.10    5.35
  -2  13  -1  109.20    5.34
  -2  13  -1  108.35    5.31
   2  13   1  111.82    5.34
  -2  13  -1  108.75    5.43
   2  13   1  105.15    5.38
   2  13   1  112.83    5.38
   2  13   1  109.89    5.45
   2  13   1  107.46    5.33
  -3 -13  -1    1.95    0.40
  -3 -13  -1    1.82    0.43
   3 -13   1    1.26    0.34
  -3 -13  -1    1.34    0.31
   3 -13   1    2.08    0.39
   3 -13   1    2.35    0.43
  -3 -13  -1    1.77    0.44
   3 -13   1    1.89    0.40
  -3 -13  -1    1.37    0.54
  -3 -13  -1    2.38    0.35
   3  13   1    1.73    0.37
   3  13   1    1.55    0.41
   3  13   1    2.08    0.40
  -3  13  -1    0.96    0.43
  -3  13  -1    1.90    0.41
  -3  13  -1    1.29    0.35
  -3  13  -1    1.49    0.35
   3  13   1    2.28    0.41
   3  13   1    1.53    0.48
  -4 -13  -1  222.86   10.75
   4 -13   1  220.81   10.44
  -4 -13  -1  217.83   10.48
   4 -13   1  213.79   10.47
  -4 -13  -1  212.33   10.40
  -4 -13  -1  232.69   10.41
   4 -13   1  219.38   10.46
  -4 -13  -1  225.05   10.52
  -4 -13  -1  223.76   10.43
  -4 -13  -1  221.22   10.47
   4 -13   1  225.28   10.48
   4  13   1  224.29   10.47
   4  13   1  219.12   10.48
  -4  13  -1  218.33   10.48
   4  13   1  225.48   10.58
   4  13   1  226.35   10.47
   4  13   1  222.47   10.52
  -4  13  -1  220.60   10.61
  -4  13  -1  215.97   10.42
  -5 -13  -1    1.93    0.36
  -5 -13  -1    3.77    0.57
   5 -13   1    2.56    0.49
  -5 -13  -1    1.42    0.46
  -5 -13  -1    2.43    0.67
   5 -13   1    3.19    0.55
   5 -13   1    2.29    0.45
   5 -13   1    2.81    0.49
[truncated: 3,865,407 more chars]
